# Supplementary material for: Collagen-rich omentum is a premetastatic niche for integrin α2-mediated peritoneal metastasis
Source: eLife. 2020 Oct 7;9:e59442. doi: 10.7554/eLife.59442 (PMC7541088; doi:10.7554/eLife.59442)
Supplement: Figure 7—source data 1. [file elife-59442-fig7-data1.xlsx]

## Sheet: Source Data_Phospho IGROV1
peptide	proteinName	ac	geneName	proteinDescription	idScore	idQValue	retentionTime	ptm	nbPtmsPerPeptide	motifX	modifCoord	allAccessions	004_POset_D19	005_POset_D19	006_POset_D19	001_POset_D19	002_POset_D19	003_POset_D19	medianInt_Condition2	medianInt_Condition1	cv_Condition2	cv_Condition1	log2ratio_Condition(1,2,3) (KO) / (004-006 WT)	fracNAFeatures.Condition2	fracNAFeatures.Condition1	pValue_Condition1	qValue_Condition1	FTestPValue	FTestQValue
AQEPPAGGGGSIHDLPLFTETSPTSAPWDPLPGPPPVLPHSPHSHL	sp|Q9NRG9|AAAS_HUMAN	Q9NRG9	AAAS	Aladin OS=Homo sapiens OX=9606 GN=AAAS PE=1 SV=1	12.15	0.00184523	99.3085	[41] Phospho (ST)	1	PPVLPHS*PHSHL	541	sp|Q9NRG9|AAAS_HUMAN	300051	403444	421474	397247	336617	345689	403444	345689	0.174731	0.0908771	-0.222896	0	0	0.869314	0.926698	0.869314	0.926698
FSPVLGR	sp|Q9NRG9|AAAS_HUMAN	Q9NRG9	AAAS	Aladin OS=Homo sapiens OX=9606 GN=AAAS PE=1 SV=1	30.47	0.000878314	75.7849	[2] Phospho (ST)	1	AQFPRFS*PVLGRA	495	sp|Q9NRG9|AAAS_HUMAN	867194	973786	944078	1.55355e+06	907994	2.2219e+06	944078	1.55355e+06	0.059254	0.420836	0.718588	0	0	0.151644	0.335567	0.151644	0.335567
NQGFSLLNSLTGTNHSIGSADPCHPEQPHLPAADSTESLSDHR	sp|Q6PD74|AAGAB_HUMAN	Q6PD74	AAGAB	Alpha- and gamma-adaptin-binding protein p34 OS=Homo sapiens OX=9606 GN=AAGAB PE=1 SV=1	14.71	0.0017505	95.1937	[35] Phospho (ST)	1	HLPAADS*TESLSD	215	sp|Q6PD74|AAGAB_HUMAN	279744	396743	439978	1.3247e+06	1.21704e+06	419258	396743	1.21704e+06	0.222753	0.501132	1.6171	0	0	0.0592771	0.197174	0.0592771	0.197174
AGQTQPNPGILPIQPALTPR	sp|Q2M2I8|AAK1_HUMAN	Q2M2I8	AAK1	AP2-associated protein kinase 1 OS=Homo sapiens OX=9606 GN=AAK1 PE=1 SV=3	66.1	0.000191241	97.4941	[18] Phospho (ST)	1	PIQPALT*PRKRAT	389	sp|Q2M2I8|AAK1_HUMAN	48629.7	45360	35731.2	16175	19595.5	14717.1	45360	16175	0.155073	0.148797	-1.48765	0	0.166667	0.00344536	0.0480272	0.00344536	0.0480272
EQGGSGLGSGSSGGGGSTSGLGSGYIGR	sp|Q2M2I8|AAK1_HUMAN	Q2M2I8	AAK1	AP2-associated protein kinase 1 OS=Homo sapiens OX=9606 GN=AAK1 PE=1 SV=3	125.4	0	77.7964	[12] Phospho (ST)	1	GLGSGSS*GGGGST	21	sp|Q2M2I8|AAK1_HUMAN	136254	125676	85683.5	78471.4	39653.3	171602	125676	78471.4	0.230196	0.702164	-0.679468	0	0.333333	0.445941	0.6239	0.445941	0.6239
EQGGSGLGSGSSGGGGSTSGLGSGYIGR	sp|Q2M2I8|AAK1_HUMAN	Q2M2I8	AAK1	AP2-associated protein kinase 1 OS=Homo sapiens OX=9606 GN=AAK1 PE=1 SV=3	43.66	0.000220824	76.9424	[5] Phospho (ST)	1	RREQGGS*GLGSGS	14	sp|Q2M2I8|AAK1_HUMAN	13120.7	2823.7	10091.4	2242.11	614.07	40856.7	10091.4	2242.11	0.609763	1.56329	-2.1702	0	0	0.599378	0.746535	0.599378	0.746535
ILSDVTHSAVFGVPASK	sp|Q2M2I8|AAK1_HUMAN	Q2M2I8	AAK1	AP2-associated protein kinase 1 OS=Homo sapiens OX=9606 GN=AAK1 PE=1 SV=3	143.74	0	97.5446	[3] Phospho (ST)	1	GHRRILS*DVTHSA	637	sp|Q2M2I8|AAK1_HUMAN	332277	442418	581926	751860	201230	814987	442418	751860	0.276669	0.57284	0.765055	0	0	0.790887	0.878758	0.790887	0.878758
RILSDVTHSAVFGVPASK	sp|Q2M2I8|AAK1_HUMAN	Q2M2I8	AAK1	AP2-associated protein kinase 1 OS=Homo sapiens OX=9606 GN=AAK1 PE=1 SV=3	49.61	0.000128025	94.883	[7] Phospho (ST)	1	RILSDVT*HSAVFG	640	sp|Q2M2I8|AAK1_HUMAN	15485.1	97142.4	134720	63378.8	3297.43	92964.6	97142.4	63378.8	0.739367	0.858609	-0.616101	0	0	0.494543	0.663908	0.494543	0.663908
STQLLQAAAAEASLNK	sp|Q2M2I8|AAK1_HUMAN	Q2M2I8	AAK1	AP2-associated protein kinase 1 OS=Homo sapiens OX=9606 GN=AAK1 PE=1 SV=3	28.77	0.000999078	94.883	[2] Phospho (ST)	1	VPASKST*QLLQAA	653	sp|Q2M2I8|AAK1_HUMAN	18311.3	19317.3	17895.4	101129	63113	578360	18311.3	101129	0.0394995	1.15998	2.4654	0.333333	0	0.0130415	0.0855992	0.0130415	0.0855992
VGSLTPPSSPK	sp|Q2M2I8|AAK1_HUMAN	Q2M2I8	AAK1	AP2-associated protein kinase 1 OS=Homo sapiens OX=9606 GN=AAK1 PE=1 SV=3	28.1	0.00106029	58.3271	[5] Phospho (ST)	1	QKVGSLT*PPSSPK	620	sp|Q2M2I8|AAK1_HUMAN	299885	290112	342831	517824	444079	462067	299885	462067	0.0901945	0.081007	0.623694	0	0	0.0526028	0.184404	0.0526028	0.184404
VGSLTPPSSPK	sp|Q2M2I8|AAK1_HUMAN	Q2M2I8	AAK1	AP2-associated protein kinase 1 OS=Homo sapiens OX=9606 GN=AAK1 PE=1 SV=3	23.81	0.0013071	56.5146	[5] Phospho (ST)|[9] Phospho (ST)	2	QKVGSLT*PPSSPK,SLTPPSS*PKTQRA	620624	sp|Q2M2I8|AAK1_HUMAN	3.51745e+06	3.41205e+06	3.68916e+06	2.57911e+06	2.65774e+06	2.54394e+06	3.51745e+06	2.57911e+06	0.0395169	0.0224666	-0.447654	0	0	0.110904	0.278527	0.110904	0.278527
VQTTPPPAVQGQK	sp|Q2M2I8|AAK1_HUMAN	Q2M2I8	AAK1	AP2-associated protein kinase 1 OS=Homo sapiens OX=9606 GN=AAK1 PE=1 SV=3	27.46	0.00104439	43.6673	[4] Phospho (ST)	1	QPKVQTT*PPPAVQ	606	sp|Q2M2I8|AAK1_HUMAN	4.12731e+06	3.94522e+06	3.51016e+06	1.6749e+06	2.37294e+06	2.25855e+06	3.94522e+06	2.25855e+06	0.0821304	0.178098	-0.804711	0	0	0.0198487	0.107141	0.0198487	0.107141
VDDSSEDKTEFTVK	sp|P49588|SYAC_HUMAN	P49588	AARS	Alanine--tRNA ligase, cytoplasmic OS=Homo sapiens OX=9606 GN=AARS PE=1 SV=2	46.29	0.000117275	54.9863	[5] Phospho (ST)	1	VKVDDSS*EDKTEF	555	sp|P49588|SYAC_HUMAN	73642.4	67552	68997.9	175373	80693.8	2.03734e+06	68997.9	175373	0.0454171	1.4433	1.3458	0	0	0.132169	0.308477	0.132169	0.308477
HQDVPSQDDSKPTQR	sp|Q9NRN7|ADPPT_HUMAN	Q9NRN7	AASDHPPT	L-aminoadipate-semialdehyde dehydrogenase-phosphopantetheinyl transferase OS=Homo sapiens OX=9606 GN=AASDHPPT PE=1 SV=2	39.02	0.000491207	21.5239	[6] Phospho (ST)	1	RHQDVPS*QDDSKP	258	sp|Q9NRN7|ADPPT_HUMAN	25144.7	87501.2	33362.2	11089.7	90610.4	42492.4	33362.2	42492.4	0.696113	0.833304	0.348989	0	0	0.784863	0.875171	0.784863	0.875171
AGDRNSEDDGVVMTFSSVK	sp|Q9NY61|AATF_HUMAN	Q9NY61	AATF	Protein AATF OS=Homo sapiens OX=9606 GN=AATF PE=1 SV=1	34.11	0.000521694	88.674	[6] Phospho (ST)	1	RAGDRNS*EDDGVV	203	sp|Q9NY61|AATF_HUMAN	131941	138509	142834	240190	166112	92842.4	138509	166112	0.0398161	0.442802	0.262176	0	0	0.697982	0.817382	0.697982	0.817382
YLVDGTKPNAGSEEISSEDDELVEEK	sp|Q9NY61|AATF_HUMAN	Q9NY61	AATF	Protein AATF OS=Homo sapiens OX=9606 GN=AATF PE=1 SV=1	18.85	0.0015671	85.7713	[16] Phospho (ST)|[17] Phospho (ST)	2	AGSEEIS*SEDDEL,GSEEISS*EDDELV	320321	sp|Q9NY61|AATF_HUMAN	1.16347e+06	1.19354e+06	1.22162e+06	1.21176e+06	1.38138e+06	2.2309e+06	1.19354e+06	1.38138e+06	0.0243791	0.339587	0.210872	0	0	0.292184	0.490764	0.292184	0.490764
YLVDGTKPNAGSEEISSEDDELVEEKK	sp|Q9NY61|AATF_HUMAN	Q9NY61	AATF	Protein AATF OS=Homo sapiens OX=9606 GN=AATF PE=1 SV=1	16.34	0.00149916	82.93	[12] Phospho (ST)|[16] Phospho (ST)|[17] Phospho (ST)	3	TKPNAGS*EEISSE,AGSEEIS*SEDDEL,GSEEISS*EDDELV	316320321	sp|Q9NY61|AATF_HUMAN	1.49287e+06	1.72662e+06	1.13181e+06	1.00219e+06	3.12804e+06	3.17122e+06	1.49287e+06	3.12804e+06	0.206607	0.509493	1.06717	0	0	0.321809	0.5169	0.321809	0.5169
YLVDGTKPNAGSEEISSEDDELVEEKK	sp|Q9NY61|AATF_HUMAN	Q9NY61	AATF	Protein AATF OS=Homo sapiens OX=9606 GN=AATF PE=1 SV=1	44.25	0.00022414	81.4944	[16] Phospho (ST)|[17] Phospho (ST)	2	AGSEEIS*SEDDEL,GSEEISS*EDDELV	320321	sp|Q9NY61|AATF_HUMAN	605418	624697	532977	599467	940873	23847.3	605418	599467	0.0822866	0.888905	-0.0142516	0	0	0.400572	0.587586	0.400572	0.587586
HHNSTAELQK	sp|P33527|MRP1_HUMAN	P33527	ABCC1	Multidrug resistance-associated protein 1 OS=Homo sapiens OX=9606 GN=ABCC1 PE=1 SV=3	72.96	0.00022686	16.5828	[4] Phospho (ST)	1	ISRHHNS*TAELQK	930	sp|P33527|MRP1_HUMAN	103921	168329	173281	41702	144043	85610.5	168329	85610.5	0.260552	0.567618	-0.975425	0	0	0.16647	0.354044	0.16647	0.354044
QLSSSSSYSGDISR	sp|P33527|MRP1_HUMAN	P33527	ABCC1	Multidrug resistance-associated protein 1 OS=Homo sapiens OX=9606 GN=ABCC1 PE=1 SV=3	41.56	0.000313545	54.7723	[6] Phospho (ST)|[7] Phospho (ST)	2	RQLSSSS*SYSGDI,QLSSSSS*YSGDIS	918919	sp|P33527|MRP1_HUMAN	19942.1	62650.6	33093.7	106661	6777.48	12097.9	33093.7	12097.9	0.567216	1.34292	-1.45181	0	0	0.532828	0.69498	0.532828	0.69498
QLSSSSSYSGDISR	sp|P33527|MRP1_HUMAN	P33527	ABCC1	Multidrug resistance-associated protein 1 OS=Homo sapiens OX=9606 GN=ABCC1 PE=1 SV=3	58.07	0.000157233	52.243	[7] Phospho (ST)	1	QLSSSSS*YSGDIS	919	sp|P33527|MRP1_HUMAN	50340.5	39882.5	47796.7	110960	65233.1	156112	47796.7	110960	0.118547	0.410224	1.21506	0	0	0.0267705	0.125598	0.0267705	0.125598
QLSALSSDGEGQGRPVPR	sp|O15438|MRP3_HUMAN	O15438	ABCC3	Canalicular multispecific organic anion transporter 2 OS=Homo sapiens OX=9606 GN=ABCC3 PE=1 SV=3	37.41	0.000471876	66.8743	[3] Phospho (ST)|[6] Phospho (ST)	2	QFMRQLS*ALSSDG,RQLSALS*SDGEGQ	908911	sp|O15438|MRP3_HUMAN	74236.9	89061	90888.2	53026.6	6056.43	15132	89061	15132	0.107779	1.00714	-2.55719	0	0	0.0305101	0.135502	0.0305101	0.135502
QLSALSSDGEGQGRPVPR	sp|O15438|MRP3_HUMAN	O15438	ABCC3	Canalicular multispecific organic anion transporter 2 OS=Homo sapiens OX=9606 GN=ABCC3 PE=1 SV=3	14.68	0.00174968	66.8301	[3] Phospho (ST)|[7] Phospho (ST)	2	QFMRQLS*ALSSDG,QLSALSS*DGEGQG	908912	sp|O15438|MRP3_HUMAN	26141.2	37559.7	60345.5	18908.1	10799.2	161759	37559.7	18908.1	0.421152	1.33046	-0.990185	0	0.333333	0.802956	0.88678	0.802956	0.88678
QLSALSSDGEGQGRPVPR	sp|O15438|MRP3_HUMAN	O15438	ABCC3	Canalicular multispecific organic anion transporter 2 OS=Homo sapiens OX=9606 GN=ABCC3 PE=1 SV=3	15.64	0.00165936	62.2017	[6] Phospho (ST)	1	RQLSALS*SDGEGQ	911	sp|O15438|MRP3_HUMAN	112993	172496	191372	75392.7	49646.6	58278.3	172496	58278.3	0.257352	0.214446	-1.56553	0	0.333333	0.00807601	0.0683022	0.00807601	0.0683022
DNEESEQPPVPGTPTLR	sp|O15439|MRP4_HUMAN	O15439	ABCC4	Multidrug resistance-associated protein 4 OS=Homo sapiens OX=9606 GN=ABCC4 PE=1 SV=3	38.56	0.000485861	77.2464	[13] Phospho (ST)	1	QPPVPGT*PTLRNR	646	sp|O15439|MRP4_HUMAN	2.14051e+06	2.30939e+06	2.18803e+06	2.65885e+06	1.26091e+06	1.51577e+06	2.18803e+06	1.51577e+06	0.03936	0.410915	-0.529583	0	0	0.356426	0.547856	0.356426	0.547856
KDNEESEQPPVPGTPTLR	sp|O15439|MRP4_HUMAN	O15439	ABCC4	Multidrug resistance-associated protein 4 OS=Homo sapiens OX=9606 GN=ABCC4 PE=1 SV=3	109.33	0	70.1689	[14] Phospho (ST)	1	QPPVPGT*PTLRNR	646	sp|O15439|MRP4_HUMAN	1.44858e+06	1.93779e+06	1.92097e+06	2.11674e+06	1.70709e+06	2.46342e+06	1.92097e+06	2.11674e+06	0.15698	0.18065	0.140006	0	0	0.443443	0.621955	0.443443	0.621955
TFSESSVWSQQSSRPSLK	sp|O15439|MRP4_HUMAN	O15439	ABCC4	Multidrug resistance-associated protein 4 OS=Homo sapiens OX=9606 GN=ABCC4 PE=1 SV=3	16.33	0.00149889	82.3937	[13] Phospho (ST)	1	VWSQQSS*RPSLKD	665	sp|O15439|MRP4_HUMAN	148457	150737	199449	130840	47583.8	141057	150737	130840	0.1733	0.481461	-0.204225	0	0	0.17334	0.363136	0.17334	0.363136
NATLAWDSSHSSIQNSPK	sp|O15440|MRP5_HUMAN	O15440	ABCC5	Multidrug resistance-associated protein 5 OS=Homo sapiens OX=9606 GN=ABCC5 PE=1 SV=2	56.92	0.000152765	74.4029	[12] Phospho (ST)|[16] Phospho (ST)	2	WDSSHSS*IQNSPK,HSSIQNS*PKLTPK	505509	sp|O15440|MRP5_HUMAN	181406	265716	279705	199984	57869.8	108131	265716	108131	0.219488	0.590716	-1.2971	0	0	0.07462	0.223244	0.07462	0.223244
NATLAWDSSHSSIQNSPK	sp|O15440|MRP5_HUMAN	O15440	ABCC5	Multidrug resistance-associated protein 5 OS=Homo sapiens OX=9606 GN=ABCC5 PE=1 SV=2	125.47	0	71.7759	[16] Phospho (ST)	1	HSSIQNS*PKLTPK	509	sp|O15440|MRP5_HUMAN	495664	501253	608179	510074	338219	442193	501253	442193	0.118514	0.201219	-0.180863	0	0	0.300929	0.49827	0.300929	0.49827
SGKPPLQNNEK	sp|P28288|ABCD3_HUMAN	P28288	ABCD3	ATP-binding cassette sub-family D member 3 OS=Homo sapiens OX=9606 GN=ABCD3 PE=1 SV=1	19.68	0.00152886	23.0243	[1] Phospho (ST)	1	GLHGKKS*GKPPLQ	40	sp|P28288|ABCD3_HUMAN	30783.3	76251.7	118721	14323.7	134250	308796	76251.7	134250	0.5844	0.97128	0.816081	0	0	0.779897	0.872108	0.779897	0.872108
AEQGSEEEGEGEEEEEEGGESK	sp|Q8NE71|ABCF1_HUMAN	Q8NE71	ABCF1	ATP-binding cassette sub-family F member 1 OS=Homo sapiens OX=9606 GN=ABCF1 PE=1 SV=2	213.01	0	30.5782	[5] Phospho (ST)	1	KKAEQGS*EEEGEG	228	sp|Q8NE71|ABCF1_HUMAN	2.44129e+06	2.00331e+06	1.80537e+06	4.86059e+06	2.27549e+06	5.16117e+06	2.00331e+06	4.86059e+06	0.156204	0.387016	1.27875	0	0	0.0755952	0.224742	0.0755952	0.224742
AEQGSEEEGEGEEEEEEGGESKADDPYAHLSK	sp|Q8NE71|ABCF1_HUMAN	Q8NE71	ABCF1	ATP-binding cassette sub-family F member 1 OS=Homo sapiens OX=9606 GN=ABCF1 PE=1 SV=2	115.01	0	58.7314	[5] Phospho (ST)	1	KKAEQGS*EEEGEG	228	sp|Q8NE71|ABCF1_HUMAN	2.78262e+06	3.0464e+06	3.78814e+06	3.63789e+06	2.49092e+06	3.04845e+06	3.0464e+06	3.04845e+06	0.16263	0.187494	0.000972109	0	0	0.813138	0.893538	0.813138	0.893538
AEQGSEEEGEGEEEEEEGGESKADDPYAHLSKK	sp|Q8NE71|ABCF1_HUMAN	Q8NE71	ABCF1	ATP-binding cassette sub-family F member 1 OS=Homo sapiens OX=9606 GN=ABCF1 PE=1 SV=2	28.2	0.00106262	52.9931	[5] Phospho (ST)	1	KKAEQGS*EEEGEG	228	sp|Q8NE71|ABCF1_HUMAN	7716.75	92054.9	25510.7	1306.59	27691.8	15842.7	25510.7	15842.7	1.06452	0.884147	-0.687282	0	0	0.301108	0.498477	0.301108	0.498477
GGNVFAALIQDQSEEEEEEEKHPPKPAKPEK	sp|Q8NE71|ABCF1_HUMAN	Q8NE71	ABCF1	ATP-binding cassette sub-family F member 1 OS=Homo sapiens OX=9606 GN=ABCF1 PE=1 SV=2	39.54	0.000497067	88.2493	[13] Phospho (ST)	1	ALIQDQS*EEEEEE	140	sp|Q8NE71|ABCF1_HUMAN	1.81665e+07	1.9835e+07	2.03483e+07	1.4046e+07	2.09553e+07	7.33048e+06	1.9835e+07	1.4046e+07	0.0586483	0.482803	-0.497887	0	0	0.23561	0.435992	0.23561	0.435992
KAEQGSEEEGEGEEEEEEGGESK	sp|Q8NE71|ABCF1_HUMAN	Q8NE71	ABCF1	ATP-binding cassette sub-family F member 1 OS=Homo sapiens OX=9606 GN=ABCF1 PE=1 SV=2	219.95	0	26.8717	[6] Phospho (ST)	1	KKAEQGS*EEEGEG	228	sp|Q8NE71|ABCF1_HUMAN	2.13999e+07	2.31164e+07	2.592e+07	1.96235e+07	2.93302e+07	1.27674e+07	2.31164e+07	1.96235e+07	0.097183	0.404505	-0.236334	0	0	0.510784	0.677492	0.510784	0.677492
KAEQGSEEEGEGEEEEEEGGESKADDPYAHLSK	sp|Q8NE71|ABCF1_HUMAN	Q8NE71	ABCF1	ATP-binding cassette sub-family F member 1 OS=Homo sapiens OX=9606 GN=ABCF1 PE=1 SV=2	132.19	0	53.9847	[6] Phospho (ST)	1	KKAEQGS*EEEGEG	228	sp|Q8NE71|ABCF1_HUMAN	1.79062e+07	1.1191e+07	9.98845e+06	1.13441e+07	7.04856e+06	7.21664e+06	1.1191e+07	7.21664e+06	0.327493	0.285008	-0.632934	0	0.111111	0.162262	0.349154	0.162262	0.349154
KAEQGSEEEGEGEEEEEEGGESKADDPYAHLSKK	sp|Q8NE71|ABCF1_HUMAN	Q8NE71	ABCF1	ATP-binding cassette sub-family F member 1 OS=Homo sapiens OX=9606 GN=ABCF1 PE=1 SV=2	51.99	0.000135483	48.8447	[6] Phospho (ST)	1	KKAEQGS*EEEGEG	228	sp|Q8NE71|ABCF1_HUMAN	139176	412840	81380	18626	52526.7	69954.1	139176	52526.7	0.838616	0.554919	-1.40578	0	0	0.0462103	0.171607	0.0462103	0.171607
KLSVPTSDEEDEVPAPK	sp|Q8NE71|ABCF1_HUMAN	Q8NE71	ABCF1	ATP-binding cassette sub-family F member 1 OS=Homo sapiens OX=9606 GN=ABCF1 PE=1 SV=2	29.83	0.000944956	78.4173	[3] Phospho (ST)|[6] Phospho (ST)|[7] Phospho (ST)	3	ERLKKLS*VPTSDE,KKLSVPT*SDEEDE,KLSVPTS*DEEDEV	105108109	sp|Q8NE71|ABCF1_HUMAN	174836	183974	111645	65554.7	36167.4	21995.2	174836	36167.4	0.251163	0.538766	-2.27324	0	0	0.0069886	0.0640944	0.0069886	0.0640944
KLSVPTSDEEDEVPAPK	sp|Q8NE71|ABCF1_HUMAN	Q8NE71	ABCF1	ATP-binding cassette sub-family F member 1 OS=Homo sapiens OX=9606 GN=ABCF1 PE=1 SV=2	40.05	0.000403185	77.3212	[6] Phospho (ST)|[7] Phospho (ST)	2	KKLSVPT*SDEEDE,KLSVPTS*DEEDEV	108109	sp|Q8NE71|ABCF1_HUMAN	90375	59474	20915.6	20442.4	5350.8	27274.8	59474	20442.4	0.611367	0.634184	-1.5407	0	0	0.0872267	0.243489	0.0872267	0.243489
KLSVPTSDEEDEVPAPKPR	sp|Q8NE71|ABCF1_HUMAN	Q8NE71	ABCF1	ATP-binding cassette sub-family F member 1 OS=Homo sapiens OX=9606 GN=ABCF1 PE=1 SV=2	65.51	0.000189251	76.5543	[3] Phospho (ST)|[6] Phospho (ST)|[7] Phospho (ST)	3	ERLKKLS*VPTSDE,KKLSVPT*SDEEDE,KLSVPTS*DEEDEV	105108109	sp|Q8NE71|ABCF1_HUMAN	9.57013e+06	9.725e+06	8.15917e+06	4.63049e+06	6.4185e+06	1.44384e+06	9.57013e+06	4.63049e+06	0.0942809	0.60512	-1.04737	0	0	0.0651512	0.206346	0.0651512	0.206346
KLSVPTSDEEDEVPAPKPR	sp|Q8NE71|ABCF1_HUMAN	Q8NE71	ABCF1	ATP-binding cassette sub-family F member 1 OS=Homo sapiens OX=9606 GN=ABCF1 PE=1 SV=2	29.88	0.000946223	75.5695	[3] Phospho (ST)|[7] Phospho (ST)	2	ERLKKLS*VPTSDE,KLSVPTS*DEEDEV	105109	sp|Q8NE71|ABCF1_HUMAN	515155	550206	624200	1.17774e+06	1.11436e+06	819758	550206	1.11436e+06	0.0988478	0.184165	1.01818	0	0	0.0232687	0.116244	0.0232687	0.116244
KLSVPTSDEEDEVPAPKPR	sp|Q8NE71|ABCF1_HUMAN	Q8NE71	ABCF1	ATP-binding cassette sub-family F member 1 OS=Homo sapiens OX=9606 GN=ABCF1 PE=1 SV=2	89.75	0	74.6517	[6] Phospho (ST)|[7] Phospho (ST)	2	KKLSVPT*SDEEDE,KLSVPTS*DEEDEV	108109	sp|Q8NE71|ABCF1_HUMAN	2.59696e+06	2.89028e+06	2.77448e+06	2.88069e+06	2.09462e+06	1.51071e+06	2.77448e+06	2.09462e+06	0.0536462	0.317978	-0.40553	0	0	0.275548	0.479367	0.275548	0.479367
KLSVPTSDEEDEVPAPKPR	sp|Q8NE71|ABCF1_HUMAN	Q8NE71	ABCF1	ATP-binding cassette sub-family F member 1 OS=Homo sapiens OX=9606 GN=ABCF1 PE=1 SV=2	37.09	0.000468735	72.0724	[7] Phospho (ST)	1	KLSVPTS*DEEDEV	109	sp|Q8NE71|ABCF1_HUMAN	3.80495e+06	3.0961e+06	3.08831e+06	4.82765e+06	4.58914e+06	7.00642e+06	3.0961e+06	4.82765e+06	0.123588	0.243336	0.640869	0	0	0.0606296	0.198968	0.0606296	0.198968
LSVPTSDEEDEVPAPKPR	sp|Q8NE71|ABCF1_HUMAN	Q8NE71	ABCF1	ATP-binding cassette sub-family F member 1 OS=Homo sapiens OX=9606 GN=ABCF1 PE=1 SV=2	79.63	0.000269324	78.6037	[5] Phospho (ST)|[6] Phospho (ST)	2	KKLSVPT*SDEEDE,KLSVPTS*DEEDEV	108109	sp|Q8NE71|ABCF1_HUMAN	4.68801e+06	4.67039e+06	4.22683e+06	2.35206e+06	3.70771e+06	2.71481e+06	4.67039e+06	2.71481e+06	0.0577067	0.239947	-0.782689	0	0	0.0670672	0.209433	0.0670672	0.209433
LSVPTSDEEDEVPAPKPR	sp|Q8NE71|ABCF1_HUMAN	Q8NE71	ABCF1	ATP-binding cassette sub-family F member 1 OS=Homo sapiens OX=9606 GN=ABCF1 PE=1 SV=2	97.48	0	77.3212	[6] Phospho (ST)	1	KLSVPTS*DEEDEV	109	sp|Q8NE71|ABCF1_HUMAN	1.1119e+07	9.80595e+06	1.01723e+07	15292140	1.30455e+07	1.50854e+07	1.01723e+07	1.50854e+07	0.0653677	0.0857897	0.568504	0	0	0.103435	0.267697	0.103435	0.267697
QQPPEPEWIGDGESTSPSDK	sp|Q8NE71|ABCF1_HUMAN	Q8NE71	ABCF1	ATP-binding cassette sub-family F member 1 OS=Homo sapiens OX=9606 GN=ABCF1 PE=1 SV=2	54.49	0.000143988	83.9885	[16] Phospho (ST)	1	GDGESTS*PSDKVV	22	sp|Q8NE71|ABCF1_HUMAN	2.49381e+06	2.25973e+06	2.33071e+06	3.83833e+06	2.58725e+06	7.80267e+06	2.33071e+06	3.83833e+06	0.0508258	0.574098	0.719711	0	0	0.116277	0.286863	0.116277	0.286863
QQPPEPEWIGDGESTSPSDKVVK	sp|Q8NE71|ABCF1_HUMAN	Q8NE71	ABCF1	ATP-binding cassette sub-family F member 1 OS=Homo sapiens OX=9606 GN=ABCF1 PE=1 SV=2	16.07	0.00155159	85.612	[16] Phospho (ST)	1	GDGESTS*PSDKVV	22	sp|Q8NE71|ABCF1_HUMAN	162751	269296	214016	182663	150331	1.30178e+06	214016	182663	0.24743	1.2032	-0.22853	0	0	0.499034	0.667753	0.499034	0.667753
GTLGRNTPYK	sp|Q8IZP0|ABI1_HUMAN	Q8IZP0	ABI1	Abl interactor 1 OS=Homo sapiens OX=9606 GN=ABI1 PE=1 SV=4	20.56	0.00148781	30.4944	[7] Phospho (ST)	1	GTLGRNT*PYKTLE	196	sp|Q8IZP0|ABI1_HUMAN	7447.41	8172.51	15254.6	2111.44	69.0232	1805.03	8172.51	1805.03	0.419126	0.82909	-2.17875	0	0	0.0338595	0.144372	0.0338595	0.144372
HNSTTSSTSSGGYR	sp|Q8IZP0|ABI1_HUMAN	Q8IZP0	ABI1	Abl interactor 1 OS=Homo sapiens OX=9606 GN=ABI1 PE=1 SV=4	76.51	0.000248818	17.7965	[3] Phospho (ST)	1	QISRHNS*TTSSTS	323	sp|Q8IZP0|ABI1_HUMAN	70573.6	62118.3	154793	118601	52114.1	495845	70573.6	118601	0.534702	1.07709	0.748911	0	0	0.455978	0.631173	0.455978	0.631173
LGSQHSPGR	sp|Q8IZP0|ABI1_HUMAN	Q8IZP0	ABI1	Abl interactor 1 OS=Homo sapiens OX=9606 GN=ABI1 PE=1 SV=4	35.59	0.000451427	15.4218	[6] Phospho (ST)	1	RLGSQHS*PGRTAS	225	sp|Q8IZP0|ABI1_HUMAN	78045.7	26372.9	115631	121953	31006.5	267863	78045.7	121953	0.610961	0.851807	0.643935	0	0	0.500392	0.669133	0.500392	0.669133
TASLNQRPR	sp|Q8IZP0|ABI1_HUMAN	Q8IZP0	ABI1	Abl interactor 1 OS=Homo sapiens OX=9606 GN=ABI1 PE=1 SV=4	26.25	0.00116144	24.0132	[3] Phospho (ST)	1	SPGRTAS*LNQRPR	231	sp|Q8IZP0|ABI1_HUMAN	905215	1.89481e+06	1.59517e+06	490518	633918	1.49551e+06	1.59517e+06	633918	0.346377	0.622438	-1.33134	0	0	0.173	0.362695	0.173	0.362695
TLEPVKPPTVPNDYMTSPAR	sp|Q8IZP0|ABI1_HUMAN	Q8IZP0	ABI1	Abl interactor 1 OS=Homo sapiens OX=9606 GN=ABI1 PE=1 SV=4	31.95	0.000745033	84.326	[15] Oxidation (M)|[17] Phospho (ST)	2	TVPNDYM*TSPARL,PNDYMTS*PARLGS	214216	sp|Q8IZP0|ABI1_HUMAN	141379	97894.9	116757	92225	117029	63376.4	116757	92225	0.183739	0.295472	-0.340281	0	0	0.279385	0.483187	0.279385	0.483187
TLEPVKPPTVPNDYMTSPAR	sp|Q8IZP0|ABI1_HUMAN	Q8IZP0	ABI1	Abl interactor 1 OS=Homo sapiens OX=9606 GN=ABI1 PE=1 SV=4	44.36	0.000224568	89.6437	[17] Phospho (ST)	1	PNDYMTS*PARLGS	216	sp|Q8IZP0|ABI1_HUMAN	204554	166567	161727	95197.5	99125.8	131222	166567	99125.8	0.132049	0.182118	-0.748772	0	0	0.045363	0.169911	0.045363	0.169911
TNPPTQKPPSPPMSGR	sp|Q8IZP0|ABI1_HUMAN	Q8IZP0	ABI1	Abl interactor 1 OS=Homo sapiens OX=9606 GN=ABI1 PE=1 SV=4	47.82	0.000122205	53.7125	[10] Phospho (ST)	1	PTQKPPS*PPMSGR	183	sp|Q8IZP0|ABI1_HUMAN	2.70121e+07	2.44115e+07	2.74473e+07	1.95793e+07	2.96526e+07	4.46166e+07	2.70121e+07	2.96526e+07	0.0624419	0.402713	0.134549	0	0	0.663558	0.793949	0.663558	0.793949
TNPPTQKPPSPPMSGR	sp|Q8IZP0|ABI1_HUMAN	Q8IZP0	ABI1	Abl interactor 1 OS=Homo sapiens OX=9606 GN=ABI1 PE=1 SV=4	54.3	0.000143246	42.3736	[10] Phospho (ST)|[13] Oxidation (M)	2	PTQKPPS*PPMSGR,KPPSPPM*SGRGTL	183186	sp|Q8IZP0|ABI1_HUMAN	3.12088e+07	2.09785e+07	2.17894e+07	4.05878e+07	5.23728e+07	6.00467e+07	2.17894e+07	5.23728e+07	0.230621	0.192178	1.26519	0	0	0.016951	0.0985265	0.016951	0.0985265
NMAPSQQSPVR	sp|Q9NYB9|ABI2_HUMAN	Q9NYB9	ABI2	Abl interactor 2 OS=Homo sapiens OX=9606 GN=ABI2 PE=1 SV=1	42.93	0.000216567	35.9862	[8] Phospho (ST)	1	MAPSQQS*PVRTAS	227	sp|Q9NYB9|ABI2_HUMAN	457803	634835	669313	197470	459253	1.76941e+06	634835	459253	0.193217	1.04144	-0.467094	0	0	0.914685	0.953113	0.914685	0.953113
TLEPVRPPVVPNDYVPSPTR	sp|Q9NYB9|ABI2_HUMAN	Q9NYB9	ABI2	Abl interactor 2 OS=Homo sapiens OX=9606 GN=ABI2 PE=1 SV=1	30.25	0.000954198	93.8686	[17] Phospho (ST)	1	PNDYVPS*PTRNMA	216	sp|Q9NYB9|ABI2_HUMAN	66730.7	61873.5	64568.7	40527.7	95205.3	60599.4	64568.7	60599.4	0.0377917	0.422634	-0.0915329	0	0	0.874777	0.929743	0.874777	0.929743
TTPPTQKPPSPPMSGK	sp|Q9NYB9|ABI2_HUMAN	Q9NYB9	ABI2	Abl interactor 2 OS=Homo sapiens OX=9606 GN=ABI2 PE=1 SV=1	63.61	0.000180766	54.1894	[10] Phospho (ST)	1	PTQKPPS*PPMSGK	183	sp|Q9NYB9|ABI2_HUMAN	6.44367e+06	4.63909e+06	5.25669e+06	5.62772e+06	6.50164e+06	6.879e+06	5.25669e+06	6.50164e+06	0.168391	0.1013	0.306649	0	0	0.439151	0.61944	0.439151	0.61944
TTPPTQKPPSPPMSGK	sp|Q9NYB9|ABI2_HUMAN	Q9NYB9	ABI2	Abl interactor 2 OS=Homo sapiens OX=9606 GN=ABI2 PE=1 SV=1	35.01	0.000534188	42.6783	[10] Phospho (ST)|[13] Oxidation (M)	2	PTQKPPS*PPMSGK,KPPSPPM*SGKGTL	183186	sp|Q9NYB9|ABI2_HUMAN	2.27826e+06	1.482e+06	1.31754e+06	3.39833e+06	4.88373e+06	3.97682e+06	1.482e+06	3.97682e+06	0.303568	0.18323	1.42407	0	0	0.00950812	0.0730164	0.00950812	0.0730164
TTPPTQKPPSPPMSGK	sp|Q9NYB9|ABI2_HUMAN	Q9NYB9	ABI2	Abl interactor 2 OS=Homo sapiens OX=9606 GN=ABI2 PE=1 SV=1	19.94	0.001472	58.8145	[2] Phospho (ST)|[10] Phospho (ST)	2	GGLPRTT*PPTQKP,PTQKPPS*PPMSGK	175183	sp|Q9NYB9|ABI2_HUMAN	28387	27156.3	12073.3	19944.9	32580.6	8239.93	27156.3	19944.9	0.403051	0.600998	-0.445269	0	0	0.693548	0.814545	0.693548	0.814545
AGGKPSQSPSQEAAGEAVLGAK	sp|P00519|ABL1_HUMAN	P00519	ABL1	Tyrosine-protein kinase ABL1 OS=Homo sapiens OX=9606 GN=ABL1 PE=1 SV=4	73.85	0.000232504	64.4158	[8] Phospho (ST)	1	GGKPSQS*PSQEAA	917	sp|P00519|ABL1_HUMAN	33622.6	38157.4	27020.7	30271.9	4899.53	77137	33622.6	30271.9	0.170046	0.97894	-0.151451	0	0	0.621777	0.763773	0.621777	0.763773
SCSASCVPHGAK	sp|P00519|ABL1_HUMAN	P00519	ABL1	Tyrosine-protein kinase ABL1 OS=Homo sapiens OX=9606 GN=ABL1 PE=1 SV=4	47.39	0.000120671	24.5837	[3] Phospho (ST)	1	RFLRSCS*ASCVPH	718	sp|P00519|ABL1_HUMAN	64.3053	35393	64.3053	11140.5	64.3053	785457	64.3053	11140.5	1.72264	1.69564	7.43667	0.666667	0.333333	0.383494	0.571814	0.383494	0.571814
AGRPVMPPPQVPLPTSSISPAK	sp|P42684|ABL2_HUMAN	P42684	ABL2	Tyrosine-protein kinase ABL2 OS=Homo sapiens OX=9606 GN=ABL2 PE=1 SV=1	16.59	0.00150539	90.2019	[6] Oxidation (M)|[19] Phospho (ST)	2	KAGRPVM*PPPQVP,LPTSSIS*PAKMAN	10411054	sp|P42684|ABL2_HUMAN	64.3053	64.3053	4426.85	64.3053	64.3053	14847.2	64.3053	64.3053	1.6587	1.70974	0	0.666667	0.666667	0.843331	0.911507	0.843331	0.911507
DKSPSSLLEDAK	sp|P42684|ABL2_HUMAN	P42684	ABL2	Tyrosine-protein kinase ABL2 OS=Homo sapiens OX=9606 GN=ABL2 PE=1 SV=1	54.99	0.000145497	72.6437	[3] Phospho (ST)	1	RKQRDKS*PSSLLE	631	sp|P42684|ABL2_HUMAN	1.12485e+06	995507	971992	978157	657562	956706	995507	956706	0.0798483	0.207402	-0.057356	0	0	0.379913	0.568756	0.379913	0.568756
GAQASSGSPALPR	sp|P42684|ABL2_HUMAN	P42684	ABL2	Tyrosine-protein kinase ABL2 OS=Homo sapiens OX=9606 GN=ABL2 PE=1 SV=1	54.22	0.000142939	45.9544	[8] Phospho (ST)	1	AQASSGS*PALPRK	620	sp|P42684|ABL2_HUMAN	1.10496e+06	1.12995e+06	1.01538e+06	976551	706978	623233	1.10496e+06	706978	0.0556036	0.240108	-0.644252	0	0	0.125335	0.299297	0.125335	0.299297
TVSTSSQPEENVDR	sp|P42684|ABL2_HUMAN	P42684	ABL2	Tyrosine-protein kinase ABL2 OS=Homo sapiens OX=9606 GN=ABL2 PE=1 SV=1	73.9	0.000232775	37.8679	[3] Phospho (ST)	1	QLERTVS*TSSQPE	817	sp|P42684|ABL2_HUMAN	3898.65	8550.42	2275.61	3723.28	3234.72	2966.3	3898.65	3234.72	0.66357	0.116013	-0.269333	0	0	0.521915	0.68624	0.521915	0.68624
TVSTSSQPEENVDR	sp|P42684|ABL2_HUMAN	P42684	ABL2	Tyrosine-protein kinase ABL2 OS=Homo sapiens OX=9606 GN=ABL2 PE=1 SV=1	84.91	0.000307977	36.9496	[6] Phospho (ST)	1	RTVSTSS*QPEENV	820	sp|P42684|ABL2_HUMAN	23488.7	72917.6	78725.1	6346.85	41500.7	21405.3	72917.6	21405.3	0.519955	0.764024	-1.7683	0	0.333333	0.128091	0.303213	0.128091	0.303213
VPVLISPTLK	sp|P42684|ABL2_HUMAN	P42684	ABL2	Tyrosine-protein kinase ABL2 OS=Homo sapiens OX=9606 GN=ABL2 PE=1 SV=1	38.57	0.00048605	95.8266	[6] Phospho (ST)	1	KVPVLIS*PTLKHT	936	sp|P42684|ABL2_HUMAN	142300	160538	142648	123406	6364.66	18210.2	142648	18210.2	0.070241	1.30612	-2.96965	0	0	0.0557691	0.190444	0.0557691	0.190444
DCLCQLCAQPMSSSPK	sp|O14639|ABLM1_HUMAN	O14639	ABLIM1	Actin-binding LIM protein 1 OS=Homo sapiens OX=9606 GN=ABLIM1 PE=1 SV=3	94.98	0	79.9146	[14] Phospho (ST)	1	AQPMSSS*PKETTF	216	sp|O14639|ABLM1_HUMAN	104180	90870.8	111502	42570.8	27065	303804	104180	42570.8	0.10236	1.24914	-1.29114	0	0.166667	0.593261	0.741868	0.593261	0.741868
ERSSLLASR	sp|O14639|ABLM1_HUMAN	O14639	ABLIM1	Actin-binding LIM protein 1 OS=Homo sapiens OX=9606 GN=ABLIM1 PE=1 SV=3	28.54	0.000994188	37.9921	[4] Phospho (ST)	1	ESRERSS*LLASRY	632	sp|O14639|ABLM1_HUMAN	64.3053	64.3053	64.3053	64.3053	684.389	64.3053	64.3053	64.3053	0	1.32105	0	1	0.666667	0.297048	0.494952	0.297048	0.494952
GVSMPNMLEPK	sp|O14639|ABLM1_HUMAN	O14639	ABLIM1	Actin-binding LIM protein 1 OS=Homo sapiens OX=9606 GN=ABLIM1 PE=1 SV=3	31.54	0.000900901	93.5796	[3] Phospho (ST)	1	RMDRGVS*MPNMLE	706	sp|O14639|ABLM1_HUMAN	64.3053	64.3053	64.3053	64.3053	129.82	64.3053	64.3053	64.3053	0	0.439093	0	1	0.666667	0.398355	0.58564	0.398355	0.58564
GVSMPNMLEPK	sp|O14639|ABLM1_HUMAN	O14639	ABLIM1	Actin-binding LIM protein 1 OS=Homo sapiens OX=9606 GN=ABLIM1 PE=1 SV=3	13.72	0.00177773	54.7723	[3] Phospho (ST)|[4] Oxidation (M)|[7] Oxidation (M)	3	RMDRGVS*MPNMLE,MDRGVSM*PNMLEP,GVSMPNM*LEPKIF	706707710	sp|O14639|ABLM1_HUMAN	748.269	1586.31	64.3053	946.386	64.3053	8788.11	748.269	946.386	0.95332	1.47029	0.338871	0.333333	0.333333	0.673858	0.801161	0.673858	0.801161
LRPTRTSSESIYSR	sp|O14639|ABLM1_HUMAN	O14639	ABLIM1	Actin-binding LIM protein 1 OS=Homo sapiens OX=9606 GN=ABLIM1 PE=1 SV=3	11.78	0.00183527	42.2577	[7] Phospho (ST)	1	LRPTRTS*SESIYS	352	sp|O14639|ABLM1_HUMAN	53220.1	33845.2	36677.3	58020.5	65764.3	58535.5	36677.3	58535.5	0.253707	0.0712459	0.674424	0	0	0.096786	0.258343	0.096786	0.258343
NGLHRPVSTDFAQYNSYGDVSGGVR	sp|O14639|ABLM1_HUMAN	O14639	ABLIM1	Actin-binding LIM protein 1 OS=Homo sapiens OX=9606 GN=ABLIM1 PE=1 SV=3	63.51	0.000180375	82.0196	[16] Phospho (ST)	1	DFAQYNS*YGDVSG	677	sp|O14639|ABLM1_HUMAN	1.18419e+06	955063	1.15965e+06	2.1725e+06	889367	1.27278e+06	1.15965e+06	1.27278e+06	0.114404	0.455852	0.13429	0	0	0.48316	0.654045	0.48316	0.654045
NGLHRPVSTDFAQYNSYGDVSGGVR	sp|O14639|ABLM1_HUMAN	O14639	ABLIM1	Actin-binding LIM protein 1 OS=Homo sapiens OX=9606 GN=ABLIM1 PE=1 SV=3	83.31	0.000294898	85.1633	[9] Phospho (ST)	1	LHRPVST*DFAQYN	670	sp|O14639|ABLM1_HUMAN	3.84383e+06	4.04465e+06	3.80326e+06	4.65626e+06	4.62595e+06	3.74531e+06	3.84383e+06	4.62595e+06	0.0331669	0.11915	0.267205	0	0	0.575658	0.727838	0.575658	0.727838
PGSSIPGSPGHTIYAK	sp|O14639|ABLM1_HUMAN	O14639	ABLIM1	Actin-binding LIM protein 1 OS=Homo sapiens OX=9606 GN=ABLIM1 PE=1 SV=3	57.22	0.000153988	66.5951	[8] Phospho (ST)	1	GSSIPGS*PGHTIY	367	sp|O14639|ABLM1_HUMAN	152431	78262.1	80684.3	31965.5	72635.8	78166.7	80684.3	72635.8	0.406	0.414126	-0.151608	0	0	0.161383	0.347987	0.161383	0.347987
RRSSGREEDDEELLR	sp|O14639|ABLM1_HUMAN	O14639	ABLIM1	Actin-binding LIM protein 1 OS=Homo sapiens OX=9606 GN=ABLIM1 PE=1 SV=3	26.03	0.00115498	48.6195	[3] Phospho (ST)|[4] Phospho (ST)	2	PDMKRRS*SGREED,DMKRRSS*GREEDD	586587	sp|O14639|ABLM1_HUMAN	163050	220268	85978.8	70444.2	235474	215210	163050	215210	0.430785	0.518121	0.400431	0	0	0.915335	0.953443	0.915335	0.953443
RSSGREEDDEELLR	sp|O14639|ABLM1_HUMAN	O14639	ABLIM1	Actin-binding LIM protein 1 OS=Homo sapiens OX=9606 GN=ABLIM1 PE=1 SV=3	91.08	0	48.8447	[3] Phospho (ST)	1	DMKRRSS*GREEDD	587	sp|O14639|ABLM1_HUMAN	2.87092e+06	1.76625e+06	1.56101e+06	1.75435e+06	2.04e+06	2.95194e+06	1.76625e+06	2.04e+06	0.341008	0.27815	0.207878	0	0	0.726112	0.837155	0.726112	0.837155
SSGREEDDEELLR	sp|O14639|ABLM1_HUMAN	O14639	ABLIM1	Actin-binding LIM protein 1 OS=Homo sapiens OX=9606 GN=ABLIM1 PE=1 SV=3	118.9	0	58.6882	[2] Phospho (ST)	1	DMKRRSS*GREEDD	587	sp|O14639|ABLM1_HUMAN	151642	162619	138039	149985	181287	208616	151642	181287	0.0816743	0.163022	0.257608	0	0.222222	0.397932	0.58516	0.397932	0.58516
STSQGSINSPVYSR	sp|O14639|ABLM1_HUMAN	O14639	ABLIM1	Actin-binding LIM protein 1 OS=Homo sapiens OX=9606 GN=ABLIM1 PE=1 SV=3	82.32	0.000288184	56.1252	[3] Phospho (ST)	1	MIHRSTS*QGSINS	452	sp|O14639|ABLM1_HUMAN	447428	597875	657669	808935	990162	711317	597875	808935	0.190835	0.169091	0.436179	0	0	0.110212	0.27765	0.110212	0.27765
STSQGSINSPVYSR	sp|O14639|ABLM1_HUMAN	O14639	ABLIM1	Actin-binding LIM protein 1 OS=Homo sapiens OX=9606 GN=ABLIM1 PE=1 SV=3	61.43	0.000170736	56.6071	[3] Phospho (ST)|[6] Phospho (ST)	2	MIHRSTS*QGSINS,RSTSQGS*INSPVY	452455	sp|O14639|ABLM1_HUMAN	164538	134975	181123	264636	233172	156774	164538	233172	0.145907	0.254218	0.502971	0	0	0.240262	0.441034	0.240262	0.441034
STSQGSINSPVYSR	sp|O14639|ABLM1_HUMAN	O14639	ABLIM1	Actin-binding LIM protein 1 OS=Homo sapiens OX=9606 GN=ABLIM1 PE=1 SV=3	24.36	0.00132487	53.6122	[6] Phospho (ST)	1	RSTSQGS*INSPVY	455	sp|O14639|ABLM1_HUMAN	2890.23	2244.31	3043.34	203.055	1715.2	25624.1	2890.23	1715.2	0.155574	1.55329	-0.752812	0	0.333333	0.832826	0.905956	0.832826	0.905956
STSQGSINSPVYSR	sp|O14639|ABLM1_HUMAN	O14639	ABLIM1	Actin-binding LIM protein 1 OS=Homo sapiens OX=9606 GN=ABLIM1 PE=1 SV=3	63.59	0.000180701	47.8717	[9] Phospho (ST)	1	SQGSINS*PVYSRH	458	sp|O14639|ABLM1_HUMAN	93904.4	52471	49345.2	221265	132213	97650.7	52471	132213	0.381253	0.424117	1.33327	0	0	0.0414667	0.161011	0.0414667	0.161011
TASLPGYGR	sp|O14639|ABLM1_HUMAN	O14639	ABLIM1	Actin-binding LIM protein 1 OS=Homo sapiens OX=9606 GN=ABLIM1 PE=1 SV=3	27.18	0.00103665	56.1252	[3] Phospho (ST)	1	PSSKTAS*LPGYGR	655	sp|O14639|ABLM1_HUMAN	153016	199495	213321	130881	121500	68568.6	199495	121500	0.167496	0.314041	-0.71539	0	0	0.0591395	0.197025	0.0591395	0.197025
TLSPTPSAEGYQDVR	sp|O14639|ABLM1_HUMAN	O14639	ABLIM1	Actin-binding LIM protein 1 OS=Homo sapiens OX=9606 GN=ABLIM1 PE=1 SV=3	130.01	0	70.0776	[3] Phospho (ST)	1	ESPRTLS*PTPSAE	431	sp|O14639|ABLM1_HUMAN	1.36756e+06	1.19134e+06	1.22878e+06	2.16332e+06	2.19003e+06	3.10007e+06	1.22878e+06	2.19003e+06	0.0735323	0.214649	0.833724	0	0	0.0156976	0.0946434	0.0156976	0.0946434
TLSPTPSAEGYQDVR	sp|O14639|ABLM1_HUMAN	O14639	ABLIM1	Actin-binding LIM protein 1 OS=Homo sapiens OX=9606 GN=ABLIM1 PE=1 SV=3	62.34	0.00017452	69.9907	[3] Phospho (ST)|[7] Phospho (ST)	2	ESPRTLS*PTPSAE,TLSPTPS*AEGYQD	431435	sp|O14639|ABLM1_HUMAN	90617.8	89275.2	123931	63918.7	71176.6	33123.9	90617.8	63918.7	0.193853	0.360301	-0.503557	0	0	0.0642162	0.204718	0.0642162	0.204718
TSSESIYSR	sp|O14639|ABLM1_HUMAN	O14639	ABLIM1	Actin-binding LIM protein 1 OS=Homo sapiens OX=9606 GN=ABLIM1 PE=1 SV=3	40.06	0.000403307	37.7862	[2] Phospho (ST)	1	LRPTRTS*SESIYS	352	sp|O14639|ABLM1_HUMAN	60738.3	66046.6	39482.7	32635.6	67412.1	84932.6	60738.3	67412.1	0.253636	0.431702	0.150402	0	0	0.870292	0.927324	0.870292	0.927324
TSSESIYSRPGSSIPGSPGHTIYAK	sp|O14639|ABLM1_HUMAN	O14639	ABLIM1	Actin-binding LIM protein 1 OS=Homo sapiens OX=9606 GN=ABLIM1 PE=1 SV=3	15.65	0.00165955	82.0543	[13] Phospho (ST)|[17] Phospho (ST)	2	YSRPGSS*IPGSPG,GSSIPGS*PGHTIY	363367	sp|O14639|ABLM1_HUMAN	695567	653296	675759	646201	421126	341308	675759	421126	0.0313388	0.336727	-0.682257	0	0	0.134295	0.311526	0.134295	0.311526
TSSESIYSRPGSSIPGSPGHTIYAK	sp|O14639|ABLM1_HUMAN	O14639	ABLIM1	Actin-binding LIM protein 1 OS=Homo sapiens OX=9606 GN=ABLIM1 PE=1 SV=3	20.78	0.00142829	78.1012	[2] Phospho (ST)	1	LRPTRTS*SESIYS	352	sp|O14639|ABLM1_HUMAN	881031	644072	826876	1.37838e+06	1.63134e+06	1.81263e+06	826876	1.63134e+06	0.158373	0.135685	0.980315	0	0	0.0111801	0.0793482	0.0111801	0.0793482
YDSPINSASHIPSSK	sp|O14639|ABLM1_HUMAN	O14639	ABLIM1	Actin-binding LIM protein 1 OS=Homo sapiens OX=9606 GN=ABLIM1 PE=1 SV=3	99.24	0	60.0501	[3] Phospho (ST)	1	LASRYDS*PINSAS	640	sp|O14639|ABLM1_HUMAN	34153.1	37511.4	20071.1	66567.5	51223.8	102611	34153.1	66567.5	0.302608	0.359061	0.962802	0	0.166667	0.0253944	0.122333	0.0253944	0.122333
TNSPDLDTQSLSHSSGTDRDPLQR	sp|Q6H8Q1|ABLM2_HUMAN	Q6H8Q1	ABLIM2	Actin-binding LIM protein 2 OS=Homo sapiens OX=9606 GN=ABLIM2 PE=1 SV=2	19.57	0.00152594	72.321	[3] Phospho (ST)	1	ADTRTNS*PDLDTQ	476	sp|Q6H8Q1|ABLM2_HUMAN	261127	150521	187990	178535	174608	30212.8	187990	174608	0.281435	0.661446	-0.106532	0	0	0.254142	0.456419	0.254142	0.456419
TSSESIISVPASSTSGSPSR	sp|Q6H8Q1|ABLM2_HUMAN	Q6H8Q1	ABLIM2	Actin-binding LIM protein 2 OS=Homo sapiens OX=9606 GN=ABLIM2 PE=1 SV=2	35.07	0.000534712	81.7728	[17] Phospho (ST)	1	ASSTSGS*PSRVIY	294	sp|Q6H8Q1|ABLM2_HUMAN	277771	95390.4	69666.4	13310.9	492244	110897	95390.4	110897	0.768616	1.23168	0.217302	0	0.333333	0.759589	0.859599	0.759589	0.859599
TSSPSSTGSVSLGR	sp|Q6H8Q1|ABLM2_HUMAN	Q6H8Q1	ABLIM2	Actin-binding LIM protein 2 OS=Homo sapiens OX=9606 GN=ABLIM2 PE=1 SV=2	40.67	0.000409333	49.2901	[3] Phospho (ST)	1	KQCRTSS*PSSTGS	364	sp|Q6H8Q1|ABLM2_HUMAN	657868	470859	483321	661176	970560	852127	483321	852127	0.194581	0.18854	0.818087	0	0	0.0879835	0.244631	0.0879835	0.244631
DMSLKR	sp|Q12979|ABR_HUMAN	Q12979	ABR	Active breakpoint cluster region-related protein OS=Homo sapiens OX=9606 GN=ABR PE=2 SV=2	23.85	0.00130809	30.7084	[3] Phospho (ST)	1	FTSRDMS*LKRTPS	632	sp|Q12979|ABR_HUMAN	7752.15	18913.6	22081.7	987.497	1231.95	76408.7	18913.6	1231.95	0.463236	1.65872	-3.9404	0	0	0.378215	0.567691	0.378215	0.567691
ASKMSSPETDEEIEK	sp|Q6UWZ7|ABRX1_HUMAN	Q6UWZ7	ABRAXAS1	BRCA1-A complex subunit Abraxas 1 OS=Homo sapiens OX=9606 GN=ABRAXAS1 PE=1 SV=2	25.61	0.00121663	44.2071	[5] Phospho (ST)|[6] Phospho (ST)|[9] Phospho (ST)	3	DKASKMS*SPETDE,KASKMSS*PETDEE,KMSSPET*DEEIEK	386387390	sp|Q6UWZ7|ABRX1_HUMAN	64.3053	73584.2	38023.4	64.3053	16917.8	64.3053	38023.4	64.3053	0.98771	1.71245	-9.20773	0.333333	0.666667	0.332494	0.526987	0.332494	0.526987
GFGEYSRSPTF	sp|Q6UWZ7|ABRX1_HUMAN	Q6UWZ7	ABRAXAS1	BRCA1-A complex subunit Abraxas 1 OS=Homo sapiens OX=9606 GN=ABRAXAS1 PE=1 SV=2	68.32	0.000201167	85.2467	[8] Phospho (ST)	1	FGEYSRS*PTF	406	sp|Q6UWZ7|ABRX1_HUMAN	172283	225017	245424	248766	157495	205050	225017	205050	0.176168	0.224022	-0.134065	0.166667	0.166667	0.804324	0.887744	0.804324	0.887744
QMPSESLDPAFSPR	sp|Q15018|ABRX2_HUMAN	Q15018	ABRAXAS2	BRISC complex subunit Abraxas 2 OS=Homo sapiens OX=9606 GN=ABRAXAS2 PE=1 SV=2	35.71	0.000452817	82.6549	[2] Oxidation (M)|[12] Phospho (ST)	2	AVLSRQM*PSESLD,SLDPAFS*PRMPSS	270280	sp|Q15018|ABRX2_HUMAN	13131.4	2189.68	22934.8	9365.23	397.624	104338	13131.4	9365.23	0.813817	1.51435	-0.487635	0	0	0.910367	0.950612	0.910367	0.950612
AATEQEPLEGTEQTLDAEEEQEESEEAACGSK	sp|Q9ULW3|ABT1_HUMAN	Q9ULW3	ABT1	Activator of basal transcription 1 OS=Homo sapiens OX=9606 GN=ABT1 PE=1 SV=1	86.89	0	85.2916	[24] Phospho (ST)	1	EEEQEES*EEAACG	32	sp|Q9ULW3|ABT1_HUMAN	13767.4	64.3053	64.3053	144665	64.3053	64.3053	64.3053	64.3053	1.70801	1.72974	0	0.666667	0.666667	0.778247	0.871054	0.778247	0.871054
IFDEVMGCFSDSPPQSPTFPEAGHTSLYDEDKVPR	sp|Q13085|ACACA_HUMAN	Q13085	ACACA	Acetyl-CoA carboxylase 1 OS=Homo sapiens OX=9606 GN=ACACA PE=1 SV=2	51.18	0.000133067	97.1578	[10] Phospho (ST)|[16] Phospho (ST)	2	EVMGCFS*DSPPQS,SDSPPQS*PTFPEA	12571263	sp|Q13085|ACACA_HUMAN	335003	509498	565008	72130	472135	150573	509498	150573	0.255455	0.915143	-1.75861	0	0	0.105957	0.271731	0.105957	0.271731
IFDEVMGCFSDSPPQSPTFPEAGHTSLYDEDKVPR	sp|Q13085|ACACA_HUMAN	Q13085	ACACA	Acetyl-CoA carboxylase 1 OS=Homo sapiens OX=9606 GN=ACACA PE=1 SV=2	19.18	0.00157629	96.4278	[12] Phospho (ST)	1	MGCFSDS*PPQSPT	1259	sp|Q13085|ACACA_HUMAN	420085	404154	379392	219289	176227	301004	404154	219289	0.0511092	0.272978	-0.882073	0	0	0.0376776	0.153224	0.0376776	0.153224
IFDEVMGCFSDSPPQSPTFPEAGHTSLYDEDKVPR	sp|Q13085|ACACA_HUMAN	Q13085	ACACA	Acetyl-CoA carboxylase 1 OS=Homo sapiens OX=9606 GN=ACACA PE=1 SV=2	56.21	0.000149903	97.1578	[12] Phospho (ST)|[16] Phospho (ST)	2	MGCFSDS*PPQSPT,SDSPPQS*PTFPEA	12591263	sp|Q13085|ACACA_HUMAN	698447	970849	850640	55156.5	820593	602559	850640	602559	0.16252	0.800277	-0.497447	0	0	0.223621	0.422471	0.223621	0.422471
IFDEVMGCFSDSPPQSPTFPEAGHTSLYDEDKVPR	sp|Q13085|ACACA_HUMAN	Q13085	ACACA	Acetyl-CoA carboxylase 1 OS=Homo sapiens OX=9606 GN=ACACA PE=1 SV=2	36.34	0.000459982	95.238	[6] Oxidation (M)|[10] Phospho (ST)|[16] Phospho (ST)	3	RIFDEVM*GCFSDS,EVMGCFS*DSPPQS,SDSPPQS*PTFPEA	125312571263	sp|Q13085|ACACA_HUMAN	564859	667095	752305	246135	867849	1.02986e+06	667095	867849	0.141894	0.578946	0.379552	0	0	0.847804	0.914087	0.847804	0.914087
SSMSGLHLVK	sp|Q13085|ACACA_HUMAN	Q13085	ACACA	Acetyl-CoA carboxylase 1 OS=Homo sapiens OX=9606 GN=ACACA PE=1 SV=2	36.4	0.000460575	57.7289	[3] Oxidation (M)|[4] Phospho (ST)	2	LHIRSSM*SGLHLV,HIRSSMS*GLHLVK	79,80	sp|Q13085|ACACA_HUMAN	13133.8	12728.8	12203.6	298188	123779	155463	12728.8	155463	0.0367575	0.482705	3.6104	0	0	0.000110884	0.0102407	0.000110884	0.0102407
SSMSGLHLVK	sp|Q13085|ACACA_HUMAN	Q13085	ACACA	Acetyl-CoA carboxylase 1 OS=Homo sapiens OX=9606 GN=ACACA PE=1 SV=2	45.33	0.000115022	76.4136	[4] Phospho (ST)	1	HIRSSMS*GLHLVK	80	sp|Q13085|ACACA_HUMAN	74119.8	81799.1	71807.6	294521	107153	233740	74119.8	233740	0.0689051	0.451316	1.65697	0	0	0.0239635	0.118382	0.0239635	0.118382
LRDSLGR	sp|Q9H845|ACAD9_HUMAN	Q9H845	ACAD9	Acyl-CoA dehydrogenase family member 9, mitochondrial OS=Homo sapiens OX=9606 GN=ACAD9 PE=1 SV=1	27.21	0.00103742	30.5294	[4] Phospho (ST)	1	GRRLRDS*LGRTVD	474	sp|Q9H845|ACAD9_HUMAN	37554.7	49841.4	43382.1	30714.9	2854.3	51547.7	43382.1	30714.9	0.140989	0.861089	-0.498161	0	0	0.262667	0.465497	0.262667	0.465497
TSPPVRAFAK	sp|Q9H845|ACAD9_HUMAN	Q9H845	ACAD9	Acyl-CoA dehydrogenase family member 9, mitochondrial OS=Homo sapiens OX=9606 GN=ACAD9 PE=1 SV=1	10.61	0.00180239	48.5774	[2] Phospho (ST)	1	RRLLRTS*PPVRAF	33	sp|Q9H845|ACAD9_HUMAN	327994	192580	160411	471411	448571	710127	192580	471411	0.391789	0.266609	1.29153	0	0	0.0183095	0.10267	0.0183095	0.10267
FVDKYSISLSPPEQQKK	sp|Q15057|ACAP2_HUMAN	Q15057	ACAP2	Arf-GAP with coiled-coil, ANK repeat and PH domain-containing protein 2 OS=Homo sapiens OX=9606 GN=ACAP2 PE=1 SV=3	19.34	0.00158298	83.8892	[10] Phospho (ST)	1	KYSISLS*PPEQQK	521	sp|Q15057|ACAP2_HUMAN	178120	220280	214978	153471	114164	212232	214978	153471	0.112315	0.308551	-0.486221	0	0	0.281844	0.48581	0.281844	0.48581
KSSPSTGSLDSGNESK	sp|Q15057|ACAP2_HUMAN	Q15057	ACAP2	Arf-GAP with coiled-coil, ANK repeat and PH domain-containing protein 2 OS=Homo sapiens OX=9606 GN=ACAP2 PE=1 SV=3	108.83	0	24.5059	[3] Phospho (ST)	1	KLDKKSS*PSTGSL	379	sp|Q15057|ACAP2_HUMAN	753600	1.01459e+06	843394	334102	277173	37975.1	843394	277173	0.152315	0.726075	-1.60542	0	0	0.0324294	0.140776	0.0324294	0.140776
SSPSTGSLDSGNESK	sp|Q15057|ACAP2_HUMAN	Q15057	ACAP2	Arf-GAP with coiled-coil, ANK repeat and PH domain-containing protein 2 OS=Homo sapiens OX=9606 GN=ACAP2 PE=1 SV=3	64.5	0.000185219	29.253	[7] Phospho (ST)	1	SSPSTGS*LDSGNE	384	sp|Q15057|ACAP2_HUMAN	515240	700413	721167	500682	487697	986760	700413	500682	0.175613	0.43206	-0.48431	0	0	0.927417	0.960866	0.927417	0.960866
YSISLSPPEQQK	sp|Q15057|ACAP2_HUMAN	Q15057	ACAP2	Arf-GAP with coiled-coil, ANK repeat and PH domain-containing protein 2 OS=Homo sapiens OX=9606 GN=ACAP2 PE=1 SV=3	43.59	0.000220459	83.8397	[6] Phospho (ST)	1	KYSISLS*PPEQQK	521	sp|Q15057|ACAP2_HUMAN	885819	738557	693668	840575	523449	723888	738557	723888	0.130089	0.230464	-0.0289428	0	0	0.596599	0.744479	0.596599	0.744479
YSISLSPPEQQKK	sp|Q15057|ACAP2_HUMAN	Q15057	ACAP2	Arf-GAP with coiled-coil, ANK repeat and PH domain-containing protein 2 OS=Homo sapiens OX=9606 GN=ACAP2 PE=1 SV=3	27.76	0.00105176	77.3707	[6] Phospho (ST)	1	KYSISLS*PPEQQK	521	sp|Q15057|ACAP2_HUMAN	1.10758e+06	870466	893645	1.32122e+06	812148	2.351e+06	893645	1.32122e+06	0.13656	0.524469	0.564099	0	0	0.299247	0.496602	0.299247	0.496602
EPAPPSPESHSPR	sp|Q8NC06|ACBD4_HUMAN	Q8NC06	ACBD4	Acyl-CoA-binding domain-containing protein 4 OS=Homo sapiens OX=9606 GN=ACBD4 PE=1 SV=2	47.04	0.000119603	36.6731	[6] Phospho (ST)	1	KEPAPPS*PESHSP	166	sp|Q8NC06|ACBD4_HUMAN	318800	289295	256446	195183	102116	36861.7	289295	102116	0.108237	0.714328	-1.50234	0	0	0.0430653	0.164419	0.0430653	0.164419
AESSDSGAESEEEEAQEEVK	sp|Q5T8D3|ACBD5_HUMAN	Q5T8D3	ACBD5	Acyl-CoA-binding domain-containing protein 5 OS=Homo sapiens OX=9606 GN=ACBD5 PE=1 SV=1	197.68	0	55.2178	[6] Phospho (ST)|[10] Phospho (ST)	2	KAESSDS*GAESEE,SDSGAES*EEEEAQ	196200	sp|Q5T8D3|ACBD5_HUMAN	2.15345e+06	2.18941e+06	2.77364e+06	598473	170469	4.59406e+06	2.18941e+06	598473	0.146765	1.3648	-1.87118	0	0	0.233082	0.433516	0.233082	0.433516
AESSDSGAESEEEEAQEEVKGAEQSDNDKK	sp|Q5T8D3|ACBD5_HUMAN	Q5T8D3	ACBD5	Acyl-CoA-binding domain-containing protein 5 OS=Homo sapiens OX=9606 GN=ACBD5 PE=1 SV=1	62.63	0.00017584	68.4331	[6] Phospho (ST)|[10] Phospho (ST)	2	KAESSDS*GAESEE,SDSGAES*EEEEAQ	196200	sp|Q5T8D3|ACBD5_HUMAN	1.2388e+06	1.51051e+06	1.51712e+06	454741	259207	1.49531e+06	1.51051e+06	454741	0.111675	0.902274	-1.73192	0	0	0.0992456	0.261473	0.0992456	0.261473
MQHLSEGTK	sp|Q5T8D3|ACBD5_HUMAN	Q5T8D3	ACBD5	Acyl-CoA-binding domain-containing protein 5 OS=Homo sapiens OX=9606 GN=ACBD5 PE=1 SV=1	14.15	0.0017318	19.0659	[1] Oxidation (M)|[5] Phospho (ST)	2	RGRGHRM*QHLSEG,HRMQHLS*EGTKGR	414418	sp|Q5T8D3|ACBD5_HUMAN	9280.75	27083.6	14323.7	11106.9	1396.03	227910	14323.7	11106.9	0.543083	1.59808	-0.366948	0	0	0.996317	0.998155	0.996317	0.998155
SSSQPSPAICSAPATLTPR	sp|Q96AP0|ACD_HUMAN	Q96AP0	ACD	Adrenocortical dysplasia protein homolog OS=Homo sapiens OX=9606 GN=ACD PE=1 SV=3	55.41	0.000146886	83.3132	[6] Phospho (ST)	1	RSSSQPS*PAICSA	402	sp|Q96AP0|ACD_HUMAN	3412.01	7225.86	7161.57	2282.87	4105	15855.6	7161.57	4105	0.368035	0.993563	-0.802893	0	0	0.920787	0.956858	0.920787	0.956858
TPSSPLQSCTPSLSPR	sp|Q96AP0|ACD_HUMAN	Q96AP0	ACD	Adrenocortical dysplasia protein homolog OS=Homo sapiens OX=9606 GN=ACD PE=1 SV=3	45.19	0.000114653	78.3182	[1] Phospho (ST)|[14] Phospho (ST)	2	SPHASRT*PSSPLQ,SCTPSLS*PRSHVP	422435	sp|Q96AP0|ACD_HUMAN	443998	297355	304845	374163	676057	443526	304845	443526	0.23682	0.317575	0.540939	0	0	0.217688	0.4162	0.217688	0.4162
TPSSPLQSCTPSLSPR	sp|Q96AP0|ACD_HUMAN	Q96AP0	ACD	Adrenocortical dysplasia protein homolog OS=Homo sapiens OX=9606 GN=ACD PE=1 SV=3	54.08	0.000142349	82.4863	[14] Phospho (ST)	1	SCTPSLS*PRSHVP	435	sp|Q96AP0|ACD_HUMAN	179540	123597	139005	359649	321217	437673	139005	359649	0.196068	0.159151	1.37145	0	0	0.00437566	0.053243	0.00437566	0.053243
TPSSPLQSCTPSLSPR	sp|Q96AP0|ACD_HUMAN	Q96AP0	ACD	Adrenocortical dysplasia protein homolog OS=Homo sapiens OX=9606 GN=ACD PE=1 SV=3	87.62	0	77.908	[4] Phospho (ST)	1	ASRTPSS*PLQSCT	425	sp|Q96AP0|ACD_HUMAN	608871	424800	552718	717037	1.15431e+06	595334	552718	717037	0.178402	0.357515	0.375505	0	0	0.153577	0.338309	0.153577	0.338309
SGENPYASIDISK	sp|Q9BYF1|ACE2_HUMAN	Q9BYF1	ACE2	Angiotensin-converting enzyme 2 OS=Homo sapiens OX=9606 GN=ACE2 PE=1 SV=2	53.61	0.000140746	65.4916	[6] Phospho (Y)	1	RSGENPY*ASIDIS	781	sp|Q9BYF1|ACE2_HUMAN	1.45242e+06	1.075e+06	1.1472e+06	244142	197471	491927	1.1472e+06	244142	0.16356	0.508584	-2.23232	0	0	0.00330132	0.0473395	0.00330132	0.0473395
AAKLSEGSQPAEEEEDQETPSR	sp|Q9UKV3|ACINU_HUMAN	Q9UKV3	ACIN1	Apoptotic chromatin condensation inducer in the nucleus OS=Homo sapiens OX=9606 GN=ACIN1 PE=1 SV=2	110.59	0	46.5784	[5] Phospho (ST)	1	ARAAKLS*EGSQPA	240	sp|Q9UKV3|ACINU_HUMAN	786248	665466	587685	1.24084e+06	2.70995e+06	1.6389e+06	665466	1.6389e+06	0.147182	0.407792	1.30029	0	0	0.0118678	0.0818512	0.0118678	0.0818512
AAKLSEGSQPAEEEEDQETPSR	sp|Q9UKV3|ACINU_HUMAN	Q9UKV3	ACIN1	Apoptotic chromatin condensation inducer in the nucleus OS=Homo sapiens OX=9606 GN=ACIN1 PE=1 SV=2	189.77	0	47.4642	[5] Phospho (ST)|[8] Phospho (ST)	2	ARAAKLS*EGSQPA,AKLSEGS*QPAEEE	240243	sp|Q9UKV3|ACINU_HUMAN	2.7308e+06	2.38233e+06	3.04521e+06	8.48562e+06	7.24842e+06	6.56371e+06	2.7308e+06	7.24842e+06	0.12193	0.131058	1.40834	0	0	0.00199098	0.0391644	0.00199098	0.0391644
AAKLSEGSQPAEEEEDQETPSR	sp|Q9UKV3|ACINU_HUMAN	Q9UKV3	ACIN1	Apoptotic chromatin condensation inducer in the nucleus OS=Homo sapiens OX=9606 GN=ACIN1 PE=1 SV=2	82.06	0.000285878	46.5232	[8] Phospho (ST)	1	AKLSEGS*QPAEEE	243	sp|Q9UKV3|ACINU_HUMAN	1.53841e+06	2.50592e+06	2.26586e+06	3.94201e+06	5.10323e+06	4.91087e+06	2.26586e+06	4.91087e+06	0.239517	0.133786	1.11592	0	0	0.0109907	0.0785339	0.0109907	0.0785339
AESPAEKVPEESVLPLVQK	sp|Q9UKV3|ACINU_HUMAN	Q9UKV3	ACIN1	Apoptotic chromatin condensation inducer in the nucleus OS=Homo sapiens OX=9606 GN=ACIN1 PE=1 SV=2	126.28	0	94.4032	[3] Phospho (ST)	1	SDTKAES*PAEKVP	490	sp|Q9UKV3|ACINU_HUMAN	4.2745e+06	3.15143e+06	3.1315e+06	5.89968e+06	5.10037e+06	6.50272e+06	3.15143e+06	5.89968e+06	0.185906	0.120574	0.904629	0	0	0.0412151	0.160439	0.0412151	0.160439
ASLVALPEQTASEEETPPPLLTK	sp|Q9UKV3|ACINU_HUMAN	Q9UKV3	ACIN1	Apoptotic chromatin condensation inducer in the nucleus OS=Homo sapiens OX=9606 GN=ACIN1 PE=1 SV=2	40.69	0.00040971	97.5936	[16] Phospho (ST)	1	TASEEET*PPPLLT	414	sp|Q9UKV3|ACINU_HUMAN	457670	385231	391720	292573	571141	179759	391720	292573	0.0973927	0.579188	-0.421028	0	0	0.434618	0.615727	0.434618	0.615727
DPSSGQEVATPPVPQLQVCEPK	sp|Q9UKV3|ACINU_HUMAN	Q9UKV3	ACIN1	Apoptotic chromatin condensation inducer in the nucleus OS=Homo sapiens OX=9606 GN=ACIN1 PE=1 SV=2	30.27	0.000954806	92.4565	[10] Phospho (ST)	1	SGQEVAT*PPVPQL	682	sp|Q9UKV3|ACINU_HUMAN	275707	275406	294670	625543	641239	412856	275707	625543	0.0391468	0.227849	1.18197	0	0	0.0186113	0.103617	0.0186113	0.103617
DSSTSYTETKDPSSGQEVATPPVPQLQVCEPK	sp|Q9UKV3|ACINU_HUMAN	Q9UKV3	ACIN1	Apoptotic chromatin condensation inducer in the nucleus OS=Homo sapiens OX=9606 GN=ACIN1 PE=1 SV=2	23.03	0.0013563	92.5561	[4] Phospho (ST)	1	VSRDSST*SYTETK	666	sp|Q9UKV3|ACINU_HUMAN	297710	226659	227901	706249	546120	257770	227901	546120	0.16218	0.451496	1.26081	0	0	0.0968724	0.258383	0.0968724	0.258383
ELLVSQHTVQLVGGLSPLSSPSDTK	sp|Q9UKV3|ACINU_HUMAN	Q9UKV3	ACIN1	Apoptotic chromatin condensation inducer in the nucleus OS=Homo sapiens OX=9606 GN=ACIN1 PE=1 SV=2	113.61	0	97.0163	[16] Phospho (ST)	1	QLVGGLS*PLSSPS	478	sp|Q9UKV3|ACINU_HUMAN	2.2602e+06	1.94426e+06	1.9625e+06	2.7837e+06	2.7504e+06	341225	1.9625e+06	2.7504e+06	0.0862867	0.715186	0.486948	0	0	0.541785	0.701283	0.541785	0.701283
ELLVSQHTVQLVGGLSPLSSPSDTKAESPAEKVPEESVLPLVQK	sp|Q9UKV3|ACINU_HUMAN	Q9UKV3	ACIN1	Apoptotic chromatin condensation inducer in the nucleus OS=Homo sapiens OX=9606 GN=ACIN1 PE=1 SV=2	31.33	0.000896203	98.3202	[16] Phospho (ST)|[19] Phospho (ST)	2	QLVGGLS*PLSSPS,GGLSPLS*SPSDTK	478481	sp|Q9UKV3|ACINU_HUMAN	1.11562e+06	1.02844e+06	1.3501e+06	471201	1.62504e+06	518732	1.11562e+06	518732	0.14283	0.74901	-1.10479	0	0	0.280104	0.48379	0.280104	0.48379
GVPAGNSDTEGGQPGR	sp|Q9UKV3|ACINU_HUMAN	Q9UKV3	ACIN1	Apoptotic chromatin condensation inducer in the nucleus OS=Homo sapiens OX=9606 GN=ACIN1 PE=1 SV=2	82.71	0.000291121	30.5782	[7] Phospho (ST)	1	GVPAGNS*DTEGGQ	838	sp|Q9UKV3|ACINU_HUMAN	2.43062e+06	2.14907e+06	1.97506e+06	2.23004e+06	2.25112e+06	6.58432e+06	2.14907e+06	2.25112e+06	0.105216	0.67992	0.066933	0	0	0.310607	0.506241	0.310607	0.506241
GVPAGNSDTEGGQPGRK	sp|Q9UKV3|ACINU_HUMAN	Q9UKV3	ACIN1	Apoptotic chromatin condensation inducer in the nucleus OS=Homo sapiens OX=9606 GN=ACIN1 PE=1 SV=2	45.18	0.000114626	24.9932	[7] Phospho (ST)	1	GVPAGNS*DTEGGQ	838	sp|Q9UKV3|ACINU_HUMAN	345832	634041	358353	22736.8	100256	1.82023e+06	358353	100256	0.365193	1.56875	-1.8377	0	0.333333	0.414264	0.599724	0.414264	0.599724
ISEDETER	sp|Q9UKV3|ACINU_HUMAN	Q9UKV3	ACIN1	Apoptotic chromatin condensation inducer in the nucleus OS=Homo sapiens OX=9606 GN=ACIN1 PE=1 SV=2	36.79	0.00046477	23.9001	[2] Phospho (ST)	1	ADDSRIS*EDETER	898	sp|Q9UKV3|ACINU_HUMAN	786373	954777	842335	14584.5	299107	490764	842335	299107	0.0995929	0.893502	-1.49373	0	0	0.0947044	0.255184	0.0947044	0.255184
ISEDETERNGDDGTHDK	sp|Q9UKV3|ACINU_HUMAN	Q9UKV3	ACIN1	Apoptotic chromatin condensation inducer in the nucleus OS=Homo sapiens OX=9606 GN=ACIN1 PE=1 SV=2	42.7	0.000215332	21.1128	[6] Phospho (ST)	1	RISEDET*ERNGDD	902	sp|Q9UKV3|ACINU_HUMAN	111673	33319.9	114968	51242.1	238843	205026	111673	205026	0.533362	0.605859	0.876532	0	0.333333	0.337728	0.531588	0.337728	0.531588
KISVVSATK	sp|Q9UKV3|ACINU_HUMAN	Q9UKV3	ACIN1	Apoptotic chromatin condensation inducer in the nucleus OS=Homo sapiens OX=9606 GN=ACIN1 PE=1 SV=2	44	0.000222593	42.8268	[3] Phospho (ST)	1	SFKRKIS*VVSATK	825	sp|Q9UKV3|ACINU_HUMAN	414127	456084	279225	985535	376532	937908	414127	937908	0.241189	0.441784	1.17937	0	0	0.113269	0.282384	0.113269	0.282384
KKASLVALPEQTASEEETPPPLLTK	sp|Q9UKV3|ACINU_HUMAN	Q9UKV3	ACIN1	Apoptotic chromatin condensation inducer in the nucleus OS=Homo sapiens OX=9606 GN=ACIN1 PE=1 SV=2	43.37	0.000218842	92.9919	[4] Phospho (ST)	1	EDRKKAS*LVALPE	400	sp|Q9UKV3|ACINU_HUMAN	150005	138957	131978	328316	167431	307045	138957	307045	0.0647803	0.326596	1.14381	0	0	0.0517159	0.182612	0.0517159	0.182612
KSLSPGVSR	sp|Q9UKV3|ACINU_HUMAN	Q9UKV3	ACIN1	Apoptotic chromatin condensation inducer in the nucleus OS=Homo sapiens OX=9606 GN=ACIN1 PE=1 SV=2	44.69	0.000226501	29.9202	[4] Phospho (ST)	1	NSRKSLS*PGVSRD	657	sp|Q9UKV3|ACINU_HUMAN	237531	308577	378793	259341	639942	998850	308577	639942	0.229101	0.584481	1.05231	0	0	0.180761	0.372556	0.180761	0.372556
KSSSISEEKGDSDDEKPR	sp|Q9UKV3|ACINU_HUMAN	Q9UKV3	ACIN1	Apoptotic chromatin condensation inducer in the nucleus OS=Homo sapiens OX=9606 GN=ACIN1 PE=1 SV=2	165.26	0	18.6196	[12] Phospho (ST)	1	SEEKGDS*DDEKPR	216	sp|Q9UKV3|ACINU_HUMAN	4.4652e+06	4.07623e+06	6.42412e+06	3.20763e+06	1.05645e+07	2.36504e+07	4.4652e+06	1.05645e+07	0.252257	0.830061	1.24243	0	0	0.274539	0.478081	0.274539	0.478081
KSSSISEEKGDSDDEKPR	sp|Q9UKV3|ACINU_HUMAN	Q9UKV3	ACIN1	Apoptotic chromatin condensation inducer in the nucleus OS=Homo sapiens OX=9606 GN=ACIN1 PE=1 SV=2	98.82	0	19.5895	[4] Phospho (ST)|[12] Phospho (ST)	2	SPRKSSS*ISEEKG,SEEKGDS*DDEKPR	208216	sp|Q9UKV3|ACINU_HUMAN	950835	1.18707e+06	756186	13249.5	1.4009e+06	4.41901e+06	950835	1.4009e+06	0.223671	1.15851	0.559091	0	0	0.625755	0.766264	0.625755	0.766264
LQPERGSPK	sp|Q9UKV3|ACINU_HUMAN	Q9UKV3	ACIN1	Apoptotic chromatin condensation inducer in the nucleus OS=Homo sapiens OX=9606 GN=ACIN1 PE=1 SV=2	12.78	0.00186535	19.0209	[7] Phospho (ST)	1	LQPERGS*PKKCEA	729	sp|Q9UKV3|ACINU_HUMAN	2.7009e+06	2.32425e+06	2.61934e+06	3.8086e+06	2.56737e+06	1.78434e+07	2.61934e+06	3.8086e+06	0.0777641	1.0509	0.540058	0	0	0.189383	0.383086	0.189383	0.383086
LSEGSQPAEEEEDQETPSR	sp|Q9UKV3|ACINU_HUMAN	Q9UKV3	ACIN1	Apoptotic chromatin condensation inducer in the nucleus OS=Homo sapiens OX=9606 GN=ACIN1 PE=1 SV=2	50.86	0.000131996	39.8434	[16] Phospho (ST)	1	EEEDQET*PSRNLR	254	sp|Q9UKV3|ACINU_HUMAN	274353	205867	209210	308981	398070	220003	209210	308981	0.168014	0.288117	0.562561	0	0	0.281572	0.485431	0.281572	0.485431
LSEGSQPAEEEEDQETPSR	sp|Q9UKV3|ACINU_HUMAN	Q9UKV3	ACIN1	Apoptotic chromatin condensation inducer in the nucleus OS=Homo sapiens OX=9606 GN=ACIN1 PE=1 SV=2	107.51	0	48.1591	[2] Phospho (ST)|[5] Phospho (ST)	2	ARAAKLS*EGSQPA,AKLSEGS*QPAEEE	240243	sp|Q9UKV3|ACINU_HUMAN	666906	411995	317316	1.09036e+06	953898	737790	411995	953898	0.388504	0.191707	1.21121	0	0	0.0358952	0.148993	0.0358952	0.148993
LSEGSQPAEEEEDQETPSR	sp|Q9UKV3|ACINU_HUMAN	Q9UKV3	ACIN1	Apoptotic chromatin condensation inducer in the nucleus OS=Homo sapiens OX=9606 GN=ACIN1 PE=1 SV=2	164.31	0	45.0468	[5] Phospho (ST)	1	AKLSEGS*QPAEEE	243	sp|Q9UKV3|ACINU_HUMAN	176009	971520	1.31789e+06	3.8976e+06	5.10461e+06	3.98455e+06	971520	3.98455e+06	0.712428	0.155506	2.0361	0	0	0.0143817	0.0902139	0.0143817	0.0902139
NLKTEEEEEEEEEEEEDDEEEEGDDEGQK	sp|Q9UKV3|ACINU_HUMAN	Q9UKV3	ACIN1	Apoptotic chromatin condensation inducer in the nucleus OS=Homo sapiens OX=9606 GN=ACIN1 PE=1 SV=2	72.35	0.000223514	62.5403	[4] Phospho (ST)	1	ADRNLKT*EEEEEE	269	sp|Q9UKV3|ACINU_HUMAN	1476.25	1903	7594.56	2637.56	6068.38	2.99394e+06	1903	6068.38	0.93383	1.72452	1.67304	0	0	0.234421	0.434908	0.234421	0.434908
NLKTEEEEEEEEEEEEDDEEEEGDDEGQKSR	sp|Q9UKV3|ACINU_HUMAN	Q9UKV3	ACIN1	Apoptotic chromatin condensation inducer in the nucleus OS=Homo sapiens OX=9606 GN=ACIN1 PE=1 SV=2	48.03	0.00012276	53.4563	[30] Phospho (ST)	1	DDEGQKS*REAPIL	295	sp|Q9UKV3|ACINU_HUMAN	5457.07	15451.7	4791.5	41163.5	23006.8	17885.4	5457.07	23006.8	0.697092	0.447217	2.07586	0	0	0.024936	0.121049	0.024936	0.121049
RASHTLLPSHR	sp|Q9UKV3|ACINU_HUMAN	Q9UKV3	ACIN1	Apoptotic chromatin condensation inducer in the nucleus OS=Homo sapiens OX=9606 GN=ACIN1 PE=1 SV=2	91.72	0	31.7909	[3] Phospho (ST)	1	KEGRRAS*HTLLPS	561	sp|Q9UKV3|ACINU_HUMAN	6.98363e+06	5.47745e+06	6.64089e+06	8.7423e+06	4.78954e+06	5.00167e+06	6.64089e+06	5.00167e+06	0.123988	0.359903	-0.408968	0	0	0.797497	0.883252	0.797497	0.883252
RLSQPESAEK	sp|Q9UKV3|ACINU_HUMAN	Q9UKV3	ACIN1	Apoptotic chromatin condensation inducer in the nucleus OS=Homo sapiens OX=9606 GN=ACIN1 PE=1 SV=2	62.99	0.000177809	24.5684	[3] Phospho (ST)	1	VQARRLS*QPESAE	710	sp|Q9UKV3|ACINU_HUMAN	2.36603e+07	2.21042e+07	2.43358e+07	1.02745e+07	2.54089e+07	5.76268e+07	2.36603e+07	2.54089e+07	0.0489757	0.777546	0.102863	0	0.166667	0.906121	0.948221	0.906121	0.948221
RLSQPESAEK	sp|Q9UKV3|ACINU_HUMAN	Q9UKV3	ACIN1	Apoptotic chromatin condensation inducer in the nucleus OS=Homo sapiens OX=9606 GN=ACIN1 PE=1 SV=2	28.69	0.000997391	27.4654	[3] Phospho (ST)|[7] Phospho (ST)	2	VQARRLS*QPESAE,RLSQPES*AEKHVT	710714	sp|Q9UKV3|ACINU_HUMAN	25176.9	31066.6	16770.9	55794.3	47457.6	121113	25176.9	55794.3	0.295201	0.539313	1.14802	0	0	0.02	0.107577	0.02	0.107577
SKSPSPPR	sp|Q9UKV3|ACINU_HUMAN	Q9UKV3	ACIN1	Apoptotic chromatin condensation inducer in the nucleus OS=Homo sapiens OX=9606 GN=ACIN1 PE=1 SV=2	19.52	0.00152468	19.5895	[5] Phospho (ST)	1	EKSKSPS*PPRLTE	388	sp|Q9UKV3|ACINU_HUMAN	79822.3	87084	95222.9	173205	84448.8	410193	87084	173205	0.088176	0.756458	0.992002	0	0	0.135199	0.312711	0.135199	0.312711
SLIPDIKPLAGQEAVVDLHADDSRISEDETER	sp|Q9UKV3|ACINU_HUMAN	Q9UKV3	ACIN1	Apoptotic chromatin condensation inducer in the nucleus OS=Homo sapiens OX=9606 GN=ACIN1 PE=1 SV=2	32.77	0.000758406	95.877	[26] Phospho (ST)	1	ADDSRIS*EDETER	898	sp|Q9UKV3|ACINU_HUMAN	7.225e+06	8.09719e+06	9.07211e+06	8.58328e+06	1.28784e+07	2.55785e+06	8.09719e+06	8.58328e+06	0.113636	0.647523	0.0841073	0	0	0.65485	0.787796	0.65485	0.787796
SLSPGVSR	sp|Q9UKV3|ACINU_HUMAN	Q9UKV3	ACIN1	Apoptotic chromatin condensation inducer in the nucleus OS=Homo sapiens OX=9606 GN=ACIN1 PE=1 SV=2	18.63	0.00156036	41.8326	[1] Phospho (ST)|[3] Phospho (ST)	2	SSNSRKS*LSPGVS,NSRKSLS*PGVSRD	655657	sp|Q9UKV3|ACINU_HUMAN	256290	352904	333405	248452	803705	701659	333405	701659	0.162604	0.505563	1.0735	0	0	0.211165	0.409158	0.211165	0.409158
SLSPGVSR	sp|Q9UKV3|ACINU_HUMAN	Q9UKV3	ACIN1	Apoptotic chromatin condensation inducer in the nucleus OS=Homo sapiens OX=9606 GN=ACIN1 PE=1 SV=2	39.76	0.00050045	38.9129	[3] Phospho (ST)	1	NSRKSLS*PGVSRD	657	sp|Q9UKV3|ACINU_HUMAN	280222	395951	550266	273828	675466	1.84854e+06	395951	675466	0.3314	0.877369	0.770563	0	0	0.314963	0.510551	0.314963	0.510551
SQEQEVLER	sp|Q9UKV3|ACINU_HUMAN	Q9UKV3	ACIN1	Apoptotic chromatin condensation inducer in the nucleus OS=Homo sapiens OX=9606 GN=ACIN1 PE=1 SV=2	22.2	0.00140149	44.8334	[1] Phospho (ST)	1	ERPKTRS*QEQEVL	328	sp|Q9UKV3|ACINU_HUMAN	26242.8	9715.48	37530.6	16990.4	32931.8	3264.82	26242.8	16990.4	0.571089	0.837457	-0.627201	0	0	0.458239	0.633115	0.458239	0.633115
SSSISEEKGDSDDEKPR	sp|Q9UKV3|ACINU_HUMAN	Q9UKV3	ACIN1	Apoptotic chromatin condensation inducer in the nucleus OS=Homo sapiens OX=9606 GN=ACIN1 PE=1 SV=2	106.54	0	21.2214	[11] Phospho (ST)	1	SEEKGDS*DDEKPR	216	sp|Q9UKV3|ACINU_HUMAN	1.57684e+07	1.50858e+07	19794612	1.44662e+07	3.54055e+07	1.88454e+07	1.57684e+07	1.88454e+07	0.150719	0.482167	0.257177	0	0	0.437267	0.617819	0.437267	0.617819
SSSISEEKGDSDDEKPR	sp|Q9UKV3|ACINU_HUMAN	Q9UKV3	ACIN1	Apoptotic chromatin condensation inducer in the nucleus OS=Homo sapiens OX=9606 GN=ACIN1 PE=1 SV=2	114.08	0	23.3482	[3] Phospho (ST)|[11] Phospho (ST)	2	SPRKSSS*ISEEKG,SEEKGDS*DDEKPR	208216	sp|Q9UKV3|ACINU_HUMAN	188590	261835	259824	7143.03	454293	425536	259824	425536	0.176218	0.8465	0.711744	0.333333	0.111111	0.552257	0.710209	0.552257	0.710209
SSSISEEKGDSDDEKPR	sp|Q9UKV3|ACINU_HUMAN	Q9UKV3	ACIN1	Apoptotic chromatin condensation inducer in the nucleus OS=Homo sapiens OX=9606 GN=ACIN1 PE=1 SV=2	83.85	0.000298954	24.6207	[5] Phospho (ST)|[11] Phospho (ST)	2	RKSSSIS*EEKGDS,SEEKGDS*DDEKPR	210216	sp|Q9UKV3|ACINU_HUMAN	518991	264178	544426	12008.1	1.02688e+06	274078	518991	274078	0.350215	1.20378	-0.921124	0	0	0.40415	0.590918	0.40415	0.590918
TAQVPSPPR	sp|Q9UKV3|ACINU_HUMAN	Q9UKV3	ACIN1	Apoptotic chromatin condensation inducer in the nucleus OS=Homo sapiens OX=9606 GN=ACIN1 PE=1 SV=2	41.88	0.000316056	51.3538	[6] Phospho (ST)	1	RTAQVPS*PPRGKI	1004	sp|Q9UKV3|ACINU_HUMAN	3.18818e+07	3.15914e+07	3.36396e+07	6.0879e+07	5.72542e+07	6.50847e+07	3.18818e+07	6.0879e+07	0.0342366	0.0641663	0.933213	0	0	0.0101376	0.075021	0.0101376	0.075021
TAQVPSPPRGK	sp|Q9UKV3|ACINU_HUMAN	Q9UKV3	ACIN1	Apoptotic chromatin condensation inducer in the nucleus OS=Homo sapiens OX=9606 GN=ACIN1 PE=1 SV=2	44.02	0.000222668	40.5018	[6] Phospho (ST)	1	RTAQVPS*PPRGKI	1004	sp|Q9UKV3|ACINU_HUMAN	825686	1.74727e+06	1.04292e+06	535123	1.56948e+06	517579	1.04292e+06	535123	0.399714	0.689099	-0.962684	0	0	0.338225	0.531912	0.338225	0.531912
TEEEEEEEEEEEEDDEEEEGDDEGQKSR	sp|Q9UKV3|ACINU_HUMAN	Q9UKV3	ACIN1	Apoptotic chromatin condensation inducer in the nucleus OS=Homo sapiens OX=9606 GN=ACIN1 PE=1 SV=2	36.42	0.000460872	43.7581	[27] Phospho (ST)	1	DDEGQKS*REAPIL	295	sp|Q9UKV3|ACINU_HUMAN	64.3053	64.3053	4219.06	64.3053	64.3053	64.3053	64.3053	64.3053	1.6552	0	0	0.666667	1	0.288552	0.488977	0.288552	0.488977
TTSPLEEEER	sp|Q9UKV3|ACINU_HUMAN	Q9UKV3	ACIN1	Apoptotic chromatin condensation inducer in the nucleus OS=Homo sapiens OX=9606 GN=ACIN1 PE=1 SV=2	47.56	0.000121403	41.5423	[3] Phospho (ST)	1	KEMKTTS*PLEEEE	365	sp|Q9UKV3|ACINU_HUMAN	3.54385e+06	3.75591e+06	3.79307e+06	6.67184e+06	7.85774e+06	6.97009e+06	3.75591e+06	6.97009e+06	0.0363621	0.0860772	0.892014	0	0	0.0090629	0.0714167	0.0090629	0.0714167
TTSPLEEEEREIK	sp|Q9UKV3|ACINU_HUMAN	Q9UKV3	ACIN1	Apoptotic chromatin condensation inducer in the nucleus OS=Homo sapiens OX=9606 GN=ACIN1 PE=1 SV=2	13.87	0.00178243	68.8672	[3] Phospho (ST)	1	KEMKTTS*PLEEEE	365	sp|Q9UKV3|ACINU_HUMAN	69313.6	82654.1	96456.3	95178.4	117579	35614.6	82654.1	95178.4	0.163897	0.51169	0.203548	0	0	0.773219	0.867859	0.773219	0.867859
AKPAMPQDSVPSPR	sp|P53396|ACLY_HUMAN	P53396	ACLY	ATP-citrate synthase OS=Homo sapiens OX=9606 GN=ACLY PE=1 SV=3	89.08	0	55.2868	[12] Phospho (ST)	1	PQDSVPS*PRSLQG	481	sp|P53396|ACLY_HUMAN	1.03816e+07	1.05485e+07	1.06118e+07	1.32645e+07	8.96602e+06	1.18404e+07	1.05485e+07	1.18404e+07	0.0113145	0.1928	0.166686	0	0	0.748661	0.852035	0.748661	0.852035
AKPAMPQDSVPSPR	sp|P53396|ACLY_HUMAN	P53396	ACLY	ATP-citrate synthase OS=Homo sapiens OX=9606 GN=ACLY PE=1 SV=3	60.39	0.000166113	40.9126	[5] Oxidation (M)|[12] Phospho (ST)	2	KKAKPAM*PQDSVP,PQDSVPS*PRSLQG	474481	sp|P53396|ACLY_HUMAN	1.03521e+07	8.82535e+06	9.54462e+06	1.18e+07	6.38633e+06	5.52578e+06	9.54462e+06	6.38633e+06	0.0797765	0.430326	-0.5797	0	0	0.379166	0.568149	0.379166	0.568149
PAMPQDSVPSPR	sp|P53396|ACLY_HUMAN	P53396	ACLY	ATP-citrate synthase OS=Homo sapiens OX=9606 GN=ACLY PE=1 SV=3	49.22	0.000126775	62.0278	[10] Phospho (ST)	1	PQDSVPS*PRSLQG	481	sp|P53396|ACLY_HUMAN	441208	385068	447770	470370	395045	299349	441208	395045	0.0811516	0.220764	-0.159444	0	0	0.623843	0.765203	0.623843	0.765203
PIPNQPPTAAHTANFLLNASGSTSTPAPSR	sp|P53396|ACLY_HUMAN	P53396	ACLY	ATP-citrate synthase OS=Homo sapiens OX=9606 GN=ACLY PE=1 SV=3	75.97	0.000245158	93.6264	[25] Phospho (ST)	1	ASGSTST*PAPSRT	447	sp|P53396|ACLY_HUMAN	86876.3	77423.9	110033	740075	263773	449101	86876.3	449101	0.183473	0.495741	2.37001	0	0	0.00272574	0.043933	0.00272574	0.043933
TASFSESR	sp|P53396|ACLY_HUMAN	P53396	ACLY	ATP-citrate synthase OS=Homo sapiens OX=9606 GN=ACLY PE=1 SV=3	39.24	0.000493486	29.4278	[3] Phospho (ST)	1	APSRTAS*FSESRA	455	sp|P53396|ACLY_HUMAN	3.80251e+06	5.63917e+06	5.69095e+06	5.97265e+06	4.72749e+06	1.01548e+07	5.63917e+06	5.97265e+06	0.213245	0.408972	0.0828904	0	0	0.343092	0.5362	0.343092	0.5362
TASFSESRADEVAPAKK	sp|P53396|ACLY_HUMAN	P53396	ACLY	ATP-citrate synthase OS=Homo sapiens OX=9606 GN=ACLY PE=1 SV=3	63.47	0.00018018	47.6927	[3] Phospho (ST)	1	APSRTAS*FSESRA	455	sp|P53396|ACLY_HUMAN	898757	1.78391e+06	881080	638720	552503	1.16638e+06	898757	638720	0.434562	0.422898	-0.492747	0	0	0.249235	0.45076	0.249235	0.45076
IRLSPEPWTPETGLVTDAFK	sp|O95573|ACSL3_HUMAN	O95573	ACSL3	Long-chain-fatty-acid--CoA ligase 3 OS=Homo sapiens OX=9606 GN=ACSL3 PE=1 SV=3	19.37	0.00158398	99.3085	[4] Phospho (ST)	1	PVKIRLS*PEPWTP	683	sp|O95573|ACSL3_HUMAN	42774.7	69561.5	64571.9	45616.4	18224.3	39638.3	64571.9	39638.3	0.241568	0.417554	-0.70401	0	0	0.117317	0.288353	0.117317	0.288353
AELGMGDSTSQSPPIKR	sp|Q9NR19|ACSA_HUMAN	Q9NR19	ACSS2	Acetyl-coenzyme A synthetase, cytoplasmic OS=Homo sapiens OX=9606 GN=ACSS2 PE=1 SV=1	134.59	0	67.1187	[12] Phospho (ST)	1	GDSTSQS*PPIKRS	267	sp|Q9NR19|ACSA_HUMAN	1.72477e+06	2.02921e+06	1.97659e+06	2.29975e+06	1.61281e+06	903512	1.97659e+06	1.61281e+06	0.0851844	0.434887	-0.293439	0	0	0.431355	0.613061	0.431355	0.613061
AELGMGDSTSQSPPIKR	sp|Q9NR19|ACSA_HUMAN	Q9NR19	ACSS2	Acetyl-coenzyme A synthetase, cytoplasmic OS=Homo sapiens OX=9606 GN=ACSS2 PE=1 SV=1	84.88	0.000307882	52.5384	[5] Oxidation (M)|[12] Phospho (ST)	2	GRAELGM*GDSTSQ,GDSTSQS*PPIKRS	260267	sp|Q9NR19|ACSA_HUMAN	998553	1.03474e+06	999984	1.4643e+06	1.12609e+06	602851	999984	1.12609e+06	0.0202684	0.407759	0.171349	0	0	0.96437	0.981858	0.96437	0.981858
ARSWSPPPEVSR	sp|Q9NR19|ACSA_HUMAN	Q9NR19	ACSS2	Acetyl-coenzyme A synthetase, cytoplasmic OS=Homo sapiens OX=9606 GN=ACSS2 PE=1 SV=1	19.34	0.00158298	67.3357	[3] Phospho (ST)|[5] Phospho (ST)	2	AGGRARS*WSPPPE,GRARSWS*PPPEVS	28,30	sp|Q9NR19|ACSA_HUMAN	45711.5	72583.8	65785.8	145788	89239.4	141325	65785.8	141325	0.227705	0.25061	1.10317	0	0	0.0283322	0.129504	0.0283322	0.129504
SWSPPPEVSR	sp|Q9NR19|ACSA_HUMAN	Q9NR19	ACSS2	Acetyl-coenzyme A synthetase, cytoplasmic OS=Homo sapiens OX=9606 GN=ACSS2 PE=1 SV=1	27.11	0.00103527	74.6517	[3] Phospho (ST)	1	GRARSWS*PPPEVS	30	sp|Q9NR19|ACSA_HUMAN	5.2419e+06	5.97861e+06	5.88328e+06	7.67174e+06	4.58166e+06	7.89677e+06	5.88328e+06	7.67174e+06	0.0702761	0.275795	0.382933	0	0	0.566031	0.720698	0.566031	0.720698
AVFPSIVGRPR	sp|P60709|ACTB_HUMAN	P60709	ACTB	Actin, cytoplasmic 1 OS=Homo sapiens OX=9606 GN=ACTB PE=1 SV=1	20.6	0.00148896	90.0001	[5] Phospho (ST)	1	PRAVFPS*IVGRPR	33	sp|P60709|ACTB_HUMAN	190423	272193	234671	274633	342646	253662	234671	274633	0.176102	0.160235	0.226865	0	0	0.306606	0.502693	0.306606	0.502693
EITALAPSTMK	sp|P60709|ACTB_HUMAN	P60709	ACTB	Actin, cytoplasmic 1 OS=Homo sapiens OX=9606 GN=ACTB PE=1 SV=1	29.15	0.00100822	82.8347	[8] Phospho (ST)	1	ITALAPS*TMKIKI	323	sp|P60709|ACTB_HUMAN	98980.3	106433	125587	148936	102641	20082.3	106433	102641	0.1244	0.720812	-0.0523436	0	0	0.410829	0.596825	0.410829	0.596825
GYSFTTTAER	sp|P60709|ACTB_HUMAN	P60709	ACTB	Actin, cytoplasmic 1 OS=Homo sapiens OX=9606 GN=ACTB PE=1 SV=1	34.89	0.000532245	65.0702	[3] Phospho (ST)	1	LTERGYS*FTTTAE	199	sp|P60709|ACTB_HUMAN	24485.4	14333.6	21595.9	25126.6	29452.7	23690.8	21595.9	25126.6	0.25973	0.114962	0.218458	0	0	0.253064	0.455279	0.253064	0.455279
LCYVALDFEQEMATAASSSSLEK	sp|P60709|ACTB_HUMAN	P60709	ACTB	Actin, cytoplasmic 1 OS=Homo sapiens OX=9606 GN=ACTB PE=1 SV=1	46.62	0.000118147	99.5972	[19] Phospho (ST)	1	ATAASSS*SLEKSY	234	sp|P60709|ACTB_HUMAN	130998	132851	155831	107105	115892	199821	132851	115892	0.0988841	0.36315	-0.197028	0	0	0.904421	0.947188	0.904421	0.947188
EGSPANWK	sp|O96019|ACL6A_HUMAN	O96019	ACTL6A	Actin-like protein 6A OS=Homo sapiens OX=9606 GN=ACTL6A PE=1 SV=1	16.61	0.00150584	38.6775	[3] Phospho (ST)	1	EAVREGS*PANWKR	233	sp|O96019|ACL6A_HUMAN	433626	696903	997649	365696	603274	504806	696903	504806	0.397831	0.242982	-0.465228	0	0	0.297026	0.494952	0.297026	0.494952
FAIQDISVEETSAK	sp|O43707|ACTN4_HUMAN	O43707	ACTN4	Alpha-actinin-4 OS=Homo sapiens OX=9606 GN=ACTN4 PE=1 SV=2	74.46	0.000236183	89.9296	[7] Phospho (ST)	1	FAIQDIS*VEETSA	159	sp|O43707|ACTN4_HUMAN	182904	192714	193609	387985	274705	403788	192714	387985	0.0313012	0.19806	1.00954	0	0	0.0211113	0.110875	0.0211113	0.110875
AFSTEK	sp|Q9NZ32|ARP10_HUMAN	Q9NZ32	ACTR10	Actin-related protein 10 OS=Homo sapiens OX=9606 GN=ACTR10 PE=1 SV=1	14.29	0.00173511	25.6591	[3] Phospho (ST)	1	LMKRAFS*TEK	414	sp|Q9NZ32|ARP10_HUMAN	64283.7	102417	68080.2	3712.49	4743.62	420.802	68080.2	3712.49	0.268415	0.763026	-4.19678	0	0	0.00210434	0.0397617	0.00210434	0.0397617
RAFSTEK	sp|Q9NZ32|ARP10_HUMAN	Q9NZ32	ACTR10	Actin-related protein 10 OS=Homo sapiens OX=9606 GN=ACTR10 PE=1 SV=1	24.52	0.00133062	20.804	[4] Phospho (ST)	1	LMKRAFS*TEK	414	sp|Q9NZ32|ARP10_HUMAN	332603	109634	532016	115506	144829	9436.12	332603	115506	0.650655	0.792111	-1.52583	0	0	0.113063	0.282061	0.113063	0.282061
RIPVSPEQAR	sp|Q9H981|ARP8_HUMAN	Q9H981	ACTR8	Actin-related protein 8 OS=Homo sapiens OX=9606 GN=ACTR8 PE=1 SV=2	30.08	0.000950495	50.3464	[5] Phospho (ST)	1	TRRIPVS*PEQARS	132	sp|Q9H981|ARP8_HUMAN	238973	306976	297588	522016	166600	298736	297588	298736	0.131061	0.545839	0.00555876	0	0	0.866438	0.92515	0.866438	0.92515
SQGDPEDPHDEHYLLATQSK	sp|Q9H981|ARP8_HUMAN	Q9H981	ACTR8	Actin-related protein 8 OS=Homo sapiens OX=9606 GN=ACTR8 PE=1 SV=2	53.19	0.000139295	66.5951	[1] Phospho (ST)	1	TTLQHRS*QGDPED	412	sp|Q9H981|ARP8_HUMAN	66837.5	100385	73997.1	134390	55372.9	693872	73997.1	134390	0.219739	1.18175	0.860882	0	0	0.281301	0.485146	0.281301	0.485146
LPPPKPLPGTLKR	sp|O14672|ADA10_HUMAN	O14672	ADAM10	Disintegrin and metalloproteinase domain-containing protein 10 OS=Homo sapiens OX=9606 GN=ADAM10 PE=1 SV=1	13.63	0.00183203	66.743	[10] Phospho (ST)	1	PKPLPGT*LKRRRP	719	sp|O14672|ADA10_HUMAN	19962.6	38747.8	33549.9	1963.44	1463.6	345248	33549.9	1963.44	0.315405	1.70652	-4.09485	0	0.333333	0.502222	0.670522	0.502222	0.670522
IIKPFPAPQTPGR	sp|P78536|ADA17_HUMAN	P78536	ADAM17	Disintegrin and metalloproteinase domain-containing protein 17 OS=Homo sapiens OX=9606 GN=ADAM17 PE=1 SV=1	35.31	0.000448471	80.9581	[10] Phospho (ST)	1	PFPAPQT*PGRLQP	735	sp|P78536|ADA17_HUMAN	2707.55	12168.7	9417.33	20661.3	4430.74	24575.4	9417.33	20661.3	0.600976	0.645177	1.13354	0	0	0.334924	0.528976	0.334924	0.528976
SFEDLTDHPVTR	sp|P78536|ADA17_HUMAN	P78536	ADAM17	Disintegrin and metalloproteinase domain-containing protein 17 OS=Homo sapiens OX=9606 GN=ADAM17 PE=1 SV=1	65.08	0.000187652	72.7937	[1] Phospho (ST)	1	SSTAAKS*FEDLTD	791	sp|P78536|ADA17_HUMAN	134174	139622	142798	111639	119266	805769	139622	119266	0.0314079	1.15342	-0.227346	0	0	0.450975	0.627681	0.450975	0.627681
SNSTETLSPAK	sp|Q9P0K1|ADA22_HUMAN	Q9P0K1	ADAM22	Disintegrin and metalloproteinase domain-containing protein 22 OS=Homo sapiens OX=9606 GN=ADAM22 PE=1 SV=1	53.1	0.000139005	36.8124	[3] Phospho (ST)	1	FRPRSNS*TETLSP	857	sp|Q9P0K1|ADA22_HUMAN	157636	201182	170246	60351.1	16729.9	155111	170246	60351.1	0.127055	0.914087	-1.49617	0	0	0.08819	0.24514	0.08819	0.24514
SNSWQGNLGGNK	sp|Q9P0K1|ADA22_HUMAN	Q9P0K1	ADAM22	Disintegrin and metalloproteinase domain-containing protein 22 OS=Homo sapiens OX=9606 GN=ADAM22 PE=1 SV=1	53.81	0.000141483	54.23	[3] Phospho (ST)	1	GRPRSNS*WQGNLG	834	sp|Q9P0K1|ADA22_HUMAN	420944	391353	329447	82251.5	62900.5	273493	391353	82251.5	0.12268	0.834135	-2.25036	0	0.333333	0.0297001	0.132994	0.0297001	0.132994
EVPIYANR	sp|Q13443|ADAM9_HUMAN	Q13443	ADAM9	Disintegrin and metalloproteinase domain-containing protein 9 OS=Homo sapiens OX=9606 GN=ADAM9 PE=1 SV=1	19.74	0.00146712	49.738	[5] Phospho (Y)	1	PREVPIY*ANRFAV	769	sp|Q13443|ADAM9_HUMAN	42388.8	67098.9	57820	2557.87	5506.51	57367.3	57820	5506.51	0.223816	1.41346	-3.39236	0	0.333333	0.0759317	0.225271	0.0759317	0.225271
HVSPVTPPR	sp|Q13443|ADAM9_HUMAN	Q13443	ADAM9	Disintegrin and metalloproteinase domain-containing protein 9 OS=Homo sapiens OX=9606 GN=ADAM9 PE=1 SV=1	11.72	0.00183374	43.283	[3] Phospho (ST)|[6] Phospho (ST)	2	SVPRHVS*PVTPPR,RHVSPVT*PPREVP	758761	sp|Q13443|ADAM9_HUMAN	360359	464554	287059	195404	145571	345331	360359	195404	0.240638	0.454501	-0.882971	0	0	0.125028	0.298866	0.125028	0.298866
HVSPVTPPR	sp|Q13443|ADAM9_HUMAN	Q13443	ADAM9	Disintegrin and metalloproteinase domain-containing protein 9 OS=Homo sapiens OX=9606 GN=ADAM9 PE=1 SV=1	31.09	0.000891482	44.4354	[6] Phospho (ST)	1	RHVSPVT*PPREVP	761	sp|Q13443|ADAM9_HUMAN	3.45473e+06	4.23854e+06	4.2447e+06	2.34887e+06	1.68375e+06	2.34588e+06	4.23854e+06	2.34588e+06	0.114171	0.180204	-0.853439	0	0	0.0197922	0.106926	0.0197922	0.106926
HVSPVTPPREVPIYANR	sp|Q13443|ADAM9_HUMAN	Q13443	ADAM9	Disintegrin and metalloproteinase domain-containing protein 9 OS=Homo sapiens OX=9606 GN=ADAM9 PE=1 SV=1	10.47	0.00179846	82.7538	[6] Phospho (ST)	1	RHVSPVT*PPREVP	761	sp|Q13443|ADAM9_HUMAN	1.30884e+06	2.18596e+06	2.3398e+06	1.49845e+06	1.1115e+06	1.52439e+06	2.18596e+06	1.49845e+06	0.285964	0.167808	-0.544796	0	0	0.231463	0.43167	0.231463	0.43167
TAESQTPTPSATSFFSGK	sp|P55265|DSRAD_HUMAN	P55265	ADAR	Double-stranded RNA-specific adenosine deaminase OS=Homo sapiens OX=9606 GN=ADAR PE=1 SV=4	86.85	0	90.0577	[6] Phospho (ST)	1	KTAESQT*PTPSAT	601	sp|P55265|DSRAD_HUMAN	1.33854e+06	1.56626e+06	1.08373e+06	1.60454e+06	494424	363038	1.33854e+06	494424	0.181566	0.831062	-1.43684	0	0	0.160237	0.346736	0.160237	0.346736
TAESQTPTPSATSFFSGKSPVTTLLECMHK	sp|P55265|DSRAD_HUMAN	P55265	ADAR	Double-stranded RNA-specific adenosine deaminase OS=Homo sapiens OX=9606 GN=ADAR PE=1 SV=4	16.62	0.0015063	98.9656	[19] Phospho (ST)	1	SFFSGKS*PVTTLL	614	sp|P55265|DSRAD_HUMAN	62692.7	89308.5	123270	133763	87237.3	11982.5	89308.5	87237.3	0.330902	0.791292	-0.0338515	0	0	0.45903	0.633719	0.45903	0.633719
NLDNVSPK	sp|P78563|RED1_HUMAN	P78563	ADARB1	Double-stranded RNA-specific editase 1 OS=Homo sapiens OX=9606 GN=ADARB1 PE=1 SV=1	30.7	0.000882329	37.0146	[6] Phospho (ST)	1	RNLDNVS*PKDGST	26	sp|P78563|RED1_HUMAN	51543.8	63997.7	32851.6	43496	602593	1.416e+06	51543.8	602593	0.316932	1.00408	3.54731	0	0	0.0810634	0.234103	0.0810634	0.234103
KCEDPDSPVTK	sp|Q9BUB4|ADAT1_HUMAN	Q9BUB4	ADAT1	tRNA-specific adenosine deaminase 1 OS=Homo sapiens OX=9606 GN=ADAT1 PE=1 SV=1	39.74	0.00050015	22.1676	[7] Phospho (ST)	1	KCEDPDS*PVTKKM	191	sp|Q9BUB4|ADAT1_HUMAN	88464.7	182763	193959	47933.7	59755.2	154869	182763	59755.2	0.373696	0.669857	-1.61284	0	0	0.162536	0.349505	0.162536	0.349505
KCEDPDSPVTKK	sp|Q9BUB4|ADAT1_HUMAN	Q9BUB4	ADAT1	tRNA-specific adenosine deaminase 1 OS=Homo sapiens OX=9606 GN=ADAT1 PE=1 SV=1	69.25	0.000205592	18.7906	[7] Phospho (ST)	1	KCEDPDS*PVTKKM	191	sp|Q9BUB4|ADAT1_HUMAN	49893.7	115017	85769.8	24129.3	22281.5	131644	85769.8	24129.3	0.390353	1.05496	-1.82969	0	0	0.291905	0.490526	0.291905	0.490526
SGPISPGIHSCDLTVEGLATVTR	sp|Q9BUB4|ADAT1_HUMAN	Q9BUB4	ADAT1	tRNA-specific adenosine deaminase 1 OS=Homo sapiens OX=9606 GN=ADAT1 PE=1 SV=1	48.46	0.000124456	96.5272	[5] Phospho (ST)	1	QKSGPIS*PGIHSC	227	sp|Q9BUB4|ADAT1_HUMAN	101959	119936	126027	118162	329774	215033	119936	215033	0.107899	0.479352	0.842287	0	0	0.116647	0.287289	0.116647	0.287289
SSSPALIETK	sp|O60266|ADCY3_HUMAN	O60266	ADCY3	Adenylate cyclase type 3 OS=Homo sapiens OX=9606 GN=ADCY3 PE=1 SV=3	53.16	0.000139179	57.5266	[3] Phospho (ST)	1	ASSKSSS*PALIET	525	sp|O60266|ADCY3_HUMAN	46067.4	57015.2	58889.5	127447	41398	50383.6	57015.2	50383.6	0.128271	0.647274	-0.178392	0.333333	0.166667	0.617328	0.760584	0.617328	0.760584
ANSMEGLMPR	sp|O43306|ADCY6_HUMAN	O43306	ADCY6	Adenylate cyclase type 6 OS=Homo sapiens OX=9606 GN=ADCY6 PE=1 SV=2	42.34	0.000213424	57.0336	[3] Phospho (ST)|[8] Oxidation (M)	2	QRTRANS*MEGLMP,NSMEGLM*PRWVPD	576581	sp|O43306|ADCY6_HUMAN	11394.3	19897.4	19218	13317	4909.38	22480.8	19218	13317	0.280661	0.64768	-0.529193	0	0.333333	0.442125	0.621233	0.442125	0.621233
DAEPPSPTPAGPPR	sp|O43306|ADCY6_HUMAN	O43306	ADCY6	Adenylate cyclase type 6 OS=Homo sapiens OX=9606 GN=ADCY6 PE=1 SV=2	40.86	0.000411184	50.9624	[6] Phospho (ST)	1	RDAEPPS*PTPAGP	54	sp|O43306|ADCY6_HUMAN	1.05604e+06	1.57797e+06	1.38412e+06	1.99615e+06	1.01553e+06	1.09077e+06	1.38412e+06	1.09077e+06	0.196976	0.399084	-0.343622	0	0	0.959223	0.97942	0.959223	0.97942
DAHLSPK	sp|O60503|ADCY9_HUMAN	O60503	ADCY9	Adenylate cyclase type 9 OS=Homo sapiens OX=9606 GN=ADCY9 PE=1 SV=4	15.46	0.00165504	22.3887	[5] Phospho (ST)	1	AKDAHLS*PKRPWK	1307	sp|O60503|ADCY9_HUMAN	13758.4	37191.9	39265	3206.92	2991.78	16771.2	37191.9	3206.92	0.471065	1.03103	-3.53573	0	0	0.0346198	0.146464	0.0346198	0.146464
VIPQHQLSISPDIR	sp|O60503|ADCY9_HUMAN	O60503	ADCY9	Adenylate cyclase type 9 OS=Homo sapiens OX=9606 GN=ADCY9 PE=1 SV=4	21.42	0.00138003	86.341	[10] Phospho (ST)	1	QHQLSIS*PDIRVQ	1259	sp|O60503|ADCY9_HUMAN	8221.61	10193	9880.58	64.3053	64.3053	64.3053	9880.58	64.3053	0.112342	0	-7.26351	0	1	2.59e-07	0.000295335	2.59e-07	0.000295335
AAVVTSPPPTTAPHK	sp|P35611|ADDA_HUMAN	P35611	ADD1	Alpha-adducin OS=Homo sapiens OX=9606 GN=ADD1 PE=1 SV=2	75.97	0.000245158	49.7893	[6] Phospho (ST)	1	RAAVVTS*PPPTTA	12	sp|P35611|ADDA_HUMAN	7.19088e+06	9.97489e+06	1.02284e+07	5.50447e+06	4.96744e+06	6.03606e+06	9.97489e+06	5.50447e+06	0.184562	0.0971002	-0.857698	0	0	0.0460533	0.171411	0.0460533	0.171411
EEEAHRPPSPTEAPTEASPEPAPDPAPVAEEAAPSAVEEGAAADPGSDGSPGK	sp|P35611|ADDA_HUMAN	P35611	ADD1	Alpha-adducin OS=Homo sapiens OX=9606 GN=ADD1 PE=1 SV=2	11.7	0.00183303	87.2319	[35] Phospho (ST)|[47] Phospho (ST)	2	AEEAAPS*AVEEGA,AAADPGS*DGSPGK	695707	sp|P35611|ADDA_HUMAN	815982	805447	701848	778667	656307	250428	805447	656307	0.0814469	0.492184	-0.29542	0	0	0.261514	0.464442	0.261514	0.464442
EEEAHRPPSPTEAPTEASPEPAPDPAPVAEEAAPSAVEEGAAADPGSDGSPGK	sp|P35611|ADDA_HUMAN	P35611	ADD1	Alpha-adducin OS=Homo sapiens OX=9606 GN=ADD1 PE=1 SV=2	49.55	0.000127779	86.341	[9] Phospho (ST)	1	EAHRPPS*PTEAPT	669	sp|P35611|ADDA_HUMAN	1.27557e+06	1.18431e+06	1.39744e+06	1.6372e+06	1.75566e+06	371293	1.27557e+06	1.6372e+06	0.0831652	0.611578	0.360095	0	0	0.639743	0.777363	0.639743	0.777363
EKSPPDQPAVPHPPPSTPIK	sp|P35611|ADDA_HUMAN	P35611	ADD1	Alpha-adducin OS=Homo sapiens OX=9606 GN=ADD1 PE=1 SV=2	28.61	0.000996092	71.5704	[3] Phospho (ST)	1	REQKEKS*PPDQPA	600	sp|P35611|ADDA_HUMAN	137423	80004.1	85618.7	87415.8	63064.6	95196.2	85618.7	87415.8	0.313368	0.204694	0.0299678	0	0	0.453147	0.62914	0.453147	0.62914
KQKGSEENLDEAR	sp|P35611|ADDA_HUMAN	P35611	ADD1	Alpha-adducin OS=Homo sapiens OX=9606 GN=ADD1 PE=1 SV=2	87.51	0	20.6823	[5] Phospho (ST)	1	ERKQKGS*EENLDE	586	sp|P35611|ADDA_HUMAN	25866.2	49359.4	68171.6	4224.97	21261.8	33937	49359.4	21261.8	0.443436	0.752693	-1.21506	0	0	0.118978	0.290463	0.118978	0.290463
KYSDVEVPASVTGYSFASDGDSGTCSPLR	sp|P35611|ADDA_HUMAN	P35611	ADD1	Alpha-adducin OS=Homo sapiens OX=9606 GN=ADD1 PE=1 SV=2	101.31	0	93.7708	[26] Phospho (ST)	1	GDSGTCS*PLRHSF	431	sp|P35611|ADDA_HUMAN	180615	139098	173470	156883	226241	383699	173470	226241	0.13502	0.454699	0.383176	0	0	0.229424	0.429134	0.229424	0.429134
KYSDVEVPASVTGYSFASDGDSGTCSPLRHSFQK	sp|P35611|ADDA_HUMAN	P35611	ADD1	Alpha-adducin OS=Homo sapiens OX=9606 GN=ADD1 PE=1 SV=2	16.48	0.00150204	90.1431	[24] Phospho (ST)	1	SDGDSGT*CSPLRH	429	sp|P35611|ADDA_HUMAN	282463	176780	186247	302909	448244	367778	186247	367778	0.271771	0.195204	0.981621	0	0	0.0511116	0.181492	0.0511116	0.181492
QKGSEENLDEAR	sp|P35611|ADDA_HUMAN	P35611	ADD1	Alpha-adducin OS=Homo sapiens OX=9606 GN=ADD1 PE=1 SV=2	50.87	0.000132031	25.8774	[4] Phospho (ST)	1	ERKQKGS*EENLDE	586	sp|P35611|ADDA_HUMAN	59555.6	64014.6	48761.6	25298.2	20379.4	98285.7	59555.6	25298.2	0.136528	0.909163	-1.2352	0	0	0.377357	0.567022	0.377357	0.567022
SPGSPVGEGTGSPPK	sp|P35611|ADDA_HUMAN	P35611	ADD1	Alpha-adducin OS=Homo sapiens OX=9606 GN=ADD1 PE=1 SV=2	24.16	0.00131743	44.3286	[12] Phospho (ST)	1	VGEGTGS*PPKWQI	366	sp|P35611|ADDA_HUMAN	9677.98	64.3053	8875.42	8710.89	64.3053	8953.47	8875.42	8710.89	0.859487	0.856848	-0.0269942	0.333333	0.333333	0.987582	0.993878	0.987582	0.993878
SPGSPVGEGTGSPPK	sp|P35611|ADDA_HUMAN	P35611	ADD1	Alpha-adducin OS=Homo sapiens OX=9606 GN=ADD1 PE=1 SV=2	84.86	0.000307692	38.3956	[4] Phospho (ST)	1	KSRSPGS*PVGEGT	358	sp|P35611|ADDA_HUMAN	4.2776e+06	4.83023e+06	5.32016e+06	3.19747e+06	4.32886e+06	4.09237e+06	4.83023e+06	4.09237e+06	0.108454	0.154089	-0.239156	0	0	0.288303	0.488977	0.288303	0.488977
SPGSPVGEGTGSPPKWQIGEQEFEALMR	sp|P35611|ADDA_HUMAN	P35611	ADD1	Alpha-adducin OS=Homo sapiens OX=9606 GN=ADD1 PE=1 SV=2	49.04	0.000126247	100.406	[4] Phospho (ST)|[10] Phospho (ST)	2	KSRSPGS*PVGEGT,SPVGEGT*GSPPKW	358364	sp|P35611|ADDA_HUMAN	37694	26945.6	31780.3	8697.08	16521	49187.7	31780.3	16521	0.167493	0.865979	-0.943828	0	0	0.320473	0.515588	0.320473	0.515588
SRSPGSPVGEGTGSPPK	sp|P35611|ADDA_HUMAN	P35611	ADD1	Alpha-adducin OS=Homo sapiens OX=9606 GN=ADD1 PE=1 SV=2	18.73	0.00156377	37.3391	[3] Phospho (ST)	1	YKAKSRS*PGSPVG	355	sp|P35611|ADDA_HUMAN	106346	59630.8	77852.5	69940.4	132716	138634	77852.5	132716	0.289689	0.334617	0.769529	0	0	0.308623	0.504609	0.308623	0.504609
SRSPGSPVGEGTGSPPK	sp|P35611|ADDA_HUMAN	P35611	ADD1	Alpha-adducin OS=Homo sapiens OX=9606 GN=ADD1 PE=1 SV=2	73.59	0.00023084	34.4247	[6] Phospho (ST)	1	KSRSPGS*PVGEGT	358	sp|P35611|ADDA_HUMAN	237112	187137	252759	140062	246890	229531	237112	229531	0.151881	0.278972	-0.0468811	0	0	0.64205	0.778323	0.64205	0.778323
FRTPSFLK	sp|Q9UEY8|ADDG_HUMAN	Q9UEY8	ADD3	Gamma-adducin OS=Homo sapiens OX=9606 GN=ADD3 PE=1 SV=1	16.5	0.00150267	84.1805	[3] Phospho (ST)	1	KKKKFRT*PSFLKK	691	sp|Q9UEY8|ADDG_HUMAN	12670.7	5821.47	6540.25	2931.83	3056.01	2565.01	6540.25	2931.83	0.451108	0.0895472	-1.15754	0	0	0.00992291	0.0742509	0.00992291	0.0742509
FRTPSFLK	sp|Q9UEY8|ADDG_HUMAN	Q9UEY8	ADD3	Gamma-adducin OS=Homo sapiens OX=9606 GN=ADD3 PE=1 SV=1	11.14	0.00181778	89.5983	[5] Phospho (ST)	1	KKFRTPS*FLKKNK	693	sp|Q9UEY8|ADDG_HUMAN	41229.9	45490.2	44378.6	35651.2	18701.5	254478	44378.6	35651.2	0.0505689	1.27746	-0.315914	0	0	0.741056	0.8471	0.741056	0.8471
FRTPSFLKK	sp|Q9UEY8|ADDG_HUMAN	Q9UEY8	ADD3	Gamma-adducin OS=Homo sapiens OX=9606 GN=ADD3 PE=1 SV=1	41.97	0.000316823	79.1924	[5] Phospho (ST)	1	KKFRTPS*FLKKNK	693	sp|Q9UEY8|ADDG_HUMAN	235509	277976	276922	145427	103808	310266	276922	145427	0.0919266	0.585448	-0.929192	0	0	0.21369	0.411804	0.21369	0.411804
HKSDVEIPATVTAFSFEDDTVPLSPLK	sp|Q9UEY8|ADDG_HUMAN	Q9UEY8	ADD3	Gamma-adducin OS=Homo sapiens OX=9606 GN=ADD3 PE=1 SV=1	67.85	0.00019861	98.718	[24] Phospho (ST)	1	DDTVPLS*PLKYMA	423	sp|Q9UEY8|ADDG_HUMAN	287899	248130	209259	191276	335542	206691	248130	206691	0.158277	0.323996	-0.263625	0	0	0.870719	0.927609	0.870719	0.927609
IEEVLSPEGSPSK	sp|Q9UEY8|ADDG_HUMAN	Q9UEY8	ADD3	Gamma-adducin OS=Homo sapiens OX=9606 GN=ADD3 PE=1 SV=1	16.31	0.00149844	66.8301	[6] Phospho (ST)|[10] Phospho (ST)	2	KIEEVLS*PEGSPS,VLSPEGS*PSKSPS	673677	sp|Q9UEY8|ADDG_HUMAN	65455.8	59323.3	36205.5	8858.11	7331.26	75211.5	59323.3	8858.11	0.287454	1.27211	-2.74353	0	0	0.148997	0.332181	0.148997	0.332181
IEEVLSPEGSPSKSPSK	sp|Q9UEY8|ADDG_HUMAN	Q9UEY8	ADD3	Gamma-adducin OS=Homo sapiens OX=9606 GN=ADD3 PE=1 SV=1	44.21	0.000223864	66.4969	[10] Phospho (ST)|[14] Phospho (ST)	2	VLSPEGS*PSKSPS,EGSPSKS*PSKKKK	677681	sp|Q9UEY8|ADDG_HUMAN	1.00826e+06	700376	721513	1.15451e+06	1.08906e+06	672996	721513	1.08906e+06	0.212308	0.268639	0.593988	0	0	0.507545	0.67493	0.507545	0.67493
IEEVLSPEGSPSKSPSK	sp|Q9UEY8|ADDG_HUMAN	Q9UEY8	ADD3	Gamma-adducin OS=Homo sapiens OX=9606 GN=ADD3 PE=1 SV=1	49.48	0.000127502	62.7991	[14] Phospho (ST)	1	EGSPSKS*PSKKKK	681	sp|Q9UEY8|ADDG_HUMAN	1.95762e+06	1.73794e+06	1.80668e+06	1.53613e+06	1.29195e+06	3.81157e+06	1.80668e+06	1.53613e+06	0.0612708	0.62786	-0.234034	0	0	0.84054	0.910094	0.84054	0.910094
IEEVLSPEGSPSKSPSK	sp|Q9UEY8|ADDG_HUMAN	Q9UEY8	ADD3	Gamma-adducin OS=Homo sapiens OX=9606 GN=ADD3 PE=1 SV=1	23.21	0.00129208	64.5911	[6] Phospho (ST)|[10] Phospho (ST)|[14] Phospho (ST)	3	KIEEVLS*PEGSPS,VLSPEGS*PSKSPS,EGSPSKS*PSKKKK	673677681	sp|Q9UEY8|ADDG_HUMAN	970893	876058	760656	437249	410162	85183.6	876058	410162	0.121129	0.630224	-1.09483	0	0	0.0445163	0.168151	0.0445163	0.168151
IEEVLSPEGSPSKSPSKK	sp|Q9UEY8|ADDG_HUMAN	Q9UEY8	ADD3	Gamma-adducin OS=Homo sapiens OX=9606 GN=ADD3 PE=1 SV=1	19.34	0.00158298	58.6254	[10] Phospho (ST)|[14] Phospho (ST)	2	VLSPEGS*PSKSPS,EGSPSKS*PSKKKK	677681	sp|Q9UEY8|ADDG_HUMAN	70969.7	84451.1	73475.6	134060	98623.8	113101	73475.6	113101	0.093978	0.154577	0.62227	0	0.333333	0.0727228	0.219883	0.0727228	0.219883
IEEVLSPEGSPSKSPSKK	sp|Q9UEY8|ADDG_HUMAN	Q9UEY8	ADD3	Gamma-adducin OS=Homo sapiens OX=9606 GN=ADD3 PE=1 SV=1	51.5	0.000134066	54.0103	[14] Phospho (ST)	1	EGSPSKS*PSKKKK	681	sp|Q9UEY8|ADDG_HUMAN	2.09656e+06	1.22646e+06	1.42979e+06	1.18282e+06	831752	812651	1.42979e+06	831752	0.287297	0.22116	-0.781574	0	0	0.0767616	0.226641	0.0767616	0.226641
NMSPDLR	sp|Q9UEY8|ADDG_HUMAN	Q9UEY8	ADD3	Gamma-adducin OS=Homo sapiens OX=9606 GN=ADD3 PE=1 SV=1	17.46	0.00152681	29.9202	[2] Oxidation (M)|[3] Phospho (ST)	2	YIRERNM*SPDLRQ,IRERNMS*PDLRQD	41,42	sp|Q9UEY8|ADDG_HUMAN	17857.2	36118.9	45090.4	12267.7	23215.5	23574.4	36118.9	23215.5	0.420268	0.326469	-0.637665	0	0	0.203479	0.399835	0.203479	0.399835
NMSPDLR	sp|Q9UEY8|ADDG_HUMAN	Q9UEY8	ADD3	Gamma-adducin OS=Homo sapiens OX=9606 GN=ADD3 PE=1 SV=1	22.01	0.00139618	49.9933	[3] Phospho (ST)	1	IRERNMS*PDLRQD	42	sp|Q9UEY8|ADDG_HUMAN	23388.9	29115.2	37957.1	64.3053	64.3053	2358.1	29115.2	64.3053	0.2434	1.59768	-8.82262	0	0.666667	0.00373365	0.0496861	0.00373365	0.0496861
SPEKIEEVLSPEGSPSKSPSK	sp|Q9UEY8|ADDG_HUMAN	Q9UEY8	ADD3	Gamma-adducin OS=Homo sapiens OX=9606 GN=ADD3 PE=1 SV=1	21.62	0.0013855	76.4136	[10] Phospho (ST)|[14] Phospho (ST)|[16] Phospho (ST)	3	KIEEVLS*PEGSPS,VLSPEGS*PSKSPS,SPEGSPS*KSPSKK	673677679	sp|Q9UEY8|ADDG_HUMAN	343217	316479	383920	205385	155015	85866	343217	155015	0.0976246	0.403379	-1.14671	0	0	0.0182129	0.102377	0.0182129	0.102377
SPEKIEEVLSPEGSPSKSPSK	sp|Q9UEY8|ADDG_HUMAN	Q9UEY8	ADD3	Gamma-adducin OS=Homo sapiens OX=9606 GN=ADD3 PE=1 SV=1	127.55	0	73.7784	[18] Phospho (ST)	1	EGSPSKS*PSKKKK	681	sp|Q9UEY8|ADDG_HUMAN	1.46364e+06	1.63316e+06	1.77614e+06	1.08649e+06	962258	1.23123e+06	1.63316e+06	1.08649e+06	0.0963102	0.123125	-0.587989	0	0	0.0721197	0.218823	0.0721197	0.218823
SPEKIEEVLSPEGSPSKSPSKK	sp|Q9UEY8|ADDG_HUMAN	Q9UEY8	ADD3	Gamma-adducin OS=Homo sapiens OX=9606 GN=ADD3 PE=1 SV=1	44.44	0.000224921	70.2622	[10] Phospho (ST)|[14] Phospho (ST)|[16] Phospho (ST)	3	KIEEVLS*PEGSPS,VLSPEGS*PSKSPS,SPEGSPS*KSPSKK	673677679	sp|Q9UEY8|ADDG_HUMAN	175586	193007	168164	72566.1	71201.2	72678.2	175586	72566.1	0.0712731	0.011397	-1.27481	0	0	0.00198335	0.0390923	0.00198335	0.0390923
SPEKIEEVLSPEGSPSKSPSKK	sp|Q9UEY8|ADDG_HUMAN	Q9UEY8	ADD3	Gamma-adducin OS=Homo sapiens OX=9606 GN=ADD3 PE=1 SV=1	105.46	0	66.8743	[18] Phospho (ST)	1	EGSPSKS*PSKKKK	681	sp|Q9UEY8|ADDG_HUMAN	533927	597495	659300	335939	354511	646512	597495	354511	0.105022	0.390877	-0.753096	0	0.166667	0.225708	0.42498	0.225708	0.42498
SSDASQGVITTPPPPSMPHK	sp|Q9UEY8|ADDG_HUMAN	Q9UEY8	ADD3	Gamma-adducin OS=Homo sapiens OX=9606 GN=ADD3 PE=1 SV=1	77.06	0.000252653	77.601	[N-term] Acetyl (Protein N-term)|[11] Phospho (ST)	2	MS*SDASQG,SQGVITT*PPPPSM	2,12	sp|Q9UEY8|ADDG_HUMAN	1.00319e+06	937301	973813	870131	847478	883313	973813	870131	0.0339802	0.020906	-0.162412	0	0	0.516172	0.68152	0.516172	0.68152
SSDASQGVITTPPPPSMPHK	sp|Q9UEY8|ADDG_HUMAN	Q9UEY8	ADD3	Gamma-adducin OS=Homo sapiens OX=9606 GN=ADD3 PE=1 SV=1	16.03	0.00155048	65.1539	[N-term] Acetyl (Protein N-term)|[11] Phospho (ST)|[17] Oxidation (M)	3	MS*SDASQG,SQGVITT*PPPPSM,TPPPPSM*PHKERY	2,12,18	sp|Q9UEY8|ADDG_HUMAN	164531	109273	97660.4	111280	150723	404775	109273	150723	0.288565	0.71668	0.463955	0	0	0.295856	0.493967	0.295856	0.493967
TPSFLK	sp|Q9UEY8|ADDG_HUMAN	Q9UEY8	ADD3	Gamma-adducin OS=Homo sapiens OX=9606 GN=ADD3 PE=1 SV=1	15.63	0.00165887	73.3781	[3] Phospho (ST)	1	KKFRTPS*FLKKNK	693	sp|Q9UEY8|ADDG_HUMAN	46607.1	52521	42494.9	16436.4	9865.84	15487.7	46607.1	15487.7	0.106761	0.254952	-1.58943	0	0	0.00161616	0.0357374	0.00161616	0.0357374
VTQILQSPAFR	sp|Q9UEY8|ADDG_HUMAN	Q9UEY8	ADD3	Gamma-adducin OS=Homo sapiens OX=9606 GN=ADD3 PE=1 SV=1	48.98	0.000126008	88.3852	[7] Phospho (ST)	1	VTQILQS*PAFRED	64	sp|Q9UEY8|ADDG_HUMAN	4034.98	9209.63	5360.13	2804.04	2926.83	194.618	5360.13	2804.04	0.433436	0.781312	-0.934762	0	0	0.0948904	0.255536	0.0948904	0.255536
WLNSPNTYMK	sp|Q9UEY8|ADDG_HUMAN	Q9UEY8	ADD3	Gamma-adducin OS=Homo sapiens OX=9606 GN=ADD3 PE=1 SV=1	39.18	0.000492756	88.0174	[4] Phospho (ST)	1	KTRWLNS*PNTYMK	442	sp|Q9UEY8|ADDG_HUMAN	1604.01	1980.93	2125.79	64.3053	76.4391	64.3053	1980.93	64.3053	0.141499	0.102494	-4.9451	0	0.666667	3.55e-06	0.00123882	3.55e-06	0.00123882
WLNSPNTYMK	sp|Q9UEY8|ADDG_HUMAN	Q9UEY8	ADD3	Gamma-adducin OS=Homo sapiens OX=9606 GN=ADD3 PE=1 SV=1	35.65	0.000452161	71.6603	[4] Phospho (ST)|[9] Oxidation (M)	2	KTRWLNS*PNTYMK,NSPNTYM*KVNVPE	442447	sp|Q9UEY8|ADDG_HUMAN	489.753	1076.19	204.171	141.893	102.67	30987.3	489.753	141.893	0.753468	1.71171	-1.78725	0	0.333333	0.779217	0.871664	0.779217	0.871664
LPISSGSTSSSR	sp|Q9Y653|AGRG1_HUMAN	Q9Y653	ADGRG1	Adhesion G-protein coupled receptor G1 OS=Homo sapiens OX=9606 GN=ADGRG1 PE=1 SV=2	51.57	0.000134318	44.7911	[7] Phospho (ST)	1	LPISSGS*TSSSRI	687	sp|Q9Y653|AGRG1_HUMAN	40037	53165.6	62670.9	19676	34889.7	26688	53165.6	26688	0.218739	0.281142	-0.994303	0	0.333333	0.0361353	0.149486	0.0361353	0.149486
GNSDGYIIPINK	sp|O95490|AGRL2_HUMAN	O95490	ADGRL2	Adhesion G protein-coupled receptor L2 OS=Homo sapiens OX=9606 GN=ADGRL2 PE=1 SV=2	61.73	0.000171939	90.2019	[3] Phospho (ST)	1	QISRGNS*DGYIIP	1430	sp|O95490|AGRL2_HUMAN	636928	910962	679639	212701	80536.5	529418	679639	212701	0.198568	0.841217	-1.67594	0	0	0.047199	0.173876	0.047199	0.173876
HSYCCGGLPTESPHSSVK	sp|O95490|AGRL2_HUMAN	O95490	ADGRL2	Adhesion G protein-coupled receptor L2 OS=Homo sapiens OX=9606 GN=ADGRL2 PE=1 SV=2	16.69	0.0015083	51.8237	[12] Phospho (ST)	1	GGLPTES*PHSSVK	1112	sp|O95490|AGRL2_HUMAN	54024.8	164439	129513	57945	25484	13634.7	129513	25484	0.486541	0.709027	-2.34544	0	0	0.0339718	0.14465	0.0339718	0.14465
SENEDIYYK	sp|O95490|AGRL2_HUMAN	O95490	ADGRL2	Adhesion G protein-coupled receptor L2 OS=Homo sapiens OX=9606 GN=ADGRL2 PE=1 SV=2	11.26	0.00182109	53.3199	[1] Phospho (ST)	1	LSPSRRS*ENEDIY	1400	sp|O95490|AGRL2_HUMAN	885.095	12104.6	9774.42	64.3053	64.3053	1992.68	9774.42	64.3053	0.780266	1.57453	-7.24793	0	0.666667	0.0431503	0.164676	0.0431503	0.164676
THSLLYQPQKK	sp|O95490|AGRL2_HUMAN	O95490	ADGRL2	Adhesion G protein-coupled receptor L2 OS=Homo sapiens OX=9606 GN=ADGRL2 PE=1 SV=2	47.33	0.000120467	44.3286	[3] Phospho (ST)	1	IPQRTHS*LLYQPQ	1334	sp|O95490|AGRL2_HUMAN	14556.6	35202.4	40547.8	128.611	128.611	128.611	35202.4	128.611	0.455967	0	-8.09652	0.333333	1	4.96e-06	0.00150073	4.96e-06	0.00150073
DGASPSESGPGSQQVSDFEDNTCEMKPGTWSDESSQSEDAR	sp|Q9H2P0|ADNP_HUMAN	Q9H2P0	ADNP	Activity-dependent neuroprotector homeobox protein OS=Homo sapiens OX=9606 GN=ADNP PE=1 SV=1	33.24	0.000767067	87.8002	[4] Phospho (ST)	1	EWKDGAS*PSESGP	970	sp|Q9H2P0|ADNP_HUMAN	344859	449055	412851	705001	584667	55482.3	412851	584667	0.131509	0.770637	0.501996	0	0	0.649061	0.783682	0.649061	0.783682
LMHNASDSEVDQDDVVEWK	sp|Q9H2P0|ADNP_HUMAN	Q9H2P0	ADNP	Activity-dependent neuroprotector homeobox protein OS=Homo sapiens OX=9606 GN=ADNP PE=1 SV=1	24.66	0.00126493	81.4031	[2] Oxidation (M)|[6] Phospho (ST)	2	EEPTKLM*HNASDS,KLMHNAS*DSEVDQ	949953	sp|Q9H2P0|ADNP_HUMAN	34781.7	37010.8	16686.2	40651.8	63282.4	40460.9	34781.7	40651.8	0.377948	0.272611	0.22499	0	0.333333	0.131695	0.307939	0.131695	0.307939
LMHNASDSEVDQDDVVEWK	sp|Q9H2P0|ADNP_HUMAN	Q9H2P0	ADNP	Activity-dependent neuroprotector homeobox protein OS=Homo sapiens OX=9606 GN=ADNP PE=1 SV=1	84.45	0.000304136	82.8347	[2] Oxidation (M)|[6] Phospho (ST)|[8] Phospho (ST)	3	EEPTKLM*HNASDS,KLMHNAS*DSEVDQ,MHNASDS*EVDQDD	949953955	sp|Q9H2P0|ADNP_HUMAN	408134	366234	236285	647164	255204	14266.4	366234	255204	0.265981	1.04547	-0.521111	0	0	0.401337	0.588294	0.401337	0.588294
LMHNASDSEVDQDDVVEWK	sp|Q9H2P0|ADNP_HUMAN	Q9H2P0	ADNP	Activity-dependent neuroprotector homeobox protein OS=Homo sapiens OX=9606 GN=ADNP PE=1 SV=1	58.67	0.000159236	79.9146	[2] Oxidation (M)|[8] Phospho (ST)	2	EEPTKLM*HNASDS,MHNASDS*EVDQDD	949955	sp|Q9H2P0|ADNP_HUMAN	1.8625e+06	1.57491e+06	1.82025e+06	1.99864e+06	2.61777e+06	627169	1.82025e+06	1.99864e+06	0.0886087	0.582839	0.134881	0	0	0.704841	0.821933	0.704841	0.821933
LMHNASDSEVDQDDVVEWK	sp|Q9H2P0|ADNP_HUMAN	Q9H2P0	ADNP	Activity-dependent neuroprotector homeobox protein OS=Homo sapiens OX=9606 GN=ADNP PE=1 SV=1	120.63	0	87.4247	[6] Phospho (ST)|[8] Phospho (ST)	2	KLMHNAS*DSEVDQ,MHNASDS*EVDQDD	953955	sp|Q9H2P0|ADNP_HUMAN	861598	832165	752284	581018	438352	472936	832165	472936	0.0693737	0.14961	-0.815225	0	0	0.0351845	0.14753	0.0351845	0.14753
LMHNASDSEVDQDDVVEWK	sp|Q9H2P0|ADNP_HUMAN	Q9H2P0	ADNP	Activity-dependent neuroprotector homeobox protein OS=Homo sapiens OX=9606 GN=ADNP PE=1 SV=1	41.85	0.000315756	84.1321	[8] Phospho (ST)	1	MHNASDS*EVDQDD	955	sp|Q9H2P0|ADNP_HUMAN	1.169e+06	926803	976654	830264	1.13544e+06	410442	976654	830264	0.124878	0.459574	-0.234278	0	0	0.320411	0.515588	0.320411	0.515588
LNQSPSLAPVK	sp|Q9H2P0|ADNP_HUMAN	Q9H2P0	ADNP	Activity-dependent neuroprotector homeobox protein OS=Homo sapiens OX=9606 GN=ADNP PE=1 SV=1	24	0.00131161	66.2569	[4] Phospho (ST)	1	PSRLNQS*PSLAPV	709	sp|Q9H2P0|ADNP_HUMAN	136300	96251.3	94967.2	90606.4	125327	126079	96251.3	125327	0.215269	0.17777	0.380815	0	0.333333	0.834789	0.906846	0.834789	0.906846
LNQSPSLAPVKR	sp|Q9H2P0|ADNP_HUMAN	Q9H2P0	ADNP	Activity-dependent neuroprotector homeobox protein OS=Homo sapiens OX=9606 GN=ADNP PE=1 SV=1	36.22	0.000458169	55.3432	[4] Phospho (ST)	1	PSRLNQS*PSLAPV	709	sp|Q9H2P0|ADNP_HUMAN	76822.1	73000	58752.8	68062	74443.8	141043	73000	74443.8	0.136968	0.427645	0.0282554	0	0	0.36602	0.556578	0.36602	0.556578
LSNPQIEWQNSTIDSEDGEQFDNMTDGVAEPMHGSLAGVK	sp|Q9H2P0|ADNP_HUMAN	Q9H2P0	ADNP	Activity-dependent neuroprotector homeobox protein OS=Homo sapiens OX=9606 GN=ADNP PE=1 SV=1	17.61	0.00153158	93.5316	[15] Phospho (ST)|[24] Oxidation (M)|[32] Oxidation (M)	3	QNSTIDS*EDGEQF,GEQFDNM*TDGVAE,DGVAEPM*HGSLAG	107110801088	sp|Q9H2P0|ADNP_HUMAN	69839.6	59298.9	51391.1	5397.3	131278	2909.84	59298.9	5397.3	0.153806	1.57766	-3.4577	0	0	0.181526	0.373175	0.181526	0.373175
NVHSEDFENR	sp|Q9H2P0|ADNP_HUMAN	Q9H2P0	ADNP	Activity-dependent neuroprotector homeobox protein OS=Homo sapiens OX=9606 GN=ADNP PE=1 SV=1	38.95	0.000490004	31.4161	[4] Phospho (ST)	1	HFRNVHS*EDFENR	98	sp|Q9H2P0|ADNP_HUMAN	1.06284e+06	875555	605098	1.56412e+06	963300	1.4476e+06	875555	1.4476e+06	0.271429	0.240465	0.725393	0	0	0.123593	0.29736	0.123593	0.29736
VIPEDASESEEKLDQK	sp|Q9H2P0|ADNP_HUMAN	Q9H2P0	ADNP	Activity-dependent neuroprotector homeobox protein OS=Homo sapiens OX=9606 GN=ADNP PE=1 SV=1	85.81	0.000315956	59.2759	[7] Phospho (ST)	1	VIPEDAS*ESEEKL	921	sp|Q9H2P0|ADNP_HUMAN	1.63151e+06	1.21501e+06	1.12836e+06	2.66852e+06	1.7657e+06	1.77062e+07	1.21501e+06	2.66852e+06	0.203019	1.21326	1.13506	0	0	0.106892	0.272858	0.106892	0.272858
VIPEDASESEEKLDQKEDGSK	sp|Q9H2P0|ADNP_HUMAN	Q9H2P0	ADNP	Activity-dependent neuroprotector homeobox protein OS=Homo sapiens OX=9606 GN=ADNP PE=1 SV=1	24.17	0.0013178	54.7322	[7] Phospho (ST)	1	VIPEDAS*ESEEKL	921	sp|Q9H2P0|ADNP_HUMAN	689205	669325	613034	1.17771e+06	773739	433960	669325	773739	0.0601192	0.468267	0.209141	0	0	0.718975	0.832481	0.718975	0.832481
YSLQSANASSLSSGQLKSPSLSQSQASR	sp|Q9H2P0|ADNP_HUMAN	Q9H2P0	ADNP	Activity-dependent neuroprotector homeobox protein OS=Homo sapiens OX=9606 GN=ADNP PE=1 SV=1	87.35	0	82.2512	[18] Phospho (ST)	1	SSGQLKS*PSLSQS	409	sp|Q9H2P0|ADNP_HUMAN	347794	369986	337934	108301	102313	98261.8	347794	102313	0.0466505	0.0490532	-1.76525	0	0	0.000427816	0.0196572	0.000427816	0.0196572
DKKDEEEDMSLD	sp|Q16186|ADRM1_HUMAN	Q16186	ADRM1	Proteasomal ubiquitin receptor ADRM1 OS=Homo sapiens OX=9606 GN=ADRM1 PE=1 SV=2	11.68	0.00183231	44.8539	[10] Phospho (ST)	1	DEEEDMS*LD	405	sp|Q16186|ADRM1_HUMAN	362814	576601	899451	285299	407371	319520	576601	319520	0.440749	0.186632	-0.85167	0	0	0.113733	0.282958	0.113733	0.282958
DKKDEEEDMSLD	sp|Q16186|ADRM1_HUMAN	Q16186	ADRM1	Proteasomal ubiquitin receptor ADRM1 OS=Homo sapiens OX=9606 GN=ADRM1 PE=1 SV=2	39.3	0.000494218	24.6042	[9] Oxidation (M)|[10] Phospho (ST)	2	KDEEEDM*SLD,DEEEDMS*LD	404405	sp|Q16186|ADRM1_HUMAN	244285	14504.7	97383	12146.4	199721	55082.2	97383	55082.2	0.980147	1.10442	-0.822082	0	0	0.761883	0.860761	0.761883	0.860761
SQSAAVTPSSTTSSTR	sp|Q16186|ADRM1_HUMAN	Q16186	ADRM1	Proteasomal ubiquitin receptor ADRM1 OS=Homo sapiens OX=9606 GN=ADRM1 PE=1 SV=2	57.13	0.000153563	31.5731	[7] Phospho (ST)	1	SQSAAVT*PSSTTS	217	sp|Q16186|ADRM1_HUMAN	233627	323920	197925	290893	196770	1.23412e+06	233627	290893	0.257874	0.999563	0.316284	0	0	0.355882	0.547517	0.355882	0.547517
AAGGDHGSPDSYR	sp|P30566|PUR8_HUMAN	P30566	ADSL	Adenylosuccinate lyase OS=Homo sapiens OX=9606 GN=ADSL PE=1 SV=2	66.18	0.000191498	35.1372	[N-term] Acetyl (Protein N-term)|[8] Phospho (ST)	2	MA*AGGDHG,AGGDHGS*PDSYRS	2,9	sp|P30566|PUR8_HUMAN	5.02081e+06	5.1185e+06	5.48876e+06	4.13425e+06	670131	1.32803e+06	5.1185e+06	1.32803e+06	0.0473862	0.900007	-1.94643	0	0	0.0465316	0.172276	0.0465316	0.172276
AAGGDHGSPDSYRSPLASR	sp|P30566|PUR8_HUMAN	P30566	ADSL	Adenylosuccinate lyase OS=Homo sapiens OX=9606 GN=ADSL PE=1 SV=2	12.45	0.00185435	63.3123	[N-term] Acetyl (Protein N-term)|[8] Phospho (ST)	2	MA*AGGDHG,AGGDHGS*PDSYRS	2,9	sp|P30566|PUR8_HUMAN	11479.5	32064.6	8641.78	2743.6	973.35	152145	11479.5	2743.6	0.734851	1.67018	-2.06492	0	0	0.631871	0.7714	0.631871	0.7714
LSPLPPGSPGSAAR	sp|Q6ZN18|AEBP2_HUMAN	Q6ZN18	AEBP2	Zinc finger protein AEBP2 OS=Homo sapiens OX=9606 GN=AEBP2 PE=1 SV=2	25.93	0.00122522	74.2734	[8] Phospho (ST)	1	SPLPPGS*PGSAAR	24	sp|Q6ZN18|AEBP2_HUMAN	298768	238163	267920	537666	664922	863559	267920	664922	0.112955	0.238479	1.31138	0	0	0.00496394	0.0557945	0.00496394	0.0557945
RGSLEMSSDGEPLSR	sp|Q6ZN18|AEBP2_HUMAN	Q6ZN18	AEBP2	Zinc finger protein AEBP2 OS=Homo sapiens OX=9606 GN=AEBP2 PE=1 SV=2	105.24	0	64.2023	[3] Phospho (ST)	1	SGGRRGS*LEMSSD	206	sp|Q6ZN18|AEBP2_HUMAN	1.56404e+06	1.28506e+06	1.38452e+06	1.5297e+06	1.80344e+06	2.31118e+06	1.38452e+06	1.80344e+06	0.100191	0.210762	0.381369	0	0	0.21504	0.412976	0.21504	0.412976
SLSPGAASSSSGDGDGKEGLEEPK	sp|Q6ZN18|AEBP2_HUMAN	Q6ZN18	AEBP2	Zinc finger protein AEBP2 OS=Homo sapiens OX=9606 GN=AEBP2 PE=1 SV=2	156.58	0	56.4462	[3] Phospho (ST)	1	DETRSLS*PGAASS	141	sp|Q6ZN18|AEBP2_HUMAN	778512	534018	831022	1.05705e+06	1.05893e+06	1.46097e+06	778512	1.05893e+06	0.221837	0.195135	0.44382	0	0	0.0594618	0.197402	0.0594618	0.197402
SLSPGAASSSSGDGDGKEGLEEPKGPR	sp|Q6ZN18|AEBP2_HUMAN	Q6ZN18	AEBP2	Zinc finger protein AEBP2 OS=Homo sapiens OX=9606 GN=AEBP2 PE=1 SV=2	34	0.000520382	55.1216	[3] Phospho (ST)	1	DETRSLS*PGAASS	141	sp|Q6ZN18|AEBP2_HUMAN	120576	115671	167456	202801	232303	513963	120576	232303	0.212441	0.542958	0.946062	0	0	0.0485849	0.176691	0.0485849	0.176691
EAYSGCSGPVDSECPPPPSSPVHK	sp|Q8N556|AFAP1_HUMAN	Q8N556	AFAP1	Actin filament-associated protein 1 OS=Homo sapiens OX=9606 GN=AFAP1 PE=1 SV=2	106.61	0	59.5498	[20] Phospho (ST)	1	CPPPPSS*PVHKAE	265	sp|Q8N556|AFAP1_HUMAN	2.89624e+06	2.14285e+06	2.21597e+06	6.90386e+06	4.53137e+06	1.79645e+06	2.21597e+06	4.53137e+06	0.1718	0.579484	1.03201	0	0	0.26835	0.471804	0.26835	0.471804
KLSSERPSSDGEGVVENGITTCNGK	sp|Q8N556|AFAP1_HUMAN	Q8N556	AFAP1	Actin filament-associated protein 1 OS=Homo sapiens OX=9606 GN=AFAP1 PE=1 SV=2	60.48	0.000166362	61.7498	[8] Phospho (ST)	1	LSSERPS*SDGEGV	282	sp|Q8N556|AFAP1_HUMAN	125045	180174	218989	336733	271011	565027	180174	336733	0.270164	0.39475	0.902215	0	0	0.0347861	0.1469	0.0347861	0.1469
SGTSSPQSPVFR	sp|Q8N556|AFAP1_HUMAN	Q8N556	AFAP1	Actin filament-associated protein 1 OS=Homo sapiens OX=9606 GN=AFAP1 PE=1 SV=2	20.85	0.00143034	59.1125	[5] Phospho (ST)|[8] Phospho (ST)	2	PKSGTSS*PQSPVF,GTSSPQS*PVFRHR	665668	sp|Q8N556|AFAP1_HUMAN	91781.6	92888.5	83131.8	102965	65144.8	1.2107e+06	91781.6	102965	0.0598459	1.41588	0.165879	0	0	0.342777	0.535938	0.342777	0.535938
SGTSSPQSPVFR	sp|Q8N556|AFAP1_HUMAN	Q8N556	AFAP1	Actin filament-associated protein 1 OS=Homo sapiens OX=9606 GN=AFAP1 PE=1 SV=2	46.91	0.000119076	55.9523	[8] Phospho (ST)	1	GTSSPQS*PVFRHR	668	sp|Q8N556|AFAP1_HUMAN	1.71811e+06	1.82565e+06	1.65832e+06	2.78584e+06	3.36238e+06	3.57297e+06	1.71811e+06	3.36238e+06	0.0489007	0.125756	0.968665	0	0	0.0139958	0.0887764	0.0139958	0.0887764
TGSNAAQYK	sp|Q8N556|AFAP1_HUMAN	Q8N556	AFAP1	Actin filament-associated protein 1 OS=Homo sapiens OX=9606 GN=AFAP1 PE=1 SV=2	27	0.00103275	20.8998	[3] Phospho (ST)	1	VVKRTGS*NAAQYK	548	sp|Q8N556|AFAP1_HUMAN	2089.17	2013.85	10834.9	22875.8	41253.6	81246.9	2089.17	41253.6	1.01846	0.615887	4.30352	0	0	0.00639479	0.0617523	0.00639479	0.0617523
DMPEDDGEPSKGASPELAK	sp|Q8TED9|AF1L1_HUMAN	Q8TED9	AFAP1L1	Actin filament-associated protein 1-like 1 OS=Homo sapiens OX=9606 GN=AFAP1L1 PE=1 SV=2	12.82	0.00186652	56.2894	[14] Phospho (ST)	1	EPSKGAS*PELAKS	98	sp|Q8TED9|AF1L1_HUMAN	15898	22192	13136.5	237130	180143	236886	15898	236886	0.271803	0.150566	3.89728	0	0	4.06e-05	0.00623215	4.06e-05	0.00623215
EVSKPVGGAEGVEVPRSPVLLCK	sp|Q8TED9|AF1L1_HUMAN	Q8TED9	AFAP1L1	Actin filament-associated protein 1-like 1 OS=Homo sapiens OX=9606 GN=AFAP1L1 PE=1 SV=2	81.78	0.000284414	87.8422	[17] Phospho (ST)	1	GVEVPRS*PVLLCK	329	sp|Q8TED9|AF1L1_HUMAN	359255	371408	449824	1.79047e+06	1.62763e+06	2.04987e+06	371408	1.79047e+06	0.124929	0.116836	2.26926	0.222222	0.222222	0.000219489	0.0148158	0.000219489	0.0148158
KRSPSIVASNQGR	sp|Q8TED9|AF1L1_HUMAN	Q8TED9	AFAP1L1	Actin filament-associated protein 1-like 1 OS=Homo sapiens OX=9606 GN=AFAP1L1 PE=1 SV=2	12.61	0.00185989	25.565	[3] Phospho (ST)	1	SELRKRS*PSIVAS	745	sp|Q8TED9|AF1L1_HUMAN	64.3053	64.3053	64.3053	3700.46	7109.89	3561.36	64.3053	3700.46	0	0.419531	5.84662	1	0	4.86e-06	0.00150073	4.86e-06	0.00150073
SPEYISSHNGCSPSHSIVDGYYEDADSSYPATR	sp|Q8TED9|AF1L1_HUMAN	Q8TED9	AFAP1L1	Actin filament-associated protein 1-like 1 OS=Homo sapiens OX=9606 GN=AFAP1L1 PE=1 SV=2	34.54	0.000526732	85.4303	[12] Phospho (ST)	1	SSHNGCS*PSHSIV	149	sp|Q8TED9|AF1L1_HUMAN	81022.6	56654	46644.2	645388	412691	503298	56654	503298	0.28779	0.225367	3.15116	0	0.333333	0.000155995	0.0126164	0.000155995	0.0126164
AVTPASAPDCTPVNSATTLK	sp|Q8N4X5|AF1L2_HUMAN	Q8N4X5	AFAP1L2	Actin filament-associated protein 1-like 2 OS=Homo sapiens OX=9606 GN=AFAP1L2 PE=1 SV=1	49.33	0.00012721	78.2258	[3] Phospho (ST)	1	PRPKAVT*PASAPD	774	sp|Q8N4X5|AF1L2_HUMAN	64.3053	64.3053	64.3053	64.3053	2833.38	124.995	64.3053	124.995	0	1.56963	0.958863	1	0.333333	0.191745	0.385641	0.191745	0.385641
KKSTSLEPVER	sp|Q8N4X5|AF1L2_HUMAN	Q8N4X5	AFAP1L2	Actin filament-associated protein 1-like 2 OS=Homo sapiens OX=9606 GN=AFAP1L2 PE=1 SV=1	43.51	0.000219853	32.3881	[5] Phospho (ST)	1	GRKKSTS*LEPVER	346	sp|Q8N4X5|AF1L2_HUMAN	186780	931194	165466	532273	241413	67127.5	186780	241413	1.0193	0.838456	0.370163	0	0	0.594836	0.743001	0.594836	0.743001
VYLDLTPVK	sp|Q8N4X5|AF1L2_HUMAN	Q8N4X5	AFAP1L2	Actin filament-associated protein 1-like 2 OS=Homo sapiens OX=9606 GN=AFAP1L2 PE=1 SV=1	33.77	0.000517598	93.9685	[6] Phospho (ST)	1	RVYLDLT*PVKSFL	541	sp|Q8N4X5|AF1L2_HUMAN	64.3053	64.3053	64.3053	64.3053	64.3053	234.198	64.3053	64.3053	0	0.81107	0	1	0.666667	0.324301	0.518633	0.324301	0.518633
ADHRSSPNVANQPPSPGGK	sp|P55196|AFAD_HUMAN	P55196	AFDN	Afadin OS=Homo sapiens OX=9606 GN=AFDN PE=1 SV=3	26.66	0.00117156	33.4546	[6] Phospho (ST)|[15] Phospho (ST)	2	RADHRSS*PNVANQ,VANQPPS*PGGKSA	11731182	sp|P55196|AFAD_HUMAN	4231.35	11727.9	1294.38	3410.17	64.3053	64.3053	4231.35	64.3053	0.9355	1.63763	-6.04004	0	0.666667	0.0692228	0.21353	0.0692228	0.21353
DYEPPSPSPAPGAPPPPPQR	sp|P55196|AFAD_HUMAN	P55196	AFDN	Afadin OS=Homo sapiens OX=9606 GN=AFDN PE=1 SV=3	93.87	0	72.1713	[6] Phospho (ST)	1	RDYEPPS*PSPAPG	1696	sp|P55196|AFAD_HUMAN	942084	663213	676690	1.32041e+06	1.15315e+06	3.8897e+06	676690	1.32041e+06	0.206741	0.723187	0.96442	0	0	0.060887	0.199193	0.060887	0.199193
EELSSGDSLSPDPWK	sp|P55196|AFAD_HUMAN	P55196	AFDN	Afadin OS=Homo sapiens OX=9606 GN=AFDN PE=1 SV=3	69.96	0.00020982	89.3325	[10] Phospho (ST)	1	SSGDSLS*PDPWKR	1512	sp|P55196|AFAD_HUMAN	8763.33	119.916	14472.8	266.304	1126.03	33613.5	8763.33	1126.03	0.928185	1.62913	-2.96023	0	0	0.941079	0.968502	0.941079	0.968502
EYFTFPASK	sp|P55196|AFAD_HUMAN	P55196	AFDN	Afadin OS=Homo sapiens OX=9606 GN=AFDN PE=1 SV=3	17.65	0.00153243	86.2422	[2] Phospho (Y)	1	QTYTREY*FTFPAS	1230	sp|P55196|AFAD_HUMAN	10915.1	13272.3	5784.5	64.3053	64.3053	315.566	10915.1	64.3053	0.383213	0.979782	-7.40717	0	0.666667	0.000202998	0.0145597	0.000202998	0.0145597
ITSVSTGNLCTEEQTPPPRPEAYPIPTQTYTR	sp|P55196|AFAD_HUMAN	P55196	AFDN	Afadin OS=Homo sapiens OX=9606 GN=AFDN PE=1 SV=3	25.76	0.00122013	90.6965	[15] Phospho (ST)	1	LCTEEQT*PPPRPE	1211	sp|P55196|AFAD_HUMAN	2.52405e+06	2.71017e+06	2.77745e+06	3.35975e+06	3.37362e+06	3.33792e+06	2.71017e+06	3.35975e+06	0.0491508	0.00536109	0.309969	0	0	0.215711	0.414135	0.215711	0.414135
ITSVSTGNLCTEEQTPPPRPEAYPIPTQTYTR	sp|P55196|AFAD_HUMAN	P55196	AFDN	Afadin OS=Homo sapiens OX=9606 GN=AFDN PE=1 SV=3	39.4	0.00049554	91.347	[5] Phospho (ST)	1	AKITSVS*TGNLCT	1201	sp|P55196|AFAD_HUMAN	1.12892e+06	1.36466e+06	1.29183e+06	1.46198e+06	722686	530678	1.29183e+06	722686	0.0956632	0.543271	-0.837976	0	0	0.218719	0.417369	0.218719	0.417369
KSDSDMWINQSSSLDSSTSSQEHLNHSSK	sp|P55196|AFAD_HUMAN	P55196	AFDN	Afadin OS=Homo sapiens OX=9606 GN=AFDN PE=1 SV=3	12	0.00184141	67.4552	[2] Phospho (ST)|[6] Oxidation (M)|[28] Phospho (ST)	3	AAMDRKS*DSDMWI,RKSDSDM*WINQSS,EHLNHSS*KSVTPA	130013041326	sp|P55196|AFAD_HUMAN	1395.74	2730.67	7706.22	43954.7	352244	32398.1	2730.67	43954.7	0.843176	1.26986	4.00869	0	0.333333	0.00676964	0.0634409	0.00676964	0.0634409
KSDSDMWINQSSSLDSSTSSQEHLNHSSK	sp|P55196|AFAD_HUMAN	P55196	AFDN	Afadin OS=Homo sapiens OX=9606 GN=AFDN PE=1 SV=3	20.9	0.00143183	71.4871	[28] Phospho (ST)	1	EHLNHSS*KSVTPA	1326	sp|P55196|AFAD_HUMAN	401976	305850	338123	278629	263822	120814	338123	263822	0.140314	0.394208	-0.357983	0	0	0.127975	0.303083	0.127975	0.303083
KSDSDMWINQSSSLDSSTSSQEHLNHSSK	sp|P55196|AFAD_HUMAN	P55196	AFDN	Afadin OS=Homo sapiens OX=9606 GN=AFDN PE=1 SV=3	72.85	0.000226244	64.5039	[6] Oxidation (M)|[20] Phospho (ST)	2	RKSDSDM*WINQSS,LDSSTSS*QEHLNH	13041318	sp|P55196|AFAD_HUMAN	80379.7	59307.3	33007.3	14443.4	64804.4	76921	59307.3	64804.4	0.412305	0.636471	0.127882	0	0	0.639159	0.777097	0.639159	0.777097
LFSQGQDVSNK	sp|P55196|AFAD_HUMAN	P55196	AFDN	Afadin OS=Homo sapiens OX=9606 GN=AFDN PE=1 SV=3	49.8	0.000128518	66.3512	[3] Phospho (ST)	1	ERQRLFS*QGQDVS	1799	sp|P55196|AFAD_HUMAN	212557	213965	219062	45053.5	23023.8	33951.7	213965	33951.7	0.0159037	0.323878	-2.65582	0	0	0.000263554	0.0161088	0.000263554	0.0161088
QASDKDDRPFQGEDVENSR	sp|P55196|AFAD_HUMAN	P55196	AFDN	Afadin OS=Homo sapiens OX=9606 GN=AFDN PE=1 SV=3	18.09	0.00154502	47.4642	[3] Phospho (ST)	1	EALRQAS*DKDDRP	181	sp|P55196|AFAD_HUMAN	63507.9	72465.7	92992.9	79042.6	49076.1	49814.7	72465.7	49814.7	0.198056	0.288175	-0.540728	0	0	0.295914	0.493974	0.295914	0.493974
QGAIYHGLATLLNQPSPMMQR	sp|P55196|AFAD_HUMAN	P55196	AFDN	Afadin OS=Homo sapiens OX=9606 GN=AFDN PE=1 SV=3	10.51	0.00179954	97.3951	[16] Phospho (ST)	1	TLLNQPS*PMMQRI	1107	sp|P55196|AFAD_HUMAN	907113	1.10985e+06	1.13509e+06	997575	534420	834970	1.10985e+06	834970	0.118947	0.29782	-0.410568	0	0	0.230982	0.431111	0.230982	0.431111
QGAIYHGLATLLNQPSPMMQR	sp|P55196|AFAD_HUMAN	P55196	AFDN	Afadin OS=Homo sapiens OX=9606 GN=AFDN PE=1 SV=3	37.06	0.000468165	95.977	[16] Phospho (ST)|[18] Oxidation (M)|[19] Oxidation (M)	3	TLLNQPS*PMMQRI,LNQPSPM*MQRISD,NQPSPMM*QRISDR	110711091110	sp|P55196|AFAD_HUMAN	468522	566346	454079	665920	380366	387374	468522	387374	0.12306	0.340833	-0.274389	0	0	0.77889	0.871415	0.77889	0.871415
SDSDMWINQSSSLDSSTSSQEHLNHSSK	sp|P55196|AFAD_HUMAN	P55196	AFDN	Afadin OS=Homo sapiens OX=9606 GN=AFDN PE=1 SV=3	37.41	0.000471876	70.6771	[5] Oxidation (M)|[18] Phospho (ST)	2	RKSDSDM*WINQSS,SLDSSTS*SQEHLN	13041317	sp|P55196|AFAD_HUMAN	215308	109935	163913	113871	63219	75005.7	163913	75005.7	0.323159	0.315416	-1.12786	0	0	0.056812	0.192415	0.056812	0.192415
SQDADSPGSSGAPENLTFK	sp|P55196|AFAD_HUMAN	P55196	AFDN	Afadin OS=Homo sapiens OX=9606 GN=AFDN PE=1 SV=3	164.35	0	77.9526	[6] Phospho (ST)	1	KSQDADS*PGSSGA	1779	sp|P55196|AFAD_HUMAN	4.30106e+06	3.48269e+06	3.71075e+06	5.75936e+06	5.49842e+06	3.14033e+06	3.71075e+06	5.49842e+06	0.110227	0.300599	0.567307	0	0	0.447542	0.624658	0.447542	0.624658
SQDADSPGSSGAPENLTFK	sp|P55196|AFAD_HUMAN	P55196	AFDN	Afadin OS=Homo sapiens OX=9606 GN=AFDN PE=1 SV=3	88.66	0	80.5779	[6] Phospho (ST)|[9] Phospho (ST)	2	KSQDADS*PGSSGA,DADSPGS*SGAPEN	17791782	sp|P55196|AFAD_HUMAN	706823	704157	596003	686647	524901	212978	704157	524901	0.0945094	0.507052	-0.423851	0	0	0.24124	0.441935	0.24124	0.441935
SQEELREDK	sp|P55196|AFAD_HUMAN	P55196	AFDN	Afadin OS=Homo sapiens OX=9606 GN=AFDN PE=1 SV=3	35.14	0.000535666	20.8678	[1] Phospho (ST)	1	IQRVTRS*QEELRE	1275	sp|P55196|AFAD_HUMAN	2.45021e+06	3.84252e+06	3.2811e+06	544693	1.65581e+06	2.08051e+06	3.2811e+06	1.65581e+06	0.219501	0.555753	-0.986643	0	0	0.0620739	0.201329	0.0620739	0.201329
SSDGRPDSGGTLR	sp|P55196|AFAD_HUMAN	P55196	AFDN	Afadin OS=Homo sapiens OX=9606 GN=AFDN PE=1 SV=3	34.46	0.000525578	25.1927	[8] Phospho (ST)	1	SDGRPDS*GGTLRI	246	sp|P55196|AFAD_HUMAN	1.43071e+06	2.05246e+06	1.58147e+06	1.2864e+06	1.83111e+06	2.48204e+06	1.58147e+06	1.83111e+06	0.192114	0.320709	0.211454	0	0	0.766253	0.863489	0.766253	0.863489
SSPNVANQPPSPGGK	sp|P55196|AFAD_HUMAN	P55196	AFDN	Afadin OS=Homo sapiens OX=9606 GN=AFDN PE=1 SV=3	55.05	0.000145794	37.8239	[11] Phospho (ST)	1	VANQPPS*PGGKSA	1182	sp|P55196|AFAD_HUMAN	1.20413e+07	1.56544e+07	1.19218e+07	1.27523e+07	1.4244e+07	1.74111e+07	1.20413e+07	1.4244e+07	0.160637	0.160721	0.24236	0	0	0.582215	0.733418	0.582215	0.733418
SSPNVANQPPSPGGK	sp|P55196|AFAD_HUMAN	P55196	AFDN	Afadin OS=Homo sapiens OX=9606 GN=AFDN PE=1 SV=3	101.31	0	40.9932	[2] Phospho (ST)|[11] Phospho (ST)	2	RADHRSS*PNVANQ,VANQPPS*PGGKSA	11731182	sp|P55196|AFAD_HUMAN	2.95768e+06	4.06144e+06	4.79975e+06	1.3238e+06	2.08347e+06	2.79275e+06	4.06144e+06	2.08347e+06	0.235316	0.355459	-0.963005	0	0	0.0521627	0.183645	0.0521627	0.183645
SVTPASTLTK	sp|P55196|AFAD_HUMAN	P55196	AFDN	Afadin OS=Homo sapiens OX=9606 GN=AFDN PE=1 SV=3	22.12	0.00139897	53.2451	[3] Phospho (ST)	1	HSSKSVT*PASTLT	1330	sp|P55196|AFAD_HUMAN	124095	184325	150025	30401.9	11012.1	17342.5	150025	17342.5	0.197699	0.504843	-3.11281	0	0	0.000653069	0.0235889	0.000653069	0.0235889
TISNPEVVMK	sp|P55196|AFAD_HUMAN	P55196	AFDN	Afadin OS=Homo sapiens OX=9606 GN=AFDN PE=1 SV=3	40.87	0.000411269	74.5711	[3] Phospho (ST)	1	SFTRTIS*NPEVVM	216	sp|P55196|AFAD_HUMAN	1.13369e+06	1.18817e+06	1.24989e+06	428790	339867	461221	1.18817e+06	428790	0.0488334	0.153261	-1.4704	0	0	0.00134326	0.0332592	0.00134326	0.0332592
TISNPEVVMK	sp|P55196|AFAD_HUMAN	P55196	AFDN	Afadin OS=Homo sapiens OX=9606 GN=AFDN PE=1 SV=3	33.23	0.000766871	53.9847	[3] Phospho (ST)|[9] Oxidation (M)	2	SFTRTIS*NPEVVM,SNPEVVM*KRRRQQ	216222	sp|P55196|AFAD_HUMAN	1.5407e+06	986306	1.08681e+06	317728	266900	227784	1.08681e+06	266900	0.245201	0.166536	-2.02573	0	0	0.000613436	0.02303	0.000613436	0.02303
TQVLSPDSLFTAK	sp|P55196|AFAD_HUMAN	P55196	AFDN	Afadin OS=Homo sapiens OX=9606 GN=AFDN PE=1 SV=3	56.06	0.00014941	97.9272	[5] Phospho (ST)	1	LKTQVLS*PDSLFT	1721	sp|P55196|AFAD_HUMAN	198019	160100	180527	135246	110743	30001.6	180527	110743	0.105701	0.598604	-0.704997	0	0	0.101933	0.265528	0.101933	0.265528
TSSVVTLEVAK	sp|P55196|AFAD_HUMAN	P55196	AFDN	Afadin OS=Homo sapiens OX=9606 GN=AFDN PE=1 SV=3	55.97	0.000148987	79.2601	[3] Phospho (ST)	1	LMTRTSS*VVTLEV	1083	sp|P55196|AFAD_HUMAN	64958.2	51626.6	67556.9	98098.6	52529.7	26848.4	64958.2	52529.7	0.139238	0.609963	-0.306379	0	0	0.667291	0.796738	0.667291	0.796738
GYCPAKSPK	sp|P51825|AFF1_HUMAN	P51825	AFF1	AF4/FMR2 family member 1 OS=Homo sapiens OX=9606 GN=AFF1 PE=1 SV=1	17.46	0.00152681	20.7189	[7] Phospho (ST)	1	GYCPAKS*PKDLAV	245	sp|P51825|AFF1_HUMAN	377517	758240	761130	131335	187602	226333	758240	187602	0.348966	0.262815	-2.01498	0	0	0.0064232	0.0617523	0.0064232	0.0617523
LLSPLR	sp|P51825|AFF1_HUMAN	P51825	AFF1	AF4/FMR2 family member 1 OS=Homo sapiens OX=9606 GN=AFF1 PE=1 SV=1	37.31	0.000470898	86.2422	[3] Phospho (ST)	1	RDTKLLS*PLRDTP	750	sp|P51825|AFF1_HUMAN	7481.85	12529.9	6305.46	1657.36	64.3053	64.3053	7481.85	64.3053	0.376959	1.54496	-6.86231	0	0.666667	0.00815024	0.068528	0.00815024	0.068528
SCQKSPAQQEPPQR	sp|P51825|AFF1_HUMAN	P51825	AFF1	AF4/FMR2 family member 1 OS=Homo sapiens OX=9606 GN=AFF1 PE=1 SV=1	120.57	0	20.0536	[5] Phospho (ST)	1	KRSCQKS*PAQQEP	588	sp|P51825|AFF1_HUMAN	186060	299741	211212	177171	103535	421290	211212	177171	0.257005	0.710798	-0.253553	0	0	0.738511	0.845431	0.738511	0.845431
AVGMPSPVSPK	sp|Q9UHB7|AFF4_HUMAN	Q9UHB7	AFF4	AF4/FMR2 family member 4 OS=Homo sapiens OX=9606 GN=AFF4 PE=1 SV=1	26.99	0.0010326	44.9722	[4] Oxidation (M)|[9] Phospho (ST)	2	GSKAVGM*PSPVSP,GMPSPVS*PKLSPG	10531058	sp|Q9UHB7|AFF4_HUMAN	44297	53223.2	87484.6	53134.9	96018.5	77893.7	53223.2	77893.7	0.3697	0.28444	0.549453	0.166667	0.5	0.463982	0.638187	0.463982	0.638187
DPDANWDSPSR	sp|Q9UHB7|AFF4_HUMAN	Q9UHB7	AFF4	AF4/FMR2 family member 4 OS=Homo sapiens OX=9606 GN=AFF4 PE=1 SV=1	28.17	0.00106189	49.3916	[8] Phospho (ST)	1	PDANWDS*PSRVPF	222	sp|Q9UHB7|AFF4_HUMAN	273236	239503	190340	336654	298146	77844.6	239503	298146	0.177875	0.587843	0.315979	0	0	0.735508	0.843641	0.735508	0.843641
EKDLLPSPAGPVPSK	sp|Q9UHB7|AFF4_HUMAN	Q9UHB7	AFF4	AF4/FMR2 family member 4 OS=Homo sapiens OX=9606 GN=AFF4 PE=1 SV=1	26.38	0.00116423	83.1219	[7] Phospho (ST)	1	EKDLLPS*PAGPVP	814	sp|Q9UHB7|AFF4_HUMAN	190663	158776	169757	278185	205697	156112	169757	205697	0.0936002	0.287783	0.277054	0	0	0.436451	0.617376	0.436451	0.617376
EKDLLPSPAGPVPSKDPK	sp|Q9UHB7|AFF4_HUMAN	Q9UHB7	AFF4	AF4/FMR2 family member 4 OS=Homo sapiens OX=9606 GN=AFF4 PE=1 SV=1	15.19	0.00170628	76.5543	[7] Phospho (ST)	1	EKDLLPS*PAGPVP	814	sp|Q9UHB7|AFF4_HUMAN	477388	515525	445988	618788	505644	725977	477388	618788	0.0726032	0.178631	0.374283	0	0	0.249109	0.450691	0.249109	0.450691
LSPGNSGNYSSGASSASASGSSVTIPQK	sp|Q9UHB7|AFF4_HUMAN	Q9UHB7	AFF4	AF4/FMR2 family member 4 OS=Homo sapiens OX=9606 GN=AFF4 PE=1 SV=1	45.91	0.000116293	71.5704	[2] Phospho (ST)	1	PVSPKLS*PGNSGN	1062	sp|Q9UHB7|AFF4_HUMAN	68750.8	31227.4	9384.46	73026.5	22940.7	304359	31227.4	73026.5	0.823672	1.125	1.22561	0	0	0.23801	0.438388	0.23801	0.438388
MFSPMEEK	sp|Q9UHB7|AFF4_HUMAN	Q9UHB7	AFF4	AF4/FMR2 family member 4 OS=Homo sapiens OX=9606 GN=AFF4 PE=1 SV=1	13.81	0.00178069	59.8123	[1] Oxidation (M)|[3] Phospho (ST)	2	SFFRQRM*FSPMEE,FRQRMFS*PMEEKE	692694	sp|Q9UHB7|AFF4_HUMAN	80242.7	55325.9	53624.7	84481.4	71921.1	15171.2	55325.9	71921.1	0.236284	0.6457	0.378462	0	0	0.553905	0.711238	0.553905	0.711238
MFSPMEEK	sp|Q9UHB7|AFF4_HUMAN	Q9UHB7	AFF4	AF4/FMR2 family member 4 OS=Homo sapiens OX=9606 GN=AFF4 PE=1 SV=1	16.27	0.00149719	39.7982	[1] Oxidation (M)|[3] Phospho (ST)|[5] Oxidation (M)	3	SFFRQRM*FSPMEE,FRQRMFS*PMEEKE,QRMFSPM*EEKELL	692694696	sp|Q9UHB7|AFF4_HUMAN	34870	41134.9	49905.3	116243	117524	23079.3	41134.9	116243	0.179946	0.632616	1.49871	0	0	0.357372	0.548759	0.357372	0.548759
MFSPMEEK	sp|Q9UHB7|AFF4_HUMAN	Q9UHB7	AFF4	AF4/FMR2 family member 4 OS=Homo sapiens OX=9606 GN=AFF4 PE=1 SV=1	17.05	0.00151819	78.77	[3] Phospho (ST)	1	FRQRMFS*PMEEKE	694	sp|Q9UHB7|AFF4_HUMAN	62930.4	71930.6	45527.3	61115.6	65073.9	98290.4	62930.4	65073.9	0.223229	0.272849	0.0483221	0	0	0.402359	0.58926	0.402359	0.58926
NSYNNSQAPSPGLGSK	sp|Q9UHB7|AFF4_HUMAN	Q9UHB7	AFF4	AF4/FMR2 family member 4 OS=Homo sapiens OX=9606 GN=AFF4 PE=1 SV=1	78.3	0.000260281	48.8447	[10] Phospho (ST)	1	NNSQAPS*PGLGSK	1043	sp|Q9UHB7|AFF4_HUMAN	1.09119e+06	1.1967e+06	777118	795928	551114	821681	1.09119e+06	795928	0.21363	0.206574	-0.455186	0	0	0.179103	0.369979	0.179103	0.369979
SKSPRDPDANWDSPSR	sp|Q9UHB7|AFF4_HUMAN	Q9UHB7	AFF4	AF4/FMR2 family member 4 OS=Homo sapiens OX=9606 GN=AFF4 PE=1 SV=1	72.57	0.00022477	43.0476	[3] Phospho (ST)	1	EHQRSKS*PRDPDA	212	sp|Q9UHB7|AFF4_HUMAN	1.29853e+06	1.07546e+06	803096	1.87572e+06	1.50211e+06	2.53889e+06	1.07546e+06	1.87572e+06	0.234293	0.266238	0.802486	0	0	0.044013	0.166849	0.044013	0.166849
SRSSSPGKPQAVSSLNSSHSR	sp|Q9UHB7|AFF4_HUMAN	Q9UHB7	AFF4	AF4/FMR2 family member 4 OS=Homo sapiens OX=9606 GN=AFF4 PE=1 SV=1	33.53	0.000600962	36.8124	[3] Phospho (ST)|[4] Phospho (ST)	2	EHSKSRS*SSPGKP,HSKSRSS*SPGKPQ	178179	sp|Q9UHB7|AFF4_HUMAN	145931	98802.2	85813.6	172302	121506	159040	98802.2	159040	0.2871	0.174542	0.686777	0	0	0.203137	0.399452	0.203137	0.399452
SSSPGKPQAVSSLNSSHSR	sp|Q9UHB7|AFF4_HUMAN	Q9UHB7	AFF4	AF4/FMR2 family member 4 OS=Homo sapiens OX=9606 GN=AFF4 PE=1 SV=1	147.29	0	37.4919	[3] Phospho (ST)	1	SKSRSSS*PGKPQA	180	sp|Q9UHB7|AFF4_HUMAN	1.78467e+07	1.85136e+07	1.52543e+07	2.29198e+07	1.6839e+07	1.96303e+07	1.78467e+07	1.96303e+07	0.100079	0.153757	0.137422	0	0	0.49487	0.664057	0.49487	0.664057
TISQSSSLK	sp|Q9UHB7|AFF4_HUMAN	Q9UHB7	AFF4	AF4/FMR2 family member 4 OS=Homo sapiens OX=9606 GN=AFF4 PE=1 SV=1	43.5	0.000219804	37.0541	[3] Phospho (ST)	1	SRKRTIS*QSSSLK	836	sp|Q9UHB7|AFF4_HUMAN	201923	345636	172159	107591	79341.5	228442	201923	107591	0.386676	0.572001	-0.908254	0	0	0.145691	0.327699	0.145691	0.327699
VNPHKVSPASSVDSNIPSSQGYK	sp|Q9UHB7|AFF4_HUMAN	Q9UHB7	AFF4	AF4/FMR2 family member 4 OS=Homo sapiens OX=9606 GN=AFF4 PE=1 SV=1	130.57	0	64.0902	[7] Phospho (ST)	1	VNPHKVS*PASSVD	487	sp|Q9UHB7|AFF4_HUMAN	4.76851e+06	5.83222e+06	5.59901e+06	7.03378e+06	5.89943e+06	1.40708e+07	5.59901e+06	7.03378e+06	0.103539	0.49179	0.329127	0	0	0.172591	0.362306	0.172591	0.362306
VNPHKVSPASSVDSNIPSSQGYK	sp|Q9UHB7|AFF4_HUMAN	Q9UHB7	AFF4	AF4/FMR2 family member 4 OS=Homo sapiens OX=9606 GN=AFF4 PE=1 SV=1	19.24	0.00157868	66.9231	[7] Phospho (ST)|[10] Phospho (ST)|[11] Phospho (ST)	3	VNPHKVS*PASSVD,HKVSPAS*SVDSNI,KVSPASS*VDSNIP	487490491	sp|Q9UHB7|AFF4_HUMAN	415420	404313	347811	335946	339746	76100.5	404313	335946	0.0931593	0.603082	-0.267243	0	0	0.21346	0.411654	0.21346	0.411654
VNPHKVSPASSVDSNIPSSQGYKK	sp|Q9UHB7|AFF4_HUMAN	Q9UHB7	AFF4	AF4/FMR2 family member 4 OS=Homo sapiens OX=9606 GN=AFF4 PE=1 SV=1	48.07	0.000122971	56.6389	[7] Phospho (ST)	1	VNPHKVS*PASSVD	487	sp|Q9UHB7|AFF4_HUMAN	214042	263031	236635	385976	306640	109668	236635	306640	0.103063	0.53198	0.373883	0	0	0.982018	0.990612	0.982018	0.990612
YPESNRTPVKPSSVEEEDSFFR	sp|Q9UHB7|AFF4_HUMAN	Q9UHB7	AFF4	AF4/FMR2 family member 4 OS=Homo sapiens OX=9606 GN=AFF4 PE=1 SV=1	92.94	0	85.5096	[7] Phospho (ST)	1	YPESNRT*PVKPSS	674	sp|Q9UHB7|AFF4_HUMAN	2.75638e+06	3.2022e+06	3.26248e+06	3.83554e+06	2.73325e+06	2.54328e+06	3.2022e+06	2.73325e+06	0.0899397	0.22972	-0.228443	0	0	0.902348	0.945876	0.902348	0.945876
TSDDEVGSPKEESR	sp|Q6ULP2|AFTIN_HUMAN	Q6ULP2	AFTPH	Aftiphilin OS=Homo sapiens OX=9606 GN=AFTPH PE=1 SV=3	76.8	0.000250689	23.9452	[8] Phospho (ST)	1	SDDEVGS*PKEESR	382	sp|Q6ULP2|AFTIN_HUMAN	4.2848e+06	4.70707e+06	4.92903e+06	856046	4.88135e+06	363645	4.70707e+06	856046	0.0705261	1.21868	-2.45907	0	0	0.0849029	0.239756	0.0849029	0.239756
TSDDEVGSPKEESRK	sp|Q6ULP2|AFTIN_HUMAN	Q6ULP2	AFTPH	Aftiphilin OS=Homo sapiens OX=9606 GN=AFTPH PE=1 SV=3	45.26	0.000114811	19.815	[8] Phospho (ST)	1	SDDEVGS*PKEESR	382	sp|Q6ULP2|AFTIN_HUMAN	108408	94607.8	80361.3	63095.9	111250	102291	94607.8	102291	0.148465	0.27773	0.112644	0	0.333333	0.850329	0.915613	0.850329	0.915613
ATSACAPISSPK	sp|Q9UPQ3|AGAP1_HUMAN	Q9UPQ3	AGAP1	Arf-GAP with GTPase, ANK repeat and PH domain-containing protein 1 OS=Homo sapiens OX=9606 GN=AGAP1 PE=1 SV=4	31.18	0.000892857	42.1272	[10] Phospho (ST)	1	ACAPISS*PKTNGL	422	sp|Q9UPQ3|AGAP1_HUMAN	98968.2	103844	107553	83059.4	91111.8	155987	103844	91111.8	0.0416186	0.363314	-0.188711	0	0	0.928454	0.961132	0.928454	0.961132
LDPPPSPHANR	sp|Q9UPQ3|AGAP1_HUMAN	Q9UPQ3	AGAP1	Arf-GAP with GTPase, ANK repeat and PH domain-containing protein 1 OS=Homo sapiens OX=9606 GN=AGAP1 PE=1 SV=4	34.28	0.000523515	36.0248	[6] Phospho (ST)	1	KLDPPPS*PHANRK	521	sp|Q9UPQ3|AGAP1_HUMAN	1.75033e+06	2.24242e+06	1.76257e+06	2.5282e+06	2.4764e+06	3.91677e+06	1.76257e+06	2.5282e+06	0.146286	0.274751	0.52043	0	0	0.103589	0.267869	0.103589	0.267869
IETIAASSTPTPIRK	sp|Q96P47|AGAP3_HUMAN	Q96P47	AGAP3	Arf-GAP with GTPase, ANK repeat and PH domain-containing protein 3 OS=Homo sapiens OX=9606 GN=AGAP3 PE=1 SV=2	48.11	0.000123077	66.743	[9] Phospho (ST)	1	TIAASST*PTPIRK	324	sp|Q96P47|AGAP3_HUMAN	128.611	128.611	515.784	38058.7	17844.8	100161	128.611	38058.7	0.867528	0.824616	8.20907	0.833333	0.166667	0.00016782	0.0130793	0.00016782	0.0130793
LDPPPSPHSNR	sp|Q96P47|AGAP3_HUMAN	Q96P47	AGAP3	Arf-GAP with GTPase, ANK repeat and PH domain-containing protein 3 OS=Homo sapiens OX=9606 GN=AGAP3 PE=1 SV=2	17.81	0.00153733	31.2546	[6] Phospho (ST)	1	KLDPPPS*PHSNRK	538	sp|Q96P47|AGAP3_HUMAN	187432	210088	111675	854378	715747	1.3308e+06	187432	854378	0.303649	0.333636	2.18851	0	0	0.00101859	0.0284634	0.00101859	0.0284634
GTPSQSPVVGR	sp|P52594|AGFG1_HUMAN	P52594	AGFG1	Arf-GAP domain and FG repeat-containing protein 1 OS=Homo sapiens OX=9606 GN=AGFG1 PE=1 SV=2	46.8	0.000118779	37.5592	[2] Phospho (ST)	1	LHLNKGT*PSQSPV	177	sp|P52594|AGFG1_HUMAN	163904	165813	139506	8289.54	35184.7	59490.4	163904	35184.7	0.0937821	0.746218	-2.21983	0	0	0.0158698	0.0951316	0.0158698	0.0951316
GTPSQSPVVGR	sp|P52594|AGFG1_HUMAN	P52594	AGFG1	Arf-GAP domain and FG repeat-containing protein 1 OS=Homo sapiens OX=9606 GN=AGFG1 PE=1 SV=2	42.9	0.000216403	35.4237	[6] Phospho (ST)	1	KGTPSQS*PVVGRS	181	sp|P52594|AGFG1_HUMAN	3.09735e+07	4.05118e+07	3.67247e+07	1.27555e+07	1.50707e+07	1.96692e+07	3.67247e+07	1.50707e+07	0.133151	0.222281	-1.285	0	0	0.00771665	0.0670871	0.00771665	0.0670871
SLLGDSAPTLHLNKGTPSQSPVVGR	sp|P52594|AGFG1_HUMAN	P52594	AGFG1	Arf-GAP domain and FG repeat-containing protein 1 OS=Homo sapiens OX=9606 GN=AGFG1 PE=1 SV=2	74.69	0.000237304	92.2893	[16] Phospho (ST)|[20] Phospho (ST)	2	LHLNKGT*PSQSPV,KGTPSQS*PVVGRS	177181	sp|P52594|AGFG1_HUMAN	3.45038e+06	3.66809e+06	4.17088e+06	1.77239e+06	2.06506e+06	2.15881e+06	3.66809e+06	2.06506e+06	0.098199	0.100846	-0.828845	0	0	0.0130747	0.0857	0.0130747	0.0857
SSSADFGTFNTSQSHQTASAVSK	sp|P52594|AGFG1_HUMAN	P52594	AGFG1	Arf-GAP domain and FG repeat-containing protein 1 OS=Homo sapiens OX=9606 GN=AGFG1 PE=1 SV=2	52.95	0.000138485	69.7741	[3] Phospho (ST)	1	NFPKSSS*ADFGTF	293	sp|P52594|AGFG1_HUMAN	2.17187e+06	1.99071e+06	2.19362e+06	4.22714e+06	2.61142e+06	4.91864e+06	2.17187e+06	4.22714e+06	0.0525809	0.302128	0.960746	0	0	0.0479362	0.175402	0.0479362	0.175402
VVASVHASISGSSASSTSSTPEVKPLK	sp|P52594|AGFG1_HUMAN	P52594	AGFG1	Arf-GAP domain and FG repeat-containing protein 1 OS=Homo sapiens OX=9606 GN=AGFG1 PE=1 SV=2	21.82	0.00139091	74.1856	[13] Phospho (ST)	1	ASISGSS*ASSTSS	147	sp|P52594|AGFG1_HUMAN	21387	25265.2	22895.5	3108.91	10495.1	2998.3	22895.5	3108.91	0.084331	0.776403	-2.88058	0	0	0.00678512	0.0634894	0.00678512	0.0634894
VVASVHASISGSSASSTSSTPEVKPLK	sp|P52594|AGFG1_HUMAN	P52594	AGFG1	Arf-GAP domain and FG repeat-containing protein 1 OS=Homo sapiens OX=9606 GN=AGFG1 PE=1 SV=2	60.04	0.000164663	72.1213	[20] Phospho (ST)	1	ASSTSST*PEVKPL	154	sp|P52594|AGFG1_HUMAN	19610.2	10449.2	15390.9	22189.6	16612.5	82048	15390.9	22189.6	0.302653	0.900534	0.52781	0	0	0.165037	0.352399	0.165037	0.352399
IGIHHKNSPPK	sp|Q8N302|AGGF1_HUMAN	Q8N302	AGGF1	Angiogenic factor with G patch and FHA domains 1 OS=Homo sapiens OX=9606 GN=AGGF1 PE=1 SV=2	11.11	0.00181638	18.972	[8] Phospho (ST)	1	GIHHKNS*PPKVTV	329	sp|Q8N302|AGGF1_HUMAN	51418.9	53577.5	50486.3	87041.5	115187	96750.4	51418.9	96750.4	0.0305937	0.143452	0.911968	0	0	0.0120843	0.0826703	0.0120843	0.0826703
VTVPTSGNTIESPLHENISNSTSFKDEK	sp|Q8N302|AGGF1_HUMAN	Q8N302	AGGF1	Angiogenic factor with G patch and FHA domains 1 OS=Homo sapiens OX=9606 GN=AGGF1 PE=1 SV=2	21.36	0.00137841	85.9039	[12] Phospho (ST)	1	SGNTIES*PLHENI	344	sp|Q8N302|AGGF1_HUMAN	460857	376730	507639	371291	668039	1.58678e+06	460857	668039	0.147938	0.723938	0.535613	0	0	0.260777	0.463752	0.260777	0.463752
RAASAATAAPTATPAAQESGTIPK	sp|O00116|ADAS_HUMAN	O00116	AGPS	Alkyldihydroxyacetonephosphate synthase, peroxisomal OS=Homo sapiens OX=9606 GN=AGPS PE=1 SV=1	23.66	0.00130316	64.9055	[7] Phospho (ST)	1	RAASAAT*AAPTAT	68	sp|O00116|ADAS_HUMAN	170700	149713	202264	400863	262074	517477	170700	400863	0.151828	0.324959	1.23164	0	0	0.0204236	0.108936	0.0204236	0.108936
VTSPTTYVLDEDEPR	sp|Q9UPW5|CBPC1_HUMAN	Q9UPW5	AGTPBP1	Cytosolic carboxypeptidase 1 OS=Homo sapiens OX=9606 GN=AGTPBP1 PE=1 SV=3	115.53	0	87.5671	[3] Phospho (ST)	1	SSCKVTS*PTTYVL	1168	sp|Q9UPW5|CBPC1_HUMAN	308168	289480	306633	193949	37845.7	67384.1	306633	67384.1	0.0344182	0.831527	-2.18603	0	0	0.0240696	0.118742	0.0240696	0.118742
CLVAGLLSPR	sp|Q8WYP5|ELYS_HUMAN	Q8WYP5	AHCTF1	Protein ELYS OS=Homo sapiens OX=9606 GN=AHCTF1 PE=1 SV=3	46.04	0.00011655	96.1711	[8] Phospho (ST)	1	LVAGLLS*PRFVDV	528	sp|Q8WYP5|ELYS_HUMAN	18153.2	14766.9	24912.1	11823.6	4457.96	8710.89	18153.2	8710.89	0.267939	0.443835	-1.05933	0	0	0.0339483	0.144617	0.0339483	0.144617
ESAWSPPPIEIR	sp|Q8WYP5|ELYS_HUMAN	Q8WYP5	AHCTF1	Protein ELYS OS=Homo sapiens OX=9606 GN=AHCTF1 PE=1 SV=3	24.81	0.00126859	96.6256	[5] Phospho (ST)	1	EKESAWS*PPPIEI	2212	sp|Q8WYP5|ELYS_HUMAN	11700.6	12707	12659.6	64.3053	6044.5	64.3053	12659.6	64.3053	0.0459563	1.67792	-7.62108	0	0.666667	0.0295544	0.132757	0.0295544	0.132757
ETRISFVEEDVHPK	sp|Q8WYP5|ELYS_HUMAN	Q8WYP5	AHCTF1	Protein ELYS OS=Homo sapiens OX=9606 GN=AHCTF1 PE=1 SV=3	26.21	0.00116051	78.5572	[5] Phospho (ST)	1	LKETRIS*FVEEDV	1232	sp|Q8WYP5|ELYS_HUMAN	55363.3	84762.5	69263	66640.3	26931.2	137312	69263	66640.3	0.210711	0.726463	-0.055691	0	0	0.842211	0.910855	0.842211	0.910855
EVSPSDVR	sp|Q8WYP5|ELYS_HUMAN	Q8WYP5	AHCTF1	Protein ELYS OS=Homo sapiens OX=9606 GN=AHCTF1 PE=1 SV=3	26.91	0.0011044	36.1304	[3] Phospho (ST)	1	VRGREVS*PSDVRE	1944	sp|Q8WYP5|ELYS_HUMAN	1.27883e+06	2.45159e+06	1.47401e+06	1.20126e+06	1.14246e+06	1.95531e+06	1.47401e+06	1.20126e+06	0.362215	0.316313	-0.295205	0	0	0.535323	0.697022	0.535323	0.697022
GLSQNQQIPQNSVTPR	sp|Q8WYP5|ELYS_HUMAN	Q8WYP5	AHCTF1	Protein ELYS OS=Homo sapiens OX=9606 GN=AHCTF1 PE=1 SV=3	29.06	0.00100565	59.2759	[14] Phospho (ST)	1	IPQNSVT*PRRGRR	1808	sp|Q8WYP5|ELYS_HUMAN	8706.35	8472.77	8330.49	16718.2	12164.5	42310.1	8472.77	16718.2	0.0223172	0.684775	0.980514	0	0	0.0510524	0.181484	0.0510524	0.181484
GREVSPSDVR	sp|Q8WYP5|ELYS_HUMAN	Q8WYP5	AHCTF1	Protein ELYS OS=Homo sapiens OX=9606 GN=AHCTF1 PE=1 SV=3	24.83	0.00126886	32.8254	[5] Phospho (ST)	1	VRGREVS*PSDVRE	1944	sp|Q8WYP5|ELYS_HUMAN	1.55534e+06	2.2369e+06	1.99833e+06	1.04403e+06	878561	1.56521e+06	1.99833e+06	1.04403e+06	0.179179	0.308231	-0.936625	0	0	0.070492	0.215715	0.070492	0.215715
ISFVEEDVHPK	sp|Q8WYP5|ELYS_HUMAN	Q8WYP5	AHCTF1	Protein ELYS OS=Homo sapiens OX=9606 GN=AHCTF1 PE=1 SV=3	54.85	0.000145054	76.9865	[2] Phospho (ST)	1	LKETRIS*FVEEDV	1232	sp|Q8WYP5|ELYS_HUMAN	20967.7	35209.9	30872.6	34781.9	7042.62	191076	30872.6	34781.9	0.251588	1.27803	0.172008	0	0.333333	0.783515	0.874513	0.783515	0.874513
LEAQDSGEEAR	sp|Q8WYP5|ELYS_HUMAN	Q8WYP5	AHCTF1	Protein ELYS OS=Homo sapiens OX=9606 GN=AHCTF1 PE=1 SV=3	14.65	0.00174876	23.1162	[6] Phospho (ST)	1	KLEAQDS*GEEARN	1533	sp|Q8WYP5|ELYS_HUMAN	18414.7	32370.6	39361.8	4600.79	7008.94	16821.5	32370.6	7008.94	0.354913	0.683061	-2.20742	0	0	0.0240623	0.118742	0.0240623	0.118742
LEVFTTPKK	sp|Q8WYP5|ELYS_HUMAN	Q8WYP5	AHCTF1	Protein ELYS OS=Homo sapiens OX=9606 GN=AHCTF1 PE=1 SV=3	19.21	0.00157768	65.7269	[6] Phospho (ST)	1	KLEVFTT*PKKCAV	1257	sp|Q8WYP5|ELYS_HUMAN	2223.73	1380.97	2283.13	64.3053	64.3053	64.3053	2223.73	64.3053	0.257103	0	-5.1119	0	1	7.11e-06	0.00193072	7.11e-06	0.00193072
PSQCSEFIQQSSMKSPLYLVSR	sp|Q8WYP5|ELYS_HUMAN	Q8WYP5	AHCTF1	Protein ELYS OS=Homo sapiens OX=9606 GN=AHCTF1 PE=1 SV=3	42.27	0.000319455	95.2872	[15] Phospho (ST)	1	QQSSMKS*PLYLVS	1142	sp|Q8WYP5|ELYS_HUMAN	209101	216413	206538	161119	117917	1774.97	209101	117917	0.024322	0.880387	-0.826427	0	0	0.184498	0.376934	0.184498	0.376934
SLPSSSQLKGSPQAISR	sp|Q8WYP5|ELYS_HUMAN	Q8WYP5	AHCTF1	Protein ELYS OS=Homo sapiens OX=9606 GN=AHCTF1 PE=1 SV=3	95.15	0	65.2955	[11] Phospho (ST)	1	SSQLKGS*PQAISR	1160	sp|Q8WYP5|ELYS_HUMAN	3.30113e+06	2.94353e+06	2.727e+06	2.6117e+06	1.77699e+06	6.16171e+06	2.94353e+06	2.6117e+06	0.0969514	0.662043	-0.17256	0	0	0.945254	0.971027	0.945254	0.971027
SPLYLVSR	sp|Q8WYP5|ELYS_HUMAN	Q8WYP5	AHCTF1	Protein ELYS OS=Homo sapiens OX=9606 GN=AHCTF1 PE=1 SV=3	25.64	0.00121724	83.4497	[1] Phospho (ST)	1	QQSSMKS*PLYLVS	1142	sp|Q8WYP5|ELYS_HUMAN	18383.9	13942.9	12512.4	8380.89	6395.13	432.895	13942.9	6395.13	0.204845	0.815929	-1.12449	0	0	0.0958144	0.256936	0.0958144	0.256936
STPLASPSPSPGR	sp|Q8WYP5|ELYS_HUMAN	Q8WYP5	AHCTF1	Protein ELYS OS=Homo sapiens OX=9606 GN=AHCTF1 PE=1 SV=3	14.3	0.00173601	52.4273	[6] Phospho (ST)	1	RSTPLAS*PSPSPG	1214	sp|Q8WYP5|ELYS_HUMAN	67221	186179	167674	22094.7	7412.58	104211	167674	22094.7	0.456054	1.17039	-2.92388	0	0	0.0712141	0.217205	0.0712141	0.217205
TTSFFLNSPEKEHQEMDEGSQSLEK	sp|Q8WYP5|ELYS_HUMAN	Q8WYP5	AHCTF1	Protein ELYS OS=Homo sapiens OX=9606 GN=AHCTF1 PE=1 SV=3	28.54	0.000994188	81.7335	[8] Phospho (ST)|[16] Oxidation (M)	2	TSFFLNS*PEKEHQ,EKEHQEM*DEGSQS	12831291	sp|Q8WYP5|ELYS_HUMAN	596261	730848	619667	647438	328049	2.69295e+06	619667	647438	0.110807	1.04935	0.0632481	0	0	0.667093	0.796553	0.667093	0.796553
ASTVSPGGYMVPK	sp|Q5TGY3|AHDC1_HUMAN	Q5TGY3	AHDC1	AT-hook DNA-binding motif-containing protein 1 OS=Homo sapiens OX=9606 GN=AHDC1 PE=1 SV=1	34.45	0.000525394	66.0153	[5] Phospho (ST)|[10] Oxidation (M)	2	SRASTVS*PGGYMV,VSPGGYM*VPKGTT	10641069	sp|Q5TGY3|AHDC1_HUMAN	72090.1	28158.5	39189.1	35902.5	28536.6	92920.8	39189.1	35902.5	0.491728	0.671814	-0.126369	0	0	0.89088	0.939559	0.89088	0.939559
LASPQPSYAADANDSK	sp|Q5TGY3|AHDC1_HUMAN	Q5TGY3	AHDC1	AT-hook DNA-binding motif-containing protein 1 OS=Homo sapiens OX=9606 GN=AHDC1 PE=1 SV=1	33.9	0.000519166	50.9624	[3] Phospho (ST)	1	RKQKLAS*PQPSYA	596	sp|Q5TGY3|AHDC1_HUMAN	8604.25	29508	43734.2	105845	136892	46928.7	29508	105845	0.647692	0.473256	1.84278	0	0	0.0417228	0.16153	0.0417228	0.16153
PLLPTRPPASPPDK	sp|Q5TGY3|AHDC1_HUMAN	Q5TGY3	AHDC1	AT-hook DNA-binding motif-containing protein 1 OS=Homo sapiens OX=9606 GN=AHDC1 PE=1 SV=1	43.96	0.00022237	81.0564	[10] Phospho (ST)	1	PTRPPAS*PPDKAF	46	sp|Q5TGY3|AHDC1_HUMAN	69714.6	74367.5	55975.3	114675	128612	138672	69714.6	128612	0.143402	0.0946488	0.883496	0	0	0.0138112	0.088089	0.0138112	0.088089
TEAACLSAPHLASPPATPK	sp|Q5TGY3|AHDC1_HUMAN	Q5TGY3	AHDC1	AT-hook DNA-binding motif-containing protein 1 OS=Homo sapiens OX=9606 GN=AHDC1 PE=1 SV=1	24.96	0.00127146	83.8397	[13] Phospho (ST)	1	SAPHLAS*PPATPK	1507	sp|Q5TGY3|AHDC1_HUMAN	297388	211439	219815	223834	244823	79988.9	219815	223834	0.195119	0.49061	0.0261421	0	0	0.3264	0.520678	0.3264	0.520678
ADIDVSGPK	sp|Q09666|AHNK_HUMAN	Q09666	AHNAK	Neuroblast differentiation-associated protein AHNAK OS=Homo sapiens OX=9606 GN=AHNAK PE=1 SV=2	43.59	0.000220459	52.3571	[6] Phospho (ST)	1	KADIDVS*GPKVDV	1286	sp|Q09666|AHNK_HUMAN	101736	81856.9	100661	48203.8	56043.4	53845.2	100661	53845.2	0.11799	0.0767371	-0.902613	0	0	0.0183913	0.102914	0.0183913	0.102914
ADIDVSGPKVDVDVPDVNIEGPDAK	sp|Q09666|AHNK_HUMAN	Q09666	AHNAK	Neuroblast differentiation-associated protein AHNAK OS=Homo sapiens OX=9606 GN=AHNAK PE=1 SV=2	23.08	0.00135713	95.7281	[6] Phospho (ST)	1	KADIDVS*GPKVDV	4684	sp|Q09666|AHNK_HUMAN	89776.9	39814.2	15915.2	29890.8	57947.6	303410	39814.2	57947.6	0.777069	1.15379	0.541466	0	0	0.356422	0.547856	0.356422	0.547856
ADIKSPSLDVTVPEAELNLETPEISVGGK	sp|Q09666|AHNK_HUMAN	Q09666	AHNAK	Neuroblast differentiation-associated protein AHNAK OS=Homo sapiens OX=9606 GN=AHNAK PE=1 SV=2	11.53	0.00182876	97.9272	[5] Phospho (ST)	1	PKADIKS*PSLDVT	4993	sp|Q09666|AHNK_HUMAN	44874.9	40302.1	47068.4	17589.3	28991.5	6574.45	44874.9	17589.3	0.0783128	0.632623	-1.35121	0	0	0.0398571	0.157207	0.0398571	0.157207
AEAPLPSPK	sp|Q09666|AHNK_HUMAN	Q09666	AHNAK	Neuroblast differentiation-associated protein AHNAK OS=Homo sapiens OX=9606 GN=AHNAK PE=1 SV=2	36.29	0.000459221	56.0876	[7] Phospho (ST)	1	AEAPLPS*PKLEGE	5110	sp|Q09666|AHNK_HUMAN	3.022e+06	4.16703e+06	3.63925e+06	1.18219e+06	2.29863e+06	1.995e+06	3.63925e+06	1.995e+06	0.158779	0.316253	-0.867251	0	0	0.031094	0.13704	0.031094	0.13704
AGLRVSAPEVSVGHK	sp|Q09666|AHNK_HUMAN	Q09666	AHNAK	Neuroblast differentiation-associated protein AHNAK OS=Homo sapiens OX=9606 GN=AHNAK PE=1 SV=2	32.26	0.000749625	73.3781	[6] Phospho (ST)	1	KAGLRVS*APEVSV	332	sp|Q09666|AHNK_HUMAN	194201	216781	186044	85495.5	116594	110272	194201	110272	0.0800094	0.15786	-0.816486	0	0	0.0139346	0.0885452	0.0139346	0.0885452
ASLGSLEGEAEAEASSPK	sp|Q09666|AHNK_HUMAN	Q09666	AHNAK	Neuroblast differentiation-associated protein AHNAK OS=Homo sapiens OX=9606 GN=AHNAK PE=1 SV=2	211.57	0	83.1219	[16] Phospho (ST)	1	AEAEASS*PKGKFS	5763	sp|Q09666|AHNK_HUMAN	1.31152e+07	1.18003e+07	1.24916e+07	1.7141e+07	2.33758e+07	1.76846e+07	1.24916e+07	1.76846e+07	0.0527486	0.178009	0.501534	0	0	0.0604674	0.198771	0.0604674	0.198771
ASLGSLEGEAEAEASSPK	sp|Q09666|AHNK_HUMAN	Q09666	AHNAK	Neuroblast differentiation-associated protein AHNAK OS=Homo sapiens OX=9606 GN=AHNAK PE=1 SV=2	117.69	0	89.6437	[2] Phospho (ST)	1	LKSSKAS*LGSLEG	5749	sp|Q09666|AHNK_HUMAN	236075	222221	220604	815873	1.27856e+06	1.5235e+06	222221	1.27856e+06	0.0375794	0.297977	2.52445	0	0	0.000483604	0.0203015	0.000483604	0.0203015
ASLGSLEGEAEAEASSPK	sp|Q09666|AHNK_HUMAN	Q09666	AHNAK	Neuroblast differentiation-associated protein AHNAK OS=Homo sapiens OX=9606 GN=AHNAK PE=1 SV=2	147.53	0	93.4849	[2] Phospho (ST)|[5] Phospho (ST)	2	LKSSKAS*LGSLEG,SKASLGS*LEGEAE	57495752	sp|Q09666|AHNK_HUMAN	1.16109e+06	949761	738610	1.49174e+06	4.51076e+06	3.17076e+06	949761	3.17076e+06	0.2224	0.494702	1.73919	0	0.166667	0.0201465	0.108007	0.0201465	0.108007
ASLGSLEGEAEAEASSPK	sp|Q09666|AHNK_HUMAN	Q09666	AHNAK	Neuroblast differentiation-associated protein AHNAK OS=Homo sapiens OX=9606 GN=AHNAK PE=1 SV=2	287.2	0	91.5846	[5] Phospho (ST)	1	SKASLGS*LEGEAE	5752	sp|Q09666|AHNK_HUMAN	1.20503e+07	1.03257e+07	1.06113e+07	1.79289e+07	2.64139e+07	3.07996e+07	1.06113e+07	2.64139e+07	0.0840612	0.261234	1.3157	0	0	0.0113009	0.0799153	0.0113009	0.0799153
ASLGSLEGEAEAEASSPK	sp|Q09666|AHNK_HUMAN	Q09666	AHNAK	Neuroblast differentiation-associated protein AHNAK OS=Homo sapiens OX=9606 GN=AHNAK PE=1 SV=2	117.8	0	90.3257	[5] Phospho (ST)|[16] Phospho (ST)	2	SKASLGS*LEGEAE,AEAEASS*PKGKFS	57525763	sp|Q09666|AHNK_HUMAN	1.96334e+06	1.55845e+06	1.52235e+06	3.00521e+06	4.8224e+06	6.46857e+06	1.55845e+06	4.8224e+06	0.145625	0.363535	1.62964	0	0	0.00942701	0.0727648	0.00942701	0.0727648
ASLGSLEGEAEAEASSPKGK	sp|Q09666|AHNK_HUMAN	Q09666	AHNAK	Neuroblast differentiation-associated protein AHNAK OS=Homo sapiens OX=9606 GN=AHNAK PE=1 SV=2	131.23	0	78.0249	[16] Phospho (ST)	1	AEAEASS*PKGKFS	5763	sp|Q09666|AHNK_HUMAN	2.34408e+06	2.32274e+06	2.41558e+06	3.04838e+06	4.82574e+06	2.77087e+06	2.34408e+06	3.04838e+06	0.0205978	0.314215	0.379025	0	0	0.13795	0.316688	0.13795	0.316688
ASLGSLEGEAEAEASSPKGK	sp|Q09666|AHNK_HUMAN	Q09666	AHNAK	Neuroblast differentiation-associated protein AHNAK OS=Homo sapiens OX=9606 GN=AHNAK PE=1 SV=2	50.28	0.000129853	87.3255	[5] Phospho (ST)|[16] Phospho (ST)	2	SKASLGS*LEGEAE,AEAEASS*PKGKFS	57525763	sp|Q09666|AHNK_HUMAN	224932	477853	332306	369759	437373	581.938	332306	369759	0.36791	0.873228	0.154076	0	0	0.330548	0.524577	0.330548	0.524577
DDGVFVQEVTQNSPAAR	sp|Q09666|AHNK_HUMAN	Q09666	AHNAK	Neuroblast differentiation-associated protein AHNAK OS=Homo sapiens OX=9606 GN=AHNAK PE=1 SV=2	127.56	0	83.7909	[13] Phospho (ST)	1	QEVTQNS*PAARTG	41	sp|Q09666|AHNK_HUMAN	1.24073e+06	1.03141e+06	966479	1.36761e+06	1.38197e+06	1.01612e+06	1.03141e+06	1.36761e+06	0.13276	0.16507	0.407034	0	0	0.480733	0.651763	0.480733	0.651763
DIDISSPEFK	sp|Q09666|AHNK_HUMAN	Q09666	AHNAK	Neuroblast differentiation-associated protein AHNAK OS=Homo sapiens OX=9606 GN=AHNAK PE=1 SV=2	26.61	0.00117045	85.7306	[6] Phospho (ST)	1	KDIDISS*PEFKIK	177	sp|Q09666|AHNK_HUMAN	5.80913e+06	5.38846e+06	6.93033e+06	6.21024e+06	7.43194e+06	914655	5.80913e+06	6.21024e+06	0.131899	0.713966	0.0963276	0	0	0.395293	0.582718	0.395293	0.582718
EFSGPSTPTGTLEFEGGEVSLEGGK	sp|Q09666|AHNK_HUMAN	Q09666	AHNAK	Neuroblast differentiation-associated protein AHNAK OS=Homo sapiens OX=9606 GN=AHNAK PE=1 SV=2	116.68	0	96.1219	[7] Phospho (ST)	1	EFSGPST*PTGTLE	5794	sp|Q09666|AHNK_HUMAN	2.0613e+06	1.79876e+06	2.54459e+06	1.08221e+06	1.26325e+06	1.60823e+06	2.0613e+06	1.26325e+06	0.177209	0.202774	-0.706409	0	0	0.0612751	0.199896	0.0612751	0.199896
EVFSSCSSEVVLSGDDEEYQR	sp|Q09666|AHNK_HUMAN	Q09666	AHNAK	Neuroblast differentiation-associated protein AHNAK OS=Homo sapiens OX=9606 GN=AHNAK PE=1 SV=2	309.48	0	85.5425	[13] Phospho (ST)	1	SSEVVLS*GDDEEY	115	sp|Q09666|AHNK_HUMAN	6.27482e+06	7.32893e+06	7.72662e+06	3.83753e+06	6.09148e+06	1.12415e+06	7.32893e+06	3.83753e+06	0.105515	0.675065	-0.933426	0.111111	0.111111	0.111037	0.278778	0.111037	0.278778
FAGGLHFSGPK	sp|Q09666|AHNK_HUMAN	Q09666	AHNAK	Neuroblast differentiation-associated protein AHNAK OS=Homo sapiens OX=9606 GN=AHNAK PE=1 SV=2	110.71	0	82.8816	[8] Phospho (ST)	1	AGGLHFS*GPKVEG	5620	sp|Q09666|AHNK_HUMAN	52045.6	48035.3	37482.6	57356	57440	108546	48035.3	57440	0.16405	0.39666	0.257961	0.333333	0.333333	0.135641	0.313354	0.135641	0.313354
FAGGLHFSGPKVEGGVK	sp|Q09666|AHNK_HUMAN	Q09666	AHNAK	Neuroblast differentiation-associated protein AHNAK OS=Homo sapiens OX=9606 GN=AHNAK PE=1 SV=2	55.02	0.00014556	86.8556	[8] Phospho (ST)	1	AGGLHFS*GPKVEG	5620	sp|Q09666|AHNK_HUMAN	5476.94	12221.9	10216.1	22463.3	66734.9	112514	10216.1	66734.9	0.372226	0.669677	2.7076	0.333333	0	0.00985395	0.0739568	0.00985395	0.0739568
FGFGAKSPK	sp|Q09666|AHNK_HUMAN	Q09666	AHNAK	Neuroblast differentiation-associated protein AHNAK OS=Homo sapiens OX=9606 GN=AHNAK PE=1 SV=2	34.93	0.000532812	54.6894	[7] Phospho (ST)	1	FGFGAKS*PKADIK	4986	sp|Q09666|AHNK_HUMAN	473799	587090	458174	220079	259100	720314	473799	259100	0.138943	0.695873	-0.870766	0	0.333333	0.336698	0.530751	0.336698	0.530751
FGTFGGLGSK	sp|Q09666|AHNK_HUMAN	Q09666	AHNAK	Neuroblast differentiation-associated protein AHNAK OS=Homo sapiens OX=9606 GN=AHNAK PE=1 SV=2	26.65	0.0011713	85.612	[9] Phospho (ST)	1	TFGGLGS*KSKGHY	5830	sp|Q09666|AHNK_HUMAN	37944.9	55309.6	61706.6	222680	153869	245956	55309.6	222680	0.238036	0.23076	2.00937	0	0	0.00139625	0.0337699	0.00139625	0.0337699
FKAEAPLPSPK	sp|Q09666|AHNK_HUMAN	Q09666	AHNAK	Neuroblast differentiation-associated protein AHNAK OS=Homo sapiens OX=9606 GN=AHNAK PE=1 SV=2	82.2	0.000287191	71.695	[9] Phospho (ST)	1	AEAPLPS*PKLEGE	5110	sp|Q09666|AHNK_HUMAN	2.24345e+07	2.04093e+07	1.91704e+07	7.94452e+06	1.19332e+07	1.59595e+07	2.04093e+07	1.19332e+07	0.0797122	0.335475	-0.774249	0	0	0.0526429	0.184475	0.0526429	0.184475
FKMPDVHFKSPQISMSDIDLNLK	sp|Q09666|AHNK_HUMAN	Q09666	AHNAK	Neuroblast differentiation-associated protein AHNAK OS=Homo sapiens OX=9606 GN=AHNAK PE=1 SV=2	19.55	0.00152536	95.0678	[3] Oxidation (M)|[10] Phospho (ST)	2	KGPKFKM*PDVHFK,PDVHFKS*PQISMS	45094516	sp|Q09666|AHNK_HUMAN	64.3053	4323.4	64.3053	6672.24	19293.9	64.3053	64.3053	6672.24	1.657	1.12602	6.69709	0.666667	0.333333	0.326489	0.520776	0.326489	0.520776
FKMPFLSISSPK	sp|Q09666|AHNK_HUMAN	Q09666	AHNAK	Neuroblast differentiation-associated protein AHNAK OS=Homo sapiens OX=9606 GN=AHNAK PE=1 SV=2	48.96	0.000125897	99.21	[10] Phospho (ST)	1	PFLSISS*PKVSMP	3412	sp|Q09666|AHNK_HUMAN	162.191	14570.6	10566.6	20478.3	8157.9	17294.2	10566.6	17294.2	0.88192	0.41772	0.710775	0	0	0.257996	0.460875	0.257996	0.460875
FNFSGSK	sp|Q09666|AHNK_HUMAN	Q09666	AHNAK	Neuroblast differentiation-associated protein AHNAK OS=Homo sapiens OX=9606 GN=AHNAK PE=1 SV=2	26.83	0.00110229	54.4382	[4] Phospho (ST)	1	LPKFNFS*GSKVQT	3360	sp|Q09666|AHNK_HUMAN	6024.75	5236.3	2640.68	8528.2	4680.51	425091	5236.3	8528.2	0.382103	1.65381	0.703693	0	0.333333	0.201451	0.397553	0.201451	0.397553
GDLKSSKASLGSLEGEAEAEASSPK	sp|Q09666|AHNK_HUMAN	Q09666	AHNAK	Neuroblast differentiation-associated protein AHNAK OS=Homo sapiens OX=9606 GN=AHNAK PE=1 SV=2	103.84	0	87.2773	[6] Phospho (ST)|[9] Phospho (ST)	2	KGDLKSS*KASLGS,LKSSKAS*LGSLEG	57465749	sp|Q09666|AHNK_HUMAN	156742	245263	190244	457480	489350	181198	190244	457480	0.226394	0.450687	1.26585	0	0	0.142123	0.322382	0.142123	0.322382
GDLKSSKASLGSLEGEAEAEASSPK	sp|Q09666|AHNK_HUMAN	Q09666	AHNAK	Neuroblast differentiation-associated protein AHNAK OS=Homo sapiens OX=9606 GN=AHNAK PE=1 SV=2	191.69	0	88.2	[6] Phospho (ST)|[9] Phospho (ST)|[12] Phospho (ST)	3	KGDLKSS*KASLGS,LKSSKAS*LGSLEG,SKASLGS*LEGEAE	574657495752	sp|Q09666|AHNK_HUMAN	1.06519e+06	1.26742e+06	979127	2.3695e+06	4.42313e+06	1.07744e+06	1.06519e+06	2.3695e+06	0.134065	0.643158	1.15347	0	0	0.117721	0.288806	0.117721	0.288806
GDRSPEPGQTWTR	sp|Q09666|AHNK_HUMAN	Q09666	AHNAK	Neuroblast differentiation-associated protein AHNAK OS=Homo sapiens OX=9606 GN=AHNAK PE=1 SV=2	136.39	0	46.1647	[4] Phospho (ST)	1	HRKGDRS*PEPGQT	93	sp|Q09666|AHNK_HUMAN	7.46006e+06	6.55177e+06	6.22237e+06	7.00106e+06	1.17631e+07	7.84828e+06	6.55177e+06	7.84828e+06	0.0950388	0.286372	0.260491	0.166667	0.0833333	0.289964	0.489528	0.289964	0.489528
GGADVSGGVSAPDISLGEGHLSVK	sp|Q09666|AHNK_HUMAN	Q09666	AHNAK	Neuroblast differentiation-associated protein AHNAK OS=Homo sapiens OX=9606 GN=AHNAK PE=1 SV=2	53.28	0.000139567	92.6226	[10] Phospho (ST)	1	DVSGGVS*APDISL	5577	sp|Q09666|AHNK_HUMAN	63040.5	108143	79464.2	283647	169994	272692	79464.2	272692	0.273218	0.258952	1.7789	0	0	0.00643422	0.0617523	0.00643422	0.0617523
GGVTGSPEASISGSK	sp|Q09666|AHNK_HUMAN	Q09666	AHNAK	Neuroblast differentiation-associated protein AHNAK OS=Homo sapiens OX=9606 GN=AHNAK PE=1 SV=2	93.4	0	50.7845	[6] Phospho (ST)	1	KGGVTGS*PEASIS	5731	sp|Q09666|AHNK_HUMAN	1.15816e+07	1.20692e+07	1.11938e+07	2.05993e+07	1.61102e+07	1.83234e+07	1.15816e+07	1.83234e+07	0.0377638	0.122362	0.661849	0	0	0.0436428	0.165972	0.0436428	0.165972
GGVTGSPEASISGSKGDLK	sp|Q09666|AHNK_HUMAN	Q09666	AHNAK	Neuroblast differentiation-associated protein AHNAK OS=Homo sapiens OX=9606 GN=AHNAK PE=1 SV=2	79.04	0.000265252	59.9027	[14] Phospho (ST)	1	EASISGS*KGDLKS	5739	sp|Q09666|AHNK_HUMAN	1.20595e+06	967764	1.0265e+06	3.39184e+06	3.54514e+06	4.27899e+06	1.0265e+06	3.54514e+06	0.116324	0.126832	1.78811	0	0	0.000623119	0.0231364	0.000623119	0.0231364
GGVTGSPEASISGSKGDLK	sp|Q09666|AHNK_HUMAN	Q09666	AHNAK	Neuroblast differentiation-associated protein AHNAK OS=Homo sapiens OX=9606 GN=AHNAK PE=1 SV=2	77.85	0.000257732	63.6255	[6] Phospho (ST)|[14] Phospho (ST)	2	KGGVTGS*PEASIS,EASISGS*KGDLKS	57315739	sp|Q09666|AHNK_HUMAN	280979	455369	499924	900979	577913	1.43328e+06	455369	900979	0.28079	0.444953	0.984457	0	0.166667	0.0427075	0.163657	0.0427075	0.163657
GHYEVTGSDDETGK	sp|Q09666|AHNK_HUMAN	Q09666	AHNAK	Neuroblast differentiation-associated protein AHNAK OS=Homo sapiens OX=9606 GN=AHNAK PE=1 SV=2	113.85	0	30.3764	[8] Phospho (ST)	1	HYEVTGS*DDETGK	5841	sp|Q09666|AHNK_HUMAN	2.4035e+07	2.1217e+07	2.19818e+07	4.83752e+07	4.11605e+07	5.44531e+07	2.19818e+07	4.83752e+07	0.0650224	0.138643	1.13796	0	0	0.00649575	0.0619287	0.00649575	0.0619287
GHYEVTGSDDETGKLQGSGVSLASK	sp|Q09666|AHNK_HUMAN	Q09666	AHNAK	Neuroblast differentiation-associated protein AHNAK OS=Homo sapiens OX=9606 GN=AHNAK PE=1 SV=2	23.29	0.00129445	72.1213	[12] Phospho (ST)|[18] Phospho (ST)	2	TGSDDET*GKLQGS,TGKLQGS*GVSLAS	58455851	sp|Q09666|AHNK_HUMAN	93697.1	77141.8	84445	172402	232570	194579	84445	194579	0.0975004	0.152257	1.20428	0	0	0.00440771	0.0534479	0.00440771	0.0534479
GHYEVTGSDDETGKLQGSGVSLASK	sp|Q09666|AHNK_HUMAN	Q09666	AHNAK	Neuroblast differentiation-associated protein AHNAK OS=Homo sapiens OX=9606 GN=AHNAK PE=1 SV=2	371.95	0	71.6142	[8] Phospho (ST)	1	HYEVTGS*DDETGK	5841	sp|Q09666|AHNK_HUMAN	4.67267e+07	3.78015e+07	4.26965e+07	4.00055e+07	7.89562e+07	7.53813e+07	4.26965e+07	7.53813e+07	0.105394	0.332359	0.820091	0	0	0.182652	0.374548	0.182652	0.374548
GKGGVTGSPEASISGSK	sp|Q09666|AHNK_HUMAN	Q09666	AHNAK	Neuroblast differentiation-associated protein AHNAK OS=Homo sapiens OX=9606 GN=AHNAK PE=1 SV=2	152.14	0	42.4108	[8] Phospho (ST)	1	KGGVTGS*PEASIS	5731	sp|Q09666|AHNK_HUMAN	8.80969e+06	6.6341e+06	6.76728e+06	9.90009e+06	1.20325e+07	2.71886e+07	6.76728e+06	1.20325e+07	0.164709	0.575707	0.830283	0	0	0.0725647	0.219656	0.0725647	0.219656
GKGGVTGSPEASISGSKGDLK	sp|Q09666|AHNK_HUMAN	Q09666	AHNAK	Neuroblast differentiation-associated protein AHNAK OS=Homo sapiens OX=9606 GN=AHNAK PE=1 SV=2	69.62	0.000207727	51.1302	[16] Phospho (ST)	1	EASISGS*KGDLKS	5739	sp|Q09666|AHNK_HUMAN	71553.5	94775.4	95074.7	334443	410085	158273	94775.4	334443	0.154869	0.429354	1.81917	0	0	0.00964255	0.0734767	0.00964255	0.0734767
GKGGVTGSPEASISGSKGDLK	sp|Q09666|AHNK_HUMAN	Q09666	AHNAK	Neuroblast differentiation-associated protein AHNAK OS=Homo sapiens OX=9606 GN=AHNAK PE=1 SV=2	21.32	0.00137741	52.9145	[8] Phospho (ST)	1	KGGVTGS*PEASIS	5731	sp|Q09666|AHNK_HUMAN	9646.58	69386.7	6649.75	64.3053	4194.43	64.3053	9646.58	64.3053	1.23903	1.65476	-7.22894	0	0.666667	0.0230091	0.115678	0.0230091	0.115678
GKGGVTGSPEASISGSKGDLK	sp|Q09666|AHNK_HUMAN	Q09666	AHNAK	Neuroblast differentiation-associated protein AHNAK OS=Homo sapiens OX=9606 GN=AHNAK PE=1 SV=2	24.58	0.00133184	54.4382	[8] Phospho (ST)|[12] Phospho (ST)|[16] Phospho (ST)	3	KGGVTGS*PEASIS,TGSPEAS*ISGSKG,EASISGS*KGDLKS	573157355739	sp|Q09666|AHNK_HUMAN	8988.4	13037.8	5003.43	2182.79	3845.83	31705	8988.4	3845.83	0.445869	1.31862	-1.22477	0.333333	0	0.736782	0.844342	0.736782	0.844342
GKGGVTGSPEASISGSKGDLK	sp|Q09666|AHNK_HUMAN	Q09666	AHNAK	Neuroblast differentiation-associated protein AHNAK OS=Homo sapiens OX=9606 GN=AHNAK PE=1 SV=2	80.71	0.000277316	55.9523	[8] Phospho (ST)|[16] Phospho (ST)	2	KGGVTGS*PEASIS,EASISGS*KGDLKS	57315739	sp|Q09666|AHNK_HUMAN	404423	425630	374342	522485	655029	598274	404423	598274	0.0641935	0.112344	0.564942	0	0	0.0728453	0.220109	0.0728453	0.220109
GKGGVTGSPEASISGSKGDLKSSK	sp|Q09666|AHNK_HUMAN	Q09666	AHNAK	Neuroblast differentiation-associated protein AHNAK OS=Homo sapiens OX=9606 GN=AHNAK PE=1 SV=2	34.11	0.000521694	43.7249	[8] Phospho (ST)	1	KGGVTGS*PEASIS	5731	sp|Q09666|AHNK_HUMAN	64.3053	64.3053	64.3053	64.3053	64.3053	157.821	64.3053	64.3053	0	0.565487	0	1	0.666667	0.360699	0.551941	0.360699	0.551941
GPAFNMASPESDFGINLK	sp|Q09666|AHNK_HUMAN	Q09666	AHNAK	Neuroblast differentiation-associated protein AHNAK OS=Homo sapiens OX=9606 GN=AHNAK PE=1 SV=2	97.21	0	99.0654	[8] Phospho (ST)	1	PAFNMAS*PESDFG	5552	sp|Q09666|AHNK_HUMAN	260814	234941	267294	294949	140793	52630.4	260814	140793	0.0673019	0.753409	-0.88945	0	0	0.192604	0.386781	0.192604	0.386781
GPQVALKGSR	sp|Q09666|AHNK_HUMAN	Q09666	AHNAK	Neuroblast differentiation-associated protein AHNAK OS=Homo sapiens OX=9606 GN=AHNAK PE=1 SV=2	28.48	0.00106935	36.3528	[9] Phospho (ST)	1	QVALKGS*RVDIET	539	sp|Q09666|AHNK_HUMAN	1485.9	2495.05	2280.17	7355.06	64.3053	64.3053	2280.17	64.3053	0.254702	1.6874	-5.14806	0	0.666667	0.217911	0.416437	0.217911	0.416437
GPQVSGELKGPGVDVNLK	sp|Q09666|AHNK_HUMAN	Q09666	AHNAK	Neuroblast differentiation-associated protein AHNAK OS=Homo sapiens OX=9606 GN=AHNAK PE=1 SV=2	15.1	0.00176263	87.0868	[5] Phospho (ST)	1	AKGPQVS*GELKGP	5430	sp|Q09666|AHNK_HUMAN	3837.85	5114.91	3873.1	5777.19	177.84	19695.1	3873.1	5777.19	0.170129	1.1754	0.576882	0	0	0.727697	0.838271	0.727697	0.838271
GPSLDIDTPDVNIEGPEGK	sp|Q09666|AHNK_HUMAN	Q09666	AHNAK	Neuroblast differentiation-associated protein AHNAK OS=Homo sapiens OX=9606 GN=AHNAK PE=1 SV=2	158.39	0	93.3807	[8] Phospho (ST)	1	PSLDIDT*PDVNIE	4430	sp|Q09666|AHNK_HUMAN	491703	487650	470243	655964	676374	1.54333e+06	487650	676374	0.023596	0.528433	0.471975	0	0.166667	0.0848082	0.239561	0.0848082	0.239561
HRSNSFSDER	sp|Q09666|AHNK_HUMAN	Q09666	AHNAK	Neuroblast differentiation-associated protein AHNAK OS=Homo sapiens OX=9606 GN=AHNAK PE=1 SV=2	81.53	0.000282805	19.0209	[3] Phospho (ST)	1	KKPRHRS*NSFSDE	5780	sp|Q09666|AHNK_HUMAN	4.68085e+06	4.5223e+06	3.69858e+06	444103	4.98554e+06	1.61992e+07	4.5223e+06	4.98554e+06	0.12262	1.12483	0.140693	0	0	0.78552	0.875428	0.78552	0.875428
HRSNSFSDER	sp|Q09666|AHNK_HUMAN	Q09666	AHNAK	Neuroblast differentiation-associated protein AHNAK OS=Homo sapiens OX=9606 GN=AHNAK PE=1 SV=2	63.5	0.000180278	20.1442	[3] Phospho (ST)|[5] Phospho (ST)	2	KKPRHRS*NSFSDE,PRHRSNS*FSDERE	57805782	sp|Q09666|AHNK_HUMAN	5.98959e+06	1.18718e+07	7.60367e+06	146231	5.00192e+06	2.17187e+07	7.60367e+06	5.00192e+06	0.358052	1.26364	-0.604213	0	0	0.394736	0.582315	0.394736	0.582315
HRSNSFSDER	sp|Q09666|AHNK_HUMAN	Q09666	AHNAK	Neuroblast differentiation-associated protein AHNAK OS=Homo sapiens OX=9606 GN=AHNAK PE=1 SV=2	24.25	0.00132018	18.4964	[5] Phospho (ST)	1	PRHRSNS*FSDERE	5782	sp|Q09666|AHNK_HUMAN	14497.6	27917.3	16443.2	13031.3	20809.3	20978	16443.2	20809.3	0.369623	0.248462	0.339734	0	0.333333	0.853275	0.917181	0.853275	0.917181
HRSNSFSDEREFSGPSTPTGTLEFEGGEVSLEGGK	sp|Q09666|AHNK_HUMAN	Q09666	AHNAK	Neuroblast differentiation-associated protein AHNAK OS=Homo sapiens OX=9606 GN=AHNAK PE=1 SV=2	48.79	0.000125376	93.9685	[16] Phospho (ST)|[17] Phospho (ST)	2	REFSGPS*TPTGTL,EFSGPST*PTGTLE	57935794	sp|Q09666|AHNK_HUMAN	1.65084e+06	2.46779e+06	2.64299e+06	157315	2.095e+06	6.9934e+06	2.46779e+06	2.095e+06	0.234945	1.14321	-0.236267	0	0	0.615862	0.759499	0.615862	0.759499
HRSNSFSDEREFSGPSTPTGTLEFEGGEVSLEGGK	sp|Q09666|AHNK_HUMAN	Q09666	AHNAK	Neuroblast differentiation-associated protein AHNAK OS=Homo sapiens OX=9606 GN=AHNAK PE=1 SV=2	32.84	0.000760135	95.1446	[3] Phospho (ST)|[5] Phospho (ST)|[7] Phospho (ST)	3	KKPRHRS*NSFSDE,PRHRSNS*FSDERE,HRSNSFS*DEREFS	578057825784	sp|Q09666|AHNK_HUMAN	29475.4	16176	23310.3	47921.8	37719.8	73169.1	23310.3	47921.8	0.289534	0.344731	1.03971	0.333333	0	0.0256961	0.123217	0.0256961	0.123217
HRSNSFSDEREFSGPSTPTGTLEFEGGEVSLEGGK	sp|Q09666|AHNK_HUMAN	Q09666	AHNAK	Neuroblast differentiation-associated protein AHNAK OS=Homo sapiens OX=9606 GN=AHNAK PE=1 SV=2	14.85	0.00175521	92.0533	[5] Phospho (ST)	1	PRHRSNS*FSDERE	5782	sp|Q09666|AHNK_HUMAN	34235.3	194120	42947.8	25292.3	23519.1	29071.9	42947.8	25292.3	0.994091	0.109246	-0.763884	0	0	0.109105	0.275975	0.109105	0.275975
HRSNSFSDEREFSGPSTPTGTLEFEGGEVSLEGGK	sp|Q09666|AHNK_HUMAN	Q09666	AHNAK	Neuroblast differentiation-associated protein AHNAK OS=Homo sapiens OX=9606 GN=AHNAK PE=1 SV=2	65.18	0.000188253	94.6028	[7] Phospho (ST)|[13] Phospho (ST)|[16] Phospho (ST)	3	HRSNSFS*DEREFS,SDEREFS*GPSTPT,REFSGPS*TPTGTL	578457905793	sp|Q09666|AHNK_HUMAN	91234.1	152530	100900	63697.8	125495	126198	100900	125495	0.286846	0.341322	0.314703	0	0	0.712726	0.828077	0.712726	0.828077
IHMSGPK	sp|Q09666|AHNK_HUMAN	Q09666	AHNAK	Neuroblast differentiation-associated protein AHNAK OS=Homo sapiens OX=9606 GN=AHNAK PE=1 SV=2	39.81	0.000501002	14.9012	[3] Oxidation (M)|[4] Phospho (ST)	2	KMPKIHM*SGPKIK,MPKIHMS*GPKIKA	50305031	sp|Q09666|AHNK_HUMAN	58698	88131.4	38492.2	86639.9	66538.9	323745	58698	86639.9	0.404089	0.899821	0.561721	0	0	0.180863	0.372564	0.180863	0.372564
IKGGADVSGGVSAPDISLGEGHLSVK	sp|Q09666|AHNK_HUMAN	Q09666	AHNAK	Neuroblast differentiation-associated protein AHNAK OS=Homo sapiens OX=9606 GN=AHNAK PE=1 SV=2	81.35	0.000281452	90.1116	[12] Phospho (ST)	1	DVSGGVS*APDISL	5577	sp|Q09666|AHNK_HUMAN	23644.3	113003	78345.8	298294	245905	596071	78345.8	298294	0.62866	0.496909	1.92881	0	0	0.0120244	0.082434	0.0120244	0.082434
ISAPNVDFNLEGPK	sp|Q09666|AHNK_HUMAN	Q09666	AHNAK	Neuroblast differentiation-associated protein AHNAK OS=Homo sapiens OX=9606 GN=AHNAK PE=1 SV=2	74.11	0.000233918	95.4858	[2] Phospho (ST)	1	LKGPRIS*APNVDF	5448	sp|Q09666|AHNK_HUMAN	1.39946e+06	1.82178e+06	1.59259e+06	1.76885e+06	1.25069e+06	270859	1.59259e+06	1.25069e+06	0.131753	0.693618	-0.348652	0	0	0.267106	0.470708	0.267106	0.470708
ISIPDVDLDLK	sp|Q09666|AHNK_HUMAN	Q09666	AHNAK	Neuroblast differentiation-associated protein AHNAK OS=Homo sapiens OX=9606 GN=AHNAK PE=1 SV=2	17.14	0.00152003	98.8175	[2] Phospho (ST)	1	IKAPKIS*IPDVDL	4850	sp|Q09666|AHNK_HUMAN	10258.4	15850.5	15602.8	1855.25	3840.8	5529.46	15602.8	3840.8	0.227242	0.491496	-2.02232	0	0	0.00734755	0.065709	0.00734755	0.065709
ISIPDVDLDLKGPK	sp|Q09666|AHNK_HUMAN	Q09666	AHNAK	Neuroblast differentiation-associated protein AHNAK OS=Homo sapiens OX=9606 GN=AHNAK PE=1 SV=2	12.52	0.00185654	96.6256	[2] Phospho (ST)	1	IKAPKIS*IPDVDL	4850	sp|Q09666|AHNK_HUMAN	2762.57	4501.33	6815.04	2616.16	64.3053	64.3053	4501.33	64.3053	0.433204	1.61031	-6.12927	0	0.666667	0.0348921	0.146991	0.0348921	0.146991
ISMPDFDLHLK	sp|Q09666|AHNK_HUMAN	Q09666	AHNAK	Neuroblast differentiation-associated protein AHNAK OS=Homo sapiens OX=9606 GN=AHNAK PE=1 SV=2	25.14	0.00127632	97.5936	[2] Phospho (ST)	1	IKAPKIS*MPDFDL	2580	sp|Q09666|AHNK_HUMAN	45600.7	60782.8	67207.4	226473	105375	39997.7	60782.8	105375	0.191747	0.76334	0.793799	0	0	0.288507	0.488977	0.288507	0.488977
ISMPDIDLNLK	sp|Q09666|AHNK_HUMAN	Q09666	AHNAK	Neuroblast differentiation-associated protein AHNAK OS=Homo sapiens OX=9606 GN=AHNAK PE=1 SV=2	15.28	0.00170819	93.6769	[2] Phospho (ST)|[3] Oxidation (M)	2	IKAPKIS*MPDIDL,KAPKISM*PDIDLN	27082709	sp|Q09666|AHNK_HUMAN	64.3053	64.3053	1723.88	7599.61	7045.69	3527.02	64.3053	7045.69	1.55168	0.364648	6.77566	0.666667	0	0.0139354	0.0885452	0.0139354	0.0885452
ISMPDIDLNLTGPK	sp|Q09666|AHNK_HUMAN	Q09666	AHNAK	Neuroblast differentiation-associated protein AHNAK OS=Homo sapiens OX=9606 GN=AHNAK PE=1 SV=2	53	0.000138696	99.2593	[11] Phospho (ST)	1	DIDLNLT*GPKIKG	2845	sp|Q09666|AHNK_HUMAN	117417	166297	134999	442038	864766	104350	134999	442038	0.17739	0.809975	1.71122	0	0	0.159458	0.345731	0.159458	0.345731
ISMPDLDLHLKSPK	sp|Q09666|AHNK_HUMAN	Q09666	AHNAK	Neuroblast differentiation-associated protein AHNAK OS=Homo sapiens OX=9606 GN=AHNAK PE=1 SV=2	101.51	0	94.1628	[12] Phospho (ST)	1	LDLHLKS*PKAKGE	2397	sp|Q09666|AHNK_HUMAN	5.43946e+06	6.34686e+06	6.22466e+06	3.37525e+06	2.82529e+06	1.88043e+06	6.22466e+06	2.82529e+06	0.0820189	0.28068	-1.1396	0	0	0.011182	0.0793482	0.011182	0.0793482
ISMPDLDLHLKSPK	sp|Q09666|AHNK_HUMAN	Q09666	AHNAK	Neuroblast differentiation-associated protein AHNAK OS=Homo sapiens OX=9606 GN=AHNAK PE=1 SV=2	150.5	0	83.8892	[3] Oxidation (M)|[12] Phospho (ST)	2	KAPKISM*PDLDLH,LDLHLKS*PKAKGE	23882397	sp|Q09666|AHNK_HUMAN	2.16454e+06	2.33921e+06	2.17109e+06	1.18406e+06	2.0642e+06	1.57086e+06	2.17109e+06	1.57086e+06	0.0444991	0.27462	-0.466864	0	0	0.154169	0.339208	0.154169	0.339208
ISMPDVDLHLK	sp|Q09666|AHNK_HUMAN	Q09666	AHNAK	Neuroblast differentiation-associated protein AHNAK OS=Homo sapiens OX=9606 GN=AHNAK PE=1 SV=2	37.44	0.000472456	95.0678	[2] Phospho (ST)	1	IKVPKIS*MPDVDL	819	sp|Q09666|AHNK_HUMAN	4880.07	6221.02	1554.03	64.3053	4638.96	64.3053	4880.07	64.3053	0.56961	1.66196	-6.24582	0	0.666667	0.0894392	0.247167	0.0894392	0.247167
ISMPDVDLHLK	sp|Q09666|AHNK_HUMAN	Q09666	AHNAK	Neuroblast differentiation-associated protein AHNAK OS=Homo sapiens OX=9606 GN=AHNAK PE=1 SV=2	19.77	0.00146787	83.2139	[2] Phospho (ST)|[3] Oxidation (M)	2	IKVPKIS*MPDVDL,KVPKISM*PDVDLH	819820	sp|Q09666|AHNK_HUMAN	1032.9	2700.42	3585.01	4978.03	2262.51	19264.5	2700.42	4978.03	0.531233	1.0338	0.882388	0	0	0.162533	0.349505	0.162533	0.349505
ISMQDVDLSLGSPK	sp|Q09666|AHNK_HUMAN	Q09666	AHNAK	Neuroblast differentiation-associated protein AHNAK OS=Homo sapiens OX=9606 GN=AHNAK PE=1 SV=2	128.54	0	95.2872	[12] Phospho (ST)	1	VDLSLGS*PKLKGD	511	sp|Q09666|AHNK_HUMAN	1.40222e+06	1.33941e+06	1.28461e+06	734986	975683	667593	1.33941e+06	734986	0.0438476	0.204307	-0.865807	0.333333	0.5	0.0321645	0.140064	0.0321645	0.140064
ISMSEVDLNVAAPK	sp|Q09666|AHNK_HUMAN	Q09666	AHNAK	Neuroblast differentiation-associated protein AHNAK OS=Homo sapiens OX=9606 GN=AHNAK PE=1 SV=2	88.52	0	94.922	[2] Phospho (ST)	1	TGTCRIS*MSEVDL	570	sp|Q09666|AHNK_HUMAN	1.09804e+06	1.36255e+06	1.51248e+06	475119	368958	91996	1.36255e+06	368958	0.15845	0.633942	-1.88478	0	0	0.01398	0.0887067	0.01398	0.0887067
ISMSEVDLNVAAPK	sp|Q09666|AHNK_HUMAN	Q09666	AHNAK	Neuroblast differentiation-associated protein AHNAK OS=Homo sapiens OX=9606 GN=AHNAK PE=1 SV=2	69.36	0.000206356	85.2467	[2] Phospho (ST)|[3] Oxidation (M)	2	TGTCRIS*MSEVDL,GTCRISM*SEVDLN	570571	sp|Q09666|AHNK_HUMAN	416676	531343	426566	258071	290741	264379	426566	264379	0.138677	0.0639349	-0.690158	0	0	0.0288154	0.130742	0.0288154	0.130742
KGDRSPEPGQTWTR	sp|Q09666|AHNK_HUMAN	Q09666	AHNAK	Neuroblast differentiation-associated protein AHNAK OS=Homo sapiens OX=9606 GN=AHNAK PE=1 SV=2	137.25	0	37.3939	[5] Phospho (ST)	1	HRKGDRS*PEPGQT	93	sp|Q09666|AHNK_HUMAN	1.88112e+08	2.0211e+08	1.67274e+08	187882404	2.60511e+08	281857453	1.88112e+08	2.60511e+08	0.0943297	0.202387	0.469756	0	0	0.245767	0.447072	0.245767	0.447072
LKSEDGVEGDLGETQSR	sp|Q09666|AHNK_HUMAN	Q09666	AHNAK	Neuroblast differentiation-associated protein AHNAK OS=Homo sapiens OX=9606 GN=AHNAK PE=1 SV=2	446.75	0	55.4477	[3] Phospho (ST)	1	IKPRLKS*EDGVEG	135	sp|Q09666|AHNK_HUMAN	4.95343e+07	7.54685e+07	5.53992e+07	1.17347e+07	1.63793e+07	3.59828e+07	5.53992e+07	1.63793e+07	0.226161	0.602375	-1.75799	0.0555556	0	0.0177625	0.101076	0.0177625	0.101076
LPDMSVKTPK	sp|Q09666|AHNK_HUMAN	Q09666	AHNAK	Neuroblast differentiation-associated protein AHNAK OS=Homo sapiens OX=9606 GN=AHNAK PE=1 SV=2	38.91	0.000489428	37.5784	[4] Oxidation (M)|[8] Phospho (ST)	2	DVKLPDM*SVKTPK,PDMSVKT*PKISMP	690694	sp|Q09666|AHNK_HUMAN	5349.13	243.967	2135.03	1298.59	151.484	9209.27	2135.03	1298.59	1.00192	1.38803	-0.717309	0.5	0.5	0.914423	0.953017	0.914423	0.953017
LPDMSVKTPK	sp|Q09666|AHNK_HUMAN	Q09666	AHNAK	Neuroblast differentiation-associated protein AHNAK OS=Homo sapiens OX=9606 GN=AHNAK PE=1 SV=2	63.67	0.000181127	62.888	[8] Phospho (ST)	1	PDMSVKT*PKISMP	694	sp|Q09666|AHNK_HUMAN	4370.36	3085.6	4688.62	3362.39	10378.9	70158.8	4370.36	10378.9	0.209646	1.31254	1.24782	0	0.333333	0.170142	0.359116	0.170142	0.359116
LPQFGISTPGSDLHVNAK	sp|Q09666|AHNK_HUMAN	Q09666	AHNAK	Neuroblast differentiation-associated protein AHNAK OS=Homo sapiens OX=9606 GN=AHNAK PE=1 SV=2	87.68	0	93.7252	[8] Phospho (ST)	1	PQFGIST*PGSDLH	5415	sp|Q09666|AHNK_HUMAN	614.388	9774.54	3821.95	2582.8	15208.3	909389	3821.95	15208.3	0.981245	1.68232	1.99248	0	0	0.186525	0.379354	0.186525	0.379354
LPSGSGAASPTGSAVDIR	sp|Q09666|AHNK_HUMAN	Q09666	AHNAK	Neuroblast differentiation-associated protein AHNAK OS=Homo sapiens OX=9606 GN=AHNAK PE=1 SV=2	60.7	0.000167448	75.2801	[3] Phospho (ST)|[5] Phospho (ST)|[9] Phospho (ST)	3	TVIRLPS*GSGAAS,IRLPSGS*GAASPT,SGSGAAS*PTGSAV	210212216	sp|Q09666|AHNK_HUMAN	458.743	64.3053	64.3053	2308.79	64.3053	2717.41	64.3053	2308.79	1.16316	0.841861	5.16606	0.666667	0.333333	0.185082	0.377584	0.185082	0.377584
LPSGSGAASPTGSAVDIR	sp|Q09666|AHNK_HUMAN	Q09666	AHNAK	Neuroblast differentiation-associated protein AHNAK OS=Homo sapiens OX=9606 GN=AHNAK PE=1 SV=2	85.32	0.000311429	75.4973	[3] Phospho (ST)|[9] Phospho (ST)	2	TVIRLPS*GSGAAS,SGSGAAS*PTGSAV	210216	sp|Q09666|AHNK_HUMAN	6.7844e+06	7.90749e+06	8.37434e+06	6.4643e+06	5.43284e+06	7.20627e+06	7.90749e+06	6.4643e+06	0.106289	0.139867	-0.290726	0	0	0.343078	0.5362	0.343078	0.5362
LPSGSGAASPTGSAVDIR	sp|Q09666|AHNK_HUMAN	Q09666	AHNAK	Neuroblast differentiation-associated protein AHNAK OS=Homo sapiens OX=9606 GN=AHNAK PE=1 SV=2	315.68	0	72.3709	[9] Phospho (ST)	1	SGSGAAS*PTGSAV	216	sp|Q09666|AHNK_HUMAN	6.36786e+07	4.30364e+07	4.80448e+07	6.02439e+07	4.04894e+07	8.28471e+07	4.80448e+07	6.02439e+07	0.208722	0.346357	0.326437	0.111111	0.166667	0.601996	0.74919	0.601996	0.74919
LPSGSGAASPTGSAVDIR	sp|Q09666|AHNK_HUMAN	Q09666	AHNAK	Neuroblast differentiation-associated protein AHNAK OS=Homo sapiens OX=9606 GN=AHNAK PE=1 SV=2	59.85	0.000163988	71.6603	[9] Phospho (ST)|[13] Phospho (ST)	2	SGSGAAS*PTGSAV,AASPTGS*AVDIRA	216220	sp|Q09666|AHNK_HUMAN	64932.1	43359.2	46032.7	173059	89587.7	162751	46032.7	162751	0.228602	0.320942	1.82194	0	0	0.0106735	0.0774052	0.0106735	0.0774052
LPTGQISGPEIK	sp|Q09666|AHNK_HUMAN	Q09666	AHNAK	Neuroblast differentiation-associated protein AHNAK OS=Homo sapiens OX=9606 GN=AHNAK PE=1 SV=2	16.37	0.00149997	80.3934	[7] Phospho (ST)	1	LPTGQIS*GPEIKG	5519	sp|Q09666|AHNK_HUMAN	10267.9	9135.28	15428.7	49595	2048.65	2819.27	10267.9	2819.27	0.28893	1.49998	-1.86475	0	0	0.564357	0.719704	0.564357	0.719704
LQGSGVSLASK	sp|Q09666|AHNK_HUMAN	Q09666	AHNAK	Neuroblast differentiation-associated protein AHNAK OS=Homo sapiens OX=9606 GN=AHNAK PE=1 SV=2	89.77	0	52.3749	[4] Phospho (ST)	1	TGKLQGS*GVSLAS	5851	sp|Q09666|AHNK_HUMAN	148634	195260	204893	409926	390992	591797	195260	409926	0.164482	0.238829	1.06997	0.166667	0.166667	0.00589807	0.0601896	0.00589807	0.0601896
LQGSGVSLASKK	sp|Q09666|AHNK_HUMAN	Q09666	AHNAK	Neuroblast differentiation-associated protein AHNAK OS=Homo sapiens OX=9606 GN=AHNAK PE=1 SV=2	40	0.000402698	42.2322	[10] Phospho (ST)	1	SGVSLAS*KKSRLS	5857	sp|Q09666|AHNK_HUMAN	5551.91	7138.11	1489.32	53330.3	20447.9	77791.7	5551.91	53330.3	0.616417	0.569535	3.2639	0	0	0.00556795	0.0588699	0.00556795	0.0588699
MPDVHFKSPQISMSDIDLNLK	sp|Q09666|AHNK_HUMAN	Q09666	AHNAK	Neuroblast differentiation-associated protein AHNAK OS=Homo sapiens OX=9606 GN=AHNAK PE=1 SV=2	61.59	0.00017135	96.5765	[8] Phospho (ST)	1	PDVHFKS*PQISMS	4516	sp|Q09666|AHNK_HUMAN	125078	107996	177515	193108	639906	13805.2	125078	193108	0.264693	1.14227	0.626578	0	0	0.911781	0.951472	0.911781	0.951472
MPEMHFKTPK	sp|Q09666|AHNK_HUMAN	Q09666	AHNAK	Neuroblast differentiation-associated protein AHNAK OS=Homo sapiens OX=9606 GN=AHNAK PE=1 SV=2	12.87	0.00186768	64.4158	[8] Phospho (ST)	1	PEMHFKT*PKISMP	1192	sp|Q09666|AHNK_HUMAN	1696.98	64.3053	1424.96	64.3053	2159.77	64.3053	1424.96	64.3053	0.823607	1.58603	-4.46984	0.333333	0.666667	0.507774	0.675046	0.507774	0.675046
MPFLSISSPK	sp|Q09666|AHNK_HUMAN	Q09666	AHNAK	Neuroblast differentiation-associated protein AHNAK OS=Homo sapiens OX=9606 GN=AHNAK PE=1 SV=2	22.55	0.0014112	90.5605	[1] Oxidation (M)|[8] Phospho (ST)	2	KGSKFKM*PFLSIS,PFLSISS*PKVSMP	34053412	sp|Q09666|AHNK_HUMAN	69110.7	49796.8	69640.5	86632.3	16143.6	38045.4	69110.7	38045.4	0.179905	0.768556	-0.861185	0	0	0.311248	0.507004	0.311248	0.507004
MPFLSISSPK	sp|Q09666|AHNK_HUMAN	Q09666	AHNAK	Neuroblast differentiation-associated protein AHNAK OS=Homo sapiens OX=9606 GN=AHNAK PE=1 SV=2	35.9	0.000454876	97.4941	[8] Phospho (ST)	1	PFLSISS*PKVSMP	3412	sp|Q09666|AHNK_HUMAN	186447	207501	186749	233565	41559.5	8433.25	186749	41559.5	0.062352	1.28599	-2.16785	0	0	0.124535	0.298352	0.124535	0.298352
MPSLEISAPK	sp|Q09666|AHNK_HUMAN	Q09666	AHNAK	Neuroblast differentiation-associated protein AHNAK OS=Homo sapiens OX=9606 GN=AHNAK PE=1 SV=2	47.4	0.000120729	90.5605	[3] Phospho (ST)	1	PSLKMPS*LEISAP	4908	sp|Q09666|AHNK_HUMAN	119381	111434	101548	111217	84975.6	45721.5	111434	84975.6	0.080642	0.408773	-0.391066	0	0	0.224618	0.423791	0.224618	0.423791
MPTFSTPGAK	sp|Q09666|AHNK_HUMAN	Q09666	AHNAK	Neuroblast differentiation-associated protein AHNAK OS=Homo sapiens OX=9606 GN=AHNAK PE=1 SV=2	39.1	0.000491981	68.5568	[6] Phospho (ST)	1	KMPTFST*PGAKGE	638	sp|Q09666|AHNK_HUMAN	21856.3	9943.23	19767.2	17741.2	25558.6	883249	19767.2	25558.6	0.370081	1.61069	0.370704	0	0.333333	0.216667	0.415023	0.216667	0.415023
MSLPDVDLDLK	sp|Q09666|AHNK_HUMAN	Q09666	AHNAK	Neuroblast differentiation-associated protein AHNAK OS=Homo sapiens OX=9606 GN=AHNAK PE=1 SV=2	34.56	0.000527102	95.4363	[1] Oxidation (M)|[2] Phospho (ST)	2	HFRAPKM*SLPDVD,FRAPKMS*LPDVDL	10671068	sp|Q09666|AHNK_HUMAN	21817.9	26172.2	33099.8	5037.25	4482.59	18063	26172.2	5037.25	0.210493	0.835905	-2.37732	0	0	0.0254658	0.122527	0.0254658	0.122527
MSLPDVDLDLK	sp|Q09666|AHNK_HUMAN	Q09666	AHNAK	Neuroblast differentiation-associated protein AHNAK OS=Homo sapiens OX=9606 GN=AHNAK PE=1 SV=2	57.99	0.000156912	98.4688	[2] Phospho (ST)	1	FRAPKMS*LPDVDL	1068	sp|Q09666|AHNK_HUMAN	57205.6	80672.2	83816.1	8028.99	14371.9	20296.7	80672.2	14371.9	0.196775	0.431058	-2.48882	0	0	0.00159773	0.0355134	0.00159773	0.0355134
MSLPDVDLDLKGPK	sp|Q09666|AHNK_HUMAN	Q09666	AHNAK	Neuroblast differentiation-associated protein AHNAK OS=Homo sapiens OX=9606 GN=AHNAK PE=1 SV=2	64.2	0.000183756	96.2048	[2] Phospho (ST)	1	FRAPKMS*LPDVDL	1068	sp|Q09666|AHNK_HUMAN	145669	176479	186806	40675	32555.5	370258	176479	40675	0.126152	1.30334	-2.11728	0	0.333333	0.308115	0.504135	0.308115	0.504135
MYFPDVEFDIKSPK	sp|Q09666|AHNK_HUMAN	Q09666	AHNAK	Neuroblast differentiation-associated protein AHNAK OS=Homo sapiens OX=9606 GN=AHNAK PE=1 SV=2	121.02	0	95.977	[1] Oxidation (M)|[12] Phospho (ST)	2	KTMFGKM*YFPDVE,VEFDIKS*PKFKAE	50885099	sp|Q09666|AHNK_HUMAN	635778	713940	619366	62632.3	191934	740534	635778	191934	0.0769931	1.08506	-1.72791	0	0	0.119173	0.2908	0.119173	0.2908
MYFPDVEFDIKSPK	sp|Q09666|AHNK_HUMAN	Q09666	AHNAK	Neuroblast differentiation-associated protein AHNAK OS=Homo sapiens OX=9606 GN=AHNAK PE=1 SV=2	136.1	0	97.734	[12] Phospho (ST)	1	VEFDIKS*PKFKAE	5099	sp|Q09666|AHNK_HUMAN	1.01814e+06	1.0759e+06	1.1541e+06	377862	331432	1.28137e+06	1.0759e+06	377862	0.0630256	0.807088	-1.50961	0	0	0.139545	0.318787	0.139545	0.318787
SKGHYEVTGSDDETGK	sp|Q09666|AHNK_HUMAN	Q09666	AHNAK	Neuroblast differentiation-associated protein AHNAK OS=Homo sapiens OX=9606 GN=AHNAK PE=1 SV=2	280.76	0	24.6895	[10] Phospho (ST)	1	HYEVTGS*DDETGK	5841	sp|Q09666|AHNK_HUMAN	1.86141e+07	1.47252e+07	1.80762e+07	2.34308e+07	1.75169e+07	5.92162e+07	1.80762e+07	2.34308e+07	0.122952	0.675768	0.374314	0	0.0666667	0.190405	0.38417	0.190405	0.38417
SKGHYEVTGSDDETGKLQGSGVSLASK	sp|Q09666|AHNK_HUMAN	Q09666	AHNAK	Neuroblast differentiation-associated protein AHNAK OS=Homo sapiens OX=9606 GN=AHNAK PE=1 SV=2	274.71	0	65.9165	[10] Phospho (ST)	1	HYEVTGS*DDETGK	5841	sp|Q09666|AHNK_HUMAN	2.26743e+07	1.80948e+07	1.92024e+07	1.93668e+07	4.65308e+07	5.6667e+07	1.92024e+07	4.65308e+07	0.119522	0.472085	1.2769	0.0833333	0.0833333	0.109607	0.276766	0.109607	0.276766
SKGHYEVTGSDDETGKLQGSGVSLASKK	sp|Q09666|AHNK_HUMAN	Q09666	AHNAK	Neuroblast differentiation-associated protein AHNAK OS=Homo sapiens OX=9606 GN=AHNAK PE=1 SV=2	50.39	0.000130242	60.2032	[10] Phospho (ST)	1	HYEVTGS*DDETGK	5841	sp|Q09666|AHNK_HUMAN	31538	122674	13084	7914.84	17583.7	7028.94	31538	7914.84	1.05217	0.539989	-1.99446	0	0	0.0825631	0.236438	0.0825631	0.236438
SNSFSDER	sp|Q09666|AHNK_HUMAN	Q09666	AHNAK	Neuroblast differentiation-associated protein AHNAK OS=Homo sapiens OX=9606 GN=AHNAK PE=1 SV=2	45.57	0.000115513	25.6902	[3] Phospho (ST)	1	PRHRSNS*FSDERE	5782	sp|Q09666|AHNK_HUMAN	1.08761e+07	1.07928e+07	7.64066e+06	1.26936e+07	1.02588e+07	2.88547e+07	1.07928e+07	1.26936e+07	0.188784	0.585272	0.234034	0	0	0.198302	0.393416	0.198302	0.393416
SNSFSDEREFSGPSTPTGTLEFEGGEVSLEGGK	sp|Q09666|AHNK_HUMAN	Q09666	AHNAK	Neuroblast differentiation-associated protein AHNAK OS=Homo sapiens OX=9606 GN=AHNAK PE=1 SV=2	145.07	0	95.5286	[11] Phospho (ST)	1	SDEREFS*GPSTPT	5790	sp|Q09666|AHNK_HUMAN	1.49407e+07	1.31213e+07	1.36515e+07	3.02288e+07	2.34176e+07	1.78027e+07	1.36515e+07	2.34176e+07	0.0672963	0.261274	0.778532	0	0	0.0522545	0.183741	0.0522545	0.183741
SNSFSDEREFSGPSTPTGTLEFEGGEVSLEGGK	sp|Q09666|AHNK_HUMAN	Q09666	AHNAK	Neuroblast differentiation-associated protein AHNAK OS=Homo sapiens OX=9606 GN=AHNAK PE=1 SV=2	103.85	0	96.1711	[14] Phospho (ST)|[15] Phospho (ST)	2	REFSGPS*TPTGTL,EFSGPST*PTGTLE	57935794	sp|Q09666|AHNK_HUMAN	379345	354664	480416	325258	157036	204883	379345	204883	0.1646	0.378408	-0.888711	0	0.333333	0.0574849	0.193548	0.0574849	0.193548
SPEPGQTWTR	sp|Q09666|AHNK_HUMAN	Q09666	AHNAK	Neuroblast differentiation-associated protein AHNAK OS=Homo sapiens OX=9606 GN=AHNAK PE=1 SV=2	38.51	0.00048506	51.6639	[1] Phospho (ST)	1	HRKGDRS*PEPGQT	93	sp|Q09666|AHNK_HUMAN	1.19624e+06	1.5044e+06	1.52821e+06	1.63729e+06	2.53236e+06	3.43378e+06	1.5044e+06	2.53236e+06	0.131364	0.354411	0.751297	0	0	0.0765551	0.226308	0.0765551	0.226308
SPQISMSDIDLNLK	sp|Q09666|AHNK_HUMAN	Q09666	AHNAK	Neuroblast differentiation-associated protein AHNAK OS=Homo sapiens OX=9606 GN=AHNAK PE=1 SV=2	27.37	0.00104159	97.1083	[1] Phospho (ST)	1	PDVHFKS*PQISMS	4516	sp|Q09666|AHNK_HUMAN	65136.6	60042.2	52302.1	48459.8	91952.2	60797.2	60042.2	60797.2	0.109238	0.334196	0.0180286	0	0	0.703182	0.820837	0.703182	0.820837
SRLSSSSSNDSGNK	sp|Q09666|AHNK_HUMAN	Q09666	AHNAK	Neuroblast differentiation-associated protein AHNAK OS=Homo sapiens OX=9606 GN=AHNAK PE=1 SV=2	46.83	0.000118835	14.5027	[4] Phospho (ST)	1	SKKSRLS*SSSSND	5863	sp|Q09666|AHNK_HUMAN	13231.8	5606.43	12022.1	814.843	740.744	7424.31	12022.1	814.843	0.398393	1.28205	-3.88303	0	0	0.0470684	0.173577	0.0470684	0.173577
SSKASLGSLEGEAEAEASSPK	sp|Q09666|AHNK_HUMAN	Q09666	AHNAK	Neuroblast differentiation-associated protein AHNAK OS=Homo sapiens OX=9606 GN=AHNAK PE=1 SV=2	129.22	0	88.9534	[2] Phospho (ST)|[5] Phospho (ST)|[8] Phospho (ST)	3	KGDLKSS*KASLGS,LKSSKAS*LGSLEG,SKASLGS*LEGEAE	574657495752	sp|Q09666|AHNK_HUMAN	133415	91278.1	50753.1	104196	373519	39689.8	91278.1	104196	0.45018	1.02672	0.190964	0	0	0.640904	0.777725	0.640904	0.777725
SSKASLGSLEGEAEAEASSPK	sp|Q09666|AHNK_HUMAN	Q09666	AHNAK	Neuroblast differentiation-associated protein AHNAK OS=Homo sapiens OX=9606 GN=AHNAK PE=1 SV=2	266.64	0	87.5018	[5] Phospho (ST)|[8] Phospho (ST)	2	LKSSKAS*LGSLEG,SKASLGS*LEGEAE	57495752	sp|Q09666|AHNK_HUMAN	3.94872e+06	3.64321e+06	4.1029e+06	1.00587e+07	1.99918e+07	8.36097e+06	3.94872e+06	1.00587e+07	0.0600166	0.490681	1.34899	0	0	0.00812128	0.0684808	0.00812128	0.0684808
SSKASLGSLEGEAEAEASSPK	sp|Q09666|AHNK_HUMAN	Q09666	AHNAK	Neuroblast differentiation-associated protein AHNAK OS=Homo sapiens OX=9606 GN=AHNAK PE=1 SV=2	50.74	0.000131475	85.5425	[5] Phospho (ST)|[8] Phospho (ST)|[18] Phospho (ST)	3	LKSSKAS*LGSLEG,SKASLGS*LEGEAE,EAEAEAS*SPKGKF	574957525762	sp|Q09666|AHNK_HUMAN	390799	475339	320298	1.20653e+06	2.41502e+06	386517	390799	1.20653e+06	0.196285	0.763785	1.62636	0	0	0.0954241	0.256412	0.0954241	0.256412
SSKASLGSLEGEAEAEASSPK	sp|Q09666|AHNK_HUMAN	Q09666	AHNAK	Neuroblast differentiation-associated protein AHNAK OS=Homo sapiens OX=9606 GN=AHNAK PE=1 SV=2	112.18	0	85.0229	[8] Phospho (ST)	1	SKASLGS*LEGEAE	5752	sp|Q09666|AHNK_HUMAN	177896	170465	206001	616607	805295	581920	177896	616607	0.101434	0.179971	1.79332	0	0	0.000692328	0.0243581	0.000692328	0.0243581
SSKASLGSLEGEAEAEASSPKGK	sp|Q09666|AHNK_HUMAN	Q09666	AHNAK	Neuroblast differentiation-associated protein AHNAK OS=Homo sapiens OX=9606 GN=AHNAK PE=1 SV=2	28.27	0.00106464	82.0543	[1] Phospho (ST)|[2] Phospho (ST)|[19] Phospho (ST)	3	SKGDLKS*SKASLG,KGDLKSS*KASLGS,AEAEASS*PKGKFS	574557465763	sp|Q09666|AHNK_HUMAN	13818.7	63122.4	65291.7	209013	661172	342834	63122.4	342834	0.614034	0.574441	2.44129	0	0	0.00705974	0.0645227	0.00705974	0.0645227
TGTCRISMSEVDLNVAAPK	sp|Q09666|AHNK_HUMAN	Q09666	AHNAK	Neuroblast differentiation-associated protein AHNAK OS=Homo sapiens OX=9606 GN=AHNAK PE=1 SV=2	83.77	0.000298507	91.6836	[7] Phospho (ST)	1	TGTCRIS*MSEVDL	570	sp|Q09666|AHNK_HUMAN	34140.6	163013	153515	36808.1	20058.4	57954.8	153515	36808.1	0.614425	0.496179	-2.06028	0	0.333333	0.112069	0.280535	0.112069	0.280535
TVIRLPSGSGAASPTGSAVDIR	sp|Q09666|AHNK_HUMAN	Q09666	AHNAK	Neuroblast differentiation-associated protein AHNAK OS=Homo sapiens OX=9606 GN=AHNAK PE=1 SV=2	44.22	0.000223914	89.5188	[13] Phospho (ST)	1	SGSGAAS*PTGSAV	216	sp|Q09666|AHNK_HUMAN	6466.32	119174	5165.79	13711.3	6854.27	5059.99	6466.32	6854.27	1.50109	0.53453	0.084059	0.333333	0	0.465468	0.6391	0.465468	0.6391
VDIDTPDIDIHGPEGK	sp|Q09666|AHNK_HUMAN	Q09666	AHNAK	Neuroblast differentiation-associated protein AHNAK OS=Homo sapiens OX=9606 GN=AHNAK PE=1 SV=2	148.4	0	85.2467	[5] Phospho (ST)	1	PKVDIDT*PDIDIH	4100	sp|Q09666|AHNK_HUMAN	1.69126e+06	1.76816e+06	2.01614e+06	1.83823e+06	2.15232e+06	3.19416e+06	1.76816e+06	2.15232e+06	0.0930223	0.296366	0.283648	0	0	0.30494	0.501837	0.30494	0.501837
VDIDTPDINIEGSEGK	sp|Q09666|AHNK_HUMAN	Q09666	AHNAK	Neuroblast differentiation-associated protein AHNAK OS=Homo sapiens OX=9606 GN=AHNAK PE=1 SV=2	17.86	0.00153846	87.8422	[5] Phospho (ST)	1	PKVDIDT*PDINIE	3716	sp|Q09666|AHNK_HUMAN	64.3053	64.3053	64.3053	1599.87	64.3053	64.3053	64.3053	64.3053	0	1.53874	0	1	0.666667	0.291353	0.490171	0.291353	0.490171
VDIETPNLEGTLTGPR	sp|Q09666|AHNK_HUMAN	Q09666	AHNAK	Neuroblast differentiation-associated protein AHNAK OS=Homo sapiens OX=9606 GN=AHNAK PE=1 SV=2	59.3	0.000161577	94.4032	[5] Phospho (ST)	1	SRVDIET*PNLEGT	545	sp|Q09666|AHNK_HUMAN	8007.15	13626.2	8032.64	1715.43	385.465	164720	8032.64	1715.43	0.327325	1.69937	-2.2273	0.333333	0	0.671746	0.80004	0.671746	0.80004
VDINTPDVDVHGPDWHLK	sp|Q09666|AHNK_HUMAN	Q09666	AHNAK	Neuroblast differentiation-associated protein AHNAK OS=Homo sapiens OX=9606 GN=AHNAK PE=1 SV=2	36.67	0.000463177	89.3325	[5] Phospho (ST)	1	PKVDINT*PDVDVH	4766	sp|Q09666|AHNK_HUMAN	25082.8	51738.6	26034.9	45801.8	45621.1	76753.5	26034.9	45801.8	0.441073	0.319707	0.814957	0	0	0.133039	0.309686	0.133039	0.309686
VDVKSPK	sp|Q09666|AHNK_HUMAN	Q09666	AHNAK	Neuroblast differentiation-associated protein AHNAK OS=Homo sapiens OX=9606 GN=AHNAK PE=1 SV=2	31.23	0.000894018	19.5408	[5] Phospho (ST)	1	LKVDVKS*PKTKKT	5077	sp|Q09666|AHNK_HUMAN	2.39911e+06	2.90281e+06	2.93544e+06	2.32524e+06	1.01199e+06	5.6652e+06	2.90281e+06	2.32524e+06	0.109503	0.799464	-0.320068	0	0	0.764975	0.862669	0.764975	0.862669
VEAPSLDVHMDSPDINIEGPDVK	sp|Q09666|AHNK_HUMAN	Q09666	AHNAK	Neuroblast differentiation-associated protein AHNAK OS=Homo sapiens OX=9606 GN=AHNAK PE=1 SV=2	10.73	0.00180575	92.0533	[10] Oxidation (M)|[12] Phospho (ST)	2	PSLDVHM*DSPDIN,LDVHMDS*PDINIE	49584960	sp|Q09666|AHNK_HUMAN	52153	36047.1	1634.28	29616.6	27898.3	64232.4	36047.1	29616.6	0.861795	0.505132	-0.283478	0	0.333333	0.367437	0.557708	0.367437	0.557708
VEAPSLDVHMDSPDINIEGPDVK	sp|Q09666|AHNK_HUMAN	Q09666	AHNAK	Neuroblast differentiation-associated protein AHNAK OS=Homo sapiens OX=9606 GN=AHNAK PE=1 SV=2	67.77	0.000198295	95.4858	[12] Phospho (ST)	1	LDVHMDS*PDINIE	4960	sp|Q09666|AHNK_HUMAN	100058	124232	151270	71693.6	134961	433018	124232	134961	0.204649	0.904951	0.119507	0	0	0.602781	0.749812	0.602781	0.749812
VESDLKGPEVDIEGPEGK	sp|Q09666|AHNK_HUMAN	Q09666	AHNAK	Neuroblast differentiation-associated protein AHNAK OS=Homo sapiens OX=9606 GN=AHNAK PE=1 SV=2	29.25	0.00100947	82.3937	[3] Phospho (ST)	1	SLPKVES*DLKGPE	4486	sp|Q09666|AHNK_HUMAN	6589.71	1991.21	1582.78	80422	14610.3	21193.5	1991.21	21193.5	0.820673	0.93557	3.41191	0.333333	0	0.00863525	0.0700578	0.00863525	0.0700578
VGIDTPDIDIHGPEGK	sp|Q09666|AHNK_HUMAN	Q09666	AHNAK	Neuroblast differentiation-associated protein AHNAK OS=Homo sapiens OX=9606 GN=AHNAK PE=1 SV=2	135.11	0	85.4013	[5] Phospho (ST)	1	PKVGIDT*PDIDIH	4564	sp|Q09666|AHNK_HUMAN	480268	661165	737758	360457	493779	625368	661165	493779	0.211079	0.268564	-0.421145	0	0	0.339653	0.532985	0.339653	0.532985
VHAPGLNLSGVGGK	sp|Q09666|AHNK_HUMAN	Q09666	AHNAK	Neuroblast differentiation-associated protein AHNAK OS=Homo sapiens OX=9606 GN=AHNAK PE=1 SV=2	107.1	0	82.93	[9] Phospho (ST)	1	APGLNLS*GVGGKM	5332	sp|Q09666|AHNK_HUMAN	35773.8	20818.4	50471.8	53441.8	13959.6	106149	35773.8	53441.8	0.415458	0.799521	0.579068	0.333333	0.5	0.680442	0.80536	0.680442	0.80536
VKTPEMIIQK	sp|Q09666|AHNK_HUMAN	Q09666	AHNAK	Neuroblast differentiation-associated protein AHNAK OS=Homo sapiens OX=9606 GN=AHNAK PE=1 SV=2	35.02	0.000534283	67.2461	[3] Phospho (ST)	1	KGTKVKT*PEMIIQ	490	sp|Q09666|AHNK_HUMAN	2325.2	2715.38	3109.87	64.3053	3329.9	64.3053	2715.38	64.3053	0.144411	1.63544	-5.40007	0	0.666667	0.0783489	0.230004	0.0783489	0.230004
VKTPEMIIQKPK	sp|Q09666|AHNK_HUMAN	Q09666	AHNAK	Neuroblast differentiation-associated protein AHNAK OS=Homo sapiens OX=9606 GN=AHNAK PE=1 SV=2	131.95	0	63.5837	[3] Phospho (ST)	1	KGTKVKT*PEMIIQ	490	sp|Q09666|AHNK_HUMAN	3.18328e+06	4.20286e+06	3.82333e+06	2.84488e+06	3.7886e+06	4.36362e+06	3.82333e+06	3.7886e+06	0.137913	0.20918	-0.013165	0	0	0.896786	0.943042	0.896786	0.943042
VKTPEMIIQKPK	sp|Q09666|AHNK_HUMAN	Q09666	AHNAK	Neuroblast differentiation-associated protein AHNAK OS=Homo sapiens OX=9606 GN=AHNAK PE=1 SV=2	222.48	0	51.0423	[3] Phospho (ST)|[6] Oxidation (M)	2	KGTKVKT*PEMIIQ,KVKTPEM*IIQKPK	490493	sp|Q09666|AHNK_HUMAN	3.44936e+06	3.45439e+06	3.66322e+06	6.21736e+06	7.8872e+06	5.26124e+06	3.45439e+06	6.21736e+06	0.0346492	0.205886	0.847872	0	0.266667	0.0232434	0.116161	0.0232434	0.116161
VKTPSFGISAPQVSIPDVNVNLK	sp|Q09666|AHNK_HUMAN	Q09666	AHNAK	Neuroblast differentiation-associated protein AHNAK OS=Homo sapiens OX=9606 GN=AHNAK PE=1 SV=2	51.05	0.000132679	98.1231	[5] Phospho (ST)	1	AKVKTPS*FGISAP	5186	sp|Q09666|AHNK_HUMAN	134532	195857	128785	27108.4	72640.1	320669	134532	72640.1	0.242888	1.1274	-0.889113	0	0	0.415883	0.600937	0.415883	0.600937
VQTPEVDVK	sp|Q09666|AHNK_HUMAN	Q09666	AHNAK	Neuroblast differentiation-associated protein AHNAK OS=Homo sapiens OX=9606 GN=AHNAK PE=1 SV=2	36.77	0.000464598	51.7627	[3] Phospho (ST)	1	SGSKVQT*PEVDVK	3366	sp|Q09666|AHNK_HUMAN	70971.4	72918.1	85684.8	22727.9	45582.3	575220	72918.1	45582.3	0.104441	1.45724	-0.677805	0	0	0.911454	0.951331	0.911454	0.951331
VSMPDVELNLKSPK	sp|Q09666|AHNK_HUMAN	Q09666	AHNAK	Neuroblast differentiation-associated protein AHNAK OS=Homo sapiens OX=9606 GN=AHNAK PE=1 SV=2	141.07	0	92.2445	[12] Phospho (ST)	1	VELNLKS*PKVKGD	3426	sp|Q09666|AHNK_HUMAN	5.43073e+06	9.23401e+06	9.0419e+06	2.53897e+06	2.23506e+06	651001	9.0419e+06	2.23506e+06	0.271129	0.560591	-2.01631	0	0	0.0107535	0.0777713	0.0107535	0.0777713
VSMPDVELNLKSPK	sp|Q09666|AHNK_HUMAN	Q09666	AHNAK	Neuroblast differentiation-associated protein AHNAK OS=Homo sapiens OX=9606 GN=AHNAK PE=1 SV=2	436.84	0	80.6256	[3] Oxidation (M)|[12] Phospho (ST)	2	SSPKVSM*PDVELN,VELNLKS*PKVKGD	34173426	sp|Q09666|AHNK_HUMAN	2.08346e+06	2.26208e+06	1.85803e+06	653672	790966	963837	2.08346e+06	790966	0.097917	0.193594	-1.39729	0.0606061	0.333333	0.00323355	0.0472194	0.00323355	0.0472194
VSVGAPDLSLEASEGSIK	sp|Q09666|AHNK_HUMAN	Q09666	AHNAK	Neuroblast differentiation-associated protein AHNAK OS=Homo sapiens OX=9606 GN=AHNAK PE=1 SV=2	34.98	0.000533618	93.4849	[16] Phospho (ST)	1	LEASEGS*IKLPKM	5400	sp|Q09666|AHNK_HUMAN	26324.5	10561.4	14307.1	20596.1	73893.1	83322.7	14307.1	73893.1	0.482603	0.570659	2.3687	0	0	0.0522688	0.183754	0.0522688	0.183754
VSVGAPDLSLEASEGSIK	sp|Q09666|AHNK_HUMAN	Q09666	AHNAK	Neuroblast differentiation-associated protein AHNAK OS=Homo sapiens OX=9606 GN=AHNAK PE=1 SV=2	66.63	0.000193125	94.3538	[2] Phospho (ST)	1	IKCPKVS*VGAPDL	5386	sp|Q09666|AHNK_HUMAN	10703.6	3858.8	13739.3	1239.41	4369.57	241424	10703.6	4369.57	0.536484	1.67317	-1.29253	0	0	0.848672	0.914416	0.848672	0.914416
VSVGAPDLSLEASEGSIKLPK	sp|Q09666|AHNK_HUMAN	Q09666	AHNAK	Neuroblast differentiation-associated protein AHNAK OS=Homo sapiens OX=9606 GN=AHNAK PE=1 SV=2	44.28	0.000224266	95.5286	[13] Phospho (ST)	1	DLSLEAS*EGSIKL	5397	sp|Q09666|AHNK_HUMAN	2886.28	10748.2	10556.7	42766.1	51623.7	61638.9	10556.7	51623.7	0.556172	0.181549	2.28988	0.333333	0	0.00335122	0.0473395	0.00335122	0.0473395
DAHDVSPTSTDTEAQLTVER	sp|Q8IVF2|AHNK2_HUMAN	Q8IVF2	AHNAK2	Protein AHNAK2 OS=Homo sapiens OX=9606 GN=AHNAK2 PE=1 SV=2	67.15	0.000195427	70.5925	[6] Phospho (ST)|[10] Phospho (ST)	2	RDAHDVS*PTSTDT,DVSPTST*DTEAQL	294298	sp|Q8IVF2|AHNK2_HUMAN	29289.5	28227.1	17866.3	33135.3	63189.2	68503.7	28227.1	63189.2	0.251153	0.347122	1.1626	0	0	0.0410439	0.160043	0.0410439	0.160043
DAHDVSPTSTDTEAQLTVER	sp|Q8IVF2|AHNK2_HUMAN	Q8IVF2	AHNAK2	Protein AHNAK2 OS=Homo sapiens OX=9606 GN=AHNAK2 PE=1 SV=2	70.31	0.000212044	72.3709	[6] Phospho (ST)|[9] Phospho (ST)	2	RDAHDVS*PTSTDT,HDVSPTS*TDTEAQ	294297	sp|Q8IVF2|AHNK2_HUMAN	10113.7	4318.49	21477	1061.24	94506	207920	10113.7	94506	0.729217	1.024	3.22409	0	0	0.50511	0.672757	0.50511	0.672757
DAHDVSPTSTDTEAQLTVER	sp|Q8IVF2|AHNK2_HUMAN	Q8IVF2	AHNAK2	Protein AHNAK2 OS=Homo sapiens OX=9606 GN=AHNAK2 PE=1 SV=2	112.18	0	71.2544	[9] Phospho (ST)	1	HDVSPTS*TDTEAQ	297	sp|Q8IVF2|AHNK2_HUMAN	3.05057e+06	2.51449e+06	2.47653e+06	7.08872e+06	8.00384e+06	1.6452e+07	2.51449e+06	8.00384e+06	0.119761	0.490929	1.67042	0	0	0.00431514	0.0528105	0.00431514	0.0528105
DAHDVSPTSTDTEAQLTVER	sp|Q8IVF2|AHNK2_HUMAN	Q8IVF2	AHNAK2	Protein AHNAK2 OS=Homo sapiens OX=9606 GN=AHNAK2 PE=1 SV=2	65.82	0.000190259	72.3709	[9] Phospho (ST)|[10] Phospho (ST)	2	HDVSPTS*TDTEAQ,DVSPTST*DTEAQL	297298	sp|Q8IVF2|AHNK2_HUMAN	199.608	2599.94	3383.96	11536.1	13712.8	10527.7	2599.94	11536.1	0.804949	0.136503	2.1496	0	0	0.0289013	0.130955	0.0289013	0.130955
EKEDTDVADGCRETPTK	sp|Q8IVF2|AHNK2_HUMAN	Q8IVF2	AHNAK2	Protein AHNAK2 OS=Homo sapiens OX=9606 GN=AHNAK2 PE=1 SV=2	69.69	0.000208073	26.0844	[14] Phospho (ST)	1	ADGCRET*PTKTLE	228	sp|Q8IVF2|AHNK2_HUMAN	130.764	4474.2	2167.65	120187	151621	1.46571e+06	2167.65	151621	0.962603	1.3259	6.1282	0	0	0.00324664	0.0472194	0.00324664	0.0472194
EKEDTDVADGCRETPTKTLEGDGDQER	sp|Q8IVF2|AHNK2_HUMAN	Q8IVF2	AHNAK2	Protein AHNAK2 OS=Homo sapiens OX=9606 GN=AHNAK2 PE=1 SV=2	12.64	0.00186094	51.4115	[5] Phospho (ST)	1	GKEKEDT*DVADGC	219	sp|Q8IVF2|AHNK2_HUMAN	5512.78	14476.9	16665.9	42375.5	96467.6	55884.7	14476.9	55884.7	0.483658	0.433723	1.9487	0	0	0.00558286	0.0589888	0.00558286	0.0589888
ERLSWPK	sp|Q8IVF2|AHNK2_HUMAN	Q8IVF2	AHNAK2	Protein AHNAK2 OS=Homo sapiens OX=9606 GN=AHNAK2 PE=1 SV=2	15.58	0.001657	70.6413	[4] Phospho (ST)	1	SQRERLS*WPKFQS	260	sp|Q8IVF2|AHNK2_HUMAN	527475	472813	484687	2.59975e+06	2.98735e+06	3.41561e+06	484687	2.98735e+06	0.0580841	0.135992	2.62374	0	0	8.39e-05	0.00902098	8.39e-05	0.00902098
FKIPSLGWSPSK	sp|Q8IVF2|AHNK2_HUMAN	Q8IVF2	AHNAK2	Protein AHNAK2 OS=Homo sapiens OX=9606 GN=AHNAK2 PE=1 SV=2	86.92	0	97.0628	[9] Phospho (ST)	1	IPSLGWS*PSKHTK	593	sp|Q8IVF2|AHNK2_HUMAN	464638	368160	255874	534979	793128	1.32839e+06	368160	793128	0.287915	0.457019	1.10722	0	0	0.0367837	0.150784	0.0367837	0.150784
HDLSTEGDSR	sp|Q8IVF2|AHNK2_HUMAN	Q8IVF2	AHNAK2	Protein AHNAK2 OS=Homo sapiens OX=9606 GN=AHNAK2 PE=1 SV=2	30.9	0.000886096	19.496	[4] Phospho (ST)	1	LPKHDLS*TEGDSR	5128	sp|Q8IVF2|AHNK2_HUMAN	884.127	1178.82	64.3053	64.3053	64.3053	64.3053	884.127	64.3053	0.814442	0	-3.78124	0.333333	1	0.0635287	0.203828	0.0635287	0.203828
IPSLGWSPSK	sp|Q8IVF2|AHNK2_HUMAN	Q8IVF2	AHNAK2	Protein AHNAK2 OS=Homo sapiens OX=9606 GN=AHNAK2 PE=1 SV=2	35.98	0.000455498	92.1538	[7] Phospho (ST)	1	IPSLGWS*PSKHTK	593	sp|Q8IVF2|AHNK2_HUMAN	31978	25605.3	18494.9	175523	48730.9	14671.9	25605.3	48730.9	0.265973	1.06431	0.928392	0	0	0.31667	0.51214	0.31667	0.51214
KPDAEVLTVESPEEEAMTK	sp|Q8IVF2|AHNK2_HUMAN	Q8IVF2	AHNAK2	Protein AHNAK2 OS=Homo sapiens OX=9606 GN=AHNAK2 PE=1 SV=2	50.96	0.000132328	82.3442	[11] Phospho (ST)	1	EVLTVES*PEEEAM	5175	sp|Q8IVF2|AHNK2_HUMAN	73761.6	54800.4	93291	216102	220227	64376.2	73761.6	216102	0.260253	0.532131	1.55077	0	0	0.136583	0.314673	0.136583	0.314673
KPDAEVLTVESPEEEAMTK	sp|Q8IVF2|AHNK2_HUMAN	Q8IVF2	AHNAK2	Protein AHNAK2 OS=Homo sapiens OX=9606 GN=AHNAK2 PE=1 SV=2	137.96	0	73.7395	[11] Phospho (ST)|[17] Oxidation (M)	2	EVLTVES*PEEEAM,SPEEEAM*TKYSQE	51755181	sp|Q8IVF2|AHNK2_HUMAN	29351.7	35109.2	31693.9	108206	210723	122676	31693.9	122676	0.0903344	0.376932	1.95258	0.166667	0.166667	0.00109899	0.029359	0.00109899	0.029359
LCEGTPQEGGLR	sp|Q8IVF2|AHNK2_HUMAN	Q8IVF2	AHNAK2	Protein AHNAK2 OS=Homo sapiens OX=9606 GN=AHNAK2 PE=1 SV=2	37.83	0.000477418	48.3268	[5] Phospho (ST)	1	PRLCEGT*PQEGGL	408	sp|Q8IVF2|AHNK2_HUMAN	7297.36	1116.79	2728.11	3146.98	3694.73	634666	2728.11	3694.73	0.863223	1.70434	0.437569	0	0	0.261799	0.464524	0.261799	0.464524
LDLKSPK	sp|Q8IVF2|AHNK2_HUMAN	Q8IVF2	AHNAK2	Protein AHNAK2 OS=Homo sapiens OX=9606 GN=AHNAK2 PE=1 SV=2	33.69	0.000602825	40.2768	[5] Phospho (ST)	1	PKLDLKS*PKAEVT	1112	sp|Q8IVF2|AHNK2_HUMAN	113381	153926	165437	355310	452834	546795	153926	452834	0.189561	0.211998	1.55675	0	0	0.0023824	0.0416717	0.0023824	0.0416717
LGFSSSPTK	sp|Q8IVF2|AHNK2_HUMAN	Q8IVF2	AHNAK2	Protein AHNAK2 OS=Homo sapiens OX=9606 GN=AHNAK2 PE=1 SV=2	44.33	0.000224442	57.5638	[6] Phospho (ST)	1	KLGFSSS*PTKKSK	5707	sp|Q8IVF2|AHNK2_HUMAN	267045	243975	286336	531692	774419	545394	267045	545394	0.0797962	0.220937	1.03022	0	0	0.00644617	0.0617523	0.00644617	0.0617523
MPSFGMLSPGK	sp|Q8IVF2|AHNK2_HUMAN	Q8IVF2	AHNAK2	Protein AHNAK2 OS=Homo sapiens OX=9606 GN=AHNAK2 PE=1 SV=2	21.66	0.00138678	73.4686	[1] Oxidation (M)|[6] Oxidation (M)|[8] Phospho (ST)	3	KMPKFKM*PSFGML,KMPSFGM*LSPGKS,PSFGMLS*PGKSIE	447044754477	sp|Q8IVF2|AHNK2_HUMAN	850.908	1626.99	64.3053	1181.99	64.3053	5565.38	850.908	1181.99	0.922052	1.28057	0.47414	0.333333	0.333333	0.723068	0.834856	0.723068	0.834856
MPSFGMLSPGK	sp|Q8IVF2|AHNK2_HUMAN	Q8IVF2	AHNAK2	Protein AHNAK2 OS=Homo sapiens OX=9606 GN=AHNAK2 PE=1 SV=2	12.51	0.00185612	88.4347	[1] Oxidation (M)|[8] Phospho (ST)	2	KMPKFKM*PSFGML,PSFGMLS*PGKSIE	44704477	sp|Q8IVF2|AHNK2_HUMAN	64.3053	1957.18	64.3053	1357.95	64.3053	3620.66	64.3053	1357.95	1.57185	1.07084	4.40035	0.666667	0.333333	0.423533	0.60669	0.423533	0.60669
MPSFGMLSPGK	sp|Q8IVF2|AHNK2_HUMAN	Q8IVF2	AHNAK2	Protein AHNAK2 OS=Homo sapiens OX=9606 GN=AHNAK2 PE=1 SV=2	18.71	0.00156309	87.6527	[6] Oxidation (M)|[8] Phospho (ST)	2	KMPSFGM*LSPGKS,PSFGMLS*PGKSIE	44754477	sp|Q8IVF2|AHNK2_HUMAN	10835.2	12297.9	6113.27	12695.2	64.3053	64.3053	10835.2	64.3053	0.331556	1.70599	-7.39658	0	0.666667	0.0802639	0.232813	0.0802639	0.232813
MPSFGMLSPGK	sp|Q8IVF2|AHNK2_HUMAN	Q8IVF2	AHNAK2	Protein AHNAK2 OS=Homo sapiens OX=9606 GN=AHNAK2 PE=1 SV=2	49.47	0.000127486	95.6775	[8] Phospho (ST)	1	PSFGMLS*PGKSIE	4477	sp|Q8IVF2|AHNK2_HUMAN	6550.82	13051.9	15621.4	64.3053	64.3053	64.3053	13051.9	64.3053	0.398176	0	-7.6651	0	1	3.01e-06	0.00115786	3.01e-06	0.00115786
MPSFGVSAPGK	sp|Q8IVF2|AHNK2_HUMAN	Q8IVF2	AHNAK2	Protein AHNAK2 OS=Homo sapiens OX=9606 GN=AHNAK2 PE=1 SV=2	28.16	0.00106173	70.8455	[1] Oxidation (M)|[3] Phospho (ST)	2	KMPKFKM*PSFGVS,PKFKMPS*FGVSAP	840842	sp|Q8IVF2|AHNK2_HUMAN	547.218	801.127	64.3053	64.3053	1109.51	2613.85	547.218	1109.51	0.794878	1.01512	1.01973	0.333333	0.333333	0.610221	0.755189	0.610221	0.755189
MPSLRR	sp|Q8IVF2|AHNK2_HUMAN	Q8IVF2	AHNAK2	Protein AHNAK2 OS=Homo sapiens OX=9606 GN=AHNAK2 PE=1 SV=2	14.19	0.0017326	25.3933	[1] Oxidation (M)|[3] Phospho (ST)	2	KMPKFRM*PSLRRS,PKFRMPS*LRRSFR	51975199	sp|Q8IVF2|AHNK2_HUMAN	29300.3	21006.2	12403.9	14947.2	30164.5	22083.3	21006.2	22083.3	0.404176	0.339914	0.0721392	0	0	0.790237	0.878497	0.790237	0.878497
MPSLRR	sp|Q8IVF2|AHNK2_HUMAN	Q8IVF2	AHNAK2	Protein AHNAK2 OS=Homo sapiens OX=9606 GN=AHNAK2 PE=1 SV=2	18.03	0.00154292	43.2341	[3] Phospho (ST)	1	PKFRMPS*LRRSFR	5199	sp|Q8IVF2|AHNK2_HUMAN	25545.8	27425.3	17249.9	46635.6	46003.1	98703.6	25545.8	46635.6	0.231314	0.474214	0.868345	0	0	0.0194927	0.106181	0.0194927	0.106181
QLQPGEPGAETEDDHSVTEGPADEGIRPR	sp|Q8IVF2|AHNK2_HUMAN	Q8IVF2	AHNAK2	Protein AHNAK2 OS=Homo sapiens OX=9606 GN=AHNAK2 PE=1 SV=2	28.91	0.00100193	69.4795	[16] Phospho (ST)	1	ETEDDHS*VTEGPA	38	sp|Q8IVF2|AHNK2_HUMAN	680239	639430	567466	1.21542e+06	1.61567e+06	1.07192e+06	639430	1.21542e+06	0.0907717	0.2166	0.926596	0	0	0.0125471	0.0839248	0.0125471	0.0839248
RLSTPQR	sp|Q8IVF2|AHNK2_HUMAN	Q8IVF2	AHNAK2	Protein AHNAK2 OS=Homo sapiens OX=9606 GN=AHNAK2 PE=1 SV=2	28.97	0.00100332	23.542	[3] Phospho (ST)	1	ERERRLS*TPQRGK	509	sp|Q8IVF2|AHNK2_HUMAN	326265	564169	577338	103877	262033	522248	564169	262033	0.288824	0.713555	-1.10638	0	0	0.194973	0.389555	0.194973	0.389555
SHSSSEAYEPR	sp|Q8IVF2|AHNK2_HUMAN	Q8IVF2	AHNAK2	Protein AHNAK2 OS=Homo sapiens OX=9606 GN=AHNAK2 PE=1 SV=2	43.95	0.000222296	25.4799	[3] Phospho (ST)	1	GPQRSHS*SSEAYE	280	sp|Q8IVF2|AHNK2_HUMAN	2.18955e+06	2.39421e+06	1.7275e+06	6.26449e+06	5.71313e+06	1.33938e+07	2.18955e+06	6.26449e+06	0.162344	0.506571	1.51656	0	0	0.00471547	0.0547119	0.00471547	0.0547119
SKSTEDGAELEEQK	sp|Q8IVF2|AHNK2_HUMAN	Q8IVF2	AHNAK2	Protein AHNAK2 OS=Homo sapiens OX=9606 GN=AHNAK2 PE=1 SV=2	70.73	0.00021427	31.2546	[3] Phospho (ST)	1	PTKKSKS*TEDGAE	5714	sp|Q8IVF2|AHNK2_HUMAN	11773.4	21986.1	14155.3	31207.3	38524.9	75000.5	14155.3	38524.9	0.334538	0.486248	1.44445	0	0	0.0168711	0.0984008	0.0168711	0.0984008
TTDLSIQSPSADLEVQAGQVDVK	sp|Q8IVF2|AHNK2_HUMAN	Q8IVF2	AHNAK2	Protein AHNAK2 OS=Homo sapiens OX=9606 GN=AHNAK2 PE=1 SV=2	107.14	0	94.4536	[8] Phospho (ST)	1	TDLSIQS*PSADLE	4185	sp|Q8IVF2|AHNK2_HUMAN	33372.7	96355.9	30926.2	36301.3	160933	127643	33372.7	127643	0.6926	0.595885	1.93538	0	0	0.251097	0.452931	0.251097	0.452931
TTDLSIQSPSADLEVQAGQVNVK	sp|Q8IVF2|AHNK2_HUMAN	Q8IVF2	AHNAK2	Protein AHNAK2 OS=Homo sapiens OX=9606 GN=AHNAK2 PE=1 SV=2	102.37	0	94.0153	[8] Phospho (ST)	1	TDLSIQS*PSADLE	1710	sp|Q8IVF2|AHNK2_HUMAN	77781.4	78518.5	57974.8	173493	138755	173691	77781.4	173493	0.163164	0.124174	1.15739	0	0	0.00629876	0.0615629	0.00629876	0.0615629
VDLKSPQVDIK	sp|Q8IVF2|AHNK2_HUMAN	Q8IVF2	AHNAK2	Protein AHNAK2 OS=Homo sapiens OX=9606 GN=AHNAK2 PE=1 SV=2	89.24	0	74.3219	[5] Phospho (ST)	1	PKVDLKS*PQVDIK	3408	sp|Q8IVF2|AHNK2_HUMAN	53450.7	45705.2	55547.3	177085	239106	353806	53450.7	239106	0.100532	0.349323	2.16137	0	0.166667	0.000812398	0.0266051	0.000812398	0.0266051
VEVTSPNLDVSLPSMEVDIQAPGAK	sp|Q8IVF2|AHNK2_HUMAN	Q8IVF2	AHNAK2	Protein AHNAK2 OS=Homo sapiens OX=9606 GN=AHNAK2 PE=1 SV=2	135.86	0	99.0654	[5] Phospho (ST)	1	PKVEVTS*PNLDVS	4419	sp|Q8IVF2|AHNK2_HUMAN	149007	181074	214181	200248	360365	693996	181074	360365	0.179629	0.602349	0.99288	0	0	0.0926563	0.251978	0.0926563	0.251978
VQCPLPSTQLPSPGTCVSQGPEELVASLQTSVVAPGEAPSEDADHEGKGSPLK	sp|Q8IVF2|AHNK2_HUMAN	Q8IVF2	AHNAK2	Protein AHNAK2 OS=Homo sapiens OX=9606 GN=AHNAK2 PE=1 SV=2	10.93	0.00181149	98.718	[50] Phospho (ST)	1	DHEGKGS*PLKMPK	4951	sp|Q8IVF2|AHNK2_HUMAN	389675	366755	292029	1.65034e+06	1.83411e+06	1.28328e+06	366755	1.65034e+06	0.146106	0.176468	2.16988	0	0	0.000385354	0.0191857	0.000385354	0.0191857
VQRPSLK	sp|Q8IVF2|AHNK2_HUMAN	Q8IVF2	AHNAK2	Protein AHNAK2 OS=Homo sapiens OX=9606 GN=AHNAK2 PE=1 SV=2	23.56	0.0013003	33.4546	[5] Phospho (ST)	1	PKVQRPS*LKMPKV	765	sp|Q8IVF2|AHNK2_HUMAN	63365.8	75390.1	84889.4	154857	146075	1.08195e+06	75390.1	154857	0.144691	1.16671	1.03849	0	0	0.0607714	0.199123	0.0607714	0.199123
VYTTMTQHSR	sp|Q8IVF2|AHNK2_HUMAN	Q8IVF2	AHNAK2	Protein AHNAK2 OS=Homo sapiens OX=9606 GN=AHNAK2 PE=1 SV=2	62.57	0.000175346	19.4002	[5] Oxidation (M)|[9] Phospho (ST)	2	ARVYTTM*TQHSRT,TTMTQHS*RTQEGT	55385542	sp|Q8IVF2|AHNK2_HUMAN	58708.9	4725.31	21896	18280.6	35975.4	26907.6	21896	26907.6	0.969677	0.327055	0.297346	0	0.166667	0.610799	0.755715	0.610799	0.755715
CDSSPDSAEDVR	sp|P02765|FETUA_HUMAN	P02765	AHSG	Alpha-2-HS-glycoprotein OS=Homo sapiens OX=9606 GN=AHSG PE=1 SV=2	87.73	0	30.0613	[7] Phospho (ST)	1	CDSSPDS*AEDVRK	138	sp|P02765|FETUA_HUMAN	929310	977191	763557	802719	3.57491e+06	3.74879e+06	929310	3.57491e+06	0.125959	0.610234	1.94367	0.166667	0	0.0986286	0.260594	0.0986286	0.260594
CDSSPDSAEDVRK	sp|P02765|FETUA_HUMAN	P02765	AHSG	Alpha-2-HS-glycoprotein OS=Homo sapiens OX=9606 GN=AHSG PE=1 SV=2	96.84	0	23.9281	[7] Phospho (ST)	1	CDSSPDS*AEDVRK	138	sp|P02765|FETUA_HUMAN	2.9798e+07	3.41143e+07	3.01812e+07	8.99259e+06	7.50702e+07	4.90992e+07	3.01812e+07	4.90992e+07	0.0761711	0.749986	0.702049	0	0	0.965677	0.981991	0.965677	0.981991
SLSAIDR	sp|O95831|AIFM1_HUMAN	O95831	AIFM1	Apoptosis-inducing factor 1, mitochondrial OS=Homo sapiens OX=9606 GN=AIFM1 PE=1 SV=1	47.52	0.000121212	55.5772	[3] Phospho (ST)	1	GTPRSLS*AIDRAG	268	sp|O95831|AIFM1_HUMAN	120942	217673	165126	107119	90878.1	73693.1	165126	90878.1	0.288397	0.184569	-0.861559	0	0	0.0461764	0.171607	0.0461764	0.171607
GAQPGRHSVTGYGDCAVGAR	sp|Q96IF1|AJUBA_HUMAN	Q96IF1	AJUBA	LIM domain-containing protein ajuba OS=Homo sapiens OX=9606 GN=AJUBA PE=1 SV=1	123.6	0	44.948	[8] Phospho (ST)	1	AQPGRHS*VTGYGD	263	sp|Q96IF1|AJUBA_HUMAN	1.01497e+06	1.72936e+06	2.30653e+06	3.29781e+06	3.06076e+06	3.52846e+06	1.72936e+06	3.29781e+06	0.384286	0.0709592	0.931276	0	0	0.035311	0.147732	0.035311	0.147732
GSFEAPR	sp|Q96IF1|AJUBA_HUMAN	Q96IF1	AJUBA	LIM domain-containing protein ajuba OS=Homo sapiens OX=9606 GN=AJUBA PE=1 SV=1	32.8	0.000759045	40.036	[2] Phospho (ST)	1	ERNQRGS*FEAPRY	79	sp|Q96IF1|AJUBA_HUMAN	348994	367584	387816	228839	382201	320434	367584	320434	0.0527429	0.248519	-0.198046	0	0	0.395841	0.583293	0.395841	0.583293
HSVTGYGDCAVGAR	sp|Q96IF1|AJUBA_HUMAN	Q96IF1	AJUBA	LIM domain-containing protein ajuba OS=Homo sapiens OX=9606 GN=AJUBA PE=1 SV=1	33.28	0.000767984	46.1095	[2] Phospho (ST)	1	AQPGRHS*VTGYGD	263	sp|Q96IF1|AJUBA_HUMAN	35157.7	104078	84159.8	235295	173994	494393	84159.8	235295	0.476305	0.564595	1.48327	0	0	0.0172146	0.0995527	0.0172146	0.0995527
HSYPPALGSPGALAGAGVGAAGPLER	sp|Q96IF1|AJUBA_HUMAN	Q96IF1	AJUBA	LIM domain-containing protein ajuba OS=Homo sapiens OX=9606 GN=AJUBA PE=1 SV=1	206.04	0	95.1446	[2] Phospho (ST)	1	CQESRHS*YPPALG	230	sp|Q96IF1|AJUBA_HUMAN	1.71483e+06	1.84437e+06	1.61105e+06	3.40833e+06	2.22019e+06	3.46011e+06	1.71483e+06	3.40833e+06	0.0678299	0.23152	0.991002	0	0	0.0411061	0.160176	0.0411061	0.160176
LEPTAPALSPR	sp|Q96IF1|AJUBA_HUMAN	Q96IF1	AJUBA	LIM domain-containing protein ajuba OS=Homo sapiens OX=9606 GN=AJUBA PE=1 SV=1	42.53	0.000214523	74.7919	[9] Phospho (ST)	1	PTAPALS*PRSSFA	119	sp|Q96IF1|AJUBA_HUMAN	2.26645e+06	2.10274e+06	2.2048e+06	1.48687e+06	1.65901e+06	2.024e+06	2.2048e+06	1.65901e+06	0.0377331	0.159155	-0.410331	0	0	0.222197	0.420814	0.222197	0.420814
LYAQRPAGFGCQESRHSYPPALGSPGALAGAGVGAAGPLER	sp|Q96IF1|AJUBA_HUMAN	Q96IF1	AJUBA	LIM domain-containing protein ajuba OS=Homo sapiens OX=9606 GN=AJUBA PE=1 SV=1	45.68	0.000115781	93.3807	[24] Phospho (ST)	1	YPPALGS*PGALAG	237	sp|Q96IF1|AJUBA_HUMAN	646765	670073	702734	1.30279e+06	1.60041e+06	2.21088e+06	670073	1.60041e+06	0.041763	0.271567	1.25605	0	0	0.00579873	0.0598705	0.00579873	0.0598705
NQRGSFEAPR	sp|Q96IF1|AJUBA_HUMAN	Q96IF1	AJUBA	LIM domain-containing protein ajuba OS=Homo sapiens OX=9606 GN=AJUBA PE=1 SV=1	23.66	0.00130316	34.0553	[5] Phospho (ST)	1	ERNQRGS*FEAPRY	79	sp|Q96IF1|AJUBA_HUMAN	108623	142195	127560	76463.7	155275	97563.6	127560	97563.6	0.133455	0.371681	-0.38676	0	0	0.50452	0.672415	0.50452	0.672415
PAGFGCQESRHSYPPALGSPGALAGAGVGAAGPLER	sp|Q96IF1|AJUBA_HUMAN	Q96IF1	AJUBA	LIM domain-containing protein ajuba OS=Homo sapiens OX=9606 GN=AJUBA PE=1 SV=1	26.93	0.00110497	94.6028	[12] Phospho (ST)	1	CQESRHS*YPPALG	230	sp|Q96IF1|AJUBA_HUMAN	246016	246833	276927	479454	343224	425425	246833	425425	0.0686521	0.164887	0.785372	0	0	0.0454187	0.17003	0.0454187	0.17003
SSFASSSASDASKPSSPR	sp|Q96IF1|AJUBA_HUMAN	Q96IF1	AJUBA	LIM domain-containing protein ajuba OS=Homo sapiens OX=9606 GN=AJUBA PE=1 SV=1	157.36	0	35.2298	[16] Phospho (ST)	1	DASKPSS*PRGSLL	137	sp|Q96IF1|AJUBA_HUMAN	4.84148e+07	4.26396e+07	4.16101e+07	3.63869e+07	8.48847e+06	1.46434e+07	4.26396e+07	1.46434e+07	0.0829417	0.738782	-1.54194	0	0.166667	0.0507447	0.180807	0.0507447	0.180807
KTESFQNAQAGSNPK	sp|Q92667|AKAP1_HUMAN	Q92667	AKAP1	A-kinase anchor protein 1, mitochondrial OS=Homo sapiens OX=9606 GN=AKAP1 PE=1 SV=1	64.02	0.000182815	29.0435	[4] Phospho (ST)	1	SLKKTES*FQNAQA	592	sp|Q92667|AKAP1_HUMAN	11964.1	30025.5	26861.6	120196	17441.9	64980.8	26861.6	64980.8	0.420257	0.761404	1.27447	0	0	0.172115	0.361717	0.172115	0.361717
SAEVCKQDSPFSR	sp|Q92667|AKAP1_HUMAN	Q92667	AKAP1	A-kinase anchor protein 1, mitochondrial OS=Homo sapiens OX=9606 GN=AKAP1 PE=1 SV=1	30.23	0.000953743	42.3	[9] Phospho (ST)	1	EVCKQDS*PFSRVP	169	sp|Q92667|AKAP1_HUMAN	10681.5	11386	7722.46	10698.8	8118.69	4477.99	10681.5	8118.69	0.195766	0.402495	-0.395797	0	0	0.35231	0.543925	0.35231	0.543925
SIPLECPLSSPK	sp|Q92667|AKAP1_HUMAN	Q92667	AKAP1	A-kinase anchor protein 1, mitochondrial OS=Homo sapiens OX=9606 GN=AKAP1 PE=1 SV=1	29.4	0.000935308	89.3823	[10] Phospho (ST)	1	LECPLSS*PKGVLF	151	sp|Q92667|AKAP1_HUMAN	354182	372789	313409	303855	206055	265722	354182	265722	0.0875791	0.190659	-0.414574	0	0	0.171963	0.36148	0.171963	0.36148
SLLSSPTK	sp|Q92667|AKAP1_HUMAN	Q92667	AKAP1	A-kinase anchor protein 1, mitochondrial OS=Homo sapiens OX=9606 GN=AKAP1 PE=1 SV=1	20.52	0.00148656	58.3979	[5] Phospho (ST)	1	LKSLLSS*PTKDSK	445	sp|Q92667|AKAP1_HUMAN	228620	284095	331635	215132	70783	97978.9	284095	97978.9	0.183189	0.599416	-1.53583	0	0	0.0404953	0.158775	0.0404953	0.158775
TVLGPDTAEPATAEAAVAPPDAGLPLPGLPAEGSPPPK	sp|Q92667|AKAP1_HUMAN	Q92667	AKAP1	A-kinase anchor protein 1, mitochondrial OS=Homo sapiens OX=9606 GN=AKAP1 PE=1 SV=1	50.49	0.000130634	99.7937	[34] Phospho (ST)	1	GLPAEGS*PPPKTY	429	sp|Q92667|AKAP1_HUMAN	896230	1.15751e+06	1.05447e+06	925878	566350	1.27211e+06	1.05447e+06	925878	0.127027	0.382985	-0.187626	0	0	0.557778	0.714326	0.557778	0.714326
ASISVHSPQK	sp|O43572|AKA10_HUMAN	O43572	AKAP10	A-kinase anchor protein 10, mitochondrial OS=Homo sapiens OX=9606 GN=AKAP10 PE=1 SV=2	40.25	0.000405145	31.6025	[7] Phospho (ST)	1	ASISVHS*PQKSTK	52	sp|O43572|AKA10_HUMAN	119016	154531	99021.6	70854	39619.4	91877.4	119016	70854	0.226378	0.389839	-0.748234	0	0	0.0669786	0.209334	0.0669786	0.209334
QSPRTLR	sp|O43572|AKA10_HUMAN	O43572	AKAP10	A-kinase anchor protein 10, mitochondrial OS=Homo sapiens OX=9606 GN=AKAP10 PE=1 SV=2	18.88	0.00156769	29.0435	[5] Phospho (ST)	1	PRQSPRT*LRPDPG	14	sp|O43572|AKA10_HUMAN	288454	485031	442096	155871	234272	434268	442096	234272	0.255072	0.522395	-0.916174	0	0	0.220199	0.418352	0.220199	0.418352
QSSLAEPVSPSKK	sp|O43572|AKA10_HUMAN	O43572	AKAP10	A-kinase anchor protein 10, mitochondrial OS=Homo sapiens OX=9606 GN=AKAP10 PE=1 SV=2	53.1	0.000139005	42.1976	[9] Phospho (ST)	1	SLAEPVS*PSKKHE	187	sp|O43572|AKA10_HUMAN	337180	267788	309530	397976	224259	318797	309530	318797	0.114599	0.277264	0.0425584	0	0	0.979578	0.989417	0.979578	0.989417
DRNVIPDTPPSTPLVPSR	sp|Q9UKA4|AKA11_HUMAN	Q9UKA4	AKAP11	A-kinase anchor protein 11 OS=Homo sapiens OX=9606 GN=AKAP11 PE=1 SV=1	30.59	0.000880423	92.2104	[8] Phospho (ST)	1	RNVIPDT*PPSTPL	1100	sp|Q9UKA4|AKA11_HUMAN	89532.3	108635	122061	4107.97	547.261	6474.23	108635	4107.97	0.153142	0.80421	-4.72492	0	0	0.00165094	0.0358243	0.00165094	0.0358243
EDSGLFSPIR	sp|Q9UKA4|AKA11_HUMAN	Q9UKA4	AKAP11	A-kinase anchor protein 11 OS=Homo sapiens OX=9606 GN=AKAP11 PE=1 SV=1	51.73	0.00013488	91.8458	[7] Phospho (ST)	1	EDSGLFS*PIRSSA	448	sp|Q9UKA4|AKA11_HUMAN	163535	171068	172208	98602.3	44059.5	81486.3	171068	81486.3	0.0278984	0.373341	-1.06994	0	0	0.0178037	0.101154	0.0178037	0.101154
ESLPVSGEESQLTPEKSPK	sp|Q9UKA4|AKA11_HUMAN	Q9UKA4	AKAP11	A-kinase anchor protein 11 OS=Homo sapiens OX=9606 GN=AKAP11 PE=1 SV=1	46.73	0.000118511	70.2622	[13] Phospho (ST)	1	GEESQLT*PEKSPK	981	sp|Q9UKA4|AKA11_HUMAN	19896.3	4940.34	13867.5	64.3053	64.3053	64.3053	13867.5	64.3053	0.583243	0	-7.75256	0	1	1.92e-05	0.00386211	1.92e-05	0.00386211
ESLPVSGEESQLTPEKSPK	sp|Q9UKA4|AKA11_HUMAN	Q9UKA4	AKAP11	A-kinase anchor protein 11 OS=Homo sapiens OX=9606 GN=AKAP11 PE=1 SV=1	57.39	0.000154631	74.8863	[17] Phospho (ST)	1	QLTPEKS*PKFPDS	985	sp|Q9UKA4|AKA11_HUMAN	89870.4	113929	77175	117537	35225.2	44580.4	89870.4	44580.4	0.199317	0.685087	-1.01144	0	0	0.234979	0.435354	0.234979	0.435354
KPESPYGNLCDAPDSPRPVK	sp|Q9UKA4|AKA11_HUMAN	Q9UKA4	AKAP11	A-kinase anchor protein 11 OS=Homo sapiens OX=9606 GN=AKAP11 PE=1 SV=1	54.52	0.000144092	66.0649	[15] Phospho (ST)	1	LCDAPDS*PRPVKA	433	sp|Q9UKA4|AKA11_HUMAN	33335.6	37126	29025.6	64.3053	64.3053	3.9457e+06	33335.6	64.3053	0.122217	1.73197	-9.01791	0	0.666667	0.443147	0.621955	0.443147	0.621955
KPESPYGNLCDAPDSPRPVK	sp|Q9UKA4|AKA11_HUMAN	Q9UKA4	AKAP11	A-kinase anchor protein 11 OS=Homo sapiens OX=9606 GN=AKAP11 PE=1 SV=1	20.41	0.00148253	66.1148	[4] Phospho (ST)	1	TPRKPES*PYGNLC	422	sp|Q9UKA4|AKA11_HUMAN	1.1795e+06	979125	931795	421314	293486	586288	979125	421314	0.127651	0.338471	-1.2166	0	0	0.0112602	0.0797793	0.0112602	0.0797793
KPESPYGNLCDAPDSPRPVK	sp|Q9UKA4|AKA11_HUMAN	Q9UKA4	AKAP11	A-kinase anchor protein 11 OS=Homo sapiens OX=9606 GN=AKAP11 PE=1 SV=1	36.71	0.000463779	67.3741	[4] Phospho (ST)|[15] Phospho (ST)	2	TPRKPES*PYGNLC,LCDAPDS*PRPVKA	422433	sp|Q9UKA4|AKA11_HUMAN	257451	337336	324784	81258.8	78776.5	31655.7	324784	78776.5	0.14015	0.437413	-2.04364	0	0	0.00246418	0.0420475	0.00246418	0.0420475
KSFSEDVFQSVK	sp|Q9UKA4|AKA11_HUMAN	Q9UKA4	AKAP11	A-kinase anchor protein 11 OS=Homo sapiens OX=9606 GN=AKAP11 PE=1 SV=1	21.06	0.00137058	84.9729	[2] Phospho (ST)	1	KASVRKS*FSEDVF	18	sp|Q9UKA4|AKA11_HUMAN	37332.5	46364.1	48131.7	36219.8	15940.2	175.858	46364.1	15940.2	0.13182	1.03575	-1.54034	0	0	0.167417	0.35528	0.167417	0.35528
SFSEDVFQSVK	sp|Q9UKA4|AKA11_HUMAN	Q9UKA4	AKAP11	A-kinase anchor protein 11 OS=Homo sapiens OX=9606 GN=AKAP11 PE=1 SV=1	10.33	0.00179494	93.5316	[1] Phospho (ST)	1	KASVRKS*FSEDVF	18	sp|Q9UKA4|AKA11_HUMAN	36822.8	44418.6	36075.1	21124.6	7059.07	251027	36822.8	21124.6	0.11805	1.47174	-0.801672	0	0	0.873335	0.929012	0.873335	0.929012
SLSEEVESSESGELPEVDVK	sp|Q9UKA4|AKA11_HUMAN	Q9UKA4	AKAP11	A-kinase anchor protein 11 OS=Homo sapiens OX=9606 GN=AKAP11 PE=1 SV=1	47.72	0.000121907	93.9685	[3] Phospho (ST)	1	KLMRSLS*EEVESS	1171	sp|Q9UKA4|AKA11_HUMAN	260633	261094	220651	101097	94138.1	72161.8	260633	94138.1	0.0938254	0.169444	-1.46917	0	0	0.00206395	0.0396851	0.00206395	0.0396851
SVSPTFLNPSDENLK	sp|Q9UKA4|AKA11_HUMAN	Q9UKA4	AKAP11	A-kinase anchor protein 11 OS=Homo sapiens OX=9606 GN=AKAP11 PE=1 SV=1	70.3	0.000211954	92.6226	[3] Phospho (ST)	1	QSQRSVS*PTFLNP	1242	sp|Q9UKA4|AKA11_HUMAN	1.73095e+06	1.73957e+06	1.51543e+06	1.63979e+06	792190	1.66982e+06	1.73095e+06	1.63979e+06	0.0764103	0.36442	-0.0780547	0	0	0.390573	0.578809	0.390573	0.578809
VTYAEKLSPLTGQACR	sp|Q9UKA4|AKA11_HUMAN	Q9UKA4	AKAP11	A-kinase anchor protein 11 OS=Homo sapiens OX=9606 GN=AKAP11 PE=1 SV=1	139.55	0	78.9051	[8] Phospho (ST)	1	TYAEKLS*PLTGQA	1580	sp|Q9UKA4|AKA11_HUMAN	875709	882010	769603	366298	277401	271408	875709	277401	0.0749702	0.174206	-1.65848	0	0.166667	0.001881	0.0382642	0.001881	0.0382642
ADSQDAGQETEKEGEEPQASAQDETPITSAK	sp|Q02952|AKA12_HUMAN	Q02952	AKAP12	A-kinase anchor protein 12 OS=Homo sapiens OX=9606 GN=AKAP12 PE=1 SV=4	62.74	0.000176367	59.227	[3] Phospho (ST)	1	HVIKADS*QDAGQE	1587	sp|Q02952|AKA12_HUMAN	1784.27	568.845	1463.23	5163.5	5404.18	17647.7	1463.23	5404.18	0.495119	0.759085	1.88492	0	0.333333	0.00796552	0.0678962	0.00796552	0.0678962
DSEDVSKRDSDKEMATK	sp|Q02952|AKA12_HUMAN	Q02952	AKAP12	A-kinase anchor protein 12 OS=Homo sapiens OX=9606 GN=AKAP12 PE=1 SV=4	15.86	0.00154596	20.4548	[10] Phospho (ST)	1	DVSKRDS*DKEMAT	120	sp|Q02952|AKA12_HUMAN	797.389	138.744	749.291	46318.2	1580.45	2127.8	749.291	2127.8	0.653556	1.53955	1.50577	0	0	0.056019	0.19105	0.056019	0.19105
DSEDVSKRDSDKEMATK	sp|Q02952|AKA12_HUMAN	Q02952	AKAP12	A-kinase anchor protein 12 OS=Homo sapiens OX=9606 GN=AKAP12 PE=1 SV=4	34.93	0.000532812	15.8917	[10] Phospho (ST)|[14] Oxidation (M)	2	DVSKRDS*DKEMAT,RDSDKEM*ATKSAV	120124	sp|Q02952|AKA12_HUMAN	1357.92	437.005	1548.93	1747.1	714.76	12995.9	1357.92	1747.1	0.533413	1.32207	0.363562	0.5	0.333333	0.288669	0.488977	0.288669	0.488977
EDEKGDDVDDPENQNSALADTDASGGLTKESPDTNGPK	sp|Q02952|AKA12_HUMAN	Q02952	AKAP12	A-kinase anchor protein 12 OS=Homo sapiens OX=9606 GN=AKAP12 PE=1 SV=4	81.17	0.000279642	69.7462	[31] Phospho (ST)	1	GGLTKES*PDTNGP	1727	sp|Q02952|AKA12_HUMAN	387.1	128.611	4231.06	128.611	128.611	1.5906e+06	387.1	128.611	1.45208	1.73163	-1.5897	0.666667	0.666667	0.58761	0.737648	0.58761	0.737648
EGVTPWASFKK	sp|Q02952|AKA12_HUMAN	Q02952	AKAP12	A-kinase anchor protein 12 OS=Homo sapiens OX=9606 GN=AKAP12 PE=1 SV=4	28.67	0.000997085	84.4253	[8] Phospho (ST)	1	GVTPWAS*FKKMVT	612	sp|Q02952|AKA12_HUMAN	33785.1	32225	37537.8	10026.4	14135.1	17863.7	33785.1	14135.1	0.0791156	0.279845	-1.25711	0	0	0.0064081	0.0617523	0.0064081	0.0617523
EQSHAEISPPAESGQAVEECKEEGEEK	sp|Q02952|AKA12_HUMAN	Q02952	AKAP12	A-kinase anchor protein 12 OS=Homo sapiens OX=9606 GN=AKAP12 PE=1 SV=4	31.7	0.000740132	58.4469	[8] Phospho (ST)	1	QSHAEIS*PPAESG	253	sp|Q02952|AKA12_HUMAN	65724.4	161834	38539.1	117355	22737.7	11876.7	65724.4	22737.7	0.730321	1.14531	-1.53134	0	0	0.268811	0.472292	0.268811	0.472292
EVSSLEGSPPPCLGQEEAVCTK	sp|Q02952|AKA12_HUMAN	Q02952	AKAP12	A-kinase anchor protein 12 OS=Homo sapiens OX=9606 GN=AKAP12 PE=1 SV=4	96.05	0	84.2286	[3] Phospho (ST)	1	DGAKEVS*SLEGSP	1390	sp|Q02952|AKA12_HUMAN	93967.8	52435	49123.2	235029	77240.1	388126	52435	235029	0.383426	0.665834	2.16423	0	0	0.0562999	0.191584	0.0562999	0.191584
GGGDEESGEHTQVPADSPDSQEEQKGESSASSPEEPEEITCLEK	sp|Q02952|AKA12_HUMAN	Q02952	AKAP12	A-kinase anchor protein 12 OS=Homo sapiens OX=9606 GN=AKAP12 PE=1 SV=4	22.02	0.00139674	78.6448	[32] Phospho (ST)	1	GESSASS*PEEPEE	569	sp|Q02952|AKA12_HUMAN	64.3053	64.3053	64.3053	104.533	134.535	64.3053	64.3053	104.533	0	0.348467	0.700951	1	0.333333	0.150314	0.333428	0.150314	0.333428
GLAEVQQDGEAEEGATSDGEKKR	sp|Q02952|AKA12_HUMAN	Q02952	AKAP12	A-kinase anchor protein 12 OS=Homo sapiens OX=9606 GN=AKAP12 PE=1 SV=4	148.43	0	47.1804	[17] Phospho (ST)	1	AEEGATS*DGEKKR	598	sp|Q02952|AKA12_HUMAN	204975	63789.6	60334.3	24541	11971.8	7768.15	63789.6	11971.8	0.752316	0.591262	-2.41369	0.333333	0.5	0.00697364	0.0640944	0.00697364	0.0640944
KDEGEGAAGAGDHKDPSLGAGEAASK	sp|Q02952|AKA12_HUMAN	Q02952	AKAP12	A-kinase anchor protein 12 OS=Homo sapiens OX=9606 GN=AKAP12 PE=1 SV=4	21.7	0.00138806	34.8857	[17] Phospho (ST)	1	GDHKDPS*LGAGEA	219	sp|Q02952|AKA12_HUMAN	64.3053	56180	36807.6	6217.71	64.3053	64.3053	36807.6	64.3053	0.918921	1.6794	-9.16085	0.333333	0.666667	0.257379	0.460155	0.257379	0.460155
KKTSFR	sp|Q02952|AKA12_HUMAN	Q02952	AKAP12	A-kinase anchor protein 12 OS=Homo sapiens OX=9606 GN=AKAP12 PE=1 SV=4	45.82	0.00011609	13.0813	[4] Phospho (ST)	1	GWRKKTS*FRKPKE	312	sp|Q02952|AKA12_HUMAN	4453.32	11741.3	9108.67	5230.02	1096.24	444513	9108.67	5230.02	0.437548	1.69565	-0.800425	0	0	0.731253	0.840299	0.731253	0.840299
KMVTPK	sp|Q02952|AKA12_HUMAN	Q02952	AKAP12	A-kinase anchor protein 12 OS=Homo sapiens OX=9606 GN=AKAP12 PE=1 SV=4	16.85	0.00151222	12.2247	[2] Oxidation (M)|[4] Phospho (ST)	2	WASFKKM*VTPKKR,SFKKMVT*PKKRVR	616618	sp|Q02952|AKA12_HUMAN	474.92	148.736	439.51	315.904	1209.9	529.034	439.51	529.034	0.505034	0.681726	0.267465	0	0	0.249148	0.450691	0.249148	0.450691
LKETCVSGEDPTQGADLSPDEK	sp|Q02952|AKA12_HUMAN	Q02952	AKAP12	A-kinase anchor protein 12 OS=Homo sapiens OX=9606 GN=AKAP12 PE=1 SV=4	82.89	0.000292141	63.4424	[18] Phospho (ST)	1	TQGADLS*PDEKVL	483	sp|Q02952|AKA12_HUMAN	1992.16	2571.56	752.733	5395.96	3879.41	9.4483e+06	1992.16	5395.96	0.524312	1.7295	1.43755	0.333333	0	0.151982	0.336037	0.151982	0.336037
LTASEQAHPQEPAESAHEPRLSAEYEK	sp|Q02952|AKA12_HUMAN	Q02952	AKAP12	A-kinase anchor protein 12 OS=Homo sapiens OX=9606 GN=AKAP12 PE=1 SV=4	45.73	0.000115848	62.4966	[22] Phospho (ST)	1	AHEPRLS*AEYEKV	371	sp|Q02952|AKA12_HUMAN	24169.8	44078.3	36086.2	23134.4	43148.3	334391	36086.2	43148.3	0.288068	1.30441	0.257857	0	0	0.3562	0.547762	0.3562	0.547762
RPSESDKEDELDK	sp|Q02952|AKA12_HUMAN	Q02952	AKAP12	A-kinase anchor protein 12 OS=Homo sapiens OX=9606 GN=AKAP12 PE=1 SV=4	89.25	0	24.7502	[3] Phospho (ST)	1	KRVRRPS*ESDKED	627	sp|Q02952|AKA12_HUMAN	38028.5	23764.9	38305.2	4212.01	43981.4	20504.1	38028.5	20504.1	0.249237	0.87307	-0.891169	0.333333	0.166667	0.283133	0.487168	0.283133	0.487168
RPSESDKEDELDK	sp|Q02952|AKA12_HUMAN	Q02952	AKAP12	A-kinase anchor protein 12 OS=Homo sapiens OX=9606 GN=AKAP12 PE=1 SV=4	47.29	0.000120366	28.8423	[3] Phospho (ST)|[5] Phospho (ST)	2	KRVRRPS*ESDKED,VRRPSES*DKEDEL	627629	sp|Q02952|AKA12_HUMAN	15035.7	10030.7	11903	132.911	41978.3	15224.4	11903	15224.4	0.205207	1.10883	0.355057	0	0	0.52769	0.690931	0.52769	0.690931
RPSESDKEDELDKVK	sp|Q02952|AKA12_HUMAN	Q02952	AKAP12	A-kinase anchor protein 12 OS=Homo sapiens OX=9606 GN=AKAP12 PE=1 SV=4	24.91	0.00127047	36.7388	[3] Phospho (ST)	1	KRVRRPS*ESDKED	627	sp|Q02952|AKA12_HUMAN	250583	201860	229506	99253.4	77622.3	71901.7	229506	77622.3	0.107493	0.173969	-1.56399	0	0	0.00218065	0.0400783	0.00218065	0.0400783
RPSESDKEDELDKVK	sp|Q02952|AKA12_HUMAN	Q02952	AKAP12	A-kinase anchor protein 12 OS=Homo sapiens OX=9606 GN=AKAP12 PE=1 SV=4	56.81	0.000152416	36.8858	[5] Phospho (ST)	1	VRRPSES*DKEDEL	629	sp|Q02952|AKA12_HUMAN	47393.6	109881	165946	102622	92218.8	37135.4	109881	92218.8	0.550444	0.455117	-0.252814	0	0	0.526977	0.690452	0.526977	0.690452
SAESPTSPVTSETGSTFK	sp|Q02952|AKA12_HUMAN	Q02952	AKAP12	A-kinase anchor protein 12 OS=Homo sapiens OX=9606 GN=AKAP12 PE=1 SV=4	67.31	0.000196002	71.3385	[7] Phospho (ST)	1	SAESPTS*PVTSET	286	sp|Q02952|AKA12_HUMAN	175370	106910	144706	220716	88725.7	206478	144706	206478	0.240932	0.421258	0.512866	0	0	0.693576	0.814545	0.693576	0.814545
SAESPTSPVTSETGSTFKK	sp|Q02952|AKA12_HUMAN	Q02952	AKAP12	A-kinase anchor protein 12 OS=Homo sapiens OX=9606 GN=AKAP12 PE=1 SV=4	69.99	0.000210128	61.9426	[7] Phospho (ST)	1	SAESPTS*PVTSET	286	sp|Q02952|AKA12_HUMAN	66729.5	67068.8	59733.3	354357	563702	177037	66729.5	354357	0.064186	0.530236	2.40881	0	0	0.00314086	0.0467391	0.00314086	0.0467391
SATLSSTESTASEMQEEMK	sp|Q02952|AKA12_HUMAN	Q02952	AKAP12	A-kinase anchor protein 12 OS=Homo sapiens OX=9606 GN=AKAP12 PE=1 SV=4	68.63	0.000202881	87.5378	[5] Phospho (ST)|[6] Phospho (ST)	2	VKSATLS*STESTA,KSATLSS*TESTAS	644645	sp|Q02952|AKA12_HUMAN	64.3053	64.3053	64.3053	8400.1	623.335	64.3053	64.3053	623.335	0	1.53823	3.277	1	0.333333	0.0979859	0.25967	0.0979859	0.25967
SPPSPVER	sp|Q02952|AKA12_HUMAN	Q02952	AKAP12	A-kinase anchor protein 12 OS=Homo sapiens OX=9606 GN=AKAP12 PE=1 SV=4	39.74	0.00050015	30.1143	[4] Phospho (ST)	1	HAKSPPS*PVEREM	1331	sp|Q02952|AKA12_HUMAN	2143.52	7910.4	13433.9	3099.14	1048.06	87132.3	7910.4	3099.14	0.72109	1.61436	-1.35188	0	0	0.954973	0.9768	0.954973	0.9768
VELPSEEQVSGSQGPSEEKPAPLATEVFDEK	sp|Q02952|AKA12_HUMAN	Q02952	AKAP12	A-kinase anchor protein 12 OS=Homo sapiens OX=9606 GN=AKAP12 PE=1 SV=4	50.38	0.000130225	94.6028	[5] Phospho (ST)	1	EKVELPS*EEQVSG	381	sp|Q02952|AKA12_HUMAN	16917.7	23873.7	14013.7	24297.7	30946.4	181796	16917.7	30946.4	0.277357	1.12733	0.871239	0	0	0.118191	0.289479	0.118191	0.289479
VQGSPLKK	sp|Q02952|AKA12_HUMAN	Q02952	AKAP12	A-kinase anchor protein 12 OS=Homo sapiens OX=9606 GN=AKAP12 PE=1 SV=4	19.51	0.00152439	19.815	[4] Phospho (ST)	1	RMKVQGS*PLKKLF	514	sp|Q02952|AKA12_HUMAN	1071.62	443.254	1378.34	67.4311	2546.92	5503.46	1071.62	2546.92	0.494268	1.00575	1.24896	0	0	0.921953	0.957736	0.921953	0.957736
VRRPSESDKEDELDK	sp|Q02952|AKA12_HUMAN	Q02952	AKAP12	A-kinase anchor protein 12 OS=Homo sapiens OX=9606 GN=AKAP12 PE=1 SV=4	14.87	0.00175644	30.8074	[5] Phospho (ST)|[7] Phospho (ST)	2	KRVRRPS*ESDKED,VRRPSES*DKEDEL	627629	sp|Q02952|AKA12_HUMAN	11661.8	5823.45	5983.88	209394	5136.45	64214.6	5983.88	64214.6	0.425082	1.13125	3.42375	0	0	0.127623	0.302571	0.127623	0.302571
ALQLSNSPGASSAFLK	sp|Q12802|AKP13_HUMAN	Q12802	AKAP13	A-kinase anchor protein 13 OS=Homo sapiens OX=9606 GN=AKAP13 PE=1 SV=2	91.66	0	93.7708	[7] Phospho (ST)	1	ALQLSNS*PGASSA	983	sp|Q12802|AKP13_HUMAN	352249	302323	348919	420357	197773	321966	348919	321966	0.0834481	0.355945	-0.115983	0	0	0.679467	0.804772	0.679467	0.804772
DEDEGIPSENEEEKK	sp|Q12802|AKP13_HUMAN	Q12802	AKAP13	A-kinase anchor protein 13 OS=Homo sapiens OX=9606 GN=AKAP13 PE=1 SV=2	21.61	0.00138495	38.1006	[8] Phospho (ST)	1	EDEGIPS*ENEEEK	2345	sp|Q12802|AKP13_HUMAN	200300	211195	158343	145172	104833	131096	200300	131096	0.146914	0.161171	-0.611541	0	0	0.0892447	0.246966	0.0892447	0.246966
DMAECSTPLPEDCSPTHSPR	sp|Q12802|AKP13_HUMAN	Q12802	AKAP13	A-kinase anchor protein 13 OS=Homo sapiens OX=9606 GN=AKAP13 PE=1 SV=2	31.72	0.000740497	68.324	[16] Phospho (ST)	1	PEDCSPT*HSPRVL	2400	sp|Q12802|AKP13_HUMAN	303271	363613	395711	281922	140942	71578.6	363613	140942	0.132506	0.650336	-1.3673	0	0	0.0555545	0.190192	0.0555545	0.190192
DMAECSTPLPEDCSPTHSPR	sp|Q12802|AKP13_HUMAN	Q12802	AKAP13	A-kinase anchor protein 13 OS=Homo sapiens OX=9606 GN=AKAP13 PE=1 SV=2	64.5	0.000185219	53.1317	[2] Oxidation (M)|[7] Phospho (ST)	2	EMIFRDM*AECSTP,DMAECST*PLPEDC	23862391	sp|Q12802|AKP13_HUMAN	857.783	128.611	803.853	2616.85	128.611	42551	803.853	2616.85	0.680882	1.57673	1.70283	0.666667	0.5	0.310062	0.505754	0.310062	0.505754
DRQSLDGFYSHGMGAEGR	sp|Q12802|AKP13_HUMAN	Q12802	AKAP13	A-kinase anchor protein 13 OS=Homo sapiens OX=9606 GN=AKAP13 PE=1 SV=2	27.07	0.00103428	74.4418	[4] Phospho (ST)	1	RSRDRQS*LDGFYS	1507	sp|Q12802|AKP13_HUMAN	101619	113644	127978	16754.7	13020.9	10581.7	113644	13020.9	0.115338	0.231112	-3.12562	0	0	6.87e-05	0.00792731	6.87e-05	0.00792731
ENALSSGTLQEEQRTPPPGQDTQQFHEK	sp|Q12802|AKP13_HUMAN	Q12802	AKAP13	A-kinase anchor protein 13 OS=Homo sapiens OX=9606 GN=AKAP13 PE=1 SV=2	37.26	0.000470411	66.6937	[5] Phospho (ST)	1	IKENALS*SGTLQE	943	sp|Q12802|AKP13_HUMAN	459901	461825	414456	840527	535312	1.61773e+06	459901	840527	0.0601946	0.559296	0.869972	0	0	0.0717636	0.218269	0.0717636	0.218269
FLSHSTDSLNK	sp|Q12802|AKP13_HUMAN	Q12802	AKAP13	A-kinase anchor protein 13 OS=Homo sapiens OX=9606 GN=AKAP13 PE=1 SV=2	37.46	0.000472679	50.327	[5] Phospho (ST)	1	WKFLSHS*TDSLNK	1929	sp|Q12802|AKP13_HUMAN	644879	924334	982097	456480	201982	547313	924334	456480	0.212063	0.445388	-1.01786	0	0	0.048655	0.176806	0.048655	0.176806
GKSSPICSTTGDDKLCADSACQQNTVTSSGDLVAK	sp|Q12802|AKP13_HUMAN	Q12802	AKAP13	A-kinase anchor protein 13 OS=Homo sapiens OX=9606 GN=AKAP13 PE=1 SV=2	86.47	0	74.6517	[4] Phospho (ST)	1	SQKGKSS*PICSTT	650	sp|Q12802|AKP13_HUMAN	1.32665e+06	1.36962e+06	1.19011e+06	1.03835e+06	1.21329e+06	2.00128e+06	1.32665e+06	1.21329e+06	0.0723562	0.361841	-0.128863	0	0	0.836091	0.907682	0.836091	0.907682
IPSFFPSPEEPPSPSAPSIAK	sp|Q12802|AKP13_HUMAN	Q12802	AKAP13	A-kinase anchor protein 13 OS=Homo sapiens OX=9606 GN=AKAP13 PE=1 SV=2	34.27	0.000523423	98.9656	[13] Phospho (ST)	1	SPEEPPS*PSAPSI	2709	sp|Q12802|AKP13_HUMAN	61396.5	68664.2	59091.1	95888.8	83474.6	6220.12	61396.5	83474.6	0.0792429	0.785383	0.44318	0	0	0.513724	0.679338	0.513724	0.679338
KGEEVEPAPIVDSGTVSDQDSCLQSLPDCGVK	sp|Q12802|AKP13_HUMAN	Q12802	AKAP13	A-kinase anchor protein 13 OS=Homo sapiens OX=9606 GN=AKAP13 PE=1 SV=2	77.47	0.000255428	92.2618	[17] Phospho (ST)	1	VDSGTVS*DQDSCL	395	sp|Q12802|AKP13_HUMAN	272672	286879	273507	119669	65898.5	8290.42	273507	65898.5	0.0287099	0.861975	-2.05326	0	0	0.0359295	0.149035	0.0359295	0.149035
RHSWGPGK	sp|Q12802|AKP13_HUMAN	Q12802	AKAP13	A-kinase anchor protein 13 OS=Homo sapiens OX=9606 GN=AKAP13 PE=1 SV=2	30.8	0.000884315	20.6823	[3] Phospho (ST)	1	SPFRRHS*WGPGKN	1565	sp|Q12802|AKP13_HUMAN	429650	694900	682308	122340	342730	499569	682308	342730	0.248453	0.589353	-0.993349	0	0	0.119397	0.291092	0.119397	0.291092
RTESDSGLKK	sp|Q12802|AKP13_HUMAN	Q12802	AKAP13	A-kinase anchor protein 13 OS=Homo sapiens OX=9606 GN=AKAP13 PE=1 SV=2	46.3	0.000117288	14.2101	[4] Phospho (ST)	1	DLRRTES*DSGLKK	2498	sp|Q12802|AKP13_HUMAN	34206.7	54192.4	37016.1	1467.25	6167.67	29670.9	37016.1	6167.67	0.258804	1.21512	-2.58536	0	0.333333	0.0542268	0.187851	0.0542268	0.187851
SFSLEGLTGGAGVGNKPSSSLEVSSANAEELR	sp|Q12802|AKP13_HUMAN	Q12802	AKAP13	A-kinase anchor protein 13 OS=Homo sapiens OX=9606 GN=AKAP13 PE=1 SV=2	77.53	0.00025582	96.2438	[3] Phospho (ST)	1	IHRRSFS*LEGLTG	1602	sp|Q12802|AKP13_HUMAN	753560	778747	725761	532772	354190	1.40327e+06	753560	532772	0.0352122	0.735231	-0.500205	0	0	0.693664	0.814545	0.693664	0.814545
SGSLDSELSVSPK	sp|Q12802|AKP13_HUMAN	Q12802	AKAP13	A-kinase anchor protein 13 OS=Homo sapiens OX=9606 GN=AKAP13 PE=1 SV=2	62.74	0.000176367	76.5543	[11] Phospho (ST)	1	DSELSVS*PKRNSI	2728	sp|Q12802|AKP13_HUMAN	475095	441635	419566	391818	274432	458424	441635	391818	0.0627672	0.248489	-0.172672	0	0	0.394024	0.581823	0.394024	0.581823
SGSLDSELSVSPKR	sp|Q12802|AKP13_HUMAN	Q12802	AKAP13	A-kinase anchor protein 13 OS=Homo sapiens OX=9606 GN=AKAP13 PE=1 SV=2	74.99	0.000239177	66.8743	[11] Phospho (ST)	1	DSELSVS*PKRNSI	2728	sp|Q12802|AKP13_HUMAN	206118	254502	277579	169539	127356	169184	254502	169184	0.148211	0.156106	-0.589081	0	0.166667	0.0601497	0.198397	0.0601497	0.198397
SLSPFR	sp|Q12802|AKP13_HUMAN	Q12802	AKAP13	A-kinase anchor protein 13 OS=Homo sapiens OX=9606 GN=AKAP13 PE=1 SV=2	39.55	0.000497216	68.3907	[3] Phospho (ST)	1	SSMRSLS*PFRRHS	1559	sp|Q12802|AKP13_HUMAN	145393	174050	199027	113206	76190.9	455591	174050	113206	0.155292	0.972957	-0.620547	0	0.333333	0.87247	0.928427	0.87247	0.928427
SLSPFRR	sp|Q12802|AKP13_HUMAN	Q12802	AKAP13	A-kinase anchor protein 13 OS=Homo sapiens OX=9606 GN=AKAP13 PE=1 SV=2	14.63	0.00174795	55.49	[3] Phospho (ST)	1	SSMRSLS*PFRRHS	1559	sp|Q12802|AKP13_HUMAN	423909	502747	385695	248053	196274	283467	423909	248053	0.136449	0.18076	-0.773103	0	0	0.0257681	0.123296	0.0257681	0.123296
SLSRPSSLIEQEK	sp|Q12802|AKP13_HUMAN	Q12802	AKAP13	A-kinase anchor protein 13 OS=Homo sapiens OX=9606 GN=AKAP13 PE=1 SV=2	42.68	0.000215239	74.8863	[3] Phospho (ST)	1	ALTRSLS*RPSSLI	2563	sp|Q12802|AKP13_HUMAN	190087	189008	223709	159707	73534	107169	190087	107169	0.0981948	0.38275	-0.826775	0	0	0.0537777	0.186997	0.0537777	0.186997
HAYKDDSPR	sp|Q02040|AK17A_HUMAN	Q02040	AKAP17A	A-kinase anchor protein 17A OS=Homo sapiens OX=9606 GN=AKAP17A PE=1 SV=2	53.52	0.00014039	13.229	[7] Phospho (ST)	1	HAYKDDS*PRRRST	633	sp|Q02040|AK17A_HUMAN	20046.1	17681	32413.1	288.388	4722.19	7632.92	20046.1	4722.19	0.338395	0.877564	-2.08579	0	0.333333	0.0423169	0.162739	0.0423169	0.162739
VVPEDGSPEKR	sp|Q02040|AK17A_HUMAN	Q02040	AKAP17A	A-kinase anchor protein 17A OS=Homo sapiens OX=9606 GN=AKAP17A PE=1 SV=2	66.99	0.000194628	25.73	[7] Phospho (ST)	1	VVPEDGS*PEKRCP	537	sp|Q02040|AK17A_HUMAN	4.45164e+06	5.48561e+06	3.87703e+06	3.02719e+06	2.07452e+06	8.58484e+06	4.45164e+06	3.02719e+06	0.177023	0.770715	-0.556357	0	0	0.659081	0.790974	0.659081	0.790974
DALGDSLQVPVSPSSTTSSR	sp|Q9Y2D5|AKAP2_HUMAN	Q9Y2D5	AKAP2	A-kinase anchor protein 2 OS=Homo sapiens OX=9606 GN=AKAP2 PE=1 SV=3	108.01	0	89.9296	[12] Phospho (ST)	1	SLQVPVS*PSSTTS	152	sp|Q9Y2D5|AKAP2_HUMAN	1.0588e+06	564406	516502	1.61349e+06	1.92126e+06	2.86938e+06	564406	1.92126e+06	0.420935	0.30664	1.76725	0	0	0.00941494	0.0727325	0.00941494	0.0727325
DGAEQQGPEATVEEAEAAAFGSEKPQSMFEPPQVSSPVQEK	sp|Q9Y2D5|AKAP2_HUMAN	Q9Y2D5	AKAP2	A-kinase anchor protein 2 OS=Homo sapiens OX=9606 GN=AKAP2 PE=1 SV=3	28.49	0.00106952	96.966	[28] Oxidation (M)|[36] Phospho (ST)	2	SEKPQSM*FEPPQV,EPPQVSS*PVQEKR	623631	sp|Q9Y2D5|AKAP2_HUMAN	159271	75009.3	96316.5	100570	117032	554129	96316.5	117032	0.397578	0.999993	0.28105	0	0	0.314357	0.509878	0.314357	0.509878
DGAEQQGPEATVEEAEAAAFGSEKPQSMFEPPQVSSPVQEK	sp|Q9Y2D5|AKAP2_HUMAN	Q9Y2D5	AKAP2	A-kinase anchor protein 2 OS=Homo sapiens OX=9606 GN=AKAP2 PE=1 SV=3	57.98	0.000156863	98.1723	[36] Phospho (ST)	1	EPPQVSS*PVQEKR	631	sp|Q9Y2D5|AKAP2_HUMAN	152069	162916	127090	291714	143259	286499	152069	286499	0.124673	0.350307	0.913801	0	0	0.145792	0.327807	0.145792	0.327807
GQKSPGALETPSAAGSQGNTASQGK	sp|Q9Y2D5|AKAP2_HUMAN	Q9Y2D5	AKAP2	A-kinase anchor protein 2 OS=Homo sapiens OX=9606 GN=AKAP2 PE=1 SV=3	106.26	0	46.1249	[4] Phospho (ST)	1	AAKGQKS*PGALET	393	sp|Q9Y2D5|AKAP2_HUMAN	64.3053	3160.79	2563.68	65.8781	64.3053	5256.03	2563.68	65.8781	0.851343	1.66926	-5.28227	0.333333	0.333333	0.547642	0.706486	0.547642	0.706486
QAPPHIELSNSSPDPMAEAER	sp|Q9Y2D5|AKAP2_HUMAN	Q9Y2D5	AKAP2	A-kinase anchor protein 2 OS=Homo sapiens OX=9606 GN=AKAP2 PE=1 SV=3	32.03	0.000746145	85.5425	[12] Phospho (ST)	1	IELSNSS*PDPMAE	121	sp|Q9Y2D5|AKAP2_HUMAN	48100	39886.2	41909.8	128311	61230.3	151839	41909.8	128311	0.098835	0.413174	1.61429	0	0	0.0231999	0.116006	0.0231999	0.116006
QAPPHIELSNSSPDPMAEAER	sp|Q9Y2D5|AKAP2_HUMAN	Q9Y2D5	AKAP2	A-kinase anchor protein 2 OS=Homo sapiens OX=9606 GN=AKAP2 PE=1 SV=3	27.33	0.00104066	74.2734	[12] Phospho (ST)|[16] Oxidation (M)	2	IELSNSS*PDPMAE,NSSPDPM*AEAERT	121125	sp|Q9Y2D5|AKAP2_HUMAN	217720	198088	194338	257766	243977	325451	198088	257766	0.061746	0.158149	0.379921	0	0	0.155631	0.340893	0.155631	0.340893
QVLQSTQSPR	sp|Q9Y2D5|AKAP2_HUMAN	Q9Y2D5	AKAP2	A-kinase anchor protein 2 OS=Homo sapiens OX=9606 GN=AKAP2 PE=1 SV=3	45.53	0.00011542	34.2786	[8] Phospho (ST)	1	VLQSTQS*PRTKNA	748	sp|Q9Y2D5|AKAP2_HUMAN	45972.2	129447	60178.3	15148.2	77092.2	15966.1	60178.3	15966.1	0.568703	0.98505	-1.91423	0	0	0.125031	0.298866	0.125031	0.298866
SPGALETPSAAGSQGNTASQGK	sp|Q9Y2D5|AKAP2_HUMAN	Q9Y2D5	AKAP2	A-kinase anchor protein 2 OS=Homo sapiens OX=9606 GN=AKAP2 PE=1 SV=3	187.03	0	53.1875	[1] Phospho (ST)	1	AAKGQKS*PGALET	393	sp|Q9Y2D5|AKAP2_HUMAN	30650.6	12145.9	21403.7	81903.6	263097	98024	21403.7	98024	0.432351	0.679079	2.19528	0.166667	0	0.00495464	0.0557944	0.00495464	0.0557944
SVNVSLTQEELDSGLDELSVR	sp|Q9Y2D5|AKAP2_HUMAN	Q9Y2D5	AKAP2	A-kinase anchor protein 2 OS=Homo sapiens OX=9606 GN=AKAP2 PE=1 SV=3	112.42	0	98.7677	[5] Phospho (ST)	1	SRSVNVS*LTQEEL	465	sp|Q9Y2D5|AKAP2_HUMAN	20528.4	78779	67325.4	120437	95660.5	54500.5	67325.4	95660.5	0.555604	0.369248	0.506773	0	0	0.237179	0.437832	0.237179	0.437832
TLSMIEEEIR	sp|Q9Y2D5|AKAP2_HUMAN	Q9Y2D5	AKAP2	A-kinase anchor protein 2 OS=Homo sapiens OX=9606 GN=AKAP2 PE=1 SV=3	54.16	0.000142592	97.346	[3] Phospho (ST)	1	RKQRTLS*MIEEEI	720	sp|Q9Y2D5|AKAP2_HUMAN	64.3053	3007.28	64.3053	64.3053	25320.8	935.908	64.3053	935.908	1.6255	1.63408	3.86336	0.666667	0.333333	0.416009	0.600943	0.416009	0.600943
VKPPPSPTTEGPSLQPDLAPEEAAGTQRPK	sp|Q9Y2D5|AKAP2_HUMAN	Q9Y2D5	AKAP2	A-kinase anchor protein 2 OS=Homo sapiens OX=9606 GN=AKAP2 PE=1 SV=3	18.8	0.00156592	83.2139	[9] Phospho (ST)	1	PPPSPTT*EGPSLQ	781	sp|Q9Y2D5|AKAP2_HUMAN	845092	758980	788239	1.44073e+06	2.36124e+06	2.30542e+06	788239	2.30542e+06	0.0549095	0.253514	1.54832	0	0	0.00610891	0.0611052	0.00610891	0.0611052
YLDEVLEANCCDSAVDGTYNGTSSPEPGAVVLVGGLSPPVHEATQPEPTER	sp|Q9Y2D5|AKAP2_HUMAN	Q9Y2D5	AKAP2	A-kinase anchor protein 2 OS=Homo sapiens OX=9606 GN=AKAP2 PE=1 SV=3	21.36	0.00137841	98.3202	[24] Phospho (ST)	1	TYNGTSS*PEPGAV	78	sp|Q9Y2D5|AKAP2_HUMAN	116705	143012	216745	160417	165159	285744	143012	165159	0.326529	0.348567	0.207718	0	0	0.406779	0.593347	0.406779	0.593347
AKSTQDLSEGISR	sp|P24588|AKAP5_HUMAN	P24588	AKAP5	A-kinase anchor protein 5 OS=Homo sapiens OX=9606 GN=AKAP5 PE=1 SV=3	72.91	0.000226706	43.8913	[3] Phospho (ST)	1	QATKAKS*TQDLSE	178	sp|P24588|AKAP5_HUMAN	31100.6	49920.3	28625.1	5699.18	21364.2	4375.63	31100.6	5699.18	0.318647	0.901696	-2.44812	0	0	0.0218492	0.112689	0.0218492	0.112689
STQDLSEGISR	sp|P24588|AKAP5_HUMAN	P24588	AKAP5	A-kinase anchor protein 5 OS=Homo sapiens OX=9606 GN=AKAP5 PE=1 SV=3	36.81	0.000464987	52.6882	[1] Phospho (ST)	1	QATKAKS*TQDLSE	178	sp|P24588|AKAP5_HUMAN	64.3053	64.3053	5738.51	64.3053	64.3053	2051.61	64.3053	64.3053	1.6751	1.57879	0	0.666667	0.666667	0.838486	0.908924	0.838486	0.908924
AVDGEGAPAPESSGEPAEDEGPTDTAEAGSDPQAEQLLEEQVPCGTAHEK	sp|O43823|AKAP8_HUMAN	O43823	AKAP8	A-kinase anchor protein 8 OS=Homo sapiens OX=9606 GN=AKAP8 PE=1 SV=1	47.54	0.000121256	90.647	[13] Phospho (ST)	1	APAPESS*GEPAED	600	sp|O43823|AKAP8_HUMAN	540432	520395	587977	1.47287e+06	1.00685e+06	75278.2	540432	1.00685e+06	0.0631578	0.835541	0.897665	0	0	0.876736	0.931129	0.876736	0.931129
SGDEEFKGEDELCDSGR	sp|O43823|AKAP8_HUMAN	O43823	AKAP8	A-kinase anchor protein 8 OS=Homo sapiens OX=9606 GN=AKAP8 PE=1 SV=1	161.89	0	63.3527	[1] Phospho (ST)	1	AAGDFRS*GDEEFK	339	sp|O43823|AKAP8_HUMAN	770013	671000	581348	1.68978e+06	1.74182e+06	3.26633e+06	671000	1.74182e+06	0.139991	0.40113	1.37621	0	0	0.00456644	0.0540969	0.00456644	0.0540969
VDSEGDFSENDDAAGDFRSGDEEFKGEDELCDSGR	sp|O43823|AKAP8_HUMAN	O43823	AKAP8	A-kinase anchor protein 8 OS=Homo sapiens OX=9606 GN=AKAP8 PE=1 SV=1	66.51	0.000192827	85.8406	[3] Phospho (ST)|[19] Phospho (ST)	2	KLARVDS*EGDFSE,AAGDFRS*GDEEFK	323339	sp|O43823|AKAP8_HUMAN	1.96894e+06	1.90631e+06	1.86036e+06	2.02427e+06	4.90394e+06	1.1052e+06	1.90631e+06	2.02427e+06	0.0285091	0.740124	0.0866186	0	0	0.720659	0.833709	0.720659	0.833709
TLDFDPLLSPASPK	sp|Q53H80|AKIR2_HUMAN	Q53H80	AKIRIN2	Akirin-2 OS=Homo sapiens OX=9606 GN=AKIRIN2 PE=1 SV=2	60.88	0.000168294	99.5473	[12] Phospho (ST)	1	PLLSPAS*PKRRRC	21	sp|Q53H80|AKIR2_HUMAN	152220	118703	143875	181596	176376	237545	143875	181596	0.126193	0.170823	0.335925	0	0	0.115323	0.285273	0.115323	0.285273
SGSPSDNSGAEEMEVSLAKPK	sp|P31749|AKT1_HUMAN	P31749	AKT1	RAC-alpha serine/threonine-protein kinase OS=Homo sapiens OX=9606 GN=AKT1 PE=1 SV=2	217.58	0	76.7664	[3] Phospho (ST)	1	MDFRSGS*PSDNSG	124	sp|P31749|AKT1_HUMAN	1.88923e+06	1.73082e+06	1.73387e+06	1.46819e+06	697375	1.04155e+06	1.73387e+06	1.04155e+06	0.0507609	0.361203	-0.735267	0	0	0.0466634	0.208795	0.0666634	0.208795
SGSPSDNSGAEEMEVSLAKPK	sp|P31749|AKT1_HUMAN	P31749	AKT1	RAC-alpha serine/threonine-protein kinase OS=Homo sapiens OX=9606 GN=AKT1 PE=1 SV=2	81.6	0.000283527	58.3979	[3] Phospho (ST)|[13] Oxidation (M)	2	MDFRSGS*PSDNSG,NSGAEEM*EVSLAK	124134	sp|P31749|AKT1_HUMAN	243315	92451.9	93013.8	60532.4	65180.4	51665.2	93013.8	60532.4	0.608276	0.116133	-0.619736	0	0	0.0454527	0.189961	0.0554527	0.189961
SGSPSDNSGAEEMEVSLAKPK	sp|P31749|AKT1_HUMAN	P31749	AKT1	RAC-alpha serine/threonine-protein kinase OS=Homo sapiens OX=9606 GN=AKT1 PE=1 SV=2	43.14	0.000217746	79.782	[3] Phospho (ST)|[8] Phospho (ST)	2	MDFRSGS*PSDNSG,GSPSDNS*GAEEME	124129	sp|P31749|AKT1_HUMAN	232717	291543	342974	241649	108191	110745	291543	110745	0.190848	0.49714	-1.39646	0	0	0.0478574	0.194342	0.0578574	0.194342
SGSPSDNSGAEEMEVSLAKPK	sp|P31749|AKT1_HUMAN	P31749	AKT1	RAC-alpha serine/threonine-protein kinase OS=Homo sapiens OX=9606 GN=AKT1 PE=1 SV=2	25.14	0.00127632	76.0926	[5] Phospho (ST)	1	FRSGSPS*DNSGAE	126	sp|P31749|AKT1_HUMAN	89872.5	113191	114191	131838	56596.4	392857	113191	131838	0.130123	0.910779	0.220016	0	0	0.565502	0.720617	0.565502	0.720617
AATAARPPAPPPAPQPPSPTPSPPRPTLAR	sp|Q96B36|AKTS1_HUMAN	Q96B36	AKT1S1	Proline-rich AKT1 substrate 1 OS=Homo sapiens OX=9606 GN=AKT1S1 PE=1 SV=1	22.77	0.00141691	83.4022	[18] Phospho (ST)	1	PAPQPPS*PTPSPP	88	sp|Q96B36|AKTS1_HUMAN	3.86741e+06	3.00661e+06	3.37523e+06	6.16917e+06	1.04209e+07	7.26038e+06	3.37523e+06	7.26038e+06	0.126412	0.277754	1.10506	0	0	0.0103106	0.0758753	0.0103106	0.0758753
AATAARPPAPPPAPQPPSPTPSPPRPTLAR	sp|Q96B36|AKTS1_HUMAN	Q96B36	AKT1S1	Proline-rich AKT1 substrate 1 OS=Homo sapiens OX=9606 GN=AKT1S1 PE=1 SV=1	16.51	0.00150295	85.6815	[18] Phospho (ST)|[22] Phospho (ST)	2	PAPQPPS*PTPSPP,PPSPTPS*PPRPTL	88,92	sp|Q96B36|AKTS1_HUMAN	1.91555e+07	1.58149e+07	2.04823e+07	3.49326e+07	4.08616e+07	7.48446e+07	1.91555e+07	4.08616e+07	0.130113	0.428907	1.09299	0	0	0.0127429	0.0844871	0.0127429	0.0844871
AATAARPPAPPPAPQPPSPTPSPPRPTLAR	sp|Q96B36|AKTS1_HUMAN	Q96B36	AKT1S1	Proline-rich AKT1 substrate 1 OS=Homo sapiens OX=9606 GN=AKT1S1 PE=1 SV=1	10.69	0.00180505	84.9233	[20] Phospho (ST)	1	PQPPSPT*PSPPRP	90	sp|Q96B36|AKTS1_HUMAN	137849	96554.6	130092	549389	910779	438808	130092	549389	0.180641	0.389961	2.0783	0	0	0.00107826	0.0291177	0.00107826	0.0291177
LNTSDFQK	sp|Q96B36|AKTS1_HUMAN	Q96B36	AKT1S1	Proline-rich AKT1 substrate 1 OS=Homo sapiens OX=9606 GN=AKT1S1 PE=1 SV=1	41.01	0.000309087	40.5986	[3] Phospho (ST)	1	PRPRLNT*SDFQKL	246	sp|Q96B36|AKTS1_HUMAN	157744	224076	256729	162455	121267	93365.7	224076	121267	0.236966	0.276516	-0.885807	0	0	0.0757029	0.224847	0.0757029	0.224847
RTEARSSDEENGPPSSPDLDR	sp|Q96B36|AKTS1_HUMAN	Q96B36	AKT1S1	Proline-rich AKT1 substrate 1 OS=Homo sapiens OX=9606 GN=AKT1S1 PE=1 SV=1	28.94	0.0010027	46.8118	[6] Phospho (ST)|[15] Phospho (ST)|[16] Phospho (ST)	3	KRTEARS*SDEENG,EENGPPS*SPDLDR,ENGPPSS*PDLDRI	202211212	sp|Q96B36|AKTS1_HUMAN	98855.9	30375.5	39223.7	33549.4	101597	4050.01	39223.7	33549.4	0.663321	1.07819	-0.225439	0	0	0.444784	0.622984	0.444784	0.622984
SLPVSVPVWGFK	sp|Q96B36|AKTS1_HUMAN	Q96B36	AKT1S1	Proline-rich AKT1 substrate 1 OS=Homo sapiens OX=9606 GN=AKT1S1 PE=1 SV=1	47.96	0.000122534	100.923	[1] Phospho (ST)	1	TQQYAKS*LPVSVP	183	sp|Q96B36|AKTS1_HUMAN	3325.46	1665.17	64.3053	7858.58	64.3053	18143.4	1665.17	7858.58	0.967768	1.04366	2.2386	0.333333	0.333333	0.57388	0.726584	0.57388	0.726584
SSDEENGPPSSPDLDR	sp|Q96B36|AKTS1_HUMAN	Q96B36	AKT1S1	Proline-rich AKT1 substrate 1 OS=Homo sapiens OX=9606 GN=AKT1S1 PE=1 SV=1	87.04	0	48.8765	[11] Phospho (ST)	1	ENGPPSS*PDLDRI	212	sp|Q96B36|AKTS1_HUMAN	1.95771e+06	1.95534e+06	1.55622e+06	1.54101e+06	2.11229e+06	2.29186e+06	1.95534e+06	2.11229e+06	0.126774	0.197851	0.111393	0	0	0.725019	0.836518	0.725019	0.836518
SSDEENGPPSSPDLDR	sp|Q96B36|AKTS1_HUMAN	Q96B36	AKT1S1	Proline-rich AKT1 substrate 1 OS=Homo sapiens OX=9606 GN=AKT1S1 PE=1 SV=1	108.44	0	53.2691	[2] Phospho (ST)	1	RTEARSS*DEENGP	203	sp|Q96B36|AKTS1_HUMAN	468658	515481	591022	1.8356e+06	1.69302e+06	827479	515481	1.69302e+06	0.11759	0.375719	1.71561	0	0	0.0142323	0.0897591	0.0142323	0.0897591
SSDEENGPPSSPDLDR	sp|Q96B36|AKTS1_HUMAN	Q96B36	AKT1S1	Proline-rich AKT1 substrate 1 OS=Homo sapiens OX=9606 GN=AKT1S1 PE=1 SV=1	50.01	0.000129082	51.8237	[2] Phospho (ST)|[11] Phospho (ST)	2	RTEARSS*DEENGP,ENGPPSS*PDLDRI	203212	sp|Q96B36|AKTS1_HUMAN	1.58151e+06	1.79951e+06	1.76785e+06	3.7114e+06	3.58814e+06	8.27574e+06	1.76785e+06	3.7114e+06	0.0686317	0.514568	1.06997	0	0	0.0125426	0.0839248	0.0125426	0.0839248
TEARSSDEENGPPSSPDLDR	sp|Q96B36|AKTS1_HUMAN	Q96B36	AKT1S1	Proline-rich AKT1 substrate 1 OS=Homo sapiens OX=9606 GN=AKT1S1 PE=1 SV=1	90.1	0	52.3026	[5] Phospho (ST)|[6] Phospho (ST)	2	KRTEARS*SDEENG,RTEARSS*DEENGP	202203	sp|Q96B36|AKTS1_HUMAN	211831	174534	230345	597940	645739	480034	211831	597940	0.138286	0.148438	1.49708	0	0	0.00217913	0.0400783	0.00217913	0.0400783
TEARSSDEENGPPSSPDLDR	sp|Q96B36|AKTS1_HUMAN	Q96B36	AKT1S1	Proline-rich AKT1 substrate 1 OS=Homo sapiens OX=9606 GN=AKT1S1 PE=1 SV=1	62.9	0.000177368	49.9207	[5] Phospho (ST)|[6] Phospho (ST)|[15] Phospho (ST)	3	KRTEARS*SDEENG,RTEARSS*DEENGP,ENGPPSS*PDLDRI	202203212	sp|Q96B36|AKTS1_HUMAN	2.20287e+06	2.0616e+06	2.32338e+06	1.22761e+06	5.89777e+06	278644	2.20287e+06	1.22761e+06	0.0596687	1.21876	-0.843525	0	0	0.498801	0.667586	0.498801	0.667586
TEARSSDEENGPPSSPDLDR	sp|Q96B36|AKTS1_HUMAN	Q96B36	AKT1S1	Proline-rich AKT1 substrate 1 OS=Homo sapiens OX=9606 GN=AKT1S1 PE=1 SV=1	41.68	0.000314399	48.5774	[6] Phospho (ST)	1	RTEARSS*DEENGP	203	sp|Q96B36|AKTS1_HUMAN	241951	116741	109050	551540	488060	1.98456e+06	116741	551540	0.478531	0.839515	2.24016	0	0	0.0115157	0.0805706	0.0115157	0.0805706
TEARSSDEENGPPSSPDLDR	sp|Q96B36|AKTS1_HUMAN	Q96B36	AKT1S1	Proline-rich AKT1 substrate 1 OS=Homo sapiens OX=9606 GN=AKT1S1 PE=1 SV=1	43.1	0.000217439	48.015	[6] Phospho (ST)|[15] Phospho (ST)	2	RTEARSS*DEENGP,ENGPPSS*PDLDRI	203212	sp|Q96B36|AKTS1_HUMAN	1.1009e+06	652894	867700	1.31033e+06	1.49159e+06	1.56552e+06	867700	1.49159e+06	0.256418	0.0901915	0.78158	0	0	0.0490031	0.177424	0.0490031	0.177424
CGSPSDSSTTEEMEVAVSK	sp|P31751|AKT2_HUMAN	P31751	AKT2	RAC-beta serine/threonine-protein kinase OS=Homo sapiens OX=9606 GN=AKT2 PE=1 SV=2	107.6	0	76.6043	[3] Phospho (ST)	1	MDYKCGS*PSDSST	126	sp|P31751|AKT2_HUMAN	64.3053	8545.54	64.3053	3570.23	64.3053	64.3053	64.3053	64.3053	1.69353	1.64171	0	0.666667	0.666667	0.876588	0.931025	0.876588	0.931025
YFDDEFTAQSITITPPDR	sp|P31751|AKT2_HUMAN	P31751	AKT2	RAC-beta serine/threonine-protein kinase OS=Homo sapiens OX=9606 GN=AKT2 PE=1 SV=2	96.49	0	96.9168	[14] Phospho (ST)	1	AQSITIT*PPDRYD	451	sp|P31751|AKT2_HUMAN	665675	737519	591218	1.24527e+06	494100	137418	665675	494100	0.110039	0.903955	-0.430015	0	0	0.497241	0.666071	0.497241	0.666071
TLTGDVKTSPPR	sp|Q9H8T0|AKTIP_HUMAN	Q9H8T0	AKTIP	AKT-interacting protein OS=Homo sapiens OX=9606 GN=AKTIP PE=1 SV=1	48.68	0.000125016	51.3538	[9] Phospho (ST)	1	TGDVKTS*PPRTAP	30	sp|Q9H8T0|AKTIP_HUMAN	89518.7	136162	169558	187716	140198	110688	136162	140198	0.305147	0.265819	0.0421427	0	0	0.67776	0.803783	0.67776	0.803783
DAAKSSPAFGDR	sp|P13716|HEM2_HUMAN	P13716	ALAD	Delta-aminolevulinic acid dehydratase OS=Homo sapiens OX=9606 GN=ALAD PE=1 SV=1	41.43	0.000312533	31.7909	[6] Phospho (ST)	1	RDAAKSS*PAFGDR	215	sp|P13716|HEM2_HUMAN	48173.1	36193.1	28237.7	25216.8	27689.3	11923.4	36193.1	25216.8	0.267359	0.392382	-0.521329	0	0	0.10534	0.270703	0.10534	0.270703
SSPAFGDR	sp|P13716|HEM2_HUMAN	P13716	ALAD	Delta-aminolevulinic acid dehydratase OS=Homo sapiens OX=9606 GN=ALAD PE=1 SV=1	29.3	0.000933126	33.6145	[2] Phospho (ST)	1	RDAAKSS*PAFGDR	215	sp|P13716|HEM2_HUMAN	116779	142106	200245	49313.7	254396	196531	142106	196531	0.279622	0.634108	0.467787	0	0	0.842816	0.911242	0.842816	0.911242
GILAADESTGSIAK	sp|P04075|ALDOA_HUMAN	P04075	ALDOA	Fructose-bisphosphate aldolase A OS=Homo sapiens OX=9606 GN=ALDOA PE=1 SV=2	55.83	0.000148368	75.1936	[11] Phospho (ST)	1	ADESTGS*IAKRLQ	39	sp|P04075|ALDOA_HUMAN	444526	282349	408502	161099	138597	58089.1	408502	138597	0.22502	0.454114	-1.55945	0	0	0.0120292	0.082434	0.0120292	0.082434
GILAADESTGSIAK	sp|P04075|ALDOA_HUMAN	P04075	ALDOA	Fructose-bisphosphate aldolase A OS=Homo sapiens OX=9606 GN=ALDOA PE=1 SV=2	82.31	0.000287936	78.6037	[8] Phospho (ST)	1	ILAADES*TGSIAK	36	sp|P04075|ALDOA_HUMAN	636808	439299	555249	344823	457109	58262.3	555249	344823	0.182521	0.717295	-0.687278	0	0	0.156352	0.341659	0.156352	0.341659
GILAADESTGSIAKR	sp|P04075|ALDOA_HUMAN	P04075	ALDOA	Fructose-bisphosphate aldolase A OS=Homo sapiens OX=9606 GN=ALDOA PE=1 SV=2	22.49	0.00140911	67.4167	[11] Phospho (ST)	1	ADESTGS*IAKRLQ	39	sp|P04075|ALDOA_HUMAN	117225	92012.3	120006	21637.9	43302.1	570239	117225	43302.1	0.140522	1.46732	-1.43677	0	0.333333	0.744035	0.84896	0.744035	0.84896
LQSIGTENTEENRR	sp|P04075|ALDOA_HUMAN	P04075	ALDOA	Fructose-bisphosphate aldolase A OS=Homo sapiens OX=9606 GN=ALDOA PE=1 SV=2	23.06	0.00135704	40.3258	[3] Phospho (ST)	1	IAKRLQS*IGTENT	46	sp|P04075|ALDOA_HUMAN	349603	395772	390159	426159	164208	384645	390159	384645	0.0665561	0.433201	-0.020537	0	0	0.477239	0.64874	0.477239	0.64874
TVPPAVTGITFLSGGQSEEEASINLNAINK	sp|P04075|ALDOA_HUMAN	P04075	ALDOA	Fructose-bisphosphate aldolase A OS=Homo sapiens OX=9606 GN=ALDOA PE=1 SV=2	17.48	0.00152728	99.5972	[13] Phospho (ST)	1	TGITFLS*GGQSEE	272	sp|P04075|ALDOA_HUMAN	72288.5	57059	63237.6	48779.4	11915.9	14242	63237.6	14242	0.11932	0.826468	-2.15063	0	0.333333	0.034024	0.144806	0.034024	0.144806
GRSGSAAQAEGLCK	sp|Q92685|ALG3_HUMAN	Q92685	ALG3	Dol-P-Man:Man(5)GlcNAc(2)-PP-Dol alpha-1,3-mannosyltransferase OS=Homo sapiens OX=9606 GN=ALG3 PE=1 SV=1	30.87	0.000885668	33.855	[3] Phospho (ST)|[5] Phospho (ST)	2	LRKRGRS*GSAAQA,KRGRSGS*AAQAEG	11,13	sp|Q92685|ALG3_HUMAN	11815.1	36390.6	35012.5	9558.6	2551.36	13959.8	35012.5	9558.6	0.497778	0.662102	-1.873	0	0	0.0679141	0.211108	0.0679141	0.211108
SGSAAQAEGLCK	sp|Q92685|ALG3_HUMAN	Q92685	ALG3	Dol-P-Man:Man(5)GlcNAc(2)-PP-Dol alpha-1,3-mannosyltransferase OS=Homo sapiens OX=9606 GN=ALG3 PE=1 SV=1	41.46	0.00031263	35.5532	[3] Phospho (ST)	1	KRGRSGS*AAQAEG	13	sp|Q92685|ALG3_HUMAN	7.15792e+06	1.285e+07	1.09299e+07	1.77591e+06	376781	1.01709e+06	1.09299e+07	1.01709e+06	0.280804	0.662886	-3.42577	0	0	0.00188028	0.0382642	0.00188028	0.0382642
GSFSSENYWR	sp|Q6P6C2|ALKB5_HUMAN	Q6P6C2	ALKBH5	RNA demethylase ALKBH5 OS=Homo sapiens OX=9606 GN=ALKBH5 PE=1 SV=2	41.53	0.00031325	79.8318	[2] Phospho (ST)	1	THRRRGS*FSSENY	361	sp|Q6P6C2|ALKB5_HUMAN	61661.9	69866.3	57728.3	45066.9	73230.6	20795.5	61661.9	45066.9	0.0981676	0.565988	-0.45231	0	0	0.272933	0.476903	0.272933	0.476903
KSYESSEDCSEAAGSPAR	sp|Q6P6C2|ALKB5_HUMAN	Q6P6C2	ALKBH5	RNA demethylase ALKBH5 OS=Homo sapiens OX=9606 GN=ALKBH5 PE=1 SV=2	164.76	0	26.566	[15] Phospho (ST)	1	CSEAAGS*PARKVK	384	sp|Q6P6C2|ALKB5_HUMAN	1.08328e+06	1.11867e+06	1.06929e+06	696416	1.07069e+06	547067	1.08328e+06	696416	0.0233399	0.349683	-0.63739	0	0	0.152382	0.336356	0.152382	0.336356
KSYESSEDCSEAAGSPARK	sp|Q6P6C2|ALKB5_HUMAN	Q6P6C2	ALKBH5	RNA demethylase ALKBH5 OS=Homo sapiens OX=9606 GN=ALKBH5 PE=1 SV=2	37.49	0.000473037	22.9009	[15] Phospho (ST)	1	CSEAAGS*PARKVK	384	sp|Q6P6C2|ALKB5_HUMAN	44748.9	60496	73197.6	57968.7	106982	32019.7	60496	57968.7	0.239598	0.579804	-0.0615664	0	0	0.998496	0.999308	0.998496	0.999308
KYQEDSDPER	sp|Q6P6C2|ALKB5_HUMAN	Q6P6C2	ALKBH5	RNA demethylase ALKBH5 OS=Homo sapiens OX=9606 GN=ALKBH5 PE=1 SV=2	25.74	0.0012196	18.9037	[6] Phospho (ST)	1	RKYQEDS*DPERSD	64	sp|Q6P6C2|ALKB5_HUMAN	6637.65	42974.8	28715.1	3254.13	49783.3	112339	28715.1	49783.3	0.701217	0.992976	0.793855	0	0	0.806659	0.889541	0.806659	0.889541
KYQEDSDPERSDYEEQQLQK	sp|Q6P6C2|ALKB5_HUMAN	Q6P6C2	ALKBH5	RNA demethylase ALKBH5 OS=Homo sapiens OX=9606 GN=ALKBH5 PE=1 SV=2	22.53	0.00141072	47.9651	[6] Phospho (ST)	1	RKYQEDS*DPERSD	64	sp|Q6P6C2|ALKB5_HUMAN	991197	562059	787502	1.16315e+06	1.34967e+06	385365	787502	1.16315e+06	0.275117	0.529441	0.562683	0	0	0.796917	0.883015	0.796917	0.883015
KYQEDSDPERSDYEEQQLQKEEEAR	sp|Q6P6C2|ALKB5_HUMAN	Q6P6C2	ALKBH5	RNA demethylase ALKBH5 OS=Homo sapiens OX=9606 GN=ALKBH5 PE=1 SV=2	23.86	0.00130836	58.6	[6] Phospho (ST)	1	RKYQEDS*DPERSD	64	sp|Q6P6C2|ALKB5_HUMAN	546079	468935	584556	702540	928274	64940.5	546079	702540	0.110427	0.79211	0.363472	0	0	0.588482	0.738238	0.588482	0.738238
KYQEDSDPERSDYEEQQLQKEEEAR	sp|Q6P6C2|ALKB5_HUMAN	Q6P6C2	ALKBH5	RNA demethylase ALKBH5 OS=Homo sapiens OX=9606 GN=ALKBH5 PE=1 SV=2	44.07	0.000222941	60.1739	[6] Phospho (ST)|[11] Phospho (ST)	2	RKYQEDS*DPERSD,DSDPERS*DYEEQQ	64,69	sp|Q6P6C2|ALKB5_HUMAN	1.26516e+06	755101	1.11528e+06	1.19855e+06	1.10316e+06	392866	1.11528e+06	1.10316e+06	0.250823	0.490114	-0.015767	0	0	0.541293	0.700756	0.541293	0.700756
RGSFSSENYWR	sp|Q6P6C2|ALKB5_HUMAN	Q6P6C2	ALKBH5	RNA demethylase ALKBH5 OS=Homo sapiens OX=9606 GN=ALKBH5 PE=1 SV=2	99.38	0	71.8257	[3] Phospho (ST)	1	THRRRGS*FSSENY	361	sp|Q6P6C2|ALKB5_HUMAN	1.3037e+06	1.11214e+06	1.10548e+06	722257	1.19619e+06	1.72568e+06	1.11214e+06	1.19619e+06	0.095906	0.413239	0.105108	0	0	0.932448	0.963377	0.932448	0.963377
SYESSEDCSEAAGSPAR	sp|Q6P6C2|ALKB5_HUMAN	Q6P6C2	ALKBH5	RNA demethylase ALKBH5 OS=Homo sapiens OX=9606 GN=ALKBH5 PE=1 SV=2	88.41	0	31.2954	[14] Phospho (ST)	1	CSEAAGS*PARKVK	384	sp|Q6P6C2|ALKB5_HUMAN	971806	754310	556596	568478	1.09357e+06	112620	754310	568478	0.272943	0.829817	-0.408053	0	0	0.374526	0.564632	0.374526	0.564632
YQEDSDPERSDYEEQQLQK	sp|Q6P6C2|ALKB5_HUMAN	Q6P6C2	ALKBH5	RNA demethylase ALKBH5 OS=Homo sapiens OX=9606 GN=ALKBH5 PE=1 SV=2	68.77	0.000203335	53.2691	[5] Phospho (ST)	1	RKYQEDS*DPERSD	64	sp|Q6P6C2|ALKB5_HUMAN	1.68825e+06	1.70942e+06	1.94428e+06	2.88553e+06	3.94262e+06	1.90989e+06	1.70942e+06	2.88553e+06	0.0798042	0.349038	0.755328	0	0	0.117013	0.287989	0.117013	0.287989
YQEDSDPERSDYEEQQLQK	sp|Q6P6C2|ALKB5_HUMAN	Q6P6C2	ALKBH5	RNA demethylase ALKBH5 OS=Homo sapiens OX=9606 GN=ALKBH5 PE=1 SV=2	37.61	0.000474563	54.23	[5] Phospho (ST)|[10] Phospho (ST)	2	RKYQEDS*DPERSD,DSDPERS*DYEEQQ	64,69	sp|Q6P6C2|ALKB5_HUMAN	1.47009e+06	895037	730628	665166	816925	641374	895037	665166	0.376261	0.134542	-0.428232	0.166667	0	0.224318	0.423392	0.224318	0.423392
YQEDSDPERSDYEEQQLQKEEEAR	sp|Q6P6C2|ALKB5_HUMAN	Q6P6C2	ALKBH5	RNA demethylase ALKBH5 OS=Homo sapiens OX=9606 GN=ALKBH5 PE=1 SV=2	64.13	0.000183318	63.3123	[5] Phospho (ST)	1	RKYQEDS*DPERSD	64	sp|Q6P6C2|ALKB5_HUMAN	2.33411e+06	2.3289e+06	2.34114e+06	4.12058e+06	4.96091e+06	8.56127e+06	2.33411e+06	4.96091e+06	0.00262998	0.401122	1.08773	0	0	0.0136842	0.0876344	0.0136842	0.0876344
YQEDSDPERSDYEEQQLQKEEEAR	sp|Q6P6C2|ALKB5_HUMAN	Q6P6C2	ALKBH5	RNA demethylase ALKBH5 OS=Homo sapiens OX=9606 GN=ALKBH5 PE=1 SV=2	45.67	0.000115741	65.1191	[5] Phospho (ST)|[12] Phospho (Y)	2	RKYQEDS*DPERSD,DPERSDY*EEQQLQ	64,71	sp|Q6P6C2|ALKB5_HUMAN	2.34291e+06	1.76454e+06	1.81804e+06	3.44207e+06	2.36406e+06	1.42954e+06	1.81804e+06	2.36406e+06	0.161809	0.417563	0.37888	0	0	0.623278	0.764897	0.623278	0.764897
KSSSLVDIREEETEGGSR	sp|Q96Q42|ALS2_HUMAN	Q96Q42	ALS2	Alsin OS=Homo sapiens OX=9606 GN=ALS2 PE=1 SV=2	13.69	0.00177661	58.5782	[4] Phospho (ST)	1	QGKKSSS*LVDIRE	466	sp|Q96Q42|ALS2_HUMAN	366560	445367	534570	522638	274591	493506	445367	493506	0.187283	0.315134	0.148074	0	0	0.794865	0.881269	0.794865	0.881269
LSLPGLLSQVSPR	sp|Q96Q42|ALS2_HUMAN	Q96Q42	ALS2	Alsin OS=Homo sapiens OX=9606 GN=ALS2 PE=1 SV=2	22.43	0.00140741	99.8926	[11] Phospho (ST)	1	GLLSQVS*PRLLRK	492	sp|Q96Q42|ALS2_HUMAN	106372	81395.2	74197.8	141920	62744.2	140419	81395.2	140419	0.193375	0.39369	0.786728	0	0	0.482074	0.652941	0.482074	0.652941
QHRDSPEILSR	sp|Q96Q42|ALS2_HUMAN	Q96Q42	ALS2	Alsin OS=Homo sapiens OX=9606 GN=ALS2 PE=1 SV=2	42.44	0.000213972	40.6251	[5] Phospho (ST)	1	RRQHRDS*PEILSR	1335	sp|Q96Q42|ALS2_HUMAN	138629	142683	162893	102599	100724	135827	142683	102599	0.0877809	0.174682	-0.475799	0	0	0.19226	0.386466	0.19226	0.386466
RLSLPGLLSQVSPR	sp|Q96Q42|ALS2_HUMAN	Q96Q42	ALS2	Alsin OS=Homo sapiens OX=9606 GN=ALS2 PE=1 SV=2	79.64	0.000269397	99.164	[3] Phospho (ST)|[12] Phospho (ST)	2	GGSRRLS*LPGLLS,GLLSQVS*PRLLRK	483492	sp|Q96Q42|ALS2_HUMAN	314865	326279	353231	340627	234059	814189	326279	340627	0.059435	0.667029	0.062084	0	0	0.60419	0.750957	0.60419	0.750957
RQHRDSPEILSR	sp|Q96Q42|ALS2_HUMAN	Q96Q42	ALS2	Alsin OS=Homo sapiens OX=9606 GN=ALS2 PE=1 SV=2	42.2	0.000319013	33.6377	[6] Phospho (ST)	1	RRQHRDS*PEILSR	1335	sp|Q96Q42|ALS2_HUMAN	178707	196319	222858	91233.3	100220	150618	196319	100220	0.11152	0.280719	-0.970028	0.222222	0.222222	0.0386071	0.154766	0.0386071	0.154766
SSSLVDIREEETEGGSR	sp|Q96Q42|ALS2_HUMAN	Q96Q42	ALS2	Alsin OS=Homo sapiens OX=9606 GN=ALS2 PE=1 SV=2	33.24	0.000767067	66.7916	[3] Phospho (ST)	1	QGKKSSS*LVDIRE	466	sp|Q96Q42|ALS2_HUMAN	165369	153713	143214	176060	125747	46033.9	153713	125747	0.0719182	0.565472	-0.28972	0	0	0.308569	0.504609	0.308569	0.504609
LELSSSASPQEER	sp|Q9C0C7|AMRA1_HUMAN	Q9C0C7	AMBRA1	Activating molecule in BECN1-regulated autophagy protein 1 OS=Homo sapiens OX=9606 GN=AMBRA1 PE=1 SV=2	72.16	0.000222568	54.8596	[8] Phospho (ST)	1	ELSSSAS*PQEERT	639	sp|Q9C0C7|AMRA1_HUMAN	245217	234156	206469	475933	285917	406286	234156	406286	0.0873075	0.246879	0.795025	0	0.333333	0.0539666	0.187444	0.0539666	0.187444
SSQTGTEPGAAHTSSPQPSTSR	sp|Q9C0C7|AMRA1_HUMAN	Q9C0C7	AMBRA1	Activating molecule in BECN1-regulated autophagy protein 1 OS=Homo sapiens OX=9606 GN=AMBRA1 PE=1 SV=2	51.17	0.000133014	26.9383	[15] Phospho (ST)	1	GAAHTSS*PQPSTS	1205	sp|Q9C0C7|AMRA1_HUMAN	304345	348562	382545	286108	337929	390585	348562	337929	0.113607	0.154459	-0.0446971	0	0	0.902991	0.946347	0.902991	0.946347
SDSIRPALNSPVERPSSDQEEGETSAQTER	sp|Q9UKV5|AMFR_HUMAN	Q9UKV5	AMFR	E3 ubiquitin-protein ligase AMFR OS=Homo sapiens OX=9606 GN=AMFR PE=1 SV=2	15.01	0.00176036	67.0065	[10] Phospho (ST)|[16] Phospho (ST)	2	IRPALNS*PVERPS,SPVERPS*SDQEEG	516522	sp|Q9UKV5|AMFR_HUMAN	64.3053	64.3053	5098.69	64.3053	64.3053	929404	64.3053	64.3053	1.66813	1.73169	0	0.666667	0.666667	0.581882	0.733048	0.581882	0.733048
SDSIRPALNSPVERPSSDQEEGETSAQTER	sp|Q9UKV5|AMFR_HUMAN	Q9UKV5	AMFR	E3 ubiquitin-protein ligase AMFR OS=Homo sapiens OX=9606 GN=AMFR PE=1 SV=2	42.51	0.000214431	68.324	[17] Phospho (ST)	1	PVERPSS*DQEEGE	523	sp|Q9UKV5|AMFR_HUMAN	708648	956073	950187	874374	386184	1.05011e+06	950187	874374	0.161974	0.446623	-0.119961	0	0	0.556204	0.713104	0.556204	0.713104
VPLDLSPR	sp|Q9UKV5|AMFR_HUMAN	Q9UKV5	AMFR	E3 ubiquitin-protein ligase AMFR OS=Homo sapiens OX=9606 GN=AMFR PE=1 SV=2	21.36	0.00137841	81.4031	[6] Phospho (ST)	1	RVPLDLS*PRLEET	542	sp|Q9UKV5|AMFR_HUMAN	30363	41893.5	39235.8	25600.8	4371.14	29655.2	39235.8	25600.8	0.162467	0.683222	-0.615984	0	0	0.155678	0.340924	0.155678	0.340924
LSSSPPSGSGGGGGASSSSHCSGESQCR	sp|Q9Y4X0|AMMR1_HUMAN	Q9Y4X0	AMMECR1	AMME syndrome candidate gene 1 protein OS=Homo sapiens OX=9606 GN=AMMECR1 PE=1 SV=1	45.78	0.000116009	28.5284	[4] Phospho (ST)	1	KQKLSSS*PPSGSG	16	sp|Q9Y4X0|AMMR1_HUMAN	686209	879937	855308	1.04317e+06	473369	785228	855308	785228	0.130658	0.37188	-0.123332	0	0	0.729446	0.839187	0.729446	0.839187
ANSGQAHKDEALK	sp|Q8IY63|AMOL1_HUMAN	Q8IY63	AMOTL1	Angiomotin-like protein 1 OS=Homo sapiens OX=9606 GN=AMOTL1 PE=1 SV=1	20.65	0.00149022	17.1699	[3] Phospho (ST)	1	TVNRANS*GQAHKD	241	sp|Q8IY63|AMOL1_HUMAN	172507	209212	279215	53470.2	139934	516150	209212	139934	0.246075	1.04008	-0.58022	0	0	0.609096	0.754264	0.609096	0.754264
LSTTPAHSPVLK	sp|Q8IY63|AMOL1_HUMAN	Q8IY63	AMOTL1	Angiomotin-like protein 1 OS=Homo sapiens OX=9606 GN=AMOTL1 PE=1 SV=1	31.36	0.000896715	55.7735	[8] Phospho (ST)	1	STTPAHS*PVLKHP	906	sp|Q8IY63|AMOL1_HUMAN	262418	216782	227558	349873	648396	836320	227558	648396	0.101251	0.401142	1.51064	0	0	0.0196683	0.106569	0.0196683	0.106569
QTSLTSSQLAEEK	sp|Q8IY63|AMOL1_HUMAN	Q8IY63	AMOTL1	Angiomotin-like protein 1 OS=Homo sapiens OX=9606 GN=AMOTL1 PE=1 SV=1	59.85	0.000163988	57.2081	[3] Phospho (ST)	1	THSRQTS*LTSSQL	809	sp|Q8IY63|AMOL1_HUMAN	102582	103749	108646	120835	95014.1	27116.3	103749	95014.1	0.0306465	0.597714	-0.126879	0	0	0.344978	0.537921	0.344978	0.537921
SVPSIAAATGTHSR	sp|Q8IY63|AMOL1_HUMAN	Q8IY63	AMOTL1	Angiomotin-like protein 1 OS=Homo sapiens OX=9606 GN=AMOTL1 PE=1 SV=1	39.71	0.0004997	60.5325	[13] Phospho (ST)	1	AATGTHS*RQTSLT	805	sp|Q8IY63|AMOL1_HUMAN	12711.1	2715.98	13083.2	12517.5	25356.8	4458.78	12711.1	12517.5	0.618833	0.746915	-0.0221344	0	0	0.571221	0.724695	0.571221	0.724695
AASLDSVATSR	sp|Q9Y2J4|AMOL2_HUMAN	Q9Y2J4	AMOTL2	Angiomotin-like protein 2 OS=Homo sapiens OX=9606 GN=AMOTL2 PE=1 SV=3	46.74	0.000118582	54.9473	[3] Phospho (ST)	1	SSQRAAS*LDSVAT	759	sp|Q9Y2J4|AMOL2_HUMAN	26106.7	22551.4	13393.8	47063.4	74697.6	3875.61	22551.4	47063.4	0.317102	0.852327	1.06139	0	0	0.830283	0.90456	0.830283	0.90456
APSHMSSSHSFPQLAR	sp|Q9Y2J4|AMOL2_HUMAN	Q9Y2J4	AMOTL2	Angiomotin-like protein 2 OS=Homo sapiens OX=9606 GN=AMOTL2 PE=1 SV=3	51.49	0.000133994	57.2786	[5] Oxidation (M)|[10] Phospho (ST)	2	ARAPSHM*SSSHSF,HMSSSHS*FPQLAR	178183	sp|Q9Y2J4|AMOL2_HUMAN	136179	107923	103922	191222	286.234	91610.8	107923	91610.8	0.151566	1.01192	-0.236417	0	0.333333	0.319874	0.515117	0.319874	0.515117
ARGSPHFQHAEVR	sp|Q9Y2J4|AMOL2_HUMAN	Q9Y2J4	AMOTL2	Angiomotin-like protein 2 OS=Homo sapiens OX=9606 GN=AMOTL2 PE=1 SV=3	51	0.000132485	29.0127	[4] Phospho (ST)	1	RYRARGS*PHFQHA	236	sp|Q9Y2J4|AMOL2_HUMAN	26493.6	23520.6	39225.7	36158.2	64156.9	36759.7	26493.6	36759.7	0.280456	0.350048	0.472481	0	0	0.16714	0.354945	0.16714	0.354945
DTTLIRHSPQPSPSSSFNEGLLTGGHR	sp|Q9Y2J4|AMOL2_HUMAN	Q9Y2J4	AMOTL2	Angiomotin-like protein 2 OS=Homo sapiens OX=9606 GN=AMOTL2 PE=1 SV=3	102.23	0	86.996	[3] Phospho (ST)	1	AAQRDTT*LIRHSP	597	sp|Q9Y2J4|AMOL2_HUMAN	1.08392e+06	872198	880014	1.43953e+06	2.06878e+06	2.1987e+06	880014	2.06878e+06	0.126983	0.213437	1.23318	0	0	0.017447	0.100144	0.017447	0.100144
DTTLIRHSPQPSPSSSFNEGLLTGGHR	sp|Q9Y2J4|AMOL2_HUMAN	Q9Y2J4	AMOTL2	Angiomotin-like protein 2 OS=Homo sapiens OX=9606 GN=AMOTL2 PE=1 SV=3	71.88	0.000221043	89.5983	[8] Phospho (ST)|[12] Phospho (ST)	2	TTLIRHS*PQPSPS,RHSPQPS*PSSSFN	602606	sp|Q9Y2J4|AMOL2_HUMAN	448805	360193	376438	1.18548e+06	1.2733e+06	2.17073e+06	376438	1.2733e+06	0.119386	0.353334	1.75809	0	0	0.00169236	0.0363907	0.00169236	0.0363907
HSPQPSPSSSFNEGLLTGGHR	sp|Q9Y2J4|AMOL2_HUMAN	Q9Y2J4	AMOTL2	Angiomotin-like protein 2 OS=Homo sapiens OX=9606 GN=AMOTL2 PE=1 SV=3	83.01	0.00029274	81.1065	[2] Phospho (ST)	1	TTLIRHS*PQPSPS	602	sp|Q9Y2J4|AMOL2_HUMAN	223706	154792	150909	249747	335963	1.9971e+06	154792	335963	0.232078	1.14397	1.11797	0	0	0.0977522	0.259376	0.0977522	0.259376
QDFLKTDSDSDLQLYK	sp|Q01433|AMPD2_HUMAN	Q01433	AMPD2	AMP deaminase 2 OS=Homo sapiens OX=9606 GN=AMPD2 PE=1 SV=2	16.06	0.00155141	90.2435	[8] Phospho (ST)	1	DFLKTDS*DSDLQL	190	sp|Q01433|AMPD2_HUMAN	64.3053	64.3053	64.3053	55033.5	18651.4	64.3053	64.3053	18651.4	0	1.13739	8.18013	1	0.333333	0.0616521	0.200595	0.0616521	0.200595
QISQDVK	sp|Q01433|AMPD2_HUMAN	Q01433	AMPD2	AMP deaminase 2 OS=Homo sapiens OX=9606 GN=AMPD2 PE=1 SV=2	18.42	0.00155444	29.101	[3] Phospho (ST)	1	RLERQIS*QDVKLE	168	sp|Q01433|AMPD2_HUMAN	195821	340717	347203	107789	113346	517487	340717	113346	0.290547	0.954284	-1.58784	0	0	0.414083	0.599696	0.414083	0.599696
TDSDSDLQLYK	sp|Q01433|AMPD2_HUMAN	Q01433	AMPD2	AMP deaminase 2 OS=Homo sapiens OX=9606 GN=AMPD2 PE=1 SV=2	71.29	0.00021777	71.695	[3] Phospho (ST)	1	DFLKTDS*DSDLQL	190	sp|Q01433|AMPD2_HUMAN	218853	182512	184662	1.12175e+06	624848	859374	184662	859374	0.104376	0.286169	2.2184	0	0	0.000765917	0.0259242	0.000765917	0.0259242
TPSPPEEPSPLPSPTASPNHTLAPASPAPARPR	sp|P49418|AMPH_HUMAN	P49418	AMPH	Amphiphysin OS=Homo sapiens OX=9606 GN=AMPH PE=1 SV=1	35.84	0.000454091	85.8761	[26] Phospho (ST)	1	HTLAPAS*PAPARP	285	sp|P49418|AMPH_HUMAN	236930	217984	163473	136845	208942	178951	217984	178951	0.185013	0.207061	-0.284658	0	0	0.469866	0.643024	0.469866	0.643024
TPSPPEEPSPLPSPTASPNHTLAPASPAPARPR	sp|P49418|AMPH_HUMAN	P49418	AMPH	Amphiphysin OS=Homo sapiens OX=9606 GN=AMPH PE=1 SV=1	32.62	0.000756175	84.3756	[9] Phospho (ST)|[13] Phospho (ST)	2	SPPEEPS*PLPSPT,EPSPLPS*PTASPN	268272	sp|P49418|AMPH_HUMAN	34490.2	10918	16140.6	42583.6	50978.7	946117	16140.6	50978.7	0.60344	1.4983	1.6592	0	0.333333	0.0803234	0.232851	0.0803234	0.232851
FNISSHNQSPK	sp|Q9H1A4|APC1_HUMAN	Q9H1A4	ANAPC1	Anaphase-promoting complex subunit 1 OS=Homo sapiens OX=9606 GN=ANAPC1 PE=1 SV=1	65.39	0.000188893	41.0352	[9] Phospho (ST)	1	ISSHNQS*PKRHSI	377	sp|Q9H1A4|APC1_HUMAN	608621	421234	526318	799156	277087	454265	526318	454265	0.181068	0.520389	-0.2124	0	0	0.76974	0.865799	0.76974	0.865799
FNISSHNQSPKR	sp|Q9H1A4|APC1_HUMAN	Q9H1A4	ANAPC1	Anaphase-promoting complex subunit 1 OS=Homo sapiens OX=9606 GN=ANAPC1 PE=1 SV=1	44.54	0.000225683	34.0147	[9] Phospho (ST)	1	ISSHNQS*PKRHSI	377	sp|Q9H1A4|APC1_HUMAN	206278	265405	192961	276287	305618	277662	206278	277662	0.174051	0.0577661	0.42874	0	0.166667	0.20289	0.399216	0.20289	0.399216
HKSPSYQIK	sp|Q9H1A4|APC1_HUMAN	Q9H1A4	ANAPC1	Anaphase-promoting complex subunit 1 OS=Homo sapiens OX=9606 GN=ANAPC1 PE=1 SV=1	13.72	0.00177773	26.4016	[3] Phospho (ST)	1	HREKHKS*PSYQIK	1347	sp|Q9H1A4|APC1_HUMAN	65315.4	80437.3	64393.8	56730.1	90826.9	108180	65315.4	90826.9	0.128603	0.307055	0.475696	0	0	0.512527	0.678679	0.512527	0.678679
NFDFEGSLSPVIAPK	sp|Q9H1A4|APC1_HUMAN	Q9H1A4	ANAPC1	Anaphase-promoting complex subunit 1 OS=Homo sapiens OX=9606 GN=ANAPC1 PE=1 SV=1	69.77	0.000208768	98.2708	[9] Phospho (ST)	1	DFEGSLS*PVIAPK	688	sp|Q9H1A4|APC1_HUMAN	473508	581713	524792	1.0092e+06	667994	76772.7	524792	667994	0.102771	0.806916	0.348089	0	0	0.641575	0.778156	0.641575	0.778156
PSTPLDGVSTPKPLSK	sp|Q9H1A4|APC1_HUMAN	Q9H1A4	ANAPC1	Anaphase-promoting complex subunit 1 OS=Homo sapiens OX=9606 GN=ANAPC1 PE=1 SV=1	84.74	0.000306373	76.1413	[3] Phospho (ST)	1	TMPRPST*PLDGVS	530	sp|Q9H1A4|APC1_HUMAN	192134	164472	158945	168402	69312.4	61719.6	164472	69312.4	0.103474	0.596351	-1.24666	0	0	0.0908062	0.249111	0.0908062	0.249111
SPSISNMAALSR	sp|Q9H1A4|APC1_HUMAN	Q9H1A4	ANAPC1	Anaphase-promoting complex subunit 1 OS=Homo sapiens OX=9606 GN=ANAPC1 PE=1 SV=1	10.68	0.00180486	84.568	[3] Phospho (ST)	1	LHSRSPS*ISNMAA	343	sp|Q9H1A4|APC1_HUMAN	18292	24562.8	18330.8	70071.3	55969.3	101234	18330.8	70071.3	0.176969	0.305733	1.93456	0	0	0.0018501	0.0379158	0.0018501	0.0379158
LLHQFSFSPER	sp|Q9UJX6|ANC2_HUMAN	Q9UJX6	ANAPC2	Anaphase-promoting complex subunit 2 OS=Homo sapiens OX=9606 GN=ANAPC2 PE=1 SV=1	18.69	0.00156221	88.2	[8] Phospho (ST)	1	LHQFSFS*PEREIR	534	sp|Q9UJX6|ANC2_HUMAN	224898	191036	197965	207085	327720	254276	197965	254276	0.0874176	0.231124	0.361152	0	0	0.290365	0.489528	0.290365	0.489528
TDPASLETGQDSEDDSGEPEDWVPDPVDADPGK	sp|Q9UJX6|ANC2_HUMAN	Q9UJX6	ANAPC2	Anaphase-promoting complex subunit 2 OS=Homo sapiens OX=9606 GN=ANAPC2 PE=1 SV=1	38.13	0.000480769	95.977	[16] Phospho (ST)	1	QDSEDDS*GEPEDW	474	sp|Q9UJX6|ANC2_HUMAN	657109	651455	585748	116984	130068	47761.9	651455	116984	0.0628229	0.450069	-2.47735	0	0	0.0010746	0.0290633	0.0010746	0.0290633
IKEEVLSESEAENQQAGAAALAPEIVIK	sp|Q9UJX5|APC4_HUMAN	Q9UJX5	ANAPC4	Anaphase-promoting complex subunit 4 OS=Homo sapiens OX=9606 GN=ANAPC4 PE=1 SV=2	67.98	0.000199362	96.3296	[7] Phospho (ST)	1	IKEEVLS*ESEAEN	777	sp|Q9UJX5|APC4_HUMAN	3.22696e+06	2.85747e+06	3.47931e+06	3.6056e+06	2.34868e+06	3.37771e+06	3.22696e+06	3.37771e+06	0.0981056	0.21528	0.0658706	0	0	0.857697	0.92006	0.857697	0.92006
EADAATSFLR	sp|P16157|ANK1_HUMAN	P16157	ANK1	Ankyrin-1 OS=Homo sapiens OX=9606 GN=ANK1 PE=1 SV=3	18.39	0.00155347	85.4303	[7] Phospho (ST)	1	EADAATS*FLRAAR	15	sp|P16157|ANK1_HUMAN	2.6658e+06	3.36173e+06	3.52582e+06	2.74852e+06	1.71786e+06	3.36103e+06	3.36173e+06	2.74852e+06	0.143383	0.318269	-0.290548	0	0	0.38747	0.575873	0.38747	0.575873
ITHSPTVSQVTER	sp|P16157|ANK1_HUMAN	P16157	ANK1	Ankyrin-1 OS=Homo sapiens OX=9606 GN=ANK1 PE=1 SV=3	105.28	0	47.1336	[4] Phospho (ST)	1	QARITHS*PTVSQV	1686	sp|P16157|ANK1_HUMAN	3.63091e+06	4.87206e+06	5.44572e+06	1.34072e+07	5.88011e+06	7.34933e+06	4.87206e+06	7.34933e+06	0.19951	0.449363	0.593082	0	0	0.0824471	0.236254	0.0824471	0.236254
RDSRDVDEEKELLDFVPK	sp|P16157|ANK1_HUMAN	P16157	ANK1	Ankyrin-1 OS=Homo sapiens OX=9606 GN=ANK1 PE=1 SV=3	26.16	0.00115841	94.8337	[3] Phospho (ST)	1	KAERRDS*RDVDEE	834	sp|P16157|ANK1_HUMAN	1.09391e+06	953931	837602	2.14528e+06	1.40073e+06	84079.2	953931	1.40073e+06	0.133432	0.862581	0.554225	0	0	0.65474	0.787796	0.65474	0.787796
RRTPTPLALR	sp|P16157|ANK1_HUMAN	P16157	ANK1	Ankyrin-1 OS=Homo sapiens OX=9606 GN=ANK1 PE=1 SV=3	27.63	0.0010483	57.2081	[3] Phospho (ST)	1	AEDRRRT*PTPLAL	1378	sp|P16157|ANK1_HUMAN	82057	95167.6	109966	127828	68405.2	12935.7	95167.6	68405.2	0.145857	0.824082	-0.476365	0	0	0.309243	0.505087	0.309243	0.505087
RTPTPLALR	sp|P16157|ANK1_HUMAN	P16157	ANK1	Ankyrin-1 OS=Homo sapiens OX=9606 GN=ANK1 PE=1 SV=3	33.42	0.000684873	64.8316	[4] Phospho (ST)	1	DRRRTPT*PLALRY	1380	sp|P16157|ANK1_HUMAN	92563.3	87684.4	75196.3	183986	117441	101946	87684.4	117441	0.105194	0.324166	0.421548	0	0	0.112838	0.28169	0.112838	0.28169
GGSPIIQEPEEPSEHREESSPR	sp|Q01484|ANK2_HUMAN	Q01484	ANK2	Ankyrin-2 OS=Homo sapiens OX=9606 GN=ANK2 PE=1 SV=4	26.85	0.00110278	57.6514	[3] Phospho (ST)	1	SSERGGS*PIIQEP	3823	sp|Q01484|ANK2_HUMAN	239495	214521	212545	7985.35	8865.8	48578.3	214521	8865.8	0.0676079	1.06312	-4.59673	0	0	0.00259013	0.0429995	0.00259013	0.0429995
VVLKSDTEQSEDNNE	sp|Q01484|ANK2_HUMAN	Q01484	ANK2	Ankyrin-2 OS=Homo sapiens OX=9606 GN=ANK2 PE=1 SV=4	30.41	0.000876983	38.2388	[5] Phospho (ST)	1	KRVVLKS*DTEQSE	3947	sp|Q01484|ANK2_HUMAN	64.3053	64.3053	64.3053	64.3053	64.3053	40344.2	64.3053	64.3053	0	1.72379	0	1	0.666667	0.286196	0.488809	0.286196	0.488809
ANVVTTPSTNRK	sp|Q8IWZ3|ANKH1_HUMAN	Q8IWZ3	ANKHD1	Ankyrin repeat and KH domain-containing protein 1 OS=Homo sapiens OX=9606 GN=ANKHD1 PE=1 SV=1	43.12	0.000217604	29.4712	[6] Phospho (ST)	1	RANVVTT*PSTNRK	1538	sp|Q8IWZ3|ANKH1_HUMAN	8914.5	12667.3	19812.3	23776.2	32445.2	198969	12667.3	32445.2	0.401232	1.16078	1.35689	0	0	0.0648241	0.205662	0.0648241	0.205662
GGGAGGNSDSDNLDSTDCNSESSSGGK	sp|Q8IWZ3|ANKH1_HUMAN	Q8IWZ3	ANKHD1	Ankyrin repeat and KH domain-containing protein 1 OS=Homo sapiens OX=9606 GN=ANKHD1 PE=1 SV=1	52.45	0.0001365	30.2658	[10] Phospho (ST)	1	AGGNSDS*DNLDST	1593	sp|Q8IWZ3|ANKH1_HUMAN	119620	274544	322976	99891.7	128817	679604	274544	128817	0.444363	1.07893	-1.09172	0	0	0.917448	0.954822	0.917448	0.954822
LNLTSPK	sp|Q8IWZ3|ANKH1_HUMAN	Q8IWZ3	ANKHD1	Ankyrin repeat and KH domain-containing protein 1 OS=Homo sapiens OX=9606 GN=ANKHD1 PE=1 SV=1	27.38	0.00104205	55.9914	[5] Phospho (ST)	1	IKLNLTS*PKRGQK	1679	sp|Q8IWZ3|ANKH1_HUMAN	348871	423061	406446	541176	693231	645960	406446	645960	0.0991207	0.124155	0.66838	0	0	0.0451048	0.169439	0.0451048	0.169439
LNLTSPKR	sp|Q8IWZ3|ANKH1_HUMAN	Q8IWZ3	ANKHD1	Ankyrin repeat and KH domain-containing protein 1 OS=Homo sapiens OX=9606 GN=ANKHD1 PE=1 SV=1	32.17	0.000748005	43.8693	[5] Phospho (ST)	1	IKLNLTS*PKRGQK	1679	sp|Q8IWZ3|ANKH1_HUMAN	713117	663575	644228	976581	1.62341e+06	798701	663575	976581	0.0527437	0.383094	0.55748	0	0	0.101784	0.265382	0.101784	0.265382
TVSLPLSSPNIK	sp|Q8IWZ3|ANKH1_HUMAN	Q8IWZ3	ANKHD1	Ankyrin repeat and KH domain-containing protein 1 OS=Homo sapiens OX=9606 GN=ANKHD1 PE=1 SV=1	20.75	0.00142783	93.2174	[8] Phospho (ST)	1	VSLPLSS*PNIKLN	1670	sp|Q8IWZ3|ANKH1_HUMAN	40913.4	38028	35559.5	61340.8	26269.8	67769.2	38028	61340.8	0.0702097	0.431262	0.689785	0	0	0.485545	0.655973	0.485545	0.655973
GVAPADSPEAPR	sp|Q9P2G1|AKIB1_HUMAN	Q9P2G1	ANKIB1	Ankyrin repeat and IBR domain-containing protein 1 OS=Homo sapiens OX=9606 GN=ANKIB1 PE=1 SV=3	64.98	0.000187196	41.6129	[7] Phospho (ST)	1	GVAPADS*PEAPRR	737	sp|Q9P2G1|AKIB1_HUMAN	1.08981e+06	1.71952e+06	1.45257e+06	2.0242e+06	2.19878e+06	1.61795e+06	1.45257e+06	2.0242e+06	0.222482	0.153067	0.478736	0	0	0.181214	0.372915	0.181214	0.372915
GVAPADSPEAPRR	sp|Q9P2G1|AKIB1_HUMAN	Q9P2G1	ANKIB1	Ankyrin repeat and IBR domain-containing protein 1 OS=Homo sapiens OX=9606 GN=ANKIB1 PE=1 SV=3	63.53	0.00018044	34.1868	[7] Phospho (ST)	1	GVAPADS*PEAPRR	737	sp|Q9P2G1|AKIB1_HUMAN	588958	1.02929e+06	1.05522e+06	1.06591e+06	1.4572e+06	1.13878e+06	1.02929e+06	1.13878e+06	0.294035	0.170481	0.145837	0	0	0.215018	0.412976	0.215018	0.412976
LDSVPR	sp|Q9P2G1|AKIB1_HUMAN	Q9P2G1	ANKIB1	Ankyrin repeat and IBR domain-containing protein 1 OS=Homo sapiens OX=9606 GN=ANKIB1 PE=1 SV=3	32.5	0.000753832	36.8124	[3] Phospho (ST)	1	LPSRLDS*VPRNTD	898	sp|Q9P2G1|AKIB1_HUMAN	8052.3	5689.95	1430.8	9330.92	8176.81	19691.3	5689.95	9330.92	0.66349	0.511387	0.713603	0	0	0.0987957	0.26079	0.0987957	0.26079
AFAGPLSPAK	sp|Q86XL3|ANKL2_HUMAN	Q86XL3	ANKLE2	Ankyrin repeat and LEM domain-containing protein 2 OS=Homo sapiens OX=9606 GN=ANKLE2 PE=1 SV=4	31.94	0.000744725	74.4029	[7] Phospho (ST)	1	AFAGPLS*PAKAED	528	sp|Q86XL3|ANKL2_HUMAN	17720.5	15373.9	15118	4579.78	4120.53	2484.87	15373.9	4120.53	0.0892566	0.295338	-1.89958	0	0	0.000872126	0.0272112	0.000872126	0.0272112
AFAGPLSPAKAEDFRK	sp|Q86XL3|ANKL2_HUMAN	Q86XL3	ANKLE2	Ankyrin repeat and LEM domain-containing protein 2 OS=Homo sapiens OX=9606 GN=ANKLE2 PE=1 SV=4	11.34	0.00182391	81.5932	[7] Phospho (ST)	1	AFAGPLS*PAKAED	528	sp|Q86XL3|ANKL2_HUMAN	4150.04	23043.2	10289.3	2490.11	2420.92	14765.7	10289.3	2490.11	0.771368	1.08362	-2.04687	0	0	0.283939	0.48819	0.283939	0.48819
GICDYFPSPSK	sp|Q86XL3|ANKL2_HUMAN	Q86XL3	ANKLE2	Ankyrin repeat and LEM domain-containing protein 2 OS=Homo sapiens OX=9606 GN=ANKLE2 PE=1 SV=4	15.88	0.00154651	88.0668	[8] Phospho (ST)	1	ICDYFPS*PSKTSL	259	sp|Q86XL3|ANKL2_HUMAN	4375.24	3944.67	64.3053	2689.1	545.337	64.3053	3944.67	545.337	0.849598	1.27086	-2.85468	0.333333	0.333333	0.604203	0.750957	0.604203	0.750957
NNSPPTVGAFGHTR	sp|Q86XL3|ANKL2_HUMAN	Q86XL3	ANKLE2	Ankyrin repeat and LEM domain-containing protein 2 OS=Homo sapiens OX=9606 GN=ANKLE2 PE=1 SV=4	52.26	0.000136036	65.5408	[3] Phospho (ST)	1	NAARNNS*PPTVGA	662	sp|Q86XL3|ANKL2_HUMAN	334582	230038	252406	398025	303713	66650	252406	303713	0.202133	0.666597	0.266961	0	0	0.584874	0.735462	0.584874	0.735462
SAVLCYSPSDR	sp|Q86XL3|ANKL2_HUMAN	Q86XL3	ANKLE2	Ankyrin repeat and LEM domain-containing protein 2 OS=Homo sapiens OX=9606 GN=ANKLE2 PE=1 SV=4	27.08	0.00103451	67.8371	[7] Phospho (ST)	1	SAVLCYS*PSDRQS	866	sp|Q86XL3|ANKL2_HUMAN	43610.1	49619.9	64254.5	141673	62287.6	24921.2	49619.9	62287.6	0.202272	0.781486	0.328026	0	0	0.754045	0.856263	0.754045	0.856263
SGTPVPPPSAAAAPASGEMTMDALLAR	sp|Q86XL3|ANKL2_HUMAN	Q86XL3	ANKLE2	Ankyrin repeat and LEM domain-containing protein 2 OS=Homo sapiens OX=9606 GN=ANKLE2 PE=1 SV=4	43.47	0.000219611	98.718	[3] Phospho (ST)	1	GLGRSGT*PVPPPS	47	sp|Q86XL3|ANKL2_HUMAN	91114.6	5838.21	110444	106030	4691.23	11541.9	91114.6	11541.9	0.80512	1.38964	-2.9808	0	0	0.521091	0.685595	0.521091	0.685595
YGGSPRDPVLTLR	sp|Q86XL3|ANKL2_HUMAN	Q86XL3	ANKLE2	Ankyrin repeat and LEM domain-containing protein 2 OS=Homo sapiens OX=9606 GN=ANKLE2 PE=1 SV=4	14.19	0.0017326	83.4931	[4] Phospho (ST)	1	VSRYGGS*PRDPVL	512	sp|Q86XL3|ANKL2_HUMAN	11963.8	4670.68	11992.9	2134.76	2785.15	11385.9	11963.8	2785.15	0.44214	0.950025	-2.10285	0	0	0.208745	0.405882	0.208745	0.405882
ANPELCGSLHLNGSPSSCIASR	sp|Q9NXR5|ANR10_HUMAN	Q9NXR5	ANKRD10	Ankyrin repeat domain-containing protein 10 OS=Homo sapiens OX=9606 GN=ANKRD10 PE=1 SV=2	39.83	0.000501153	86.4261	[14] Phospho (ST)	1	SLHLNGS*PSSCIA	353	sp|Q9NXR5|ANR10_HUMAN	549457	450069	417956	504808	454287	577999	450069	504808	0.145099	0.121401	0.16559	0	0	0.672952	0.800599	0.672952	0.800599
ARGSEDDDAQAQHPR	sp|Q6UB99|ANR11_HUMAN	Q6UB99	ANKRD11	Ankyrin repeat domain-containing protein 11 OS=Homo sapiens OX=9606 GN=ANKRD11 PE=1 SV=3	60.54	0.000166722	16.224	[4] Phospho (ST)	1	RAKARGS*EDDDAQ	2374	sp|Q6UB99|ANR11_HUMAN	64.3053	5273.07	1345.8	64.3053	1301.44	64.3053	1345.8	64.3053	1.21831	1.4984	-4.38738	0.333333	0.666667	0.333379	0.527665	0.333379	0.527665
FSLSDDQR	sp|Q6UB99|ANR11_HUMAN	Q6UB99	ANKRD11	Ankyrin repeat domain-containing protein 11 OS=Homo sapiens OX=9606 GN=ANKRD11 PE=1 SV=3	38.65	0.000486808	58.8602	[4] Phospho (ST)	1	DTKFSLS*DDQRDR	834	sp|Q6UB99|ANR11_HUMAN	86108	91383.2	87483.3	80096.8	78184.1	102780	87483.3	80096.8	0.0309816	0.157226	-0.127262	0	0	0.90494	0.947624	0.90494	0.947624
SVSVDIR	sp|Q6UB99|ANR11_HUMAN	Q6UB99	ANKRD11	Ankyrin repeat domain-containing protein 11 OS=Homo sapiens OX=9606 GN=ANKRD11 PE=1 SV=3	42.25	0.000319251	61.6395	[3] Phospho (ST)	1	NLYRSVS*VDIRRT	1792	sp|Q6UB99|ANR11_HUMAN	2399.69	3984.74	3485.87	14577.1	9034.83	8594.2	3485.87	9034.83	0.246331	0.310592	1.37398	0	0	0.00408251	0.0513605	0.00408251	0.0513605
VANSPTMVNLLLGK	sp|Q6UB99|ANR11_HUMAN	Q6UB99	ANKRD11	Ankyrin repeat domain-containing protein 11 OS=Homo sapiens OX=9606 GN=ANKRD11 PE=1 SV=3	73.17	0.000228258	100.235	[4] Phospho (ST)	1	PLKVANS*PTMVNL	276	sp|Q6UB99|ANR11_HUMAN	115999	98293.3	118360	110754	97466.4	5853.09	115999	97466.4	0.0989112	0.800423	-0.251138	0	0	0.26726	0.470821	0.26726	0.470821
DNSPDSTPNHPSQTTPAQK	sp|Q6UB98|ANR12_HUMAN	Q6UB98	ANKRD12	Ankyrin repeat domain-containing protein 12 OS=Homo sapiens OX=9606 GN=ANKRD12 PE=1 SV=3	71.17	0.000216967	27.6539	[3] Phospho (ST)	1	MTARDNS*PDSTPN	149	sp|Q6UB98|ANR12_HUMAN	158275	186523	174229	64039.9	92592.7	130369	174229	92592.7	0.0818661	0.347783	-0.912013	0	0.333333	0.0422915	0.162675	0.0422915	0.162675
APSPAPSSVPLGSEKPSNVSQDR	sp|O75179|ANR17_HUMAN	O75179	ANKRD17	Ankyrin repeat domain-containing protein 17 OS=Homo sapiens OX=9606 GN=ANKRD17 PE=1 SV=3	143.19	0	69.4795	[3] Phospho (ST)	1	SGVRAPS*PAPSSV	2401	sp|O75179|ANR17_HUMAN	4.28701e+06	5.2723e+06	4.79845e+06	3.71305e+06	2.96745e+06	3.17935e+06	4.79845e+06	3.17935e+06	0.102961	0.116898	-0.593833	0	0	0.0837507	0.237994	0.0837507	0.237994
ATNSPKPHMVPR	sp|O75179|ANR17_HUMAN	O75179	ANKRD17	Ankyrin repeat domain-containing protein 17 OS=Homo sapiens OX=9606 GN=ANKRD17 PE=1 SV=3	32.13	0.000747322	31.2546	[4] Phospho (ST)	1	PARATNS*PKPHMV	1940	sp|O75179|ANR17_HUMAN	26006.8	22752.1	15801.9	17989.8	6236.99	3820.72	22752.1	6236.99	0.242226	0.810757	-1.86708	0	0	0.0602843	0.198555	0.0602843	0.198555
ATNSPKPHMVPR	sp|O75179|ANR17_HUMAN	O75179	ANKRD17	Ankyrin repeat domain-containing protein 17 OS=Homo sapiens OX=9606 GN=ANKRD17 PE=1 SV=3	66.02	0.000190949	20.6225	[4] Phospho (ST)|[9] Oxidation (M)	2	PARATNS*PKPHMV,NSPKPHM*VPRHSN	19401945	sp|O75179|ANR17_HUMAN	59440.7	23073.4	20176.3	64181.7	136735	1.02213e+06	23073.4	136735	0.639232	1.30828	2.56709	0	0.166667	0.0496196	0.17866	0.0496196	0.17866
ATVPVAAATAAEGEGSPPAVAAVAGPPAAAEVGGGVGGSSR	sp|O75179|ANR17_HUMAN	O75179	ANKRD17	Ankyrin repeat domain-containing protein 17 OS=Homo sapiens OX=9606 GN=ANKRD17 PE=1 SV=3	163.43	0	95.2872	[2] Phospho (ST)	1	MEKAT*VPVAAA	5	sp|O75179|ANR17_HUMAN	756056	564201	449763	606822	855590	857081	564201	855590	0.262316	0.186323	0.600709	0	0	0.268053	0.471678	0.268053	0.471678
EHYPVSSPSSPSPPAQPGGVSR	sp|O75179|ANR17_HUMAN	O75179	ANKRD17	Ankyrin repeat domain-containing protein 17 OS=Homo sapiens OX=9606 GN=ANKRD17 PE=1 SV=3	115.66	0	64.3668	[10] Phospho (ST)	1	PVSSPSS*PSPPAQ	2045	sp|O75179|ANR17_HUMAN	939447	851793	738257	796193	821928	887846	851793	821928	0.119635	0.0565911	-0.0514907	0	0	0.975862	0.987753	0.975862	0.987753
EHYPVSSPSSPSPPAQPGGVSR	sp|O75179|ANR17_HUMAN	O75179	ANKRD17	Ankyrin repeat domain-containing protein 17 OS=Homo sapiens OX=9606 GN=ANKRD17 PE=1 SV=3	67.86	0.000198689	66.5461	[10] Phospho (ST)|[12] Phospho (ST)	2	PVSSPSS*PSPPAQ,SSPSSPS*PPAQPG	20452047	sp|O75179|ANR17_HUMAN	1.37487e+06	797850	908989	973703	1.83106e+06	7.06433e+06	908989	1.83106e+06	0.29803	1.00219	1.01035	0	0	0.170778	0.360054	0.170778	0.360054
EHYPVSSPSSPSPPAQPGGVSR	sp|O75179|ANR17_HUMAN	O75179	ANKRD17	Ankyrin repeat domain-containing protein 17 OS=Homo sapiens OX=9606 GN=ANKRD17 PE=1 SV=3	22.22	0.00140206	67.7476	[6] Phospho (ST)|[10] Phospho (ST)	2	KEHYPVS*SPSSPS,PVSSPSS*PSPPAQ	20412045	sp|O75179|ANR17_HUMAN	42126.9	47055.3	42811.2	51969.7	58392.9	77157	42811.2	58392.9	0.0606815	0.209383	0.447805	0	0	0.133254	0.310018	0.133254	0.310018
EHYPVSSPSSPSPPAQPGGVSR	sp|O75179|ANR17_HUMAN	O75179	ANKRD17	Ankyrin repeat domain-containing protein 17 OS=Homo sapiens OX=9606 GN=ANKRD17 PE=1 SV=3	36.52	0.000461723	65.2034	[7] Phospho (ST)	1	EHYPVSS*PSSPSP	2042	sp|O75179|ANR17_HUMAN	25030.6	27359.2	28326.3	13114.3	6424.58	258055	27359.2	13114.3	0.0629638	1.5496	-1.06089	0	0.333333	0.970094	0.984593	0.970094	0.984593
EHYPVSSPSSPSPPAQPGGVSR	sp|O75179|ANR17_HUMAN	O75179	ANKRD17	Ankyrin repeat domain-containing protein 17 OS=Homo sapiens OX=9606 GN=ANKRD17 PE=1 SV=3	35.15	0.000535954	65.5884	[9] Phospho (ST)|[10] Phospho (ST)	2	YPVSSPS*SPSPPA,PVSSPSS*PSPPAQ	20442045	sp|O75179|ANR17_HUMAN	120106	342348	82423.6	145377	172130	459316	120106	172130	0.773344	0.67214	0.519199	0	0	0.446995	0.624429	0.446995	0.624429
EHYPVSSPSSPSPPAQPGGVSR	sp|O75179|ANR17_HUMAN	O75179	ANKRD17	Ankyrin repeat domain-containing protein 17 OS=Homo sapiens OX=9606 GN=ANKRD17 PE=1 SV=3	24.01	0.00131197	66.3512	[9] Phospho (ST)|[10] Phospho (ST)|[12] Phospho (ST)	3	YPVSSPS*SPSPPA,PVSSPSS*PSPPAQ,SSPSSPS*PPAQPG	204420452047	sp|O75179|ANR17_HUMAN	185029	146278	116826	122627	300128	519173	146278	300128	0.228998	0.632644	1.03686	0	0	0.194233	0.388781	0.194233	0.388781
KSDNHSPAVVTTTVSSK	sp|O75179|ANR17_HUMAN	O75179	ANKRD17	Ankyrin repeat domain-containing protein 17 OS=Homo sapiens OX=9606 GN=ANKRD17 PE=1 SV=3	55.13	0.000145964	40.6482	[6] Phospho (ST)	1	RKSDNHS*PAVVTT	1639	sp|O75179|ANR17_HUMAN	15716.4	24981.9	28915.7	2608.45	7017.54	11149.9	24981.9	7017.54	0.292043	0.616793	-1.83185	0	0	0.0219371	0.112838	0.0219371	0.112838
LTVASPK	sp|O75179|ANR17_HUMAN	O75179	ANKRD17	Ankyrin repeat domain-containing protein 17 OS=Homo sapiens OX=9606 GN=ANKRD17 PE=1 SV=3	46.39	0.000117495	39.449	[5] Phospho (ST)	1	GKLTVAS*PKRGQK	1709	sp|O75179|ANR17_HUMAN	166842	316864	306325	148859	376809	288758	306325	288758	0.317983	0.42344	-0.0852061	0	0	0.999884	0.999984	0.999884	0.999984
LTVASPKR	sp|O75179|ANR17_HUMAN	O75179	ANKRD17	Ankyrin repeat domain-containing protein 17 OS=Homo sapiens OX=9606 GN=ANKRD17 PE=1 SV=3	34.46	0.000525578	31.9767	[5] Phospho (ST)	1	GKLTVAS*PKRGQK	1709	sp|O75179|ANR17_HUMAN	84552.1	92818.5	92511.7	64423.8	89717.1	240885	92511.7	89717.1	0.0520951	0.724662	-0.0442524	0	0	0.583399	0.734207	0.583399	0.734207
NSPLDCGSASPNK	sp|O75179|ANR17_HUMAN	O75179	ANKRD17	Ankyrin repeat domain-containing protein 17 OS=Homo sapiens OX=9606 GN=ANKRD17 PE=1 SV=3	39.39	0.000495442	39.663	[10] Phospho (ST)	1	LDCGSAS*PNKVAS	2067	sp|O75179|ANR17_HUMAN	499137	721000	646906	786771	1.16669e+06	6.11242e+06	646906	1.16669e+06	0.181493	1.10509	0.85079	0	0	0.111898	0.280328	0.111898	0.280328
NSPLDCGSASPNK	sp|O75179|ANR17_HUMAN	O75179	ANKRD17	Ankyrin repeat domain-containing protein 17 OS=Homo sapiens OX=9606 GN=ANKRD17 PE=1 SV=3	36.25	0.000458589	33.8835	[2] Phospho (ST)|[10] Phospho (ST)	2	GGVSRNS*PLDCGS,LDCGSAS*PNKVAS	20592067	sp|O75179|ANR17_HUMAN	57091.8	82639.2	62191.7	21709.9	10835.8	141581	62191.7	21709.9	0.200872	1.24996	-1.51837	0	0.333333	0.32693	0.521208	0.32693	0.521208
SGPSPLSSPNGK	sp|O75179|ANR17_HUMAN	O75179	ANKRD17	Ankyrin repeat domain-containing protein 17 OS=Homo sapiens OX=9606 GN=ANKRD17 PE=1 SV=3	15.04	0.00176098	38.6941	[1] Phospho (ST)|[8] Phospho (ST)	2	LSTCTKS*GPSPLS,GPSPLSS*PNGKLT	16931700	sp|O75179|ANR17_HUMAN	128789	199069	203773	89119	193245	132598	199069	132598	0.237009	0.378094	-0.586217	0	0	0.364114	0.555045	0.364114	0.555045
HALEHPEPGAEHNGLEGPNDSGRETPQPVPAQ	sp|Q9GZV1|ANKR2_HUMAN	Q9GZV1	ANKRD2	Ankyrin repeat domain-containing protein 2 OS=Homo sapiens OX=9606 GN=ANKRD2 PE=1 SV=3	11.71	0.00183333	64.4158	[21] Phospho (ST)|[25] Phospho (ST)	2	LEGPNDS*GRETPQ,NDSGRET*PQPVPA	349353	sp|Q9GZV1|ANKR2_HUMAN	149990	136238	132696	7340.04	38586.1	31226.8	136238	31226.8	0.0654215	0.635179	-2.12527	0	0.333333	0.00773681	0.0671238	0.00773681	0.0671238
HALEHPEPGAEHNGLEGPNDSGRETPQPVPAQ	sp|Q9GZV1|ANKR2_HUMAN	Q9GZV1	ANKRD2	Ankyrin repeat domain-containing protein 2 OS=Homo sapiens OX=9606 GN=ANKRD2 PE=1 SV=3	45.25	0.000114771	60.4862	[25] Phospho (ST)	1	NDSGRET*PQPVPA	353	sp|Q9GZV1|ANKR2_HUMAN	4.03082e+07	3.39831e+07	3.42984e+07	3.77037e+06	2.67955e+06	1.01257e+06	3.42984e+07	2.67955e+06	0.0984693	0.55835	-3.67808	0	0	0.000393041	0.0192398	0.000393041	0.0192398
KTSLDLR	sp|Q9GZV1|ANKR2_HUMAN	Q9GZV1	ANKRD2	Ankyrin repeat domain-containing protein 2 OS=Homo sapiens OX=9606 GN=ANKRD2 PE=1 SV=3	28.51	0.00107017	44.8732	[3] Phospho (ST)	1	ERVRKTS*LDLRRE	99	sp|Q9GZV1|ANKR2_HUMAN	8.4022e+07	9.72064e+07	109827556	1.92944e+07	1.72163e+07	2.1966e+07	9.72064e+07	1.92944e+07	0.133003	0.122154	-2.33287	0	0	0.000189109	0.0140283	0.000189109	0.0140283
KTSLDLRR	sp|Q9GZV1|ANKR2_HUMAN	Q9GZV1	ANKRD2	Ankyrin repeat domain-containing protein 2 OS=Homo sapiens OX=9606 GN=ANKRD2 PE=1 SV=3	25.43	0.00121247	36.7388	[3] Phospho (ST)	1	ERVRKTS*LDLRRE	99	sp|Q9GZV1|ANKR2_HUMAN	2.2124e+06	2.51103e+06	2.30933e+06	285967	246806	161244	2.30933e+06	246806	0.0649868	0.275717	-3.22602	0	0	6.35e-05	0.00787205	6.35e-05	0.00787205
TSLDLR	sp|Q9GZV1|ANKR2_HUMAN	Q9GZV1	ANKRD2	Ankyrin repeat domain-containing protein 2 OS=Homo sapiens OX=9606 GN=ANKRD2 PE=1 SV=3	32.55	0.000755034	59.3152	[2] Phospho (ST)	1	ERVRKTS*LDLRRE	99	sp|Q9GZV1|ANKR2_HUMAN	629310	565831	535556	81217.3	48225.9	52107.8	565831	52107.8	0.0829377	0.297961	-3.4408	0	0	6.7e-05	0.00791059	6.7e-05	0.00791059
AAEHDLEVASEEEQEREGSENNQPQVEEER	sp|Q9UPS8|ANR26_HUMAN	Q9UPS8	ANKRD26	Ankyrin repeat domain-containing protein 26 OS=Homo sapiens OX=9606 GN=ANKRD26 PE=1 SV=4	12.75	0.00186483	60.6229	[10] Phospho (ST)	1	HDLEVAS*EEEQER	530	sp|Q9UPS8|ANR26_HUMAN	92363.1	66893.7	43294.6	47385.6	68286.6	521528	66893.7	68286.6	0.363466	1.26138	0.0297333	0	0	0.401829	0.588735	0.401829	0.588735
ESVNSPVFGK	sp|Q9UPS8|ANR26_HUMAN	Q9UPS8	ANKRD26	Ankyrin repeat domain-containing protein 26 OS=Homo sapiens OX=9606 GN=ANKRD26 PE=1 SV=4	50.29	0.000129887	62.8427	[5] Phospho (ST)	1	SKESVNS*PVFGKA	631	sp|Q9UPS8|ANR26_HUMAN	27137.7	24629.3	32196	26646.3	23963.4	34331.5	27137.7	26646.3	0.137714	0.190065	-0.0263664	0	0.333333	0.976124	0.987782	0.976124	0.987782
KGESPLGSFAR	sp|Q9UPS8|ANR26_HUMAN	Q9UPS8	ANKRD26	Ankyrin repeat domain-containing protein 26 OS=Homo sapiens OX=9606 GN=ANKRD26 PE=1 SV=4	22.28	0.00140346	68.6378	[4] Phospho (ST)	1	FSKKGES*PLGSFA	11	sp|Q9UPS8|ANR26_HUMAN	533.197	1718.75	3124.24	4460.48	6213.86	357275	1718.75	6213.86	0.72379	1.6567	1.85413	0	0.333333	0.081245	0.23421	0.081245	0.23421
DRSVPNLTEGSLHEPGR	sp|Q96NW4|ANR27_HUMAN	Q96NW4	ANKRD27	Ankyrin repeat domain-containing protein 27 OS=Homo sapiens OX=9606 GN=ANKRD27 PE=1 SV=2	54.33	0.000143349	71.0724	[3] Phospho (ST)	1	IMARDRS*VPNLTE	962	sp|Q96NW4|ANR27_HUMAN	108355	102862	79489	169863	47829.8	119769	102862	119769	0.158182	0.545321	0.219551	0	0	0.935159	0.965098	0.935159	0.965098
RHTVEDAVVSQGPEAAGPLSTPQEVSASR	sp|Q96NW4|ANR27_HUMAN	Q96NW4	ANKRD27	Ankyrin repeat domain-containing protein 27 OS=Homo sapiens OX=9606 GN=ANKRD27 PE=1 SV=2	174.58	0	82.6549	[3] Phospho (ST)	1	RMLRRHT*VEDAVV	1023	sp|Q96NW4|ANR27_HUMAN	595118	588782	527658	181153	88390.9	916101	588782	181153	0.0652988	1.14742	-1.70053	0	0	0.217173	0.41556	0.217173	0.41556
SSEAPVQSPQR	sp|Q96NW4|ANR27_HUMAN	Q96NW4	ANKRD27	Ankyrin repeat domain-containing protein 27 OS=Homo sapiens OX=9606 GN=ANKRD27 PE=1 SV=2	12.57	0.00185821	29.2027	[8] Phospho (ST)	1	SEAPVQS*PQRSVD	634	sp|Q96NW4|ANR27_HUMAN	4996.77	13658.5	12623.9	6651.77	3070.98	29516	12623.9	6651.77	0.45371	1.09686	-0.924353	0	0	0.860123	0.921432	0.860123	0.921432
KASLLPLQR	sp|A6NCL7|AN33B_HUMAN	A6NCL7	ANKRD33B	Ankyrin repeat domain-containing protein 33B OS=Homo sapiens OX=9606 GN=ANKRD33B PE=3 SV=1	29.9	0.000946522	78.0515	[3] Phospho (ST)	1	PAPRKAS*LLPLQR	405	sp|A6NCL7|AN33B_HUMAN	11945	32758.8	28019.6	2914.43	64.3053	64.3053	28019.6	64.3053	0.45003	1.62225	-8.76728	0	0.666667	0.00744342	0.0660496	0.00744342	0.0660496
SVRPGVVVPR	sp|A6NCL7|AN33B_HUMAN	A6NCL7	ANKRD33B	Ankyrin repeat domain-containing protein 33B OS=Homo sapiens OX=9606 GN=ANKRD33B PE=3 SV=1	10.42	0.00179719	64.5911	[1] Phospho (ST)	1	QRLRRRS*VRPGVV	416	sp|A6NCL7|AN33B_HUMAN	5503.53	21567.3	14107.1	64.3053	64.3053	64.3053	14107.1	64.3053	0.585653	0	-7.77727	0	1	1.54e-05	0.00326742	1.54e-05	0.00326742
GHGDICSLLLQHSPALK	sp|Q53RE8|ANR39_HUMAN	Q53RE8	ANKRD39	Ankyrin repeat domain-containing protein 39 OS=Homo sapiens OX=9606 GN=ANKRD39 PE=1 SV=1	42.75	0.000215703	92.9416	[13] Phospho (ST)	1	SLLLQHS*PALKAI	153	sp|Q53RE8|ANR39_HUMAN	1544.59	2024.43	4262.99	5595.05	8241.57	463.922	2024.43	5595.05	0.555768	0.829566	1.46663	0	0	0.854328	0.917992	0.854328	0.917992
TVGGCGALPHGASCPYSQERPGAIGLDGCYSE	sp|Q8NB46|ANR52_HUMAN	Q8NB46	ANKRD52	Serine/threonine-protein phosphatase 6 regulatory ankyrin repeat subunit C OS=Homo sapiens OX=9606 GN=ANKRD52 PE=1 SV=3	26.25	0.00116144	87.8422	[31] Phospho (ST)	1	GLDGCYS*E	1075	sp|Q8NB46|ANR52_HUMAN	179157	201771	273885	170070	177296	22497	201771	170070	0.226655	0.708603	-0.246596	0	0	0.195332	0.389976	0.195332	0.389976
AELKLSR	sp|Q92625|ANS1A_HUMAN	Q92625	ANKS1A	Ankyrin repeat and SAM domain-containing protein 1A OS=Homo sapiens OX=9606 GN=ANKS1A PE=1 SV=4	22.85	0.00141873	43.6236	[6] Phospho (ST)	1	KAELKLS*RSLSKS	620	sp|Q92625|ANS1A_HUMAN	72266.9	80219.4	86621.7	36172.4	21722.2	20282.2	80219.4	21722.2	0.090227	0.337238	-1.88478	0	0	0.00289618	0.0452584	0.00289618	0.0452584
EVDKTPPPQPPLISSMDSISQK	sp|Q92625|ANS1A_HUMAN	Q92625	ANKS1A	Ankyrin repeat and SAM domain-containing protein 1A OS=Homo sapiens OX=9606 GN=ANKS1A PE=1 SV=4	37.58	0.000474158	94.9803	[5] Phospho (ST)	1	TKEVDKT*PPPQPP	318	sp|Q92625|ANS1A_HUMAN	192102	589468	784271	1.24232e+06	770959	95960.5	589468	770959	0.578227	0.819518	0.387241	0	0	0.988728	0.994327	0.988728	0.994327
EVDKTPPPQPPLISSMDSISQK	sp|Q92625|ANS1A_HUMAN	Q92625	ANKS1A	Ankyrin repeat and SAM domain-containing protein 1A OS=Homo sapiens OX=9606 GN=ANKS1A PE=1 SV=4	25.56	0.00121585	83.4022	[5] Phospho (ST)|[16] Oxidation (M)	2	TKEVDKT*PPPQPP,PPLISSM*DSISQK	318329	sp|Q92625|ANS1A_HUMAN	260364	140827	142916	300094	263523	447352	142916	300094	0.37724	0.288763	1.07024	0	0	0.0606751	0.198968	0.0606751	0.198968
HDSLHDPAAPSR	sp|Q92625|ANS1A_HUMAN	Q92625	ANKS1A	Ankyrin repeat and SAM domain-containing protein 1A OS=Homo sapiens OX=9606 GN=ANKS1A PE=1 SV=4	34.54	0.000526732	31.759	[3] Phospho (ST)	1	GRRRHDS*LHDPAA	887	sp|Q92625|ANS1A_HUMAN	63790.7	95716.7	45334	35921.2	10120.2	36722.2	63790.7	35921.2	0.373308	0.548528	-0.82851	0	0	0.0623187	0.201592	0.0623187	0.201592
RHDSLHDPAAPSR	sp|Q92625|ANS1A_HUMAN	Q92625	ANKS1A	Ankyrin repeat and SAM domain-containing protein 1A OS=Homo sapiens OX=9606 GN=ANKS1A PE=1 SV=4	64.53	0.000185391	26.4536	[4] Phospho (ST)	1	GRRRHDS*LHDPAA	887	sp|Q92625|ANS1A_HUMAN	284464	465349	367537	265388	212603	407390	367537	265388	0.2431	0.341349	-0.469787	0	0	0.373802	0.563861	0.373802	0.563861
RLEKSPSFASEWDEIEK	sp|Q92625|ANS1A_HUMAN	Q92625	ANKS1A	Ankyrin repeat and SAM domain-containing protein 1A OS=Homo sapiens OX=9606 GN=ANKS1A PE=1 SV=4	39.73	0.00049995	89.5188	[5] Phospho (ST)	1	KKRLEKS*PSFASE	661	sp|Q92625|ANS1A_HUMAN	60521.8	71793.4	58947.3	105811	31436	168679	60521.8	105811	0.1099	0.673711	0.805964	0	0	0.589034	0.738631	0.589034	0.738631
RRHDSLHDPAAPSR	sp|Q92625|ANS1A_HUMAN	Q92625	ANKS1A	Ankyrin repeat and SAM domain-containing protein 1A OS=Homo sapiens OX=9606 GN=ANKS1A PE=1 SV=4	17.08	0.00151893	22.1549	[5] Phospho (ST)	1	GRRRHDS*LHDPAA	887	sp|Q92625|ANS1A_HUMAN	5563.26	15823.7	17098.8	1727.78	3486.78	30275.2	15823.7	3486.78	0.492975	1.35236	-2.18212	0	0	0.418814	0.603394	0.418814	0.603394
SDSDLLTCSPTEDATMGSR	sp|Q92625|ANS1A_HUMAN	Q92625	ANKS1A	Ankyrin repeat and SAM domain-containing protein 1A OS=Homo sapiens OX=9606 GN=ANKS1A PE=1 SV=4	44.62	0.000226219	82.1037	[9] Phospho (ST)	1	SDLLTCS*PTEDAT	634	sp|Q92625|ANS1A_HUMAN	53679.5	23555.3	31881.7	35086.4	56248.8	81174.9	31881.7	56248.8	0.42769	0.401191	0.819094	0	0.333333	0.217992	0.416437	0.217992	0.416437
SESLSNCSIGK	sp|Q92625|ANS1A_HUMAN	Q92625	ANKS1A	Ankyrin repeat and SAM domain-containing protein 1A OS=Homo sapiens OX=9606 GN=ANKS1A PE=1 SV=4	54.22	0.000142939	45.7015	[3] Phospho (ST)	1	MGSRSES*LSNCSI	647	sp|Q92625|ANS1A_HUMAN	1.27098e+06	1.05786e+06	943877	2.43603e+06	1.65468e+06	1.77938e+06	1.05786e+06	1.77938e+06	0.152199	0.21453	0.750226	0	0	0.0327046	0.141538	0.0327046	0.141538
SESLSNCSIGKK	sp|Q92625|ANS1A_HUMAN	Q92625	ANKS1A	Ankyrin repeat and SAM domain-containing protein 1A OS=Homo sapiens OX=9606 GN=ANKS1A PE=1 SV=4	32.84	0.000760135	36.5491	[3] Phospho (ST)	1	MGSRSES*LSNCSI	647	sp|Q92625|ANS1A_HUMAN	171075	118968	155977	239923	95816.6	226904	155977	226904	0.180333	0.425	0.540746	0	0	0.617236	0.760521	0.617236	0.760521
SLSKSDSDLLTCSPTEDATMGSR	sp|Q92625|ANS1A_HUMAN	Q92625	ANKS1A	Ankyrin repeat and SAM domain-containing protein 1A OS=Homo sapiens OX=9606 GN=ANKS1A PE=1 SV=4	60.85	0.000168152	85.6815	[7] Phospho (ST)	1	SLSKSDS*DLLTCS	628	sp|Q92625|ANS1A_HUMAN	357059	371525	460208	249418	81986	9.04202e+06	371525	249418	0.140935	1.64041	-0.574894	0	0	0.771562	0.866783	0.771562	0.866783
SLSKSDSDLLTCSPTEDATMGSR	sp|Q92625|ANS1A_HUMAN	Q92625	ANKS1A	Ankyrin repeat and SAM domain-containing protein 1A OS=Homo sapiens OX=9606 GN=ANKS1A PE=1 SV=4	76.55	0.00024919	78.4669	[7] Phospho (ST)|[20] Oxidation (M)	2	SLSKSDS*DLLTCS,PTEDATM*GSRSES	628641	sp|Q92625|ANS1A_HUMAN	1.04135e+06	988391	867379	1.58674e+06	1.1534e+06	1.71373e+06	988391	1.58674e+06	0.0923416	0.197888	0.682909	0	0	0.0817143	0.234964	0.0817143	0.234964
SSDQDSTNKEAEAAGVKPAGVRPR	sp|Q92625|ANS1A_HUMAN	Q92625	ANKS1A	Ankyrin repeat and SAM domain-containing protein 1A OS=Homo sapiens OX=9606 GN=ANKS1A PE=1 SV=4	65.38	0.000188786	43.0067	[2] Phospho (ST)	1	MASGRSS*DQDSTN	382	sp|Q92625|ANS1A_HUMAN	667349	640400	574486	1.28036e+06	1.07371e+06	3.1121e+06	640400	1.28036e+06	0.0761458	0.615775	0.999504	0	0	0.0283281	0.129504	0.0283281	0.129504
DVTSPINER	sp|Q6ZW76|ANKS3_HUMAN	Q6ZW76	ANKS3	Ankyrin repeat and SAM domain-containing protein 3 OS=Homo sapiens OX=9606 GN=ANKS3 PE=1 SV=1	29.65	0.000941176	47.4973	[4] Phospho (ST)	1	CCRDVTS*PINERD	320	sp|Q6ZW76|ANKS3_HUMAN	449471	322620	351898	537709	291866	473980	351898	473980	0.177277	0.293621	0.42967	0	0	0.622732	0.764455	0.622732	0.764455
STSPTLTPSPSPK	sp|Q68DC2|ANKS6_HUMAN	Q68DC2	ANKS6	Ankyrin repeat and SAM domain-containing protein 6 OS=Homo sapiens OX=9606 GN=ANKS6 PE=1 SV=2	29.83	0.000944956	54.8596	[3] Phospho (ST)	1	TTSKSTS*PTLTPS	734	sp|Q68DC2|ANKS6_HUMAN	102448	104162	85607.6	337873	224055	126294	102448	224055	0.105265	0.461584	1.12896	0	0	0.0408	0.159462	0.0408	0.159462
AQVPGPLTPEMEAR	sp|Q9H8Y5|ANKZ1_HUMAN	Q9H8Y5	ANKZF1	Ankyrin repeat and zinc finger domain-containing protein 1 OS=Homo sapiens OX=9606 GN=ANKZF1 PE=1 SV=1	26.75	0.00110059	83.9389	[8] Phospho (ST)	1	QVPGPLT*PEMEAR	607	sp|Q9H8Y5|ANKZ1_HUMAN	390325	356521	390556	370587	211582	305797	390325	305797	0.0516549	0.270129	-0.352101	0	0	0.255716	0.45822	0.255716	0.45822
LHSPQTHWK	sp|Q9H8Y5|ANKZ1_HUMAN	Q9H8Y5	ANKZF1	Ankyrin repeat and zinc finger domain-containing protein 1 OS=Homo sapiens OX=9606 GN=ANKZF1 PE=1 SV=1	15.86	0.00154596	31.7909	[3] Phospho (ST)	1	EAVRLHS*PQTHWK	361	sp|Q9H8Y5|ANKZ1_HUMAN	347892	323274	340020	535043	536228	600446	340020	536228	0.0373002	0.0671577	0.657226	0	0	0.0259208	0.123493	0.0259208	0.123493
AESGDSLGSEDR	sp|Q9NQW6|ANLN_HUMAN	Q9NQW6	ANLN	Anillin OS=Homo sapiens OX=9606 GN=ANLN PE=1 SV=2	72.47	0.000224065	27.4654	[6] Phospho (ST)	1	RAESGDS*LGSEDR	661	sp|Q9NQW6|ANLN_HUMAN	64.3053	7907.64	3914.67	6290.26	64.3053	15621.9	3914.67	6290.26	0.989824	1.06891	0.68423	0.333333	0.333333	0.848371	0.914251	0.848371	0.914251
AESGDSLGSEDRDLLYSIDAYR	sp|Q9NQW6|ANLN_HUMAN	Q9NQW6	ANLN	Anillin OS=Homo sapiens OX=9606 GN=ANLN PE=1 SV=2	45.3	0.000114943	97.0628	[6] Phospho (ST)	1	RAESGDS*LGSEDR	661	sp|Q9NQW6|ANLN_HUMAN	99733.3	68850.2	130492	228673	140114	129643	99733.3	140114	0.30916	0.327456	0.490457	0	0	0.111843	0.280328	0.111843	0.280328
ARQPLSEASNQQPLSGGEEK	sp|Q9NQW6|ANLN_HUMAN	Q9NQW6	ANLN	Anillin OS=Homo sapiens OX=9606 GN=ANLN PE=1 SV=2	94.29	0	52.3344	[15] Phospho (ST)	1	SNQQPLS*GGEEKS	54	sp|Q9NQW6|ANLN_HUMAN	104192	48198.7	58818.1	167664	242149	345092	58818.1	242149	0.422425	0.354058	2.04156	0	0	0.00690313	0.0638816	0.00690313	0.0638816
ATSPVKSTTSITDAK	sp|Q9NQW6|ANLN_HUMAN	Q9NQW6	ANLN	Anillin OS=Homo sapiens OX=9606 GN=ANLN PE=1 SV=2	42.92	0.000216521	47.4973	[3] Phospho (ST)	1	SSVKATS*PVKSTT	295	sp|Q9NQW6|ANLN_HUMAN	196025	331947	134141	274141	409380	236465	196025	274141	0.458469	0.296513	0.483879	0	0	0.277429	0.481461	0.277429	0.481461
CSDNTEVEVSNLENK	sp|Q9NQW6|ANLN_HUMAN	Q9NQW6	ANLN	Anillin OS=Homo sapiens OX=9606 GN=ANLN PE=1 SV=2	57.74	0.000155933	70.351	[2] Phospho (ST)	1	PSKKRCS*DNTEVE	72	sp|Q9NQW6|ANLN_HUMAN	37046	34313.2	23703.8	91939.6	73278	114816	34313.2	91939.6	0.22242	0.222878	1.42192	0	0.333333	0.00382403	0.0501195	0.00382403	0.0501195
DKSTTPGGTGIKPFLER	sp|Q9NQW6|ANLN_HUMAN	Q9NQW6	ANLN	Anillin OS=Homo sapiens OX=9606 GN=ANLN PE=1 SV=2	115.21	0	81.9708	[5] Phospho (ST)	1	SKDKSTT*PGGTGI	364	sp|Q9NQW6|ANLN_HUMAN	37635.5	52193.7	44618.6	22342.5	24187.2	78207.2	44618.6	24187.2	0.162467	0.763232	-0.883401	0.166667	0.166667	0.554896	0.712066	0.554896	0.712066
EIEMSVDDDDINSSK	sp|Q9NQW6|ANLN_HUMAN	Q9NQW6	ANLN	Anillin OS=Homo sapiens OX=9606 GN=ANLN PE=1 SV=2	39.85	0.000501354	52.8413	[4] Oxidation (M)|[5] Phospho (ST)	2	VIREIEM*SVDDDD,IREIEMS*VDDDDI	552553	sp|Q9NQW6|ANLN_HUMAN	183.4	1157.58	2236.25	3825.38	20076.6	1198.75	1157.58	3825.38	0.86117	1.22215	1.72449	0	0.333333	0.11782	0.289011	0.11782	0.289011
EIEMSVDDDDINSSK	sp|Q9NQW6|ANLN_HUMAN	Q9NQW6	ANLN	Anillin OS=Homo sapiens OX=9606 GN=ANLN PE=1 SV=2	21.98	0.00139572	74.1074	[5] Phospho (ST)	1	IREIEMS*VDDDDI	553	sp|Q9NQW6|ANLN_HUMAN	73139	58470.5	81330.4	105108	81488.8	39649.9	73139	81488.8	0.163171	0.43955	0.15596	0	0	0.980212	0.98975	0.980212	0.98975
GFTECEMTKSSPLK	sp|Q9NQW6|ANLN_HUMAN	Q9NQW6	ANLN	Anillin OS=Homo sapiens OX=9606 GN=ANLN PE=1 SV=2	77.96	0.000258398	66.4969	[11] Phospho (ST)	1	CEMTKSS*PLKITL	518	sp|Q9NQW6|ANLN_HUMAN	908157	868263	979681	1.5537e+06	1.56748e+06	1.18761e+06	908157	1.5537e+06	0.0614478	0.150008	0.774695	0	0	0.0553667	0.189807	0.0553667	0.189807
GFTECEMTKSSPLK	sp|Q9NQW6|ANLN_HUMAN	Q9NQW6	ANLN	Anillin OS=Homo sapiens OX=9606 GN=ANLN PE=1 SV=2	59.69	0.000163239	49.5362	[7] Oxidation (M)|[11] Phospho (ST)	2	GFTECEM*TKSSPL,CEMTKSS*PLKITL	514518	sp|Q9NQW6|ANLN_HUMAN	523917	661589	828605	868692	1.1983e+06	2.09188e+06	661589	1.1983e+06	0.227266	0.456538	0.856981	0	0	0.0640154	0.204556	0.0640154	0.204556
GNIWSAEK	sp|Q9NQW6|ANLN_HUMAN	Q9NQW6	ANLN	Anillin OS=Homo sapiens OX=9606 GN=ANLN PE=1 SV=2	26.7	0.00117216	74.2243	[5] Phospho (ST)	1	DKGNIWS*AEKGGN	449	sp|Q9NQW6|ANLN_HUMAN	7837.37	4892.16	8495.74	6821.18	2373.38	10858.7	7837.37	6821.18	0.271222	0.634957	-0.200348	0	0.333333	0.656773	0.789179	0.656773	0.789179
KRCSDNTEVEVSNLENK	sp|Q9NQW6|ANLN_HUMAN	Q9NQW6	ANLN	Anillin OS=Homo sapiens OX=9606 GN=ANLN PE=1 SV=2	52.78	0.000137779	54.8596	[4] Phospho (ST)	1	PSKKRCS*DNTEVE	72	sp|Q9NQW6|ANLN_HUMAN	80658.1	86602.6	84917.3	254976	335300	1268.14	84917.3	254976	0.0364472	0.884234	1.58623	0	0	0.726941	0.837742	0.726941	0.837742
NKASPQSEFMPSK	sp|Q9NQW6|ANLN_HUMAN	Q9NQW6	ANLN	Anillin OS=Homo sapiens OX=9606 GN=ANLN PE=1 SV=2	68.99	0.000204248	59.5498	[4] Phospho (ST)	1	QRKNKAS*PQSEFM	792	sp|Q9NQW6|ANLN_HUMAN	941437	596746	557885	1.12978e+06	969718	1.53827e+06	596746	1.12978e+06	0.302168	0.241781	0.920856	0	0	0.0633336	0.203485	0.0633336	0.203485
QDTSSSTTHLAQQLK	sp|Q9NQW6|ANLN_HUMAN	Q9NQW6	ANLN	Anillin OS=Homo sapiens OX=9606 GN=ANLN PE=1 SV=2	48.96	0.000125897	56.8718	[6] Phospho (ST)	1	KQDTSSS*TTHLAQ	419	sp|Q9NQW6|ANLN_HUMAN	64.3053	64.3053	64.3053	64.3053	64.3053	535.767	64.3053	64.3053	0	1.22911	0	1	0.666667	0.300029	0.497427	0.300029	0.497427
QETHCQSTPLKK	sp|Q9NQW6|ANLN_HUMAN	Q9NQW6	ANLN	Anillin OS=Homo sapiens OX=9606 GN=ANLN PE=1 SV=2	23.44	0.00129764	17.4198	[8] Phospho (ST)	1	ETHCQST*PLKKHQ	472	sp|Q9NQW6|ANLN_HUMAN	1772.95	2655.69	2629.78	64.3053	64.3053	8436.55	2629.78	64.3053	0.213506	1.69304	-5.35386	0	0.666667	0.211507	0.409426	0.211507	0.409426
QPLSEASNQQPLSGGEEK	sp|Q9NQW6|ANLN_HUMAN	Q9NQW6	ANLN	Anillin OS=Homo sapiens OX=9606 GN=ANLN PE=1 SV=2	70.19	0.000211282	54.9473	[13] Phospho (ST)	1	SNQQPLS*GGEEKS	54	sp|Q9NQW6|ANLN_HUMAN	356942	328384	341141	978547	673233	456928	341141	673233	0.0418114	0.372843	0.980738	0	0	0.0373722	0.15262	0.0373722	0.15262
RCSDNTEVEVSNLENK	sp|Q9NQW6|ANLN_HUMAN	Q9NQW6	ANLN	Anillin OS=Homo sapiens OX=9606 GN=ANLN PE=1 SV=2	50.06	0.000129216	63.393	[3] Phospho (ST)	1	PSKKRCS*DNTEVE	72	sp|Q9NQW6|ANLN_HUMAN	199258	192697	165896	428063	365061	1.75452e+06	192697	428063	0.0950489	0.923969	1.15149	0	0	0.0353114	0.147732	0.0353114	0.147732
RCSDNTEVEVSNLENKQPVESTSAK	sp|Q9NQW6|ANLN_HUMAN	Q9NQW6	ANLN	Anillin OS=Homo sapiens OX=9606 GN=ANLN PE=1 SV=2	52.05	0.000135593	69.6551	[3] Phospho (ST)	1	PSKKRCS*DNTEVE	72	sp|Q9NQW6|ANLN_HUMAN	39677.6	42295	65483.7	232205	201586	93156	42295	201586	0.288981	0.41596	2.25284	0	0	0.00968664	0.0735627	0.00968664	0.0735627
SCEGQNPELLPKTPISPLK	sp|Q9NQW6|ANLN_HUMAN	Q9NQW6	ANLN	Anillin OS=Homo sapiens OX=9606 GN=ANLN PE=1 SV=2	26.37	0.00116406	93.7252	[13] Phospho (ST)|[16] Phospho (ST)	2	PELLPKT*PISPLK,LPKTPIS*PLKTGV	320323	sp|Q9NQW6|ANLN_HUMAN	64.3053	64.3053	64.3053	64.3053	64.3053	25113.4	64.3053	64.3053	0	1.71881	0	1	0.666667	0.286481	0.488809	0.286481	0.488809
SNIHSSVMASPGGLSAVR	sp|Q9NQW6|ANLN_HUMAN	Q9NQW6	ANLN	Anillin OS=Homo sapiens OX=9606 GN=ANLN PE=1 SV=2	128.69	0	69.0285	[8] Oxidation (M)|[10] Phospho (ST)	2	NIHSSVM*ASPGGL,HSSVMAS*PGGLSA	925927	sp|Q9NQW6|ANLN_HUMAN	162440	201443	155761	167607	257497	161802	162440	167607	0.142443	0.274247	0.0451708	0	0.166667	0.646439	0.781643	0.646439	0.781643
STTPGGTGIKPFLER	sp|Q9NQW6|ANLN_HUMAN	Q9NQW6	ANLN	Anillin OS=Homo sapiens OX=9606 GN=ANLN PE=1 SV=2	53.27	0.000139509	86.8166	[3] Phospho (ST)	1	SKDKSTT*PGGTGI	364	sp|Q9NQW6|ANLN_HUMAN	1171.17	1327.54	4249.03	1592.23	11403.3	85.0012	1327.54	1592.23	0.770758	1.40955	0.26229	0	0.333333	0.715144	0.83005	0.715144	0.83005
TPIITPNTK	sp|Q9NQW6|ANLN_HUMAN	Q9NQW6	ANLN	Anillin OS=Homo sapiens OX=9606 GN=ANLN PE=1 SV=2	20.7	0.00142663	59.4565	[5] Phospho (ST)	1	HRTPIIT*PNTKAI	401	sp|Q9NQW6|ANLN_HUMAN	9654.96	3424.71	5587.99	22351.7	5410.47	27634.7	5587.99	22351.7	0.508349	0.628767	1.99998	0	0	0.120218	0.292391	0.120218	0.292391
TPISPLK	sp|Q9NQW6|ANLN_HUMAN	Q9NQW6	ANLN	Anillin OS=Homo sapiens OX=9606 GN=ANLN PE=1 SV=2	26.8	0.00110189	65.0202	[4] Phospho (ST)	1	LPKTPIS*PLKTGV	323	sp|Q9NQW6|ANLN_HUMAN	1.61264e+06	1.10731e+06	1.2875e+06	3.03302e+06	1.75561e+06	3.53131e+06	1.2875e+06	3.03302e+06	0.19172	0.330254	1.23618	0	0	0.0379528	0.153903	0.0379528	0.153903
TPISPLKTGVSKPIVK	sp|Q9NQW6|ANLN_HUMAN	Q9NQW6	ANLN	Anillin OS=Homo sapiens OX=9606 GN=ANLN PE=1 SV=2	42.28	0.000319523	80.2592	[4] Phospho (ST)	1	LPKTPIS*PLKTGV	323	sp|Q9NQW6|ANLN_HUMAN	19696.5	76357.3	12779.8	11238.7	13085.9	102342	19696.5	13085.9	0.961514	1.23332	-0.589923	0	0.333333	0.919592	0.956062	0.919592	0.956062
TQSLPVTEK	sp|Q9NQW6|ANLN_HUMAN	Q9NQW6	ANLN	Anillin OS=Homo sapiens OX=9606 GN=ANLN PE=1 SV=2	33.2	0.000766023	49.7893	[3] Phospho (ST)	1	GVSKTQS*LPVTEK	485	sp|Q9NQW6|ANLN_HUMAN	130746	225053	192589	156367	118934	122881	192589	122881	0.262097	0.154962	-0.648265	0	0	0.22954	0.429219	0.22954	0.429219
ELVLDNSR	sp|P39687|AN32A_HUMAN	P39687	ANP32A	Acidic leucine-rich nuclear phosphoprotein 32 family member A OS=Homo sapiens OX=9606 GN=ANP32A PE=1 SV=1	26.87	0.00110302	59.5498	[7] Phospho (ST)	1	ELVLDNS*RSNEGK	27	sp|P39687|AN32A_HUMAN	13251.9	4073.36	1563.85	1159.2	2837.43	18959.5	4073.36	2837.43	0.977224	1.28442	-0.521633	0.333333	0.333333	0.913211	0.952291	0.913211	0.952291
KRETDDEGEDD	sp|Q92688|AN32B_HUMAN	Q92688	ANP32B	Acidic leucine-rich nuclear phosphoprotein 32 family member B OS=Homo sapiens OX=9606 GN=ANP32B PE=1 SV=1	35.24	0.000447748	12.0776	[4] Phospho (ST)	1	EKRKRET*DDEGED	244	sp|Q92688|AN32B_HUMAN	488415	193632	159927	455.086	124590	16992.2	193632	16992.2	0.643881	1.42367	-3.51038	0	0	0.0680682	0.211322	0.0680682	0.211322
RKRETDDEGEDD	sp|Q92688|AN32B_HUMAN	Q92688	ANP32B	Acidic leucine-rich nuclear phosphoprotein 32 family member B OS=Homo sapiens OX=9606 GN=ANP32B PE=1 SV=1	18.04	0.00154331	11.8017	[5] Phospho (ST)	1	EKRKRET*DDEGED	244	sp|Q92688|AN32B_HUMAN	4503.66	5020.43	7086.11	97.8499	5336.56	51878.5	5020.43	5336.56	0.246798	1.49201	0.0880984	0	0.333333	0.718485	0.832219	0.718485	0.832219
MEVRWGDKGSTEEGAR	sp|P58335|ANTR2_HUMAN	P58335	ANTXR2	Anthrax toxin receptor 2 OS=Homo sapiens OX=9606 GN=ANTXR2 PE=1 SV=5	12.68	0.00186283	14.7845	[11] Phospho (ST)	1	WGDKGST*EEGARL	402	sp|P58335|ANTR2_HUMAN	41097.3	47442.4	89560.7	14427.9	15940.9	71517	47442.4	15940.9	0.44369	0.95791	-1.57345	0	0.333333	0.176121	0.366526	0.176121	0.366526
DITSDTSGDFR	sp|P04083|ANXA1_HUMAN	P04083	ANXA1	Annexin A1 OS=Homo sapiens OX=9606 GN=ANXA1 PE=1 SV=2	30.27	0.000954806	58.5511	[7] Phospho (ST)	1	DITSDTS*GDFRNA	173	sp|P04083|ANXA1_HUMAN	61519.1	51688.4	58503.5	67615.1	33526.2	13818.8	58503.5	33526.2	0.0879893	0.710246	-0.803233	0	0	0.213509	0.41168	0.213509	0.41168
GGPGSAVSPYPTFNPSSDVAALHK	sp|P04083|ANXA1_HUMAN	P04083	ANXA1	Annexin A1 OS=Homo sapiens OX=9606 GN=ANXA1 PE=1 SV=2	31.78	0.000741473	94.2122	[5] Phospho (ST)	1	SKGGPGS*AVSPYP	34	sp|P04083|ANXA1_HUMAN	265818	228535	164476	216305	146744	142094	228535	146744	0.233402	0.246872	-0.639114	0	0	0.299666	0.497094	0.299666	0.497094
GGPGSAVSPYPTFNPSSDVAALHK	sp|P04083|ANXA1_HUMAN	P04083	ANXA1	Annexin A1 OS=Homo sapiens OX=9606 GN=ANXA1 PE=1 SV=2	124.33	0	93.035	[8] Phospho (ST)	1	GPGSAVS*PYPTFN	37	sp|P04083|ANXA1_HUMAN	1.85965e+06	2.06144e+06	1.89445e+06	2.14315e+06	1.86756e+06	1.27222e+06	1.89445e+06	1.86756e+06	0.0556461	0.252779	-0.0206258	0	0	0.596825	0.744617	0.596825	0.744617
ASSPQGFDVDR	sp|P27216|ANX13_HUMAN	P27216	ANXA13	Annexin A13 OS=Homo sapiens OX=9606 GN=ANXA13 PE=1 SV=3	49.62	0.000128074	56.6389	[3] Phospho (ST)	1	RHAKASS*PQGFDV	10	sp|P27216|ANX13_HUMAN	734001	759139	954544	24459.9	8211.58	689.193	759139	8211.58	0.147972	1.09255	-6.53056	0	0	0.00180474	0.0373381	0.00180474	0.0373381
LSLEGDHSTPPSAYGSVK	sp|P07355|ANXA2_HUMAN	P07355	ANXA2	Annexin A2 OS=Homo sapiens OX=9606 GN=ANXA2 PE=1 SV=2	126.95	0	73.0978	[16] Phospho (ST)	1	PPSAYGS*VKAYTN	26	sp|P07355|ANXA2_HUMAN	2.12493e+06	1.63151e+06	1.96503e+06	407106	617232	133051	1.96503e+06	407106	0.132004	0.629329	-2.27107	0	0	0.0068446	0.0636589	0.0068446	0.0636589
LSLEGDHSTPPSAYGSVK	sp|P07355|ANXA2_HUMAN	P07355	ANXA2	Annexin A2 OS=Homo sapiens OX=9606 GN=ANXA2 PE=1 SV=2	86.56	0	76.5054	[2] Phospho (ST)	1	EILCKLS*LEGDHS	12	sp|P07355|ANXA2_HUMAN	490381	419665	360729	989275	1.0439e+06	952379	419665	989275	0.153249	0.0462703	1.23713	0	0	0.00371769	0.0495451	0.00371769	0.0495451
LSLEGDHSTPPSAYGSVK	sp|P07355|ANXA2_HUMAN	P07355	ANXA2	Annexin A2 OS=Homo sapiens OX=9606 GN=ANXA2 PE=1 SV=2	120.01	0	74.8387	[9] Phospho (ST)	1	LEGDHST*PPSAYG	19	sp|P07355|ANXA2_HUMAN	4.36039e+06	4.2366e+06	4.70155e+06	4.28638e+06	3.96274e+06	4.46536e+06	4.36039e+06	4.28638e+06	0.0543206	0.0601103	-0.0246988	0	0	0.797058	0.883075	0.797058	0.883075
STVHEILCK	sp|P07355|ANXA2_HUMAN	P07355	ANXA2	Annexin A2 OS=Homo sapiens OX=9606 GN=ANXA2 PE=1 SV=2	27.06	0.00103382	85.1633	[N-term] Acetyl (Protein N-term)|[2] Phospho (ST)	2	MS*TVHEIL,MST*VHEILC	2,3	sp|P07355|ANXA2_HUMAN	44718.8	43235.8	55027	95785.9	37403.9	59507.8	44718.8	59507.8	0.134755	0.458901	0.412197	0	0	0.454448	0.629857	0.454448	0.629857
STVHEILCKLSLEGDHSTPPSAYGSVK	sp|P07355|ANXA2_HUMAN	P07355	ANXA2	Annexin A2 OS=Homo sapiens OX=9606 GN=ANXA2 PE=1 SV=2	85.03	0.000309789	96.3786	[N-term] Acetyl (Protein N-term)|[11] Phospho (ST)	2	MS*TVHEIL,EILCKLS*LEGDHS	2,12	sp|P07355|ANXA2_HUMAN	774492	787547	851307	1.93585e+06	1.9871e+06	1.24524e+06	787547	1.93585e+06	0.0510935	0.240496	1.29753	0	0	0.01353	0.0873403	0.01353	0.0873403
AASGFNAMEDAQTLR	sp|P09525|ANXA4_HUMAN	P09525	ANXA4	Annexin A4 OS=Homo sapiens OX=9606 GN=ANXA4 PE=1 SV=4	76.64	0.000249875	88.7701	[3] Phospho (ST)	1	GTVKAAS*GFNAME	12	sp|P09525|ANXA4_HUMAN	297836	268229	264257	347088	171696	241070	268229	241070	0.0662909	0.348745	-0.154013	0	0	0.611608	0.756462	0.611608	0.756462
SKTEEDILR	sp|Q63HQ0|AP1AR_HUMAN	Q63HQ0	AP1AR	AP-1 complex-associated regulatory protein OS=Homo sapiens OX=9606 GN=AP1AR PE=1 SV=1	44.61	0.000226116	50.3119	[3] Phospho (ST)	1	MRERSKT*EEDILR	228	sp|Q63HQ0|AP1AR_HUMAN	160441	261657	249717	284974	99519.8	153239	249717	153239	0.247004	0.532363	-0.704511	0	0	0.413341	0.599044	0.413341	0.599044
EGDELEDNGKNFYESDDDQKEK	sp|O00203|AP3B1_HUMAN	O00203	AP3B1	AP-3 complex subunit beta-1 OS=Homo sapiens OX=9606 GN=AP3B1 PE=1 SV=3	121.61	0	57.3903	[15] Phospho (ST)	1	GKNFYES*DDDQKE	276	sp|O00203|AP3B1_HUMAN	1.60115e+07	2.04732e+07	1.9957e+07	1.57324e+07	1.57093e+07	8.15995e+06	1.9957e+07	1.57093e+07	0.129725	0.330691	-0.345277	0	0	0.178156	0.368832	0.178156	0.368832
EWTPAGK	sp|O00203|AP3B1_HUMAN	O00203	AP3B1	AP-3 complex subunit beta-1 OS=Homo sapiens OX=9606 GN=AP3B1 PE=1 SV=3	16.12	0.00149361	40.6482	[3] Phospho (ST)	1	ELAKEWT*PAGKAK	661	sp|O00203|AP3B1_HUMAN	64.3053	64.3053	64.3053	4789.14	64.3053	1334.14	64.3053	1334.14	0	1.18553	4.37483	1	0.333333	0.0694379	0.213936	0.0694379	0.213936
IFLAQKPAPLLESPFKDR	sp|O00203|AP3B1_HUMAN	O00203	AP3B1	AP-3 complex subunit beta-1 OS=Homo sapiens OX=9606 GN=AP3B1 PE=1 SV=3	40.16	0.000404408	95.5286	[13] Phospho (ST)	1	PAPLLES*PFKDRD	609	sp|O00203|AP3B1_HUMAN	92338.8	108521	106798	99304.4	27705.2	89197	106798	89197	0.0866591	0.537694	-0.259818	0	0	0.251903	0.453942	0.251903	0.453942
NFYESDDDQKEK	sp|O00203|AP3B1_HUMAN	O00203	AP3B1	AP-3 complex subunit beta-1 OS=Homo sapiens OX=9606 GN=AP3B1 PE=1 SV=3	49.34	0.000127243	35.4877	[5] Phospho (ST)	1	GKNFYES*DDDQKE	276	sp|O00203|AP3B1_HUMAN	3.58521e+07	3.69298e+07	3.58075e+07	3.47664e+07	1.84096e+07	1.81037e+07	3.58521e+07	1.84096e+07	0.0175557	0.401228	-0.961598	0	0	0.105934	0.271728	0.105934	0.271728
TKQDRTPLTK	sp|O00203|AP3B1_HUMAN	O00203	AP3B1	AP-3 complex subunit beta-1 OS=Homo sapiens OX=9606 GN=AP3B1 PE=1 SV=3	22.24	0.00140243	16.9115	[6] Phospho (ST)	1	KTKQDRT*PLTKDV	810	sp|O00203|AP3B1_HUMAN	4050.35	7238.51	5184.33	842.086	434.155	2972.73	5184.33	842.086	0.294307	0.962514	-2.62212	0	0	0.0218543	0.112689	0.0218543	0.112689
AFYGSEEDEAK	sp|Q13367|AP3B2_HUMAN	Q13367	AP3B2	AP-3 complex subunit beta-2 OS=Homo sapiens OX=9606 GN=AP3B2 PE=1 SV=2	20.1	0.00147568	50.0161	[5] Phospho (ST)	1	EKAFYGS*EEDEAK	272	sp|Q13367|AP3B2_HUMAN	301884	573086	580926	106370	22052.2	3214.64	573086	22052.2	0.327407	1.25191	-4.69975	0	0	0.013395	0.0869054	0.013395	0.0869054
AFYGSEEDEAKGAGSEETAAAAAPSR	sp|Q13367|AP3B2_HUMAN	Q13367	AP3B2	AP-3 complex subunit beta-2 OS=Homo sapiens OX=9606 GN=AP3B2 PE=1 SV=2	60.88	0.000168294	66.6448	[5] Phospho (ST)	1	EKAFYGS*EEDEAK	272	sp|Q13367|AP3B2_HUMAN	498443	432723	445862	100885	71990.4	21075.3	445862	71990.4	0.075765	0.625025	-2.63072	0	0	0.00317785	0.0469209	0.00317785	0.0469209
HRPSEADEEELAR	sp|O14617|AP3D1_HUMAN	O14617	AP3D1	AP-3 complex subunit delta-1 OS=Homo sapiens OX=9606 GN=AP3D1 PE=1 SV=1	55.16	0.000146071	34.7442	[4] Phospho (ST)	1	RPKHRPS*EADEEE	658	sp|O14617|AP3D1_HUMAN	1.58469e+06	2.45009e+06	2.26265e+06	647598	242573	574690	2.26265e+06	574690	0.216887	0.442147	-1.97716	0	0	0.00417865	0.0521596	0.00417865	0.0521596
KQEQANNPFYIKSSPSPQK	sp|O14617|AP3D1_HUMAN	O14617	AP3D1	AP-3 complex subunit delta-1 OS=Homo sapiens OX=9606 GN=AP3D1 PE=1 SV=1	17.22	0.00152142	72.6938	[14] Phospho (ST)|[16] Phospho (ST)	2	PFYIKSS*PSPQKR,YIKSSPS*PQKRYQ	686688	sp|O14617|AP3D1_HUMAN	24985.9	24548.1	32567.3	46406.8	56083.9	5125.23	24985.9	46406.8	0.164753	0.754447	0.893222	0	0	0.848661	0.914416	0.848661	0.914416
NTETSKSPEKDVPMVEK	sp|O14617|AP3D1_HUMAN	O14617	AP3D1	AP-3 complex subunit delta-1 OS=Homo sapiens OX=9606 GN=AP3D1 PE=1 SV=1	101.42	0	54.2584	[7] Phospho (ST)	1	NTETSKS*PEKDVP	829	sp|O14617|AP3D1_HUMAN	1.09175e+07	8.71218e+06	9.39033e+06	7.32386e+06	4.721e+06	420056	9.39033e+06	4.721e+06	0.116774	0.839123	-0.992084	0	0	0.128557	0.303772	0.128557	0.303772
NTETSKSPEKDVPMVEK	sp|O14617|AP3D1_HUMAN	O14617	AP3D1	AP-3 complex subunit delta-1 OS=Homo sapiens OX=9606 GN=AP3D1 PE=1 SV=1	162.61	0	47.7818	[7] Phospho (ST)|[14] Oxidation (M)	2	NTETSKS*PEKDVP,PEKDVPM*VEKKSK	829836	sp|O14617|AP3D1_HUMAN	1.80907e+07	1.59018e+07	1.67329e+07	2.0126e+07	1.16886e+07	1.02285e+07	1.67329e+07	1.16886e+07	0.0653479	0.381245	-0.517581	0	0	0.377078	0.56686	0.377078	0.56686
NTETSKSPEKDVPMVEKK	sp|O14617|AP3D1_HUMAN	O14617	AP3D1	AP-3 complex subunit delta-1 OS=Homo sapiens OX=9606 GN=AP3D1 PE=1 SV=1	55.79	0.00014817	46.2791	[7] Phospho (ST)	1	NTETSKS*PEKDVP	829	sp|O14617|AP3D1_HUMAN	634931	1.11185e+06	934440	106104	319871	241254	934440	241254	0.269709	0.486139	-1.95355	0	0	0.00698081	0.0640944	0.00698081	0.0640944
NTETSKSPEKDVPMVEKK	sp|O14617|AP3D1_HUMAN	O14617	AP3D1	AP-3 complex subunit delta-1 OS=Homo sapiens OX=9606 GN=AP3D1 PE=1 SV=1	17.44	0.00152634	37.9342	[7] Phospho (ST)|[14] Oxidation (M)	2	NTETSKS*PEKDVP,PEKDVPM*VEKKSK	829836	sp|O14617|AP3D1_HUMAN	101799	162319	109782	72956.5	71682.7	3867.41	109782	71682.7	0.263813	0.79847	-0.614942	0	0	0.131705	0.307939	0.131705	0.307939
SPEKDVPMVEK	sp|O14617|AP3D1_HUMAN	O14617	AP3D1	AP-3 complex subunit delta-1 OS=Homo sapiens OX=9606 GN=AP3D1 PE=1 SV=1	31.39	0.000897593	42.3346	[1] Phospho (ST)|[8] Oxidation (M)	2	NTETSKS*PEKDVP,PEKDVPM*VEKKSK	829836	sp|O14617|AP3D1_HUMAN	42381.7	24523.5	19632.5	20670.3	7246.63	17493.1	24523.5	17493.1	0.415127	0.463458	-0.487384	0	0	0.120002	0.292036	0.120002	0.292036
VAPSSAASR	sp|O00189|AP4M1_HUMAN	O00189	AP4M1	AP-4 complex subunit mu-1 OS=Homo sapiens OX=9606 GN=AP4M1 PE=1 SV=2	19.24	0.00157868	33.2041	[8] Phospho (ST)	1	APSSAAS*RPVLSS	171	sp|O00189|AP4M1_HUMAN	40079	104988	72244	4543.19	3986.96	9814.82	72244	4543.19	0.448045	0.525952	-3.9911	0	0	0.000736959	0.0254825	0.000736959	0.0254825
SASQDCIETTPGAQEGK	sp|Q99767|APBA2_HUMAN	Q99767	APBA2	Amyloid-beta A4 precursor protein-binding family A member 2 OS=Homo sapiens OX=9606 GN=APBA2 PE=1 SV=3	112.16	0	46.3354	[3] Phospho (ST)	1	RMPRSAS*QDCIET	480	sp|Q99767|APBA2_HUMAN	1.36619e+06	1.34318e+06	1.20364e+06	2.19139e+06	3.54943e+06	3.3478e+06	1.34318e+06	3.3478e+06	0.0674392	0.241893	1.31756	0	0	0.00897415	0.0711422	0.00897415	0.0711422
SASQDCIETTPGAQEGKK	sp|Q99767|APBA2_HUMAN	Q99767	APBA2	Amyloid-beta A4 precursor protein-binding family A member 2 OS=Homo sapiens OX=9606 GN=APBA2 PE=1 SV=3	82.56	0.000289939	39.3903	[3] Phospho (ST)	1	RMPRSAS*QDCIET	480	sp|Q99767|APBA2_HUMAN	1.17547e+06	1.93753e+06	1.3855e+06	1.91476e+06	3.49485e+06	2.01181e+06	1.3855e+06	2.01181e+06	0.262498	0.357982	0.538089	0	0	0.117604	0.288727	0.117604	0.288727
SPSGPPAMDLEGPR	sp|O96018|APBA3_HUMAN	O96018	APBA3	Amyloid-beta A4 precursor protein-binding family A member 3 OS=Homo sapiens OX=9606 GN=APBA3 PE=1 SV=1	44.77	0.000226937	81.7728	[3] Phospho (ST)	1	TISRSPS*GPPAMD	11	sp|O96018|APBA3_HUMAN	332063	383307	378051	316105	143457	134225	378051	143457	0.077348	0.517597	-1.39796	0	0	0.0557665	0.190444	0.0557665	0.190444
RSSDTSGSPATPLK	sp|Q7Z5R6|AB1IP_HUMAN	Q7Z5R6	APBB1IP	Amyloid beta A4 precursor protein-binding family B member 1-interacting protein OS=Homo sapiens OX=9606 GN=APBB1IP PE=1 SV=1	44.91	0.000227739	38.4473	[3] Phospho (ST)	1	PPVRRSS*DTSGSP	526	sp|Q7Z5R6|AB1IP_HUMAN	2.25519e+07	2.83196e+07	2.77495e+07	3.04893e+06	3.6877e+06	3.70075e+06	2.77495e+07	3.6877e+06	0.121273	0.107101	-2.91167	0	0	5.09e-05	0.00681435	5.09e-05	0.00681435
SSDTSGSPATPLK	sp|Q7Z5R6|AB1IP_HUMAN	Q7Z5R6	APBB1IP	Amyloid beta A4 precursor protein-binding family B member 1-interacting protein OS=Homo sapiens OX=9606 GN=APBB1IP PE=1 SV=1	69.16	0.000205086	46.481	[2] Phospho (ST)	1	PPVRRSS*DTSGSP	526	sp|Q7Z5R6|AB1IP_HUMAN	2.07857e+06	3.79895e+06	3.10024e+06	366888	391467	498910	3.10024e+06	391467	0.289123	0.167534	-2.98542	0	0	0.000239181	0.0152869	0.000239181	0.0152869
SSDTSGSPATPLK	sp|Q7Z5R6|AB1IP_HUMAN	Q7Z5R6	APBB1IP	Amyloid beta A4 precursor protein-binding family B member 1-interacting protein OS=Homo sapiens OX=9606 GN=APBB1IP PE=1 SV=1	33.11	0.000764786	43.3319	[7] Phospho (ST)	1	SSDTSGS*PATPLK	531	sp|Q7Z5R6|AB1IP_HUMAN	65638.2	57433	51260.6	494.549	1297.31	54617.1	57433	1297.31	0.12412	1.64966	-5.46828	0	0	0.0604945	0.19879	0.0604945	0.19879
KGSLSSVTPSPTPENEK	sp|Q92870|APBB2_HUMAN	Q92870	APBB2	Amyloid-beta A4 precursor protein-binding family B member 2 OS=Homo sapiens OX=9606 GN=APBB2 PE=1 SV=3	59.1	0.000160953	55.8175	[3] Phospho (ST)	1	QGSRKGS*LSSVTP	334	sp|Q92870|APBB2_HUMAN	78533.6	78410.6	70402.9	170166	115515	121512	78410.6	121512	0.0614808	0.220821	0.631973	0	0	0.0288868	0.130937	0.0288868	0.130937
NAPHPDDDDSCSINSDPEAK	sp|Q92870|APBB2_HUMAN	Q92870	APBB2	Amyloid-beta A4 precursor protein-binding family B member 2 OS=Homo sapiens OX=9606 GN=APBB2 PE=1 SV=3	88.87	0	39.706	[12] Phospho (ST)	1	DDDDSCS*INSDPE	409	sp|Q92870|APBB2_HUMAN	162229	201407	115749	266598	263482	256625	162229	263482	0.26835	0.019455	0.699679	0	0.333333	0.0526344	0.184475	0.0526344	0.184475
NAPHPDDDDSCSINSDPEAK	sp|Q92870|APBB2_HUMAN	Q92870	APBB2	Amyloid-beta A4 precursor protein-binding family B member 2 OS=Homo sapiens OX=9606 GN=APBB2 PE=1 SV=3	73.5	0.000230362	39.0612	[12] Phospho (ST)|[15] Phospho (ST)	2	DDDDSCS*INSDPE,DSCSINS*DPEAKC	409412	sp|Q92870|APBB2_HUMAN	69851.1	115436	116588	23853.7	129180	314647	115436	129180	0.264916	0.944398	0.162293	0	0.333333	0.988366	0.994149	0.988366	0.994149
NAPHPDDDDSCSINSDPEAK	sp|Q92870|APBB2_HUMAN	Q92870	APBB2	Amyloid-beta A4 precursor protein-binding family B member 2 OS=Homo sapiens OX=9606 GN=APBB2 PE=1 SV=3	80.23	0.000273373	39.0419	[15] Phospho (ST)	1	DSCSINS*DPEAKC	412	sp|Q92870|APBB2_HUMAN	311254	347702	397777	424577	768738	388433	347702	424577	0.123325	0.398132	0.288175	0	0	0.204393	0.400525	0.204393	0.400525
NLSPTAVINITSEK	sp|Q92870|APBB2_HUMAN	Q92870	APBB2	Amyloid-beta A4 precursor protein-binding family B member 2 OS=Homo sapiens OX=9606 GN=APBB2 PE=1 SV=3	59.73	0.000163372	96.3296	[3] Phospho (ST)	1	DPNKNLS*PTAVIN	123	sp|Q92870|APBB2_HUMAN	148290	158205	143684	530385	348866	814490	148290	530385	0.0494499	0.415686	1.83862	0	0	0.00363648	0.0490344	0.00363648	0.0490344
AVEFSSGAKSPSK	sp|P25054|APC_HUMAN	P25054	APC	Adenomatous polyposis coli protein OS=Homo sapiens OX=9606 GN=APC PE=1 SV=2	56.87	0.000152579	37.1569	[10] Phospho (ST)	1	FSSGAKS*PSKSGA	1360	sp|P25054|APC_HUMAN	1.76858e+06	1.75121e+06	1.23265e+06	1.06584e+06	805355	18321.9	1.75121e+06	805355	0.192236	0.865888	-1.12066	0	0	0.157905	0.343905	0.157905	0.343905
DIQRPDSEHGLSPDSENFDWK	sp|P25054|APC_HUMAN	P25054	APC	Adenomatous polyposis coli protein OS=Homo sapiens OX=9606 GN=APC PE=1 SV=2	28.08	0.00105972	85.9736	[12] Phospho (ST)	1	DSEHGLS*PDSENF	2093	sp|P25054|APC_HUMAN	597238	544507	622304	589015	536164	1.4566e+06	597238	589015	0.0675322	0.600553	-0.0200007	0	0	0.422473	0.605908	0.422473	0.605908
EAPSPTLR	sp|P25054|APC_HUMAN	P25054	APC	Adenomatous polyposis coli protein OS=Homo sapiens OX=9606 GN=APC PE=1 SV=2	27.81	0.00105334	42.1976	[4] Phospho (ST)	1	FIKEAPS*PTLRRK	2449	sp|P25054|APC_HUMAN	354233	299703	328849	274185	261803	511513	328849	274185	0.0832942	0.40305	-0.262273	0	0	0.948297	0.973057	0.948297	0.973057
FQPHFGQQECVSPYR	sp|P25054|APC_HUMAN	P25054	APC	Adenomatous polyposis coli protein OS=Homo sapiens OX=9606 GN=APC PE=1 SV=2	17.6	0.00153102	76.1413	[12] Phospho (ST)	1	GQQECVS*PYRSRG	1100	sp|P25054|APC_HUMAN	37183	42900.9	52283	11859	14201.3	18728.4	42900.9	14201.3	0.172786	0.233907	-1.59499	0	0.333333	0.00275352	0.0441113	0.00275352	0.0441113
HSSSLPR	sp|P25054|APC_HUMAN	P25054	APC	Adenomatous polyposis coli protein OS=Homo sapiens OX=9606 GN=APC PE=1 SV=2	12.65	0.00186157	21.1128	[4] Phospho (ST)	1	HSKHSSS*LPRVST	2557	sp|P25054|APC_HUMAN	48001.2	113981	122394	19945.2	15387.8	27718.7	113981	19945.2	0.42978	0.29666	-2.51468	0	0	0.00565155	0.059198	0.00565155	0.059198
KKPTSPVKPIPQNTEYR	sp|P25054|APC_HUMAN	P25054	APC	Adenomatous polyposis coli protein OS=Homo sapiens OX=9606 GN=APC PE=1 SV=2	80.74	0.000277624	44.9965	[5] Phospho (ST)	1	KKKKPTS*PVKPIP	1774	sp|P25054|APC_HUMAN	66457.2	807253	1.12801e+06	632702	874597	628161	807253	632702	0.815974	0.198066	-0.351494	0	0.111111	0.483999	0.654749	0.483999	0.654749
KPTSPVKPIPQNTEYR	sp|P25054|APC_HUMAN	P25054	APC	Adenomatous polyposis coli protein OS=Homo sapiens OX=9606 GN=APC PE=1 SV=2	41.3	0.000311688	52.5996	[4] Phospho (ST)	1	KKKKPTS*PVKPIP	1774	sp|P25054|APC_HUMAN	425806	373876	461606	469182	316013	459814	425806	459814	0.104921	0.206879	0.110857	0	0	0.905981	0.948221	0.905981	0.948221
RHSGSYLVTSV	sp|P25054|APC_HUMAN	P25054	APC	Adenomatous polyposis coli protein OS=Homo sapiens OX=9606 GN=APC PE=1 SV=2	27.92	0.00105644	72.7937	[5] Phospho (ST)	1	PKRHSGS*YLVTSV	2837	sp|P25054|APC_HUMAN	806909	707576	665779	687159	636061	478561	707576	636061	0.0997498	0.181034	-0.153719	0	0	0.345685	0.538514	0.345685	0.538514
SEKDRSLER	sp|P25054|APC_HUMAN	P25054	APC	Adenomatous polyposis coli protein OS=Homo sapiens OX=9606 GN=APC PE=1 SV=2	30.4	0.000876913	14.982	[6] Phospho (ST)	1	RSEKDRS*LERERG	851	sp|P25054|APC_HUMAN	62376	126979	114015	307.87	25453.4	59138.4	114015	25453.4	0.337968	1.04306	-2.1633	0	0.166667	0.124847	0.298866	0.124847	0.298866
SELSPVAR	sp|P25054|APC_HUMAN	P25054	APC	Adenomatous polyposis coli protein OS=Homo sapiens OX=9606 GN=APC PE=1 SV=2	24.58	0.00133184	48.8765	[4] Phospho (ST)	1	SVKSELS*PVARQT	2283	sp|P25054|APC_HUMAN	209245	211601	139819	83434.4	69603.4	274283	209245	83434.4	0.218208	0.803061	-1.32648	0	0	0.319745	0.514997	0.319745	0.514997
SGRSPTGNTPPVIDSVSEK	sp|P25054|APC_HUMAN	P25054	APC	Adenomatous polyposis coli protein OS=Homo sapiens OX=9606 GN=APC PE=1 SV=2	24.39	0.00132598	70.8818	[6] Phospho (ST)	1	RSGRSPT*GNTPPV	2676	sp|P25054|APC_HUMAN	300778	258532	243715	259092	189062	269577	258532	259092	0.110618	0.182969	0.003126	0	0	0.562364	0.718212	0.562364	0.718212
SHSESPSRLPINR	sp|P25054|APC_HUMAN	P25054	APC	Adenomatous polyposis coli protein OS=Homo sapiens OX=9606 GN=APC PE=1 SV=2	16.18	0.00149522	55.1216	[3] Phospho (ST)|[5] Phospho (ST)	2	DIARSHS*ESPSRL,ARSHSES*PSRLPI	25332535	sp|P25054|APC_HUMAN	39962.5	18372	14958.3	7113.58	22145.8	698681	18372	22145.8	0.554974	1.62792	0.269525	0	0	0.548525	0.706987	0.548525	0.706987
SKTPPPPPQTAQTK	sp|P25054|APC_HUMAN	P25054	APC	Adenomatous polyposis coli protein OS=Homo sapiens OX=9606 GN=APC PE=1 SV=2	55.97	0.000148987	28.5978	[3] Phospho (ST)	1	PPSRSKT*PPPPPQ	1438	sp|P25054|APC_HUMAN	1.79114e+06	2.46804e+06	2.66614e+06	1.28568e+06	1.76822e+06	3.36672e+06	2.46804e+06	1.76822e+06	0.198755	0.508945	-0.481065	0	0	0.657062	0.78927	0.657062	0.78927
SPTGNTPPVIDSVSEK	sp|P25054|APC_HUMAN	P25054	APC	Adenomatous polyposis coli protein OS=Homo sapiens OX=9606 GN=APC PE=1 SV=2	28.53	0.000994036	78.0515	[1] Phospho (ST)	1	NPRSGRS*PTGNTP	2674	sp|P25054|APC_HUMAN	45984.9	52335.1	69702.8	77485.1	54686.6	15673.1	52335.1	54686.6	0.219221	0.634282	0.0634078	0	0	0.522702	0.686997	0.522702	0.686997
YSDEQLNSGRQSPSQNER	sp|P25054|APC_HUMAN	P25054	APC	Adenomatous polyposis coli protein OS=Homo sapiens OX=9606 GN=APC PE=1 SV=2	37.72	0.000476054	34.4505	[12] Phospho (ST)	1	LNSGRQS*PSQNER	1042	sp|P25054|APC_HUMAN	409930	418365	607972	403357	381894	155194	418365	381894	0.233907	0.438623	-0.13159	0	0	0.186966	0.379836	0.186966	0.379836
ALDVSASDDEIAR	sp|P13798|ACPH_HUMAN	P13798	APEH	Acylamino-acid-releasing enzyme OS=Homo sapiens OX=9606 GN=APEH PE=1 SV=4	60.5	0.000166472	73.0088	[7] Phospho (ST)	1	ALDVSAS*DDEIAR	187	sp|P13798|ACPH_HUMAN	836683	704203	751854	1.87121e+06	2.0513e+06	917001	751854	1.87121e+06	0.0878043	0.377882	1.31545	0	0	0.0473956	0.174263	0.0473956	0.174263
ASEDTTSGSPPKK	sp|Q9BZZ5|API5_HUMAN	Q9BZZ5	API5	Apoptosis inhibitor 5 OS=Homo sapiens OX=9606 GN=API5 PE=1 SV=3	41.56	0.000313545	16.4636	[9] Phospho (ST)	1	EDTTSGS*PPKKSS	464	sp|Q9BZZ5|API5_HUMAN	156479	53965	168946	281364	70091.9	166679	156479	166679	0.498912	0.612381	0.0911006	0	0	0.59258	0.741392	0.59258	0.741392
RASEDTTSGSPPKK	sp|Q9BZZ5|API5_HUMAN	Q9BZZ5	API5	Apoptosis inhibitor 5 OS=Homo sapiens OX=9606 GN=API5 PE=1 SV=3	104.87	0	14.6039	[10] Phospho (ST)	1	EDTTSGS*PPKKSS	464	sp|Q9BZZ5|API5_HUMAN	208758	165166	209562	459959	97798	328176	208758	328176	0.130612	0.620714	0.652639	0.222222	0.222222	0.604658	0.751224	0.604658	0.751224
IIGSVSKEEEEEDEEEEEEEDEEEDYDVYK	sp|Q06481|APLP2_HUMAN	Q06481	APLP2	Amyloid-like protein 2 OS=Homo sapiens OX=9606 GN=APLP2 PE=1 SV=2	82.06	0.000285878	83.4022	[4] Phospho (ST)|[6] Phospho (ST)	2	QTKIIGS*VSKEEE,KIIGSVS*KEEEEE	211213	sp|Q06481|APLP2_HUMAN	802052	630256	646076	173841	106871	215851	646076	173841	0.137053	0.33207	-1.89393	0	0.333333	0.0013301	0.0330663	0.0013301	0.0330663
IIGSVSKEEEEEDEEEEEEEDEEEDYDVYK	sp|Q06481|APLP2_HUMAN	Q06481	APLP2	Amyloid-like protein 2 OS=Homo sapiens OX=9606 GN=APLP2 PE=1 SV=2	97.66	0	84.4253	[6] Phospho (ST)	1	KIIGSVS*KEEEEE	213	sp|Q06481|APLP2_HUMAN	474693	861530	667837	152739	40872.5	63813.8	667837	63813.8	0.28954	0.688599	-3.38755	0	0	0.00184137	0.0379158	0.00184137	0.0379158
VTEPISAESGEQVER	sp|O14791|APOL1_HUMAN	O14791	APOL1	Apolipoprotein L1 OS=Homo sapiens OX=9606 GN=APOL1 PE=1 SV=5	49.01	0.000126135	59.0664	[9] Phospho (ST)	1	EPISAES*GEQVER	314	sp|O14791|APOL1_HUMAN	33053	24437.7	42448.1	35382.5	29546.5	37659.8	33053	35382.5	0.270407	0.122374	0.0982555	0	0	0.841576	0.910487	0.841576	0.910487
ISAEGGEQVER	sp|Q9BQE5|APOL2_HUMAN	Q9BQE5	APOL2	Apolipoprotein L2 OS=Homo sapiens OX=9606 GN=APOL2 PE=1 SV=1	66.88	0.000194137	37.3391	[2] Phospho (ST)	1	HIIGRIS*AEGGEQ	250	sp|Q9BQE5|APOL2_HUMAN	261750	193511	129504	321499	267983	362889	193511	321499	0.339286	0.149883	0.732399	0	0	0.0842568	0.238786	0.0842568	0.238786
LIAASSRPNQASSEGQFVVLSSSQSEESDLGEGGK	sp|Q9UKG1|DP13A_HUMAN	Q9UKG1	APPL1	DCC-interacting protein 13-alpha OS=Homo sapiens OX=9606 GN=APPL1 PE=1 SV=1	109.01	0	89.6437	[23] Phospho (ST)	1	FVVLSSS*QSEESD	691	sp|Q9UKG1|DP13A_HUMAN	131.259	5619.32	1748.92	33975.5	9361.58	481594	1748.92	33975.5	1.12809	1.51919	4.27996	0	0	0.0314975	0.138291	0.0314975	0.138291
LIAASSRPNQASSEGQFVVLSSSQSEESDLGEGGK	sp|Q9UKG1|DP13A_HUMAN	Q9UKG1	APPL1	DCC-interacting protein 13-alpha OS=Homo sapiens OX=9606 GN=APPL1 PE=1 SV=1	105.59	0	90.3257	[25] Phospho (ST)	1	VLSSSQS*EESDLG	693	sp|Q9UKG1|DP13A_HUMAN	21605.5	11820.8	34092.4	25237.2	49121.3	1.12742e+06	21605.5	49121.3	0.496001	1.57158	1.18495	0	0	0.156933	0.342475	0.156933	0.342475
VNQSALEAVTPSPSFQQR	sp|Q9UKG1|DP13A_HUMAN	Q9UKG1	APPL1	DCC-interacting protein 13-alpha OS=Homo sapiens OX=9606 GN=APPL1 PE=1 SV=1	48.55	0.000124626	81.6839	[10] Phospho (ST)|[12] Phospho (ST)	2	SALEAVT*PSPSFQ,LEAVTPS*PSFQQR	399401	sp|Q9UKG1|DP13A_HUMAN	5100.38	25906.1	8176.37	4019.64	13629.8	22069.3	8176.37	13629.8	0.859818	0.682133	0.737237	0	0	0.953334	0.975954	0.953334	0.975954
VNQSALEAVTPSPSFQQR	sp|Q9UKG1|DP13A_HUMAN	Q9UKG1	APPL1	DCC-interacting protein 13-alpha OS=Homo sapiens OX=9606 GN=APPL1 PE=1 SV=1	136.08	0	87.1861	[12] Phospho (ST)	1	LEAVTPS*PSFQQR	401	sp|Q9UKG1|DP13A_HUMAN	15585	34563.4	38346.2	115278	89005.3	687931	34563.4	115278	0.413474	1.13805	1.7378	0	0	0.0215567	0.111941	0.0215567	0.111941
KRSGNSDSIER	sp|Q7Z2E3|APTX_HUMAN	Q7Z2E3	APTX	Aprataxin OS=Homo sapiens OX=9606 GN=APTX PE=1 SV=2	86.13	0.000318066	15.0864	[3] Phospho (ST)	1	HRKRKRS*GNSDSI	132	sp|Q7Z2E3|APTX_HUMAN	122273	284080	269418	703.165	99445.4	413118	269418	99445.4	0.39727	1.25864	-1.43787	0	0	0.292032	0.490643	0.292032	0.490643
KEVCSVAFLK	sp|P55064|AQP5_HUMAN	P55064	AQP5	Aquaporin-5 OS=Homo sapiens OX=9606 GN=AQP5 PE=1 SV=1	13.33	0.0018812	24.8264	[5] Phospho (ST)	1	MKKEVCS*VAFLKA	7	sp|P55064|AQP5_HUMAN	64.3053	64.3053	64.3053	38302.2	64.3053	64.3053	64.3053	64.3053	0	1.72336	0	1	0.666667	0.286224	0.488809	0.286224	0.488809
STSTPNVHMVSTTAPMDSNLIQLTGQSFSTDAAGSR	sp|P10398|ARAF_HUMAN	P10398	ARAF	Serine/threonine-protein kinase A-Raf OS=Homo sapiens OX=9606 GN=ARAF PE=1 SV=2	85.65	0.000314268	97.6946	[18] Phospho (ST)	1	TTAPMDS*NLIQLT	229	sp|P10398|ARAF_HUMAN	1.83095e+06	2.0483e+06	1.65859e+06	1.68321e+06	2.13646e+06	2.07554e+06	1.83095e+06	2.07554e+06	0.105791	0.125183	0.1809	0	0	0.750803	0.853998	0.750803	0.853998
LFPEFDDSDYDEVPEEGPGAPAR	sp|Q96P48|ARAP1_HUMAN	Q96P48	ARAP1	Arf-GAP with Rho-GAP domain, ANK repeat and PH domain-containing protein 1 OS=Homo sapiens OX=9606 GN=ARAP1 PE=1 SV=3	80.62	0.000276319	97.4447	[8] Phospho (ST)	1	FPEFDDS*DYDEVP	229	sp|Q96P48|ARAP1_HUMAN	661134	763968	646770	79328	280697	378323	661134	280697	0.0925572	0.619494	-1.23593	0	0	0.0343467	0.145609	0.0343467	0.145609
RHSSSDLAR	sp|Q8WWN8|ARAP3_HUMAN	Q8WWN8	ARAP3	Arf-GAP with Rho-GAP domain, ANK repeat and PH domain-containing protein 3 OS=Homo sapiens OX=9606 GN=ARAP3 PE=1 SV=1	41.82	0.000315424	14.4727	[3] Phospho (ST)	1	VVLRRHS*SSDLAR	1337	sp|Q8WWN8|ARAP3_HUMAN	55657.9	109436	81793.3	1096.45	6135.22	4594.45	81793.3	4594.45	0.32678	0.654982	-4.15402	0	0	0.000912365	0.0274802	0.000912365	0.0274802
SSTLGQEERPPEPPPGPPSKSSPQAR	sp|Q8WWN8|ARAP3_HUMAN	Q8WWN8	ARAP3	Arf-GAP with Rho-GAP domain, ANK repeat and PH domain-containing protein 3 OS=Homo sapiens OX=9606 GN=ARAP3 PE=1 SV=1	30.28	0.00095511	59.8576	[22] Phospho (ST)	1	GPPSKSS*PQARGS	1474	sp|Q8WWN8|ARAP3_HUMAN	611062	501637	601971	910903	421274	534663	601971	534663	0.10624	0.411879	-0.171064	0	0	0.895712	0.942445	0.895712	0.942445
VTQVDGNSPVR	sp|P48444|COPD_HUMAN	P48444	ARCN1	Coatomer subunit delta OS=Homo sapiens OX=9606 GN=ARCN1 PE=1 SV=1	37.35	0.000471254	32.7573	[8] Phospho (ST)	1	TQVDGNS*PVRFST	493	sp|P48444|COPD_HUMAN	62467	91848.9	115069	38918	49788.2	239776	91848.9	49788.2	0.293572	1.03164	-0.883459	0	0	0.832905	0.905988	0.832905	0.905988
RPSTAVDEEDEDSPSECHTPEK	sp|O15033|AREL1_HUMAN	O15033	AREL1	Apoptosis-resistant E3 ubiquitin protein ligase 1 OS=Homo sapiens OX=9606 GN=AREL1 PE=1 SV=3	32.66	0.00075662	39.4789	[3] Phospho (ST)	1	SSQRRPS*TAVDEE	327	sp|O15033|AREL1_HUMAN	289186	592613	494323	48234	26912.2	79959.6	494323	48234	0.337508	0.51629	-3.35733	0	0	0.00105921	0.0289846	0.00105921	0.0289846
LGLHSLR	sp|P61204|ARF3_HUMAN	P61204	ARF3	ADP-ribosylation factor 3 OS=Homo sapiens OX=9606 GN=ARF3 PE=1 SV=2	48.3	0.000123824	65.5884	[5] Phospho (ST)	1	DKLGLHS*LRHRNW	147	sp|P61204|ARF3_HUMAN	29055	16804.8	15954.3	15325.7	5441.05	34349.2	16804.8	15325.7	0.355771	0.799743	-0.132915	0	0.333333	0.53582	0.697425	0.53582	0.697425
LGLQSLR	sp|P18085|ARF4_HUMAN	P18085	ARF4	ADP-ribosylation factor 4 OS=Homo sapiens OX=9606 GN=ARF4 PE=1 SV=3	47.21	0.000120062	84.568	[5] Phospho (ST)	1	DKLGLQS*LRNRTW	147	sp|P18085|ARF4_HUMAN	64.3053	634.644	798.09	1151.93	64.3053	64.3053	634.644	64.3053	0.771996	1.47111	-3.30294	0.333333	0.666667	0.573298	0.726295	0.573298	0.726295
EWSLESSPAQNWTPPQPR	sp|Q8N6T3|ARFG1_HUMAN	Q8N6T3	ARFGAP1	ADP-ribosylation factor GTPase-activating protein 1 OS=Homo sapiens OX=9606 GN=ARFGAP1 PE=1 SV=2	68.94	0.000203957	95.4363	[13] Phospho (ST)	1	SPAQNWT*PPQPRT	135	sp|Q8N6T3|ARFG1_HUMAN	391826	373548	571092	537940	443016	283034	391826	443016	0.245032	0.305768	0.177146	0	0	0.78948	0.878199	0.78948	0.878199
KSPSSDSWTCADTSTER	sp|Q8N6T3|ARFG1_HUMAN	Q8N6T3	ARFGAP1	ADP-ribosylation factor GTPase-activating protein 1 OS=Homo sapiens OX=9606 GN=ARFGAP1 PE=1 SV=2	93.27	0	48.7399	[2] Phospho (ST)	1	PTKTRKS*PSSDSW	343	sp|Q8N6T3|ARFG1_HUMAN	369946	344477	163057	281865	665254	374243	344477	374243	0.385706	0.454274	0.119567	0	0	0.290914	0.489744	0.290914	0.489744
RSSDSWEVWGSASTNR	sp|Q8N6T3|ARFG1_HUMAN	Q8N6T3	ARFGAP1	ADP-ribosylation factor GTPase-activating protein 1 OS=Homo sapiens OX=9606 GN=ARFGAP1 PE=1 SV=2	140.03	0	85.6815	[3] Phospho (ST)	1	STERRSS*DSWEVW	361	sp|Q8N6T3|ARFG1_HUMAN	4.03698e+06	4.00254e+06	4.42111e+06	2.48325e+06	3.65603e+06	4.17119e+06	4.03698e+06	3.65603e+06	0.0559427	0.251702	-0.142999	0	0	0.35726	0.548678	0.35726	0.548678
SPSSDSWTCADTSTER	sp|Q8N6T3|ARFG1_HUMAN	Q8N6T3	ARFGAP1	ADP-ribosylation factor GTPase-activating protein 1 OS=Homo sapiens OX=9606 GN=ARFGAP1 PE=1 SV=2	85.68	0.000314762	57.3903	[1] Phospho (ST)	1	PTKTRKS*PSSDSW	343	sp|Q8N6T3|ARFG1_HUMAN	785643	855420	786044	923599	1.2774e+06	285876	786044	923599	0.0496523	0.606172	0.232655	0	0	0.733567	0.842069	0.733567	0.842069
TRKSPSSDSWTCADTSTER	sp|Q8N6T3|ARFG1_HUMAN	Q8N6T3	ARFGAP1	ADP-ribosylation factor GTPase-activating protein 1 OS=Homo sapiens OX=9606 GN=ARFGAP1 PE=1 SV=2	158.66	0	42.777	[4] Phospho (ST)	1	PTKTRKS*PSSDSW	343	sp|Q8N6T3|ARFG1_HUMAN	1.4246e+06	991435	1.00998e+06	1.76761e+06	2.06802e+06	2.08256e+06	1.00998e+06	2.06802e+06	0.214456	0.0901209	1.03393	0	0	0.0316288	0.138597	0.0316288	0.138597
YVGFGNTPPPQK	sp|Q8N6T3|ARFG1_HUMAN	Q8N6T3	ARFGAP1	ADP-ribosylation factor GTPase-activating protein 1 OS=Homo sapiens OX=9606 GN=ARFGAP1 PE=1 SV=2	26.52	0.00116805	66.4969	[7] Phospho (ST)	1	YVGFGNT*PPPQKK	189	sp|Q8N6T3|ARFG1_HUMAN	229357	277326	225456	205330	257063	178965	229357	205330	0.118367	0.185838	-0.15965	0	0	0.501679	0.670223	0.501679	0.670223
YVGFGNTPPPQKK	sp|Q8N6T3|ARFG1_HUMAN	Q8N6T3	ARFGAP1	ADP-ribosylation factor GTPase-activating protein 1 OS=Homo sapiens OX=9606 GN=ARFGAP1 PE=1 SV=2	84.03	0.0003003	55.7735	[7] Phospho (ST)	1	YVGFGNT*PPPQKK	189	sp|Q8N6T3|ARFG1_HUMAN	347088	398382	344805	174540	321810	184114	347088	184114	0.08336	0.363288	-0.914701	0	0	0.0768616	0.226863	0.0768616	0.226863
HGTDLWIDNMSSAVPNHSPEKK	sp|Q8N6H7|ARFG2_HUMAN	Q8N6H7	ARFGAP2	ADP-ribosylation factor GTPase-activating protein 2 OS=Homo sapiens OX=9606 GN=ARFGAP2 PE=1 SV=1	115.77	0	71.5704	[10] Oxidation (M)|[18] Phospho (ST)	2	DLWIDNM*SSAVPN,SAVPNHS*PEKKDS	138146	sp|Q8N6H7|ARFG2_HUMAN	2.07291e+06	1.40184e+06	1.5431e+06	3.40114e+06	6.05025e+06	916710	1.5431e+06	3.40114e+06	0.211516	0.742819	1.14019	0	0	0.385501	0.573686	0.385501	0.573686
HGTDLWIDNMSSAVPNHSPEKK	sp|Q8N6H7|ARFG2_HUMAN	Q8N6H7	ARFGAP2	ADP-ribosylation factor GTPase-activating protein 2 OS=Homo sapiens OX=9606 GN=ARFGAP2 PE=1 SV=1	82.2	0.000287191	86.9492	[18] Phospho (ST)	1	SAVPNHS*PEKKDS	146	sp|Q8N6H7|ARFG2_HUMAN	4.89372e+06	4.12425e+06	4.56271e+06	1.12206e+07	1.30808e+07	857355	4.56271e+06	1.12206e+07	0.0852649	0.78536	1.29818	0	0	0.896622	0.942927	0.896622	0.942927
VSSQSFSEIER	sp|Q8N6H7|ARFG2_HUMAN	Q8N6H7	ARFGAP2	ADP-ribosylation factor GTPase-activating protein 2 OS=Homo sapiens OX=9606 GN=ARFGAP2 PE=1 SV=1	75.25	0.00024079	69.7462	[5] Phospho (ST)	1	QKVSSQS*FSEIER	240	sp|Q8N6H7|ARFG2_HUMAN	60004.6	82421.1	73872	95234.3	53958.6	40565.2	73872	53958.6	0.156908	0.450494	-0.453176	0	0	0.52864	0.691782	0.52864	0.691782
SVISHSVTSDMQTIEQESPIMAKPR	sp|Q9NP61|ARFG3_HUMAN	Q9NP61	ARFGAP3	ADP-ribosylation factor GTPase-activating protein 3 OS=Homo sapiens OX=9606 GN=ARFGAP3 PE=1 SV=1	24.41	0.00132645	77.6978	[11] Oxidation (M)|[18] Phospho (ST)	2	HSVTSDM*QTIEQE,QTIEQES*PIMAKP	324331	sp|Q9NP61|ARFG3_HUMAN	15799.1	4768.66	1841.46	4540.48	10529.8	17106.9	4768.66	10529.8	0.985366	0.586021	1.14283	0	0.333333	0.393672	0.581535	0.393672	0.581535
SVISHSVTSDMQTIEQESPIMAKPR	sp|Q9NP61|ARFG3_HUMAN	Q9NP61	ARFGAP3	ADP-ribosylation factor GTPase-activating protein 3 OS=Homo sapiens OX=9606 GN=ARFGAP3 PE=1 SV=1	26.79	0.00110165	89.0475	[18] Phospho (ST)	1	QTIEQES*PIMAKP	331	sp|Q9NP61|ARFG3_HUMAN	79544.6	75823.3	104629	47421.6	33559	150049	79544.6	47421.6	0.180782	0.82629	-0.746221	0	0	0.476124	0.648077	0.476124	0.648077
SVISHSVTSDMQTIEQESPIMAKPR	sp|Q9NP61|ARFG3_HUMAN	Q9NP61	ARFGAP3	ADP-ribosylation factor GTPase-activating protein 3 OS=Homo sapiens OX=9606 GN=ARFGAP3 PE=1 SV=1	126.8	0	85.2467	[18] Phospho (ST)|[21] Oxidation (M)	2	QTIEQES*PIMAKP,EQESPIM*AKPRKK	331334	sp|Q9NP61|ARFG3_HUMAN	73184.5	96251.7	97635.4	57466.2	48939.7	16474.7	96251.7	48939.7	0.154281	0.52806	-0.975806	0	0	0.057745	0.194093	0.057745	0.194093
ACEVALEEIKAETEKQSPPHGEAK	sp|Q9Y6D6|BIG1_HUMAN	Q9Y6D6	ARFGEF1	Brefeldin A-inhibited guanine nucleotide-exchange protein 1 OS=Homo sapiens OX=9606 GN=ARFGEF1 PE=1 SV=2	46.12	0.000116782	77.5103	[17] Phospho (ST)	1	AETEKQS*PPHGEA	52	sp|Q9Y6D6|BIG1_HUMAN	173258	262543	263228	178142	101147	280824	262543	178142	0.222084	0.482817	-0.559521	0	0	0.40689	0.593373	0.40689	0.593373
GREGSLTGTK	sp|Q9Y6D6|BIG1_HUMAN	Q9Y6D6	ARFGEF1	Brefeldin A-inhibited guanine nucleotide-exchange protein 1 OS=Homo sapiens OX=9606 GN=ARFGEF1 PE=1 SV=2	36.86	0.000465593	19.6804	[5] Phospho (ST)	1	VRGREGS*LTGTKD	1079	sp|Q9Y6D6|BIG1_HUMAN	678274	1.06727e+06	725388	448616	221189	1.25217e+06	725388	448616	0.257756	0.845468	-0.693272	0	0	0.349507	0.541676	0.349507	0.541676
KACEVALEEIKAETEKQSPPHGEAK	sp|Q9Y6D6|BIG1_HUMAN	Q9Y6D6	ARFGEF1	Brefeldin A-inhibited guanine nucleotide-exchange protein 1 OS=Homo sapiens OX=9606 GN=ARFGEF1 PE=1 SV=2	31.48	0.000899869	72.8721	[18] Phospho (ST)	1	AETEKQS*PPHGEA	52	sp|Q9Y6D6|BIG1_HUMAN	369430	516091	646144	335183	229450	91703.4	516091	229450	0.271157	0.558053	-1.16945	0	0.166667	0.0524429	0.184158	0.0524429	0.184158
LSVSSNDTQESGNSSGPSPGAK	sp|Q9Y6D6|BIG1_HUMAN	Q9Y6D6	ARFGEF1	Brefeldin A-inhibited guanine nucleotide-exchange protein 1 OS=Homo sapiens OX=9606 GN=ARFGEF1 PE=1 SV=2	117.93	0	47.4336	[4] Phospho (ST)|[5] Phospho (ST)	2	DDRLSVS*SNDTQE,DRLSVSS*NDTQES	396397	sp|Q9Y6D6|BIG1_HUMAN	128112	109950	164864	28041	7407.67	13229.2	128112	13229.2	0.2083	0.655622	-3.2756	0	0.333333	0.00128821	0.0325248	0.00128821	0.0325248
LSVSSNDTQESGNSSGPSPGAK	sp|Q9Y6D6|BIG1_HUMAN	Q9Y6D6	ARFGEF1	Brefeldin A-inhibited guanine nucleotide-exchange protein 1 OS=Homo sapiens OX=9606 GN=ARFGEF1 PE=1 SV=2	110.65	0	46.3584	[5] Phospho (ST)	1	DRLSVSS*NDTQES	397	sp|Q9Y6D6|BIG1_HUMAN	626169	652265	522690	261650	191575	396424	626169	261650	0.114146	0.367611	-1.25891	0	0	0.0206617	0.109636	0.0206617	0.109636
SVDIHDSIQPR	sp|Q9Y6D6|BIG1_HUMAN	Q9Y6D6	ARFGEF1	Brefeldin A-inhibited guanine nucleotide-exchange protein 1 OS=Homo sapiens OX=9606 GN=ARFGEF1 PE=1 SV=2	90.19	0	62.7088	[1] Phospho (ST)	1	DTISQKS*VDIHDS	1569	sp|Q9Y6D6|BIG1_HUMAN	807480	988029	831750	241912	209764	126887	831750	209764	0.11189	0.307732	-1.98738	0	0.333333	0.000835905	0.0267804	0.000835905	0.0267804
TTIPHALLTWRPNSGETAPPPPSPVSEKPLDTISQK	sp|Q9Y6D6|BIG1_HUMAN	Q9Y6D6	ARFGEF1	Brefeldin A-inhibited guanine nucleotide-exchange protein 1 OS=Homo sapiens OX=9606 GN=ARFGEF1 PE=1 SV=2	30.08	0.000950495	94.6897	[23] Phospho (ST)	1	TAPPPPS*PVSEKP	1555	sp|Q9Y6D6|BIG1_HUMAN	661601	1.00167e+06	919904	1.03169e+06	457606	647074	919904	647074	0.206149	0.41077	-0.507551	0	0	0.441935	0.621184	0.441935	0.621184
ELEKPIQSKPQSPVIQAAAVSPK	sp|Q9Y6D5|BIG2_HUMAN	Q9Y6D5	ARFGEF2	Brefeldin A-inhibited guanine nucleotide-exchange protein 2 OS=Homo sapiens OX=9606 GN=ARFGEF2 PE=1 SV=3	62.26	0.000174277	77.6978	[12] Phospho (ST)|[21] Phospho (ST)	2	IQSKPQS*PVIQAA,IQAAAVS*PKFVRL	218227	sp|Q9Y6D5|BIG2_HUMAN	2.46557e+06	2.25435e+06	2.20297e+06	2.6628e+06	1.75672e+06	2.91084e+06	2.25435e+06	2.6628e+06	0.060308	0.248634	0.240231	0	0	0.872821	0.928618	0.872821	0.928618
ELEKPIQSKPQSPVIQAAAVSPK	sp|Q9Y6D5|BIG2_HUMAN	Q9Y6D5	ARFGEF2	Brefeldin A-inhibited guanine nucleotide-exchange protein 2 OS=Homo sapiens OX=9606 GN=ARFGEF2 PE=1 SV=3	149.8	0	77.4604	[21] Phospho (ST)	1	IQAAAVS*PKFVRL	227	sp|Q9Y6D5|BIG2_HUMAN	7.88796e+06	7.12463e+06	7.38586e+06	8.24489e+06	4.55526e+06	8.25825e+06	7.38586e+06	8.24489e+06	0.0519609	0.304022	0.158734	0	0	0.694478	0.814819	0.694478	0.814819
GQSQLSNPTDDSWK	sp|Q9Y6D5|BIG2_HUMAN	Q9Y6D5	ARFGEF2	Brefeldin A-inhibited guanine nucleotide-exchange protein 2 OS=Homo sapiens OX=9606 GN=ARFGEF2 PE=1 SV=3	59.09	0.000160901	69.1526	[3] Phospho (ST)|[6] Phospho (ST)	2	PSERGQS*QLSNPT,RGQSQLS*NPTDDS	15251528	sp|Q9Y6D5|BIG2_HUMAN	54890	71674.2	74338.5	48046.2	10918.8	11912.8	71674.2	11912.8	0.157449	0.895389	-2.58894	0	0	0.0301839	0.134498	0.0301839	0.134498
GQSQLSNPTDDSWK	sp|Q9Y6D5|BIG2_HUMAN	Q9Y6D5	ARFGEF2	Brefeldin A-inhibited guanine nucleotide-exchange protein 2 OS=Homo sapiens OX=9606 GN=ARFGEF2 PE=1 SV=3	75.19	0.000240385	66.743	[6] Phospho (ST)	1	RGQSQLS*NPTDDS	1528	sp|Q9Y6D5|BIG2_HUMAN	770426	683698	631469	644781	496152	68173.5	683698	496152	0.100962	0.742787	-0.462577	0	0	0.198606	0.393813	0.198606	0.393813
GSSLSGTDDGAQEVVK	sp|Q9Y6D5|BIG2_HUMAN	Q9Y6D5	ARFGEF2	Brefeldin A-inhibited guanine nucleotide-exchange protein 2 OS=Homo sapiens OX=9606 GN=ARFGEF2 PE=1 SV=3	47.01	0.00011946	57.4147	[3] Phospho (ST)	1	PRERGSS*LSGTDD	277	sp|Q9Y6D5|BIG2_HUMAN	1.51224e+06	1.90876e+06	1.56916e+06	1.81962e+06	926448	977989	1.56916e+06	977989	0.128892	0.403961	-0.682101	0	0	0.233648	0.434132	0.233648	0.434132
GSSLSGTDDGAQEVVKDILEDVVTSAIK	sp|Q9Y6D5|BIG2_HUMAN	Q9Y6D5	ARFGEF2	Brefeldin A-inhibited guanine nucleotide-exchange protein 2 OS=Homo sapiens OX=9606 GN=ARFGEF2 PE=1 SV=3	38.8	0.000488424	101.366	[3] Phospho (ST)	1	PRERGSS*LSGTDD	277	sp|Q9Y6D5|BIG2_HUMAN	498208	164575	417083	555465	992532	338304	417083	555465	0.483388	0.529953	0.413361	0	0	0.234033	0.434456	0.234033	0.434456
HSQAQSKPTTPEKTDLTNGEHAR	sp|Q9Y6D5|BIG2_HUMAN	Q9Y6D5	ARFGEF2	Brefeldin A-inhibited guanine nucleotide-exchange protein 2 OS=Homo sapiens OX=9606 GN=ARFGEF2 PE=1 SV=3	63.25	0.000179244	28.6879	[9] Phospho (ST)	1	QAQSKPT*TPEKTD	243	sp|Q9Y6D5|BIG2_HUMAN	338498	530364	611322	869493	335633	120441	530364	335633	0.283989	0.872815	-0.660099	0	0	0.503325	0.671411	0.503325	0.671411
PQSPVIQAAAVSPK	sp|Q9Y6D5|BIG2_HUMAN	Q9Y6D5	ARFGEF2	Brefeldin A-inhibited guanine nucleotide-exchange protein 2 OS=Homo sapiens OX=9606 GN=ARFGEF2 PE=1 SV=3	88.74	0	74.8387	[12] Phospho (ST)	1	IQAAAVS*PKFVRL	227	sp|Q9Y6D5|BIG2_HUMAN	1.09224e+06	1.16099e+06	1.05658e+06	1.3115e+06	531016	1.13607e+06	1.09224e+06	1.13607e+06	0.0481058	0.412419	0.0567709	0	0.166667	0.566606	0.721132	0.566606	0.721132
RCSVTSMESTVSSGTQTTVQDDPEQFEVIK	sp|Q9Y6D5|BIG2_HUMAN	Q9Y6D5	ARFGEF2	Brefeldin A-inhibited guanine nucleotide-exchange protein 2 OS=Homo sapiens OX=9606 GN=ARFGEF2 PE=1 SV=3	21.84	0.00139165	94.6028	[13] Phospho (ST)|[15] Phospho (ST)	2	MESTVSS*GTQTTV,STVSSGT*QTTVQD	624626	sp|Q9Y6D5|BIG2_HUMAN	267943	250365	306381	51249.4	132411	97847.7	267943	97847.7	0.104213	0.434047	-1.45332	0	0	0.00888872	0.0707383	0.00888872	0.0707383
RCSVTSMESTVSSGTQTTVQDDPEQFEVIK	sp|Q9Y6D5|BIG2_HUMAN	Q9Y6D5	ARFGEF2	Brefeldin A-inhibited guanine nucleotide-exchange protein 2 OS=Homo sapiens OX=9606 GN=ARFGEF2 PE=1 SV=3	90.04	0	93.0831	[3] Phospho (ST)	1	DMARRCS*VTSMES	614	sp|Q9Y6D5|BIG2_HUMAN	1.45728e+06	1.86155e+06	1.73953e+06	1.25787e+06	652292	154543	1.73953e+06	652292	0.122979	0.802838	-1.41511	0	0	0.0746563	0.223244	0.0746563	0.223244
RCSVTSMESTVSSGTQTTVQDDPEQFEVIK	sp|Q9Y6D5|BIG2_HUMAN	Q9Y6D5	ARFGEF2	Brefeldin A-inhibited guanine nucleotide-exchange protein 2 OS=Homo sapiens OX=9606 GN=ARFGEF2 PE=1 SV=3	57.76	0.000156031	91.0192	[3] Phospho (ST)|[5] Phospho (ST)|[7] Oxidation (M)	3	DMARRCS*VTSMES,ARRCSVT*SMESTV,RCSVTSM*ESTVSS	614616618	sp|Q9Y6D5|BIG2_HUMAN	189079	160234	154705	258282	119985	71039.8	160234	119985	0.109866	0.648396	-0.417334	0	0	0.512022	0.678236	0.512022	0.678236
AGGGDLLLPPSPK	sp|Q5TH69|BIG3_HUMAN	Q5TH69	ARFGEF3	Brefeldin A-inhibited guanine nucleotide-exchange protein 3 OS=Homo sapiens OX=9606 GN=ARFGEF3 PE=1 SV=3	65.4	0.000188929	89.9296	[11] Phospho (ST)	1	DLLLPPS*PKVEKK	1991	sp|Q5TH69|BIG3_HUMAN	854572	1.07656e+06	743176	149795	18917.9	228364	854572	149795	0.190393	0.799388	-2.51222	0	0	0.0155739	0.0941624	0.0155739	0.0941624
ATGSAGLLGDPECEGSPPEHSPEQGR	sp|Q5TH69|BIG3_HUMAN	Q5TH69	ARFGEF3	Brefeldin A-inhibited guanine nucleotide-exchange protein 3 OS=Homo sapiens OX=9606 GN=ARFGEF3 PE=1 SV=3	33.44	0.000685225	73.5168	[16] Phospho (ST)	1	DPECEGS*PPEHSP	1061	sp|Q5TH69|BIG3_HUMAN	1.38434e+06	1.62406e+06	1.41433e+06	893891	375350	1.37879e+06	1.41433e+06	893891	0.0885932	0.568514	-0.661949	0	0	0.131783	0.308017	0.131783	0.308017
ATGSAGLLGDPECEGSPPEHSPEQGR	sp|Q5TH69|BIG3_HUMAN	Q5TH69	ARFGEF3	Brefeldin A-inhibited guanine nucleotide-exchange protein 3 OS=Homo sapiens OX=9606 GN=ARFGEF3 PE=1 SV=3	17.85	0.00153837	72.7507	[21] Phospho (ST)	1	GSPPEHS*PEQGRS	1066	sp|Q5TH69|BIG3_HUMAN	772658	696787	673413	476101	341169	398060	696787	398060	0.0726387	0.167217	-0.80773	0	0	0.0230475	0.115839	0.0230475	0.115839
HSFSAGPELLR	sp|Q5TH69|BIG3_HUMAN	Q5TH69	ARFGEF3	Brefeldin A-inhibited guanine nucleotide-exchange protein 3 OS=Homo sapiens OX=9606 GN=ARFGEF3 PE=1 SV=3	31.21	0.000893655	84.8029	[4] Phospho (ST)	1	QMRHSFS*AGPELL	2081	sp|Q5TH69|BIG3_HUMAN	194458	171570	191941	463935	501984	112694	191941	463935	0.0674813	0.596928	1.27326	0	0	0.331666	0.525989	0.331666	0.525989
SDVSDIGSDNCSLADEEQTPR	sp|Q5TH69|BIG3_HUMAN	Q5TH69	ARFGEF3	Brefeldin A-inhibited guanine nucleotide-exchange protein 3 OS=Homo sapiens OX=9606 GN=ARFGEF3 PE=1 SV=3	85.43	0.000312598	71.2133	[8] Phospho (ST)	1	DVSDIGS*DNCSLA	632	sp|Q5TH69|BIG3_HUMAN	100305	122582	111762	89769.5	11151.2	31307	111762	31307	0.0998651	0.926468	-1.83588	0	0	0.0601311	0.198397	0.0601311	0.198397
SGSTGSSLSVSVR	sp|Q5TH69|BIG3_HUMAN	Q5TH69	ARFGEF3	Brefeldin A-inhibited guanine nucleotide-exchange protein 3 OS=Homo sapiens OX=9606 GN=ARFGEF3 PE=1 SV=3	65.42	0.000188964	63.181	[3] Phospho (ST)	1	KRPRSGS*TGSSLS	2097	sp|Q5TH69|BIG3_HUMAN	792423	1.15078e+06	1.04163e+06	160323	79788.4	31757.8	1.04163e+06	79788.4	0.184617	0.716856	-3.70653	0	0	0.00134958	0.0333709	0.00134958	0.0333709
AQESPKNSAAEIPVTSNGEVDDSR	sp|P53367|ARFP1_HUMAN	P53367	ARFIP1	Arfaptin-1 OS=Homo sapiens OX=9606 GN=ARFIP1 PE=1 SV=2	160.09	0	76.4136	[N-term] Acetyl (Protein N-term)|[4] Phospho (ST)	2	MA*QESPKN,MAQES*PKNSAA	2,5	sp|P53367|ARFP1_HUMAN	741287	737368	802262	1.22802e+06	481225	809111	741287	809111	0.0478593	0.445913	0.126304	0	0	0.922068	0.957787	0.922068	0.957787
HSLPSGLGLSETQITSHGFDNTK	sp|P53367|ARFP1_HUMAN	P53367	ARFIP1	Arfaptin-1 OS=Homo sapiens OX=9606 GN=ARFIP1 PE=1 SV=2	51.87	0.00013519	93.3807	[5] Phospho (ST)	1	LKHSLPS*GLGLSE	39	sp|P53367|ARFP1_HUMAN	7059.74	68258	28980.9	445241	177194	679515	28980.9	445241	0.89186	0.579168	3.94141	0	0	0.00740375	0.0658177	0.00740375	0.0658177
KWSLNTYK	sp|P53367|ARFP1_HUMAN	P53367	ARFIP1	Arfaptin-1 OS=Homo sapiens OX=9606 GN=ARFIP1 PE=1 SV=2	26.93	0.00110497	70.4993	[3] Phospho (ST)	1	ELVRKWS*LNTYKC	132	sp|P53367|ARFP1_HUMAN	577772	509293	509920	84482	46166.1	430612	509920	84482	0.0739325	1.13192	-2.59355	0	0	0.0463262	0.171791	0.0463262	0.171791
NSAAEIPVTSNGEVDDSREHSFNR	sp|P53367|ARFP1_HUMAN	P53367	ARFIP1	Arfaptin-1 OS=Homo sapiens OX=9606 GN=ARFIP1 PE=1 SV=2	22.52	0.00141015	68.2532	[21] Phospho (ST)	1	DDSREHS*FNRDLK	28	sp|P53367|ARFP1_HUMAN	118848	140876	161910	201267	180999	63488.3	140876	180999	0.153211	0.500651	0.36156	0	0	0.888005	0.938135	0.888005	0.938135
HPSHSTTPSGPGDEVAR	sp|P53365|ARFP2_HUMAN	P53365	ARFIP2	Arfaptin-2 OS=Homo sapiens OX=9606 GN=ARFIP2 PE=1 SV=1	34.2	0.000522694	30.9753	[6] Phospho (ST)	1	RHPSHST*TPSGPG	75	sp|P53365|ARFP2_HUMAN	324206	358908	225841	38005.1	3593.01	37206.7	324206	37206.7	0.227815	0.747724	-3.12328	0	0	0.00718801	0.0651475	0.00718801	0.0651475
ASSPPDRIDIFGR	sp|Q9NWB6|ARGL1_HUMAN	Q9NWB6	ARGLU1	Arginine and glutamate-rich protein 1 OS=Homo sapiens OX=9606 GN=ARGLU1 PE=1 SV=1	42.08	0.000317898	90.788	[3] Phospho (ST)	1	DRERASS*PPDRID	77	sp|Q9NWB6|ARGL1_HUMAN	2.72622e+06	2.46683e+06	2.77199e+06	3.49356e+06	4.65363e+06	6.79677e+06	2.72622e+06	4.65363e+06	0.0619842	0.336419	0.771456	0	0	0.0460046	0.17139	0.0460046	0.17139
LASIDEK	sp|Q07960|RHG01_HUMAN	Q07960	ARHGAP1	Rho GTPase-activating protein 1 OS=Homo sapiens OX=9606 GN=ARHGAP1 PE=1 SV=1	36.74	0.000464166	41.6129	[3] Phospho (ST)	1	NQLKLAS*IDEKNW	27	sp|Q07960|RHG01_HUMAN	9875.22	10330.4	8462.94	5430.02	756.524	2817.22	9875.22	2817.22	0.101899	0.780399	-1.80954	0	0	0.0347669	0.1469	0.0347669	0.1469
SDDSKSSSPELVTHLK	sp|Q07960|RHG01_HUMAN	Q07960	ARHGAP1	Rho GTPase-activating protein 1 OS=Homo sapiens OX=9606 GN=ARHGAP1 PE=1 SV=1	12.57	0.00185821	68.4656	[1] Phospho (ST)|[8] Phospho (ST)	2	MPDFPKS*DDSKSS,DDSKSSS*PELVTH	44,51	sp|Q07960|RHG01_HUMAN	19282.2	33937.7	35723	38574	10422.7	170189	33937.7	38574	0.304274	1.16729	0.184739	0	0.333333	0.638202	0.776511	0.638202	0.776511
SDDSKSSSPELVTHLK	sp|Q07960|RHG01_HUMAN	Q07960	ARHGAP1	Rho GTPase-activating protein 1 OS=Homo sapiens OX=9606 GN=ARHGAP1 PE=1 SV=1	71.17	0.000216967	67.2461	[7] Phospho (ST)|[8] Phospho (ST)	2	SDDSKSS*SPELVT,DDSKSSS*PELVTH	50,51	sp|Q07960|RHG01_HUMAN	150969	254356	196100	210822	163162	129359	196100	163162	0.258545	0.243933	-0.265284	0	0	0.491805	0.661591	0.491805	0.661591
SDDSKSSSPELVTHLK	sp|Q07960|RHG01_HUMAN	Q07960	ARHGAP1	Rho GTPase-activating protein 1 OS=Homo sapiens OX=9606 GN=ARHGAP1 PE=1 SV=1	51.06	0.000132714	62.1672	[8] Phospho (ST)	1	DDSKSSS*PELVTH	51	sp|Q07960|RHG01_HUMAN	169311	361590	331794	1.01377e+06	677859	1.40063e+06	331794	1.01377e+06	0.35988	0.350893	1.61137	0	0	0.00746614	0.0661107	0.00746614	0.0661107
SSSPELVTHLK	sp|Q07960|RHG01_HUMAN	Q07960	ARHGAP1	Rho GTPase-activating protein 1 OS=Homo sapiens OX=9606 GN=ARHGAP1 PE=1 SV=1	104.68	0	69.0285	[3] Phospho (ST)	1	DDSKSSS*PELVTH	51	sp|Q07960|RHG01_HUMAN	2.68865e+06	3.31982e+06	3.32588e+06	6.63707e+06	4.94446e+06	5.78144e+06	3.31982e+06	5.78144e+06	0.117683	0.146229	0.800325	0	0	0.0182534	0.102525	0.0182534	0.102525
TPPDTTFPEPTCLSASPPNAPPR	sp|A1A4S6|RHG10_HUMAN	A1A4S6	ARHGAP10	Rho GTPase-activating protein 10 OS=Homo sapiens OX=9606 GN=ARHGAP10 PE=1 SV=1	67.32	0.00019604	93.3807	[16] Phospho (ST)	1	PTCLSAS*PPNAPP	591	sp|A1A4S6|RHG10_HUMAN	886118	800364	975075	955111	511367	1.54226e+06	886118	955111	0.0984694	0.515606	0.10817	0	0	0.93192	0.963214	0.93192	0.963214
AGCFSPK	sp|Q6P4F7|RHGBA_HUMAN	Q6P4F7	ARHGAP11A	Rho GTPase-activating protein 11A OS=Homo sapiens OX=9606 GN=ARHGAP11A PE=1 SV=2	10.43	0.00179729	34.5919	[5] Phospho (ST)	1	GKAGCFS*PKISHK	422	sp|Q6P4F7|RHGBA_HUMAN	64.3053	8861.29	9908.78	64.3053	1514.39	64.3053	8861.29	64.3053	0.861205	1.52868	-7.10644	0.333333	0.666667	0.226541	0.425767	0.226541	0.425767
LASLGDTASPLVK	sp|Q6P4F7|RHGBA_HUMAN	Q6P4F7	ARHGAP11A	Rho GTPase-activating protein 11A OS=Homo sapiens OX=9606 GN=ARHGAP11A PE=1 SV=2	35.21	0.000536817	88.7207	[9] Phospho (ST)	1	SLGDTAS*PLVKSV	868	sp|Q6P4F7|RHGBA_HUMAN	64.3053	3545.45	2626.54	64.3053	2940.81	9666.74	2626.54	2940.81	0.867852	1.16671	0.163048	0.333333	0.333333	0.833313	0.906219	0.833313	0.906219
RQSVGDFVSGALNK	sp|Q6P4F7|RHGBA_HUMAN	Q6P4F7	ARHGAP11A	Rho GTPase-activating protein 11A OS=Homo sapiens OX=9606 GN=ARHGAP11A PE=1 SV=2	42.47	0.000214133	85.3337	[3] Phospho (ST)	1	KRKRRQS*VGDFVS	285	sp|Q6P4F7|RHGBA_HUMAN	273592	313577	293783	191042	109293	1.97065e+06	293783	191042	0.0680843	1.38951	-0.620858	0	0	0.838809	0.908932	0.838809	0.908932
ATTPPNQGRPDSPVYANLQELK	sp|Q8IWW6|RHG12_HUMAN	Q8IWW6	ARHGAP12	Rho GTPase-activating protein 12 OS=Homo sapiens OX=9606 GN=ARHGAP12 PE=1 SV=1	36.05	0.000456371	90.1431	[3] Phospho (ST)|[12] Phospho (ST)	2	EQIRATT*PPNQGR,NQGRPDS*PVYANL	231240	sp|Q8IWW6|RHG12_HUMAN	2.04704e+06	1.91974e+06	1.78265e+06	1.9812e+06	648818	281736	1.91974e+06	648818	0.0689936	0.921358	-1.56502	0	0	0.102059	0.265699	0.102059	0.265699
IHQDSESGDELSSSSTEQIR	sp|Q8IWW6|RHG12_HUMAN	Q8IWW6	ARHGAP12	Rho GTPase-activating protein 12 OS=Homo sapiens OX=9606 GN=ARHGAP12 PE=1 SV=1	126.18	0	57.6514	[5] Phospho (ST)|[7] Phospho (ST)	2	ERIHQDS*ESGDEL,IHQDSES*GDELSS	213215	sp|Q8IWW6|RHG12_HUMAN	87806.7	170639	180821	148980	130170	2.73053e+06	170639	148980	0.348425	1.49111	-0.195825	0.166667	0.166667	0.304446	0.50142	0.304446	0.50142
IHQDSESGDELSSSSTEQIR	sp|Q8IWW6|RHG12_HUMAN	Q8IWW6	ARHGAP12	Rho GTPase-activating protein 12 OS=Homo sapiens OX=9606 GN=ARHGAP12 PE=1 SV=1	134.48	0	53.6493	[7] Phospho (ST)	1	IHQDSES*GDELSS	215	sp|Q8IWW6|RHG12_HUMAN	388165	211404	305951	284604	187896	400635	305951	284604	0.293043	0.365978	-0.104347	0	0	0.860893	0.921793	0.860893	0.921793
SFGHFPGPEFLDVEK	sp|Q8IWW6|RHG12_HUMAN	Q8IWW6	ARHGAP12	Rho GTPase-activating protein 12 OS=Homo sapiens OX=9606 GN=ARHGAP12 PE=1 SV=1	56.67	0.000151653	98.2216	[1] Phospho (ST)	1	SQNRTRS*FGHFPG	176	sp|Q8IWW6|RHG12_HUMAN	8647.07	12317.8	6918.51	6912.56	64.3053	64.3053	8647.07	64.3053	0.296657	1.6846	-7.07113	0	0.666667	0.0470913	0.173583	0.0470913	0.173583
STENVNKLPELSSFGK	sp|Q8IWW6|RHG12_HUMAN	Q8IWW6	ARHGAP12	Rho GTPase-activating protein 12 OS=Homo sapiens OX=9606 GN=ARHGAP12 PE=1 SV=1	18.14	0.00154607	91.0192	[2] Phospho (ST)	1	LHLQRST*ENVNKL	104	sp|Q8IWW6|RHG12_HUMAN	17245.6	5225.36	10282.5	16136.2	13499.3	194527	10282.5	16136.2	0.55279	1.38868	0.650106	0	0	0.166197	0.353707	0.166197	0.353707
STENVNKLPELSSFGKPSSSVQGTGLIR	sp|Q8IWW6|RHG12_HUMAN	Q8IWW6	ARHGAP12	Rho GTPase-activating protein 12 OS=Homo sapiens OX=9606 GN=ARHGAP12 PE=1 SV=1	13.75	0.00177946	94.6028	[2] Phospho (ST)	1	LHLQRST*ENVNKL	104	sp|Q8IWW6|RHG12_HUMAN	102938	111638	120345	76038.8	102291	91103.5	111638	91103.5	0.0779602	0.146681	-0.293255	0	0	0.270502	0.474225	0.270502	0.474225
TRSFGHFPGPEFLDVEK	sp|Q8IWW6|RHG12_HUMAN	Q8IWW6	ARHGAP12	Rho GTPase-activating protein 12 OS=Homo sapiens OX=9606 GN=ARHGAP12 PE=1 SV=1	33.84	0.000518583	95.7281	[3] Phospho (ST)	1	SQNRTRS*FGHFPG	176	sp|Q8IWW6|RHG12_HUMAN	45573.9	75759.2	80159.8	102180	45702.4	36682	75759.2	45702.4	0.28031	0.577018	-0.729151	0	0	0.660086	0.791665	0.660086	0.791665
TSFSQEQSCDSAGEGSER	sp|Q8IWW6|RHG12_HUMAN	Q8IWW6	ARHGAP12	Rho GTPase-activating protein 12 OS=Homo sapiens OX=9606 GN=ARHGAP12 PE=1 SV=1	100.99	0	36.5316	[11] Phospho (ST)	1	QEQSCDS*AGEGSE	201	sp|Q8IWW6|RHG12_HUMAN	748905	584623	564204	1.16864e+06	817377	1529.39	584623	817377	0.160073	0.903781	0.483495	0	0	0.38871	0.577159	0.38871	0.577159
VLSSTINNQAVETDEGIEEEIPDSPGIEK	sp|Q8IWW6|RHG12_HUMAN	Q8IWW6	ARHGAP12	Rho GTPase-activating protein 12 OS=Homo sapiens OX=9606 GN=ARHGAP12 PE=1 SV=1	56.67	0.000151653	94.1135	[24] Phospho (ST)	1	EEEIPDS*PGIEKH	592	sp|Q8IWW6|RHG12_HUMAN	703700	766139	688182	693407	865807	1.05496e+06	703700	865807	0.0573649	0.207532	0.299086	0	0	0.396597	0.583852	0.396597	0.583852
AESSSGGGTVPSSAGILEQGPSPGDGSPPKPK	sp|Q68EM7|RHG17_HUMAN	Q68EM7	ARHGAP17	Rho GTPase-activating protein 17 OS=Homo sapiens OX=9606 GN=ARHGAP17 PE=1 SV=1	141.32	0	81.7335	[27] Phospho (ST)	1	PSPGDGS*PPKPKD	575	sp|Q68EM7|RHG17_HUMAN	1.18601e+07	1.17504e+07	1.17174e+07	2.2468e+07	1.2625e+07	1.73191e+07	1.17504e+07	1.73191e+07	0.00634004	0.281802	0.55965	0	0	0.142438	0.322897	0.142438	0.322897
AESSSGGGTVPSSAGILEQGPSPGDGSPPKPKDPVSAAVPAPGR	sp|Q68EM7|RHG17_HUMAN	Q68EM7	ARHGAP17	Rho GTPase-activating protein 17 OS=Homo sapiens OX=9606 GN=ARHGAP17 PE=1 SV=1	14.63	0.00174795	89.5641	[4] Phospho (ST)	1	SSRAESS*SGGGTV	552	sp|Q68EM7|RHG17_HUMAN	984681	1.08641e+06	1.22348e+06	1.43152e+06	1.74975e+06	1.42357e+06	1.08641e+06	1.43152e+06	0.109118	0.121219	0.397974	0	0	0.117148	0.288052	0.117148	0.288052
KPAPAPPKPGNPPPGHPGGQSSSGTSQHPPSLSPKPPTR	sp|Q68EM7|RHG17_HUMAN	Q68EM7	ARHGAP17	Rho GTPase-activating protein 17 OS=Homo sapiens OX=9606 GN=ARHGAP17 PE=1 SV=1	24.12	0.00131543	54.2979	[33] Phospho (ST)	1	QHPPSLS*PKPPTR	667	sp|Q68EM7|RHG17_HUMAN	2.01999e+06	5.36433e+06	4.73974e+06	2.02006e+06	1.51441e+06	1.19214e+06	4.73974e+06	1.51441e+06	0.439999	0.264882	-1.64605	0	0	0.040447	0.158619	0.040447	0.158619
NNSQIASGQNQPQAAAGSHQLSMGQPHNAAGPSPHTLR	sp|Q68EM7|RHG17_HUMAN	Q68EM7	ARHGAP17	Rho GTPase-activating protein 17 OS=Homo sapiens OX=9606 GN=ARHGAP17 PE=1 SV=1	52.68	0.000137231	57.693	[23] Oxidation (M)|[33] Phospho (ST)	2	GSHQLSM*GQPHNA,HNAAGPS*PHTLRR	615625	sp|Q68EM7|RHG17_HUMAN	2.16727e+06	2.77556e+06	2.63554e+06	4.42306e+06	3.50351e+06	6.15312e+06	2.63554e+06	4.42306e+06	0.126108	0.286647	0.746947	0	0	0.0388235	0.155084	0.0388235	0.155084
NNSQIASGQNQPQAAAGSHQLSMGQPHNAAGPSPHTLR	sp|Q68EM7|RHG17_HUMAN	Q68EM7	ARHGAP17	Rho GTPase-activating protein 17 OS=Homo sapiens OX=9606 GN=ARHGAP17 PE=1 SV=1	67.21	0.000195695	66.4006	[33] Phospho (ST)	1	HNAAGPS*PHTLRR	625	sp|Q68EM7|RHG17_HUMAN	3.11452e+06	4.4392e+06	4.09022e+06	5.06088e+06	5.50646e+06	2.60837e+07	4.09022e+06	5.50646e+06	0.1769	0.983136	0.428945	0	0	0.134899	0.312328	0.134899	0.312328
RPASMAVMEGDLVK	sp|Q68EM7|RHG17_HUMAN	Q68EM7	ARHGAP17	Rho GTPase-activating protein 17 OS=Homo sapiens OX=9606 GN=ARHGAP17 PE=1 SV=1	11.27	0.0018219	62.4541	[4] Phospho (ST)	1	ERKRPAS*MAVMEG	484	sp|Q68EM7|RHG17_HUMAN	856352	730405	932625	452248	1.14659e+06	372205	856352	452248	0.121604	0.648188	-0.921089	0	0	0.323814	0.518537	0.323814	0.518537
SPSPPTQHTGQPPGQPSAPSQLSAPR	sp|Q68EM7|RHG17_HUMAN	Q68EM7	ARHGAP17	Rho GTPase-activating protein 17 OS=Homo sapiens OX=9606 GN=ARHGAP17 PE=1 SV=1	28.43	0.00106772	72.1713	[1] Phospho (ST)|[3] Phospho (ST)	2	PKPPTRS*PSPPTQ,PPTRSPS*PPTQHT	674676	sp|Q68EM7|RHG17_HUMAN	1.27609e+06	1.00047e+06	901101	2.12833e+06	1.9612e+06	2.78279e+06	1.00047e+06	2.12833e+06	0.183415	0.189551	1.08904	0	0	0.0106845	0.077454	0.0106845	0.077454
SPSPPTQHTGQPPGQPSAPSQLSAPR	sp|Q68EM7|RHG17_HUMAN	Q68EM7	ARHGAP17	Rho GTPase-activating protein 17 OS=Homo sapiens OX=9606 GN=ARHGAP17 PE=1 SV=1	105.69	0	69.6107	[3] Phospho (ST)	1	PPTRSPS*PPTQHT	676	sp|Q68EM7|RHG17_HUMAN	2.94701e+07	3.62811e+07	3.26191e+07	5.90034e+07	3.67681e+07	4.79442e+07	3.26191e+07	4.79442e+07	0.103955	0.232077	0.555639	0	0	0.130954	0.306806	0.130954	0.306806
SSGTNFQGLPSK	sp|Q68EM7|RHG17_HUMAN	Q68EM7	ARHGAP17	Rho GTPase-activating protein 17 OS=Homo sapiens OX=9606 GN=ARHGAP17 PE=1 SV=1	58.32	0.000158053	64.6894	[2] Phospho (ST)	1	NQAHKSS*GTNFQG	162	sp|Q68EM7|RHG17_HUMAN	249989	239196	206463	1.29802e+06	604710	953759	239196	953759	0.0977481	0.364075	1.99543	0	0	0.00205529	0.0396277	0.00205529	0.0396277
EKPPSGRQTPQPLR	sp|Q5T5U3|RHG21_HUMAN	Q5T5U3	ARHGAP21	Rho GTPase-activating protein 21 OS=Homo sapiens OX=9606 GN=ARHGAP21 PE=1 SV=2	20.88	0.00143145	32.5787	[9] Phospho (ST)	1	PPSGRQT*PQPLRH	747	sp|Q5T5U3|RHG21_HUMAN	19242.2	18084.7	20552	7115.3	1080.75	28608.5	19242.2	7115.3	0.0639827	1.17941	-1.43528	0	0.333333	0.209705	0.407433	0.209705	0.407433
ESTPSEEPSPPHNSK	sp|Q5T5U3|RHG21_HUMAN	Q5T5U3	ARHGAP21	Rho GTPase-activating protein 21 OS=Homo sapiens OX=9606 GN=ARHGAP21 PE=1 SV=2	55.2	0.000146242	31.0137	[9] Phospho (ST)	1	TPSEEPS*PPHNSK	1504	sp|Q5T5U3|RHG21_HUMAN	777167	690067	553667	902379	638785	1.61833e+06	690067	902379	0.167232	0.481296	0.386997	0	0	0.244352	0.445513	0.244352	0.445513
FAILKESPR	sp|Q5T5U3|RHG21_HUMAN	Q5T5U3	ARHGAP21	Rho GTPase-activating protein 21 OS=Homo sapiens OX=9606 GN=ARHGAP21 PE=1 SV=2	48.71	0.000125063	75.0481	[7] Phospho (ST)	1	FAILKES*PRSLLA	1527	sp|Q5T5U3|RHG21_HUMAN	9765.24	7869.52	4661.22	4751.95	8462	410169	7869.52	8462	0.347146	1.65102	0.104724	0	0	0.334211	0.528407	0.334211	0.528407
FKSDSGSLGDAK	sp|Q5T5U3|RHG21_HUMAN	Q5T5U3	ARHGAP21	Rho GTPase-activating protein 21 OS=Homo sapiens OX=9606 GN=ARHGAP21 PE=1 SV=2	43.3	0.000218579	31.0635	[3] Phospho (ST)	1	KSARFKS*DSGSLG	1713	sp|Q5T5U3|RHG21_HUMAN	173070	284425	180297	75779.5	48995.6	370939	180297	75779.5	0.293087	1.08114	-1.2505	0	0	0.313582	0.50899	0.313582	0.50899
GISQDRSPLVK	sp|Q5T5U3|RHG21_HUMAN	Q5T5U3	ARHGAP21	Rho GTPase-activating protein 21 OS=Homo sapiens OX=9606 GN=ARHGAP21 PE=1 SV=2	29.05	0.00100534	47.4973	[7] Phospho (ST)	1	GISQDRS*PLVKVR	616	sp|Q5T5U3|RHG21_HUMAN	106370	104126	112172	262993	186130	265071	106370	262993	0.0386042	0.188977	1.30594	0	0	0.00742757	0.065959	0.00742757	0.065959
GKSTGSLLTPTR	sp|Q5T5U3|RHG21_HUMAN	Q5T5U3	ARHGAP21	Rho GTPase-activating protein 21 OS=Homo sapiens OX=9606 GN=ARHGAP21 PE=1 SV=2	46.68	0.000118343	57.9162	[3] Phospho (ST)	1	VMKKGKS*TGSLLT	1742	sp|Q5T5U3|RHG21_HUMAN	64.3053	1856.79	1153.9	3098.23	64.3053	14862.4	1153.9	3098.23	0.881142	1.30094	1.42493	0.333333	0.333333	0.557043	0.713631	0.557043	0.713631
HNKSPTLSCR	sp|Q5T5U3|RHG21_HUMAN	Q5T5U3	ARHGAP21	Rho GTPase-activating protein 21 OS=Homo sapiens OX=9606 GN=ARHGAP21 PE=1 SV=2	40.64	0.000409165	19.5895	[4] Phospho (ST)	1	NSKHNKS*PTLSCR	1514	sp|Q5T5U3|RHG21_HUMAN	269441	323584	238082	17117.6	196491	400586	269441	196491	0.156131	0.937164	-0.455506	0	0	0.31513	0.510683	0.31513	0.510683
LRTSTSDLSR	sp|Q5T5U3|RHG21_HUMAN	Q5T5U3	ARHGAP21	Rho GTPase-activating protein 21 OS=Homo sapiens OX=9606 GN=ARHGAP21 PE=1 SV=2	20.13	0.00147663	35.7677	[4] Phospho (ST)	1	RERLRTS*TSDLSR	1861	sp|Q5T5U3|RHG21_HUMAN	1.05826e+06	1.39087e+06	1.19588e+06	745980	372693	874030	1.19588e+06	745980	0.137553	0.392141	-0.680862	0	0	0.0612277	0.199777	0.0612277	0.199777
LSPEVQSVAESK	sp|Q5T5U3|RHG21_HUMAN	Q5T5U3	ARHGAP21	Rho GTPase-activating protein 21 OS=Homo sapiens OX=9606 GN=ARHGAP21 PE=1 SV=2	12.95	0.00187075	64.0529	[2] Phospho (ST)	1	LDSSRLS*PEVQSV	1605	sp|Q5T5U3|RHG21_HUMAN	89796.5	124750	107034	70416.5	58432.6	118842	107034	70416.5	0.163046	0.387387	-0.604086	0	0	0.288935	0.489036	0.288935	0.489036
MEIQVPPSPTDVAK	sp|Q5T5U3|RHG21_HUMAN	Q5T5U3	ARHGAP21	Rho GTPase-activating protein 21 OS=Homo sapiens OX=9606 GN=ARHGAP21 PE=1 SV=2	11.08	0.00181498	82.8347	[1] Oxidation (M)|[8] Phospho (ST)	2	PGRAYRM*EIQVPP,EIQVPPS*PTDVAK	246253	sp|Q5T5U3|RHG21_HUMAN	65460.1	110708	79463.9	339896	100177	158817	79463.9	158817	0.271857	0.625971	0.998996	0	0	0.0907779	0.249111	0.0907779	0.249111
QQTSTPVLTQPGR	sp|Q5T5U3|RHG21_HUMAN	Q5T5U3	ARHGAP21	Rho GTPase-activating protein 21 OS=Homo sapiens OX=9606 GN=ARHGAP21 PE=1 SV=2	46.48	0.000117813	52.7613	[5] Phospho (ST)	1	SKQQTST*PVLTQP	234	sp|Q5T5U3|RHG21_HUMAN	6827.47	9005.65	2853.18	10908.8	23681.2	194.573	6827.47	10908.8	0.500841	1.0141	0.676069	0	0	0.760481	0.860186	0.760481	0.860186
RNSEGSELSCTEGSLTSSLDSR	sp|Q5T5U3|RHG21_HUMAN	Q5T5U3	ARHGAP21	Rho GTPase-activating protein 21 OS=Homo sapiens OX=9606 GN=ARHGAP21 PE=1 SV=2	86.75	0	84.568	[6] Phospho (ST)	1	RRNSEGS*ELSCTE	1672	sp|Q5T5U3|RHG21_HUMAN	904111	925762	954753	488290	733819	296103	925762	488290	0.0273749	0.433534	-0.922903	0	0	0.0530942	0.185423	0.0530942	0.185423
RQLSHDHESVGPPSLDAQPNSK	sp|Q5T5U3|RHG21_HUMAN	Q5T5U3	ARHGAP21	Rho GTPase-activating protein 21 OS=Homo sapiens OX=9606 GN=ARHGAP21 PE=1 SV=2	22.9	0.0013529	55.5772	[9] Phospho (ST)	1	LSHDHES*VGPPSL	862	sp|Q5T5U3|RHG21_HUMAN	447032	490820	370766	206757	180816	132884	447032	180816	0.13928	0.216029	-1.30585	0	0	0.00503539	0.0561845	0.00503539	0.0561845
RRSTSHDRVPQSVQIR	sp|Q5T5U3|RHG21_HUMAN	Q5T5U3	ARHGAP21	Rho GTPase-activating protein 21 OS=Homo sapiens OX=9606 GN=ARHGAP21 PE=1 SV=2	11.29	0.0018226	43.5107	[3] Phospho (ST)|[5] Phospho (ST)	2	LQGRRRS*TSHDRV,GRRRSTS*HDRVPQ	441443	sp|Q5T5U3|RHG21_HUMAN	45473.3	37610.1	42019.7	12188.5	2382.85	38432	42019.7	12188.5	0.0945127	1.05496	-1.78555	0	0	0.0989145	0.261007	0.0989145	0.261007
SASQGALTSPSVSFSNHR	sp|Q5T5U3|RHG21_HUMAN	Q5T5U3	ARHGAP21	Rho GTPase-activating protein 21 OS=Homo sapiens OX=9606 GN=ARHGAP21 PE=1 SV=2	132.71	0	75.0973	[3] Phospho (ST)	1	YCPRSAS*QGALTS	477	sp|Q5T5U3|RHG21_HUMAN	23259.8	30596.5	34890.6	29249.3	13098.4	1.39232e+06	30596.5	29249.3	0.198814	1.65545	-0.0649627	0	0.166667	0.440587	0.62019	0.440587	0.62019
SKSYDEGLDDYREDAK	sp|Q5T5U3|RHG21_HUMAN	Q5T5U3	ARHGAP21	Rho GTPase-activating protein 21 OS=Homo sapiens OX=9606 GN=ARHGAP21 PE=1 SV=2	87.86	0	53.4293	[3] Phospho (ST)	1	KTERSKS*YDEGLD	881	sp|Q5T5U3|RHG21_HUMAN	804969	631434	942551	293277	225022	228745	804969	228745	0.196605	0.154117	-1.81519	0	0	0.00164384	0.0358243	0.00164384	0.0358243
TGLSEGDGDKLK	sp|Q5T5U3|RHG21_HUMAN	Q5T5U3	ARHGAP21	Rho GTPase-activating protein 21 OS=Homo sapiens OX=9606 GN=ARHGAP21 PE=1 SV=2	36.95	0.000466592	43.4633	[4] Phospho (ST)	1	TRRTGLS*EGDGDK	10	sp|Q5T5U3|RHG21_HUMAN	1714.59	778.69	74.7881	6678.01	4517.64	7110.79	778.69	6678.01	0.960994	0.227654	3.1003	0	0	0.0225954	0.11488	0.0225954	0.11488
TQSPHSPKEESER	sp|Q5T5U3|RHG21_HUMAN	Q5T5U3	ARHGAP21	Rho GTPase-activating protein 21 OS=Homo sapiens OX=9606 GN=ARHGAP21 PE=1 SV=2	71.68	0.000220119	15.6832	[6] Phospho (ST)	1	KTQSPHS*PKEESE	1099	sp|Q5T5U3|RHG21_HUMAN	117678	210407	249737	104954	148404	830216	210407	148404	0.352037	1.12618	-0.50365	0	0	0.695367	0.815345	0.695367	0.815345
TQSPHSPKEESERK	sp|Q5T5U3|RHG21_HUMAN	Q5T5U3	ARHGAP21	Rho GTPase-activating protein 21 OS=Homo sapiens OX=9606 GN=ARHGAP21 PE=1 SV=2	10.28	0.00179406	13.8168	[6] Phospho (ST)	1	KTQSPHS*PKEESE	1099	sp|Q5T5U3|RHG21_HUMAN	10984.5	21111.3	14957	1013.53	5792.6	31946.1	14957	5792.6	0.325322	1.28909	-1.36854	0	0	0.310354	0.505991	0.310354	0.505991
TTSPPLSIPTTHLIHQPAGSR	sp|Q5T5U3|RHG21_HUMAN	Q5T5U3	ARHGAP21	Rho GTPase-activating protein 21 OS=Homo sapiens OX=9606 GN=ARHGAP21 PE=1 SV=2	10.79	0.00180832	90.4199	[2] Phospho (ST)	1	KTVSRTT*SPPLSI	318	sp|Q5T5U3|RHG21_HUMAN	74075	44608.2	60969.7	39678.5	32640.9	15904.6	60969.7	32640.9	0.246532	0.415268	-0.901409	0	0	0.0535332	0.186392	0.0535332	0.186392
TTSPPLSIPTTHLIHQPAGSR	sp|Q5T5U3|RHG21_HUMAN	Q5T5U3	ARHGAP21	Rho GTPase-activating protein 21 OS=Homo sapiens OX=9606 GN=ARHGAP21 PE=1 SV=2	29.71	0.000942063	90.4199	[3] Phospho (ST)	1	TVSRTTS*PPLSIP	319	sp|Q5T5U3|RHG21_HUMAN	1.20525e+06	979956	1.05316e+06	1.36141e+06	1.30318e+06	1.53282e+06	1.05316e+06	1.36141e+06	0.106464	0.0853198	0.37037	0	0	0.191254	0.385113	0.191254	0.385113
HYSQDCSSIK	sp|Q9P227|RHG23_HUMAN	Q9P227	ARHGAP23	Rho GTPase-activating protein 23 OS=Homo sapiens OX=9606 GN=ARHGAP23 PE=1 SV=2	43.88	0.000221926	25.6191	[3] Phospho (ST)	1	TLGRHYS*QDCSSI	598	sp|Q9P227|RHG23_HUMAN	179.193	924.943	86.5523	31719.3	97.9921	5370.01	179.193	5370.01	1.15809	1.36668	4.90534	0	0.333333	0.187936	0.381092	0.187936	0.381092
RHSTSDLSDATFSDIR	sp|Q9P227|RHG23_HUMAN	Q9P227	ARHGAP23	Rho GTPase-activating protein 23 OS=Homo sapiens OX=9606 GN=ARHGAP23 PE=1 SV=2	57.84	0.000156446	75.2388	[5] Phospho (ST)	1	SKRHSTS*DLSDAT	679	sp|Q9P227|RHG23_HUMAN	8806.48	6042.23	13733.3	32498.8	24248.6	37763.3	8806.48	32498.8	0.408915	0.216232	1.88375	0	0	0.00536564	0.0577556	0.00536564	0.0577556
RHSTSDLSDATFSDIRR	sp|Q9P227|RHG23_HUMAN	Q9P227	ARHGAP23	Rho GTPase-activating protein 23 OS=Homo sapiens OX=9606 GN=ARHGAP23 PE=1 SV=2	21.18	0.00137399	66.9615	[3] Phospho (ST)	1	APSKRHS*TSDLSD	677	sp|Q9P227|RHG23_HUMAN	1298.09	578.927	1913.93	4797.76	9520.36	178044	1298.09	9520.36	0.528761	1.53911	2.87463	0	0.333333	0.0299078	0.13363	0.0299078	0.13363
RPLSPETR	sp|Q9P227|RHG23_HUMAN	Q9P227	ARHGAP23	Rho GTPase-activating protein 23 OS=Homo sapiens OX=9606 GN=ARHGAP23 PE=1 SV=2	30.81	0.0008846	28.8647	[4] Phospho (ST)	1	RLRRPLS*PETRRR	1393	sp|Q9P227|RHG23_HUMAN	70123.9	80721.6	107848	128032	512071	163595	80721.6	163595	0.22563	0.792107	1.01911	0	0	0.0617331	0.200788	0.0617331	0.200788
RPSFSSHHLMPCDTLAR	sp|Q9P227|RHG23_HUMAN	Q9P227	ARHGAP23	Rho GTPase-activating protein 23 OS=Homo sapiens OX=9606 GN=ARHGAP23 PE=1 SV=2	52.13	0.000135814	75.0109	[6] Phospho (ST)	1	RRPSFSS*HHLMPC	1309	sp|Q9P227|RHG23_HUMAN	128.611	128.611	421.282	128.611	401.037	6235.73	128.611	401.037	0.747119	1.52985	1.64073	0.833333	0.5	0.269317	0.472821	0.269317	0.472821
RPSFSSHHLMPCDTLAR	sp|Q9P227|RHG23_HUMAN	Q9P227	ARHGAP23	Rho GTPase-activating protein 23 OS=Homo sapiens OX=9606 GN=ARHGAP23 PE=1 SV=2	38.14	0.000480908	65.2955	[6] Phospho (ST)|[10] Oxidation (M)	2	RRPSFSS*HHLMPC,FSSHHLM*PCDTLA	13091313	sp|Q9P227|RHG23_HUMAN	10971.8	7040.33	8253.26	23768.7	15957.7	33676.4	8253.26	23768.7	0.229949	0.362929	1.52603	0	0.333333	0.0110367	0.0787098	0.0110367	0.0787098
RSSYLLAITTER	sp|Q9P227|RHG23_HUMAN	Q9P227	ARHGAP23	Rho GTPase-activating protein 23 OS=Homo sapiens OX=9606 GN=ARHGAP23 PE=1 SV=2	51.17	0.000133014	89.692	[3] Phospho (ST)	1	KAGRRSS*YLLAIT	611	sp|Q9P227|RHG23_HUMAN	64.3053	5079.79	64.3053	1021.1	64.3053	48268	64.3053	1021.1	1.6679	1.67517	3.98904	0.666667	0.333333	0.446496	0.624123	0.446496	0.624123
SKSCDDGLNTFR	sp|Q9P227|RHG23_HUMAN	Q9P227	ARHGAP23	Rho GTPase-activating protein 23 OS=Homo sapiens OX=9606 GN=ARHGAP23 PE=1 SV=2	53.89	0.000141784	57.777	[3] Phospho (ST)	1	TTERSKS*CDDGLN	623	sp|Q9P227|RHG23_HUMAN	99967.3	129539	111934	113594	210656	45887.5	111934	113594	0.130698	0.671255	0.0212402	0	0	0.830523	0.904676	0.830523	0.904676
SSQDGDTPAQASPPEEK	sp|Q6ZUM4|RHG27_HUMAN	Q6ZUM4	ARHGAP27	Rho GTPase-activating protein 27 OS=Homo sapiens OX=9606 GN=ARHGAP27 PE=1 SV=3	38.03	0.000479662	35.2553	[12] Phospho (ST)	1	DTPAQAS*PPEEKV	466	sp|Q6ZUM4|RHG27_HUMAN	64.3053	64.3053	78991	81778.4	208888	258249	64.3053	208888	1.72783	0.497591	11.6655	0.666667	0	0.038463	0.154766	0.038463	0.154766
VDFGSSER	sp|Q6ZUM4|RHG27_HUMAN	Q6ZUM4	ARHGAP27	Rho GTPase-activating protein 27 OS=Homo sapiens OX=9606 GN=ARHGAP27 PE=1 SV=3	33.82	0.000518269	41.0589	[5] Phospho (ST)	1	SRVDFGS*SERLGS	632	sp|Q6ZUM4|RHG27_HUMAN	50294.1	15797.9	30869.1	170073	110349	64316.4	30869.1	110349	0.535076	0.461443	1.83784	0	0	0.0201617	0.108007	0.0201617	0.108007
AEEEHLSSSGGLAK	sp|Q52LW3|RHG29_HUMAN	Q52LW3	ARHGAP29	Rho GTPase-activating protein 29 OS=Homo sapiens OX=9606 GN=ARHGAP29 PE=1 SV=2	73	0.000227169	41.779	[9] Phospho (ST)	1	EEHLSSS*GGLAKN	357	sp|Q52LW3|RHG29_HUMAN	62339.3	233674	192213	56786.9	86230.9	788207	192213	86230.9	0.549265	1.33388	-1.15643	0	0	0.896939	0.943149	0.896939	0.943149
ATSFEESER	sp|Q52LW3|RHG29_HUMAN	Q52LW3	ARHGAP29	Rho GTPase-activating protein 29 OS=Homo sapiens OX=9606 GN=ARHGAP29 PE=1 SV=2	29.54	0.000939041	33.318	[2] Phospho (ST)	1	KIFERAT*SFEESE	948	sp|Q52LW3|RHG29_HUMAN	783286	1.03373e+06	1.02588e+06	273041	350371	490873	1.02588e+06	350371	0.15025	0.297317	-1.5499	0	0	0.00692212	0.0639612	0.00692212	0.0639612
ATSFEESERK	sp|Q52LW3|RHG29_HUMAN	Q52LW3	ARHGAP29	Rho GTPase-activating protein 29 OS=Homo sapiens OX=9606 GN=ARHGAP29 PE=1 SV=2	19.05	0.00157262	25.8452	[3] Phospho (ST)	1	IFERATS*FEESER	949	sp|Q52LW3|RHG29_HUMAN	91454.9	122681	79584.8	22241.1	5316	26574.5	91454.9	22241.1	0.227365	0.622571	-2.03983	0	0	0.00833284	0.0691136	0.00833284	0.0691136
EPPSPSETGPNSLGTFK	sp|Q52LW3|RHG29_HUMAN	Q52LW3	ARHGAP29	Rho GTPase-activating protein 29 OS=Homo sapiens OX=9606 GN=ARHGAP29 PE=1 SV=2	65.22	0.000188288	82.4863	[4] Phospho (ST)	1	DEREPPS*PSETGP	589	sp|Q52LW3|RHG29_HUMAN	141196	115498	105396	78941.5	132177	18492.9	115498	78941.5	0.152925	0.743169	-0.549013	0	0	0.220391	0.418539	0.220391	0.418539
ETKSFENVSVESVDSSSEK	sp|Q52LW3|RHG29_HUMAN	Q52LW3	ARHGAP29	Rho GTPase-activating protein 29 OS=Homo sapiens OX=9606 GN=ARHGAP29 PE=1 SV=2	83.27	0.000294377	69.5534	[4] Phospho (ST)	1	VSRETKS*FENVSV	171	sp|Q52LW3|RHG29_HUMAN	1627.76	3656.45	7746.48	64.3053	64.3053	64.3053	3656.45	64.3053	0.717542	0	-5.82936	0	1	0.000103013	0.00997539	0.000103013	0.00997539
HLNSSQPSGFGPANSLEDVVR	sp|Q52LW3|RHG29_HUMAN	Q52LW3	ARHGAP29	Rho GTPase-activating protein 29 OS=Homo sapiens OX=9606 GN=ARHGAP29 PE=1 SV=2	155.03	0	90.5605	[15] Phospho (ST)	1	GFGPANS*LEDVVR	499	sp|Q52LW3|RHG29_HUMAN	424004	386979	407389	377730	192245	313838	407389	313838	0.0456631	0.31984	-0.376385	0	0	0.183732	0.375786	0.183732	0.375786
IEEDRCSNSADITGPSFIR	sp|Q52LW3|RHG29_HUMAN	Q52LW3	ARHGAP29	Rho GTPase-activating protein 29 OS=Homo sapiens OX=9606 GN=ARHGAP29 PE=1 SV=2	69.26	0.000205719	86.341	[9] Phospho (ST)	1	EDRCSNS*ADITGP	521	sp|Q52LW3|RHG29_HUMAN	910974	864235	814404	1.06678e+06	348205	216894	864235	348205	0.0559468	0.841072	-1.31149	0	0	0.164027	0.351194	0.164027	0.351194
LPDSSNKIEEDRCSNSADITGPSFIR	sp|Q52LW3|RHG29_HUMAN	Q52LW3	ARHGAP29	Rho GTPase-activating protein 29 OS=Homo sapiens OX=9606 GN=ARHGAP29 PE=1 SV=2	28.67	0.000997085	86.4261	[14] Phospho (ST)	1	IEEDRCS*NSADIT	519	sp|Q52LW3|RHG29_HUMAN	1.21543e+06	1.08724e+06	1.24982e+06	1.9462e+06	1.1147e+06	2.32112e+06	1.21543e+06	1.9462e+06	0.0723573	0.344169	0.67919	0	0	0.191692	0.385617	0.191692	0.385617
LPDSSNKIEEDRCSNSADITGPSFIR	sp|Q52LW3|RHG29_HUMAN	Q52LW3	ARHGAP29	Rho GTPase-activating protein 29 OS=Homo sapiens OX=9606 GN=ARHGAP29 PE=1 SV=2	11.75	0.00183466	86.4261	[16] Phospho (ST)	1	EDRCSNS*ADITGP	521	sp|Q52LW3|RHG29_HUMAN	75895.2	106807	110616	98252.3	67385.3	38388.4	106807	67385.3	0.194759	0.440191	-0.664499	0	0	0.214246	0.412504	0.214246	0.412504
PLLSPEER	sp|Q52LW3|RHG29_HUMAN	Q52LW3	ARHGAP29	Rho GTPase-activating protein 29 OS=Homo sapiens OX=9606 GN=ARHGAP29 PE=1 SV=2	39.85	0.000501354	65.0202	[4] Phospho (ST)	1	FPKPLLS*PEERDI	913	sp|Q52LW3|RHG29_HUMAN	134750	121605	115255	82329.4	48852.5	45580.8	121605	48852.5	0.0802689	0.345179	-1.31569	0	0	0.0164769	0.0972347	0.0164769	0.0972347
RSSDSYPLAPVR	sp|Q52LW3|RHG29_HUMAN	Q52LW3	ARHGAP29	Rho GTPase-activating protein 29 OS=Homo sapiens OX=9606 GN=ARHGAP29 PE=1 SV=2	43.09	0.000217391	69.7115	[3] Phospho (ST)	1	ASERRSS*DSYPLA	1144	sp|Q52LW3|RHG29_HUMAN	769686	1.00312e+06	895786	220813	258693	207762	895786	220813	0.131353	0.115479	-2.02033	0	0	0.000435686	0.0198085	0.000435686	0.0198085
SFENVSVESVDSSSEK	sp|Q52LW3|RHG29_HUMAN	Q52LW3	ARHGAP29	Rho GTPase-activating protein 29 OS=Homo sapiens OX=9606 GN=ARHGAP29 PE=1 SV=2	71.76	0.000220313	73.0481	[6] Phospho (ST)|[9] Phospho (ST)	2	KSFENVS*VESVDS,ENVSVES*VDSSSE	176179	sp|Q52LW3|RHG29_HUMAN	33964.1	65308.5	59063.3	41292.7	43490.1	127209	59063.3	43490.1	0.31434	0.693164	-0.441578	0	0	0.652512	0.78636	0.652512	0.78636
SFENVSVESVDSSSEK	sp|Q52LW3|RHG29_HUMAN	Q52LW3	ARHGAP29	Rho GTPase-activating protein 29 OS=Homo sapiens OX=9606 GN=ARHGAP29 PE=1 SV=2	24.77	0.00126796	73.9465	[9] Phospho (ST)|[12] Phospho (ST)	2	ENVSVES*VDSSSE,SVESVDS*SSEKGN	179182	sp|Q52LW3|RHG29_HUMAN	64.3053	64.3053	2094.49	2947.45	379.778	7994.8	64.3053	2947.45	1.58175	1.02655	5.51839	0.666667	0	0.117272	0.288279	0.117272	0.288279
SLDSESISPGDFHR	sp|Q52LW3|RHG29_HUMAN	Q52LW3	ARHGAP29	Rho GTPase-activating protein 29 OS=Homo sapiens OX=9606 GN=ARHGAP29 PE=1 SV=2	44.61	0.000226116	78.0249	[8] Phospho (ST)	1	LDSESIS*PGDFHR	559	sp|Q52LW3|RHG29_HUMAN	3796.41	14949	14421.8	7174.51	2859.72	3716.54	14421.8	3716.54	0.569142	0.498372	-1.95622	0	0	0.150056	0.333281	0.150056	0.333281
SLFFSSKEDIHTSESESK	sp|Q52LW3|RHG29_HUMAN	Q52LW3	ARHGAP29	Rho GTPase-activating protein 29 OS=Homo sapiens OX=9606 GN=ARHGAP29 PE=1 SV=2	91.78	0	82.4392	[6] Phospho (ST)	1	KSLFFSS*KEDIHT	930	sp|Q52LW3|RHG29_HUMAN	470808	433086	405515	473055	363308	285019	433086	363308	0.0750973	0.252695	-0.253463	0	0.166667	0.43498	0.616001	0.43498	0.616001
SSDSYPLAPVR	sp|Q52LW3|RHG29_HUMAN	Q52LW3	ARHGAP29	Rho GTPase-activating protein 29 OS=Homo sapiens OX=9606 GN=ARHGAP29 PE=1 SV=2	51.63	0.000134517	79.8318	[2] Phospho (ST)	1	ASERRSS*DSYPLA	1144	sp|Q52LW3|RHG29_HUMAN	4038.11	5298.02	3191.56	1117.31	10830.1	1317.85	4038.11	1317.85	0.25383	1.25532	-1.6155	0	0.333333	0.486417	0.656914	0.486417	0.656914
STNNVERHTPR	sp|Q52LW3|RHG29_HUMAN	Q52LW3	ARHGAP29	Rho GTPase-activating protein 29 OS=Homo sapiens OX=9606 GN=ARHGAP29 PE=1 SV=2	40.78	0.000410425	14.833	[9] Phospho (ST)	1	NNVERHT*PRTKIR	1010	sp|Q52LW3|RHG29_HUMAN	5331.83	1190.71	671.989	691.87	2017.23	3926.25	1190.71	2017.23	1.0649	0.735128	0.760546	0	0.166667	0.908479	0.949608	0.908479	0.949608
TPKPLSLK	sp|Q52LW3|RHG29_HUMAN	Q52LW3	ARHGAP29	Rho GTPase-activating protein 29 OS=Homo sapiens OX=9606 GN=ARHGAP29 PE=1 SV=2	22.03	0.00139683	58.5511	[6] Phospho (ST)	1	KTPKPLS*LKSDRS	996	sp|Q52LW3|RHG29_HUMAN	10205.7	11765.5	13913.4	4208.4	2265.48	1697.83	11765.5	2265.48	0.155633	0.483339	-2.37667	0	0	0.00216152	0.0400311	0.00216152	0.0400311
TPSSGTMSSADDLDEREPPSPSETGPNSLGTFK	sp|Q52LW3|RHG29_HUMAN	Q52LW3	ARHGAP29	Rho GTPase-activating protein 29 OS=Homo sapiens OX=9606 GN=ARHGAP29 PE=1 SV=2	12.55	0.00185769	85.9433	[3] Phospho (ST)|[7] Oxidation (M)	2	KLPRTPS*SGTMSS,TPSSGTM*SSADDL	572576	sp|Q52LW3|RHG29_HUMAN	463585	409066	517670	288266	263433	22293.2	463585	263433	0.117171	0.767866	-0.815401	0	0	0.116402	0.286943	0.116402	0.286943
EAGEMESSTLQESPR	sp|Q2M1Z3|RHG31_HUMAN	Q2M1Z3	ARHGAP31	Rho GTPase-activating protein 31 OS=Homo sapiens OX=9606 GN=ARHGAP31 PE=1 SV=2	57.07	0.000153351	51.2259	[13] Phospho (ST)	1	SSTLQES*PRARAE	629	sp|Q2M1Z3|RHG31_HUMAN	264053	421467	325703	44372.6	60829.6	51988.3	325703	51988.3	0.235321	0.157187	-2.6473	0	0	0.000186511	0.0140042	0.000186511	0.0140042
EAGEMESSTLQESPR	sp|Q2M1Z3|RHG31_HUMAN	Q2M1Z3	ARHGAP31	Rho GTPase-activating protein 31 OS=Homo sapiens OX=9606 GN=ARHGAP31 PE=1 SV=2	58.23	0.000157654	37.3086	[5] Oxidation (M)|[13] Phospho (ST)	2	GREAGEM*ESSTLQ,SSTLQES*PRARAE	621629	sp|Q2M1Z3|RHG31_HUMAN	273220	277197	219661	19074.3	82.4882	1079.04	273220	1079.04	0.125177	1.58465	-7.98418	0	0	0.00815748	0.068528	0.00815748	0.068528
ELGTHLGHSSPQIR	sp|Q2M1Z3|RHG31_HUMAN	Q2M1Z3	ARHGAP31	Rho GTPase-activating protein 31 OS=Homo sapiens OX=9606 GN=ARHGAP31 PE=1 SV=2	10.24	0.0017925	52.4673	[10] Phospho (ST)	1	THLGHSS*PQIRQG	1054	sp|Q2M1Z3|RHG31_HUMAN	28017.7	54564.9	40205.6	380.378	64.3053	64.3053	40205.6	64.3053	0.324667	1.07557	-9.28824	0	0.666667	6.54e-05	0.00791059	6.54e-05	0.00791059
ESSPSVQDSTSPGEHPAK	sp|Q2M1Z3|RHG31_HUMAN	Q2M1Z3	ARHGAP31	Rho GTPase-activating protein 31 OS=Homo sapiens OX=9606 GN=ARHGAP31 PE=1 SV=2	21.59	0.00138449	31.2546	[11] Phospho (ST)	1	SVQDSTS*PGEHPA	1080	sp|Q2M1Z3|RHG31_HUMAN	124256	131231	86787.5	1138.83	662.096	5343.78	124256	1138.83	0.209497	1.08181	-6.76962	0	0	0.000387412	0.0192362	0.000387412	0.0192362
GCGFPSPTR	sp|Q2M1Z3|RHG31_HUMAN	Q2M1Z3	ARHGAP31	Rho GTPase-activating protein 31 OS=Homo sapiens OX=9606 GN=ARHGAP31 PE=1 SV=2	20.41	0.00148253	54.1527	[6] Phospho (ST)	1	KGCGFPS*PTREVE	863	sp|Q2M1Z3|RHG31_HUMAN	570323	357754	365648	7137.14	403074	1.38612e+06	365648	403074	0.279454	1.18578	0.140588	0	0.333333	0.501754	0.670275	0.501754	0.670275
MHSTGTGSSCDLTK	sp|Q2M1Z3|RHG31_HUMAN	Q2M1Z3	ARHGAP31	Rho GTPase-activating protein 31 OS=Homo sapiens OX=9606 GN=ARHGAP31 PE=1 SV=2	50.19	0.000129618	29.253	[8] Phospho (ST)	1	HSTGTGS*SCDLTK	387	sp|Q2M1Z3|RHG31_HUMAN	43316.7	61976.5	60287.7	13432.5	97.8749	34595	60287.7	13432.5	0.186984	1.08441	-2.16613	0	0.333333	0.13242	0.30879	0.13242	0.30879
QSHSLDSKPTVK	sp|Q2M1Z3|RHG31_HUMAN	Q2M1Z3	ARHGAP31	Rho GTPase-activating protein 31 OS=Homo sapiens OX=9606 GN=ARHGAP31 PE=1 SV=2	46.91	0.000119076	25.565	[4] Phospho (ST)	1	SLRQSHS*LDSKPT	954	sp|Q2M1Z3|RHG31_HUMAN	349319	364413	288904	2416.93	32529.3	1819.76	349319	2416.93	0.119557	1.43287	-7.17523	0	0.666667	0.00242124	0.0419087	0.00242124	0.0419087
RNSAPVSVSAVR	sp|Q2M1Z3|RHG31_HUMAN	Q2M1Z3	ARHGAP31	Rho GTPase-activating protein 31 OS=Homo sapiens OX=9606 GN=ARHGAP31 PE=1 SV=2	18.38	0.00155251	54.1527	[3] Phospho (ST)	1	LTGRRNS*APVSVS	1178	sp|Q2M1Z3|RHG31_HUMAN	1.01412e+06	860672	895308	46348.7	40314.2	2866.88	895308	40314.2	0.087158	0.789333	-4.47302	0	0	0.00282174	0.0447024	0.00282174	0.0447024
SMDSLCSVPVEGK	sp|Q2M1Z3|RHG31_HUMAN	Q2M1Z3	ARHGAP31	Rho GTPase-activating protein 31 OS=Homo sapiens OX=9606 GN=ARHGAP31 PE=1 SV=2	67.75	0.000198177	69.7462	[1] Phospho (ST)|[2] Oxidation (M)	2	TIRPAKS*MDSLCS,IRPAKSM*DSLCSV	346347	sp|Q2M1Z3|RHG31_HUMAN	119850	114688	169589	24333	5901.1	4964.67	119850	5901.1	0.225055	0.930887	-4.34411	0	0	0.00149838	0.0347192	0.00149838	0.0347192
DAETGSSQCQTPGSTASSEPVSPLQEK	sp|A7KAX9|RHG32_HUMAN	A7KAX9	ARHGAP32	Rho GTPase-activating protein 32 OS=Homo sapiens OX=9606 GN=ARHGAP32 PE=1 SV=1	64.72	0.000186185	65.0702	[22] Phospho (ST)	1	ASSEPVS*PLQEKL	856	sp|A7KAX9|RHG32_HUMAN	664294	496406	571751	579510	354295	278886	571751	354295	0.145616	0.38693	-0.690435	0	0	0.172684	0.362412	0.172684	0.362412
LHHPLEFADKSPTPPNLPSDK	sp|A7KAX9|RHG32_HUMAN	A7KAX9	ARHGAP32	Rho GTPase-activating protein 32 OS=Homo sapiens OX=9606 GN=ARHGAP32 PE=1 SV=1	13.65	0.00183297	78.6448	[11] Phospho (ST)	1	LEFADKS*PTPPNL	1234	sp|A7KAX9|RHG32_HUMAN	1637.81	10256.3	4296.39	64.3053	64.3053	24582.9	4296.39	64.3053	0.817768	1.71853	-6.06204	0	0.666667	0.258737	0.461663	0.258737	0.461663
SAKSEESLTSLHAVDGDSK	sp|A7KAX9|RHG32_HUMAN	A7KAX9	ARHGAP32	Rho GTPase-activating protein 32 OS=Homo sapiens OX=9606 GN=ARHGAP32 PE=1 SV=1	20.3	0.00147986	67.2025	[4] Phospho (ST)|[7] Phospho (ST)	2	TLRSAKS*EESLTS,SAKSEES*LTSLHA	706709	sp|A7KAX9|RHG32_HUMAN	3707.22	4160.83	7167.78	4126.04	14951.3	32300.9	4160.83	14951.3	0.37525	0.82989	1.84533	0	0.333333	0.139365	0.318512	0.139365	0.318512
VVYAFSPK	sp|A7KAX9|RHG32_HUMAN	A7KAX9	ARHGAP32	Rho GTPase-activating protein 32 OS=Homo sapiens OX=9606 GN=ARHGAP32 PE=1 SV=1	22.31	0.00140431	77.1977	[6] Phospho (ST)	1	KVVYAFS*PKIGRK	892	sp|A7KAX9|RHG32_HUMAN	73377.9	66086.7	61128.6	45606.6	29831	7700.87	66086.7	29831	0.0921498	0.687098	-1.14755	0	0	0.0638571	0.204455	0.0638571	0.204455
SAKSEESLSSQASGAGLQR	sp|O14559|RHG33_HUMAN	O14559	ARHGAP33	Rho GTPase-activating protein 33 OS=Homo sapiens OX=9606 GN=ARHGAP33 PE=1 SV=2	129.7	0	53.3199	[4] Phospho (ST)	1	TLRSAKS*EESLSS	636	sp|O14559|RHG33_HUMAN	159205	120557	170283	168900	95807.7	91222.1	159205	95807.7	0.174023	0.367354	-0.732676	0	0	0.33231	0.526739	0.33231	0.526739
AGSPLCNSNLQDSEEDIEPSYSLFR	sp|Q9NRY4|RHG35_HUMAN	Q9NRY4	ARHGAP35	Rho GTPase-activating protein 35 OS=Homo sapiens OX=9606 GN=ARHGAP35 PE=1 SV=3	60.2	0.000165453	97.8302	[3] Phospho (ST)	1	NSPRAGS*PLCNSN	975	sp|Q9NRY4|RHG35_HUMAN	355517	345078	402152	317997	120182	200840	355517	200840	0.0826748	0.466968	-0.823872	0	0	0.080032	0.232379	0.080032	0.232379
AQSNGSGNGSDSEMDTSSLER	sp|Q9NRY4|RHG35_HUMAN	Q9NRY4	ARHGAP35	Rho GTPase-activating protein 35 OS=Homo sapiens OX=9606 GN=ARHGAP35 PE=1 SV=3	161.38	0	51.3793	[10] Phospho (ST)	1	NGSGNGS*DSEMDT	1134	sp|Q9NRY4|RHG35_HUMAN	60849.6	76200.8	54007.2	46578.3	45289.5	723727	60849.6	46578.3	0.178461	1.43941	-0.385588	0	0	0.48081	0.651763	0.48081	0.651763
AQSNGSGNGSDSEMDTSSLER	sp|Q9NRY4|RHG35_HUMAN	Q9NRY4	ARHGAP35	Rho GTPase-activating protein 35 OS=Homo sapiens OX=9606 GN=ARHGAP35 PE=1 SV=3	152.4	0	34.5919	[10] Phospho (ST)|[14] Oxidation (M)	2	NGSGNGS*DSEMDT,NGSDSEM*DTSSLE	11341138	sp|Q9NRY4|RHG35_HUMAN	64.3053	3498.26	64.3053	64.3053	18634.2	64.3053	64.3053	64.3053	1.63992	1.71424	0	0.666667	0.666667	0.786332	0.876016	0.786332	0.876016
KVSIVSKPVLYR	sp|Q9NRY4|RHG35_HUMAN	Q9NRY4	ARHGAP35	Rho GTPase-activating protein 35 OS=Homo sapiens OX=9606 GN=ARHGAP35 PE=1 SV=3	48.69	0.000125047	75.1448	[3] Phospho (ST)	1	ERGRKVS*IVSKPV	1150	sp|Q9NRY4|RHG35_HUMAN	23857.6	35785.8	34736.9	42519.8	14560.1	23107.4	34736.9	23107.4	0.209943	0.536022	-0.588112	0	0	0.488325	0.658872	0.488325	0.658872
NEEENIYSVPHDSTQGK	sp|Q9NRY4|RHG35_HUMAN	Q9NRY4	ARHGAP35	Rho GTPase-activating protein 35 OS=Homo sapiens OX=9606 GN=ARHGAP35 PE=1 SV=3	131.23	0	49.1275	[7] Phospho (Y)	1	NEEENIY*SVPHDS	1105	sp|Q9NRY4|RHG35_HUMAN	94787.1	106488	112621	45580	49972.8	764093	106488	49972.8	0.0865975	1.44329	-1.09148	0	0	0.865284	0.924805	0.865284	0.924805
NIIEATHMYDNAAEACSTTEEVFNSPR	sp|Q9NRY4|RHG35_HUMAN	Q9NRY4	ARHGAP35	Rho GTPase-activating protein 35 OS=Homo sapiens OX=9606 GN=ARHGAP35 PE=1 SV=3	101.43	0	93.2605	[25] Phospho (ST)	1	TEEVFNS*PRAGSP	970	sp|Q9NRY4|RHG35_HUMAN	477975	739321	783213	443972	164984	417844	739321	417844	0.247474	0.450194	-0.823238	0	0	0.0789107	0.230441	0.0789107	0.230441
NQKNSLSDPNIDR	sp|Q9NRY4|RHG35_HUMAN	Q9NRY4	ARHGAP35	Rho GTPase-activating protein 35 OS=Homo sapiens OX=9606 GN=ARHGAP35 PE=1 SV=3	114.29	0	42.4498	[5] Phospho (ST)	1	DRNQKNS*LSDPNI	589	sp|Q9NRY4|RHG35_HUMAN	227049	285914	222322	181868	51602.8	64108.5	227049	64108.5	0.144554	0.724558	-1.82442	0	0	0.0318981	0.139387	0.0318981	0.139387
SVSSSPWLPQDGFDPSDYAEPMDAVVKPR	sp|Q9NRY4|RHG35_HUMAN	Q9NRY4	ARHGAP35	Rho GTPase-activating protein 35 OS=Homo sapiens OX=9606 GN=ARHGAP35 PE=1 SV=3	24.58	0.00133184	97.0628	[1] Phospho (ST)|[22] Oxidation (M)	2	RDGQRKS*VSSSPW,SDYAEPM*DAVVKP	10701091	sp|Q9NRY4|RHG35_HUMAN	48955.2	69205.3	53787.3	183664	178485	202077	53787.3	183664	0.184524	0.065928	1.77173	0	0	0.000903074	0.027461	0.000903074	0.027461
TSFSVGSDDELGPIR	sp|Q9NRY4|RHG35_HUMAN	Q9NRY4	ARHGAP35	Rho GTPase-activating protein 35 OS=Homo sapiens OX=9606 GN=ARHGAP35 PE=1 SV=3	81.76	0.000284333	93.6769	[7] Phospho (ST)	1	TSFSVGS*DDELGP	1179	sp|Q9NRY4|RHG35_HUMAN	583614	549584	594092	631185	337732	245053	583614	337732	0.0404147	0.498146	-0.789135	0	0	0.186106	0.378753	0.186106	0.378753
AELPGSSSPLLAQPR	sp|Q9C0H5|RHG39_HUMAN	Q9C0H5	ARHGAP39	Rho GTPase-activating protein 39 OS=Homo sapiens OX=9606 GN=ARHGAP39 PE=1 SV=2	64.24	0.000183959	87.604	[8] Phospho (ST)	1	ELPGSSS*PLLAQP	286	sp|Q9C0H5|RHG39_HUMAN	24614.4	9145.11	29943.3	43457.9	18043.7	354.314	24614.4	18043.7	0.508765	1.05084	-0.448009	0	0	0.446164	0.624089	0.446164	0.624089
KPSSETDIENWASK	sp|Q9C0H5|RHG39_HUMAN	Q9C0H5	ARHGAP39	Rho GTPase-activating protein 39 OS=Homo sapiens OX=9606 GN=ARHGAP39 PE=1 SV=2	49.12	0.000126566	72.2211	[4] Phospho (ST)	1	TLRKPSS*ETDIEN	690	sp|Q9C0H5|RHG39_HUMAN	84102.8	91480.2	107840	165250	14071.3	223262	91480.2	165250	0.128592	0.804786	0.853115	0	0	0.84436	0.912057	0.84436	0.912057
QGPPSPCQQLVLTK	sp|Q9C0H5|RHG39_HUMAN	Q9C0H5	ARHGAP39	Rho GTPase-activating protein 39 OS=Homo sapiens OX=9606 GN=ARHGAP39 PE=1 SV=2	50.75	0.000131562	82.6549	[5] Phospho (ST)	1	NKQGPPS*PCQQLV	366	sp|Q9C0H5|RHG39_HUMAN	104581	137178	110093	96256	37565.5	164992	110093	96256	0.148766	0.640325	-0.193772	0	0	0.456809	0.631829	0.456809	0.631829
QLVYVEQAGSSPK	sp|Q9C0H5|RHG39_HUMAN	Q9C0H5	ARHGAP39	Rho GTPase-activating protein 39 OS=Homo sapiens OX=9606 GN=ARHGAP39 PE=1 SV=2	54.82	0.000144991	70.3048	[11] Phospho (ST)	1	VEQAGSS*PKLRAG	407	sp|Q9C0H5|RHG39_HUMAN	193347	34947.4	39846.3	50148.5	42670.4	120742	39846.3	50148.5	1.00773	0.605146	0.331762	0	0	0.981378	0.990295	0.981378	0.990295
RAELPGSSSPLLAQPR	sp|Q9C0H5|RHG39_HUMAN	Q9C0H5	ARHGAP39	Rho GTPase-activating protein 39 OS=Homo sapiens OX=9606 GN=ARHGAP39 PE=1 SV=2	45.4	0.000115194	81.6839	[9] Phospho (ST)	1	ELPGSSS*PLLAQP	286	sp|Q9C0H5|RHG39_HUMAN	90389.1	100175	119557	121596	88770.7	837389	100175	121596	0.143601	1.21133	0.279565	0	0	0.299352	0.496706	0.299352	0.496706
RPSPFLK	sp|Q9C0H5|RHG39_HUMAN	Q9C0H5	ARHGAP39	Rho GTPase-activating protein 39 OS=Homo sapiens OX=9606 GN=ARHGAP39 PE=1 SV=2	20.24	0.00147824	54.9473	[3] Phospho (ST)	1	FPERRPS*PFLKRA	273	sp|Q9C0H5|RHG39_HUMAN	17823.2	21362.2	15114.2	3334.58	689.385	34488.1	17823.2	3334.58	0.173103	1.46422	-2.41818	0	0	0.197825	0.392866	0.197825	0.392866
YAPNPGGGSYSLQPSPCLLR	sp|Q9C0H5|RHG39_HUMAN	Q9C0H5	ARHGAP39	Rho GTPase-activating protein 39 OS=Homo sapiens OX=9606 GN=ARHGAP39 PE=1 SV=2	44.41	0.00022477	94.5029	[15] Phospho (ST)	1	SYSLQPS*PCLLRD	432	sp|Q9C0H5|RHG39_HUMAN	91945.7	182180	92776.2	294642	154007	789369	92776.2	294642	0.424028	0.808683	1.66714	0	0	0.0724862	0.219491	0.0724862	0.219491
CLVPASPEQHVEVDK	sp|P98171|RHG04_HUMAN	P98171	ARHGAP4	Rho GTPase-activating protein 4 OS=Homo sapiens OX=9606 GN=ARHGAP4 PE=1 SV=2	36.88	0.00046581	74.7919	[6] Phospho (ST)	1	RCLVPAS*PEQHVE	860	sp|P98171|RHG04_HUMAN	48425.7	66676	67670.6	69928	31304.8	42244.2	66676	42244.2	0.17785	0.416248	-0.658414	0	0	0.336153	0.530192	0.336153	0.530192
GPGAPASPSASHPQGLDTTPKPH	sp|P98171|RHG04_HUMAN	P98171	ARHGAP4	Rho GTPase-activating protein 4 OS=Homo sapiens OX=9606 GN=ARHGAP4 PE=1 SV=2	102.65	0	53.1317	[7] Phospho (ST)	1	GPGAPAS*PSASHP	930	sp|P98171|RHG04_HUMAN	3.5166e+06	5.70766e+06	4.05556e+06	3.1275e+06	806310	1.49152e+06	4.05556e+06	1.49152e+06	0.257914	0.659464	-1.44311	0	0.111111	0.0412393	0.160499	0.0412393	0.160499
QGLGPASTTSPSPGPRSPK	sp|P98171|RHG04_HUMAN	P98171	ARHGAP4	Rho GTPase-activating protein 4 OS=Homo sapiens OX=9606 GN=ARHGAP4 PE=1 SV=2	46.72	0.000118469	52.2709	[17] Phospho (ST)	1	PSPGPRS*PKAPPS	906	sp|P98171|RHG04_HUMAN	1.87183e+06	1.53966e+06	1.80833e+06	929669	735059	649356	1.80833e+06	735059	0.10134	0.186215	-1.29873	0	0	0.00614987	0.0612698	0.00614987	0.0612698
QVVGAGLQTAGESGSSPEGLLASELVHRPEPCTSPEAMGPSGHR	sp|P98171|RHG04_HUMAN	P98171	ARHGAP4	Rho GTPase-activating protein 4 OS=Homo sapiens OX=9606 GN=ARHGAP4 PE=1 SV=2	19.14	0.0015754	95.0404	[34] Phospho (ST)|[38] Oxidation (M)	2	RPEPCTS*PEAMGP,CTSPEAM*GPSGHR	842846	sp|P98171|RHG04_HUMAN	2.05077e+06	2.35111e+06	2.10828e+06	2.18004e+06	1.58356e+06	1.83688e+06	2.10828e+06	1.83688e+06	0.0734607	0.160361	-0.198805	0	0	0.427398	0.610475	0.427398	0.610475
KSSFNVSDVARPEAAGSPPEEGGCTEGTPAK	sp|Q92619|HMHA1_HUMAN	Q92619	ARHGAP45	Rho GTPase-activating protein 45 OS=Homo sapiens OX=9606 GN=ARHGAP45 PE=1 SV=2	35.13	0.000535332	76.7664	[3] Phospho (ST)	1	MRARKSS*FNVSDV	578	sp|Q92619|HMHA1_HUMAN	484614	434353	423165	188824	50845.9	131146	434353	131146	0.0731579	0.560635	-1.72769	0	0	0.00979587	0.0738529	0.00979587	0.0738529
ESTHQSEDVFLPSPR	sp|Q13017|RHG05_HUMAN	Q13017	ARHGAP5	Rho GTPase-activating protein 5 OS=Homo sapiens OX=9606 GN=ARHGAP5 PE=1 SV=2	27.3	0.00103996	81.7335	[13] Phospho (ST)	1	EDVFLPS*PRDCFP	968	sp|Q13017|RHG05_HUMAN	21674.9	52031.5	48072.2	38078.7	1775.34	22649.5	48072.2	22649.5	0.40654	0.874491	-1.08572	0	0	0.214913	0.412904	0.214913	0.412904
GGIDNPAITSDQELDDKK	sp|Q13017|RHG05_HUMAN	Q13017	ARHGAP5	Rho GTPase-activating protein 5 OS=Homo sapiens OX=9606 GN=ARHGAP5 PE=1 SV=2	106.81	0	67.3357	[10] Phospho (ST)	1	DNPAITS*DQELDD	1218	sp|Q13017|RHG05_HUMAN	2.23974e+06	2.5855e+06	2.37116e+06	1.93401e+06	1.28421e+06	126888	2.37116e+06	1.28421e+06	0.0727587	0.820925	-0.884708	0	0	0.141646	0.321734	0.141646	0.321734
HNLDVVSPIPANK	sp|Q13017|RHG05_HUMAN	Q13017	ARHGAP5	Rho GTPase-activating protein 5 OS=Homo sapiens OX=9606 GN=ARHGAP5 PE=1 SV=2	60.24	0.000165645	75.9232	[7] Phospho (ST)	1	HNLDVVS*PIPANK	765	sp|Q13017|RHG05_HUMAN	34631.3	46703.8	32139.2	43093.3	19653.6	317374	34631.3	43093.3	0.205943	1.30646	0.315387	0	0	0.480475	0.651605	0.480475	0.651605
HRGSEEDPLLSPVETWK	sp|Q13017|RHG05_HUMAN	Q13017	ARHGAP5	Rho GTPase-activating protein 5 OS=Homo sapiens OX=9606 GN=ARHGAP5 PE=1 SV=2	49.5	0.000127665	93.3074	[4] Phospho (ST)	1	KGRHRGS*EEDPLL	1195	sp|Q13017|RHG05_HUMAN	209376	255909	265325	364222	339059	468165	255909	364222	0.123004	0.175274	0.509186	0	0	0.0544343	0.188076	0.0544343	0.188076
RTHSDASDDEAFTTSK	sp|Q13017|RHG05_HUMAN	Q13017	ARHGAP5	Rho GTPase-activating protein 5 OS=Homo sapiens OX=9606 GN=ARHGAP5 PE=1 SV=2	84.22	0.000301932	30.9565	[4] Phospho (ST)	1	YYRRTHS*DASDDE	1173	sp|Q13017|RHG05_HUMAN	267796	252574	174961	498781	215392	529850	252574	498781	0.214815	0.417872	0.981697	0	0	0.151393	0.335312	0.151393	0.335312
RTHSDASDDEAFTTSK	sp|Q13017|RHG05_HUMAN	Q13017	ARHGAP5	Rho GTPase-activating protein 5 OS=Homo sapiens OX=9606 GN=ARHGAP5 PE=1 SV=2	88.03	0	34.3111	[4] Phospho (ST)|[7] Phospho (ST)	2	YYRRTHS*DASDDE,RTHSDAS*DDEAFT	11731176	sp|Q13017|RHG05_HUMAN	1.77595e+06	1.87933e+06	2.11931e+06	937339	899101	1.03028e+06	1.87933e+06	937339	0.0915132	0.0706016	-1.00357	0	0	0.00763662	0.0667563	0.00763662	0.0667563
THSDASDDEAFTTSK	sp|Q13017|RHG05_HUMAN	Q13017	ARHGAP5	Rho GTPase-activating protein 5 OS=Homo sapiens OX=9606 GN=ARHGAP5 PE=1 SV=2	70.97	0.000215889	40.753	[3] Phospho (ST)|[6] Phospho (ST)	2	YYRRTHS*DASDDE,RTHSDAS*DDEAFT	11731176	sp|Q13017|RHG05_HUMAN	1.08348e+06	1.05585e+06	1.58959e+06	1.18811e+06	903959	523238	1.08348e+06	903959	0.241757	0.382673	-0.261348	0	0	0.220195	0.418352	0.220195	0.418352
DGDGVPGGGPLSPAR	sp|Q92888|ARHG1_HUMAN	Q92888	ARHGEF1	Rho guanine nucleotide exchange factor 1 OS=Homo sapiens OX=9606 GN=ARHGEF1 PE=1 SV=2	28.78	0.000999231	67.6201	[12] Phospho (ST)	1	PGGGPLS*PARTQE	863	sp|Q92888|ARHG1_HUMAN	112447	166865	159591	348765	234318	27105.1	159591	234318	0.201934	0.80161	0.554085	0	0	0.890581	0.939483	0.890581	0.939483
KVLSLK	sp|Q92888|ARHG1_HUMAN	Q92888	ARHGEF1	Rho guanine nucleotide exchange factor 1 OS=Homo sapiens OX=9606 GN=ARHGEF1 PE=1 SV=2	33.25	0.00076746	52.7215	[4] Phospho (ST)	1	ALRKVLS*LKQLLF	833	sp|Q92888|ARHG1_HUMAN	983.068	128.611	1315.99	128.611	1194.02	128.611	983.068	128.611	0.756876	1.27156	-2.93428	0.666667	0.833333	0.460057	0.634773	0.460057	0.634773
PKPRPSPSSTR	sp|Q92888|ARHG1_HUMAN	Q92888	ARHGEF1	Rho guanine nucleotide exchange factor 1 OS=Homo sapiens OX=9606 GN=ARHGEF1 PE=1 SV=2	33.56	0.000601323	16.6088	[6] Phospho (ST)	1	RPKPRPS*PSSTRE	776	sp|Q92888|ARHG1_HUMAN	24252.6	47315	30070.6	11632.4	13073.8	18662.9	30070.6	13073.8	0.354011	0.256884	-1.20167	0	0	0.0210012	0.110516	0.0210012	0.110516
KQLSHDLTR	sp|O15013|ARHGA_HUMAN	O15013	ARHGEF10	Rho guanine nucleotide exchange factor 10 OS=Homo sapiens OX=9606 GN=ARHGEF10 PE=1 SV=4	32.94	0.000761615	25.73	[4] Phospho (ST)	1	NHKKQLS*HDLTRL	308	sp|O15013|ARHGA_HUMAN	28528	17561.9	11114.6	19145.1	10508.5	197500	17561.9	19145.1	0.461706	1.39405	0.124532	0	0.333333	0.450054	0.626824	0.450054	0.626824
QAPSAPETGGAGASEAPAPTGGEDGAGAETTPVAEPTK	sp|O15013|ARHGA_HUMAN	O15013	ARHGEF10	Rho guanine nucleotide exchange factor 10 OS=Homo sapiens OX=9606 GN=ARHGEF10 PE=1 SV=4	49.77	0.000128403	68.3907	[31] Phospho (ST)	1	GAGAETT*PVAEPT	99	sp|O15013|ARHGA_HUMAN	64.3053	163.518	3322.29	64.3053	2739.97	1.27724e+06	163.518	2739.97	1.56588	1.72636	4.06664	0.333333	0.333333	0.313749	0.509114	0.313749	0.509114
SDLSSSSGSLSLSHGSSSLEHR	sp|O15013|ARHGA_HUMAN	O15013	ARHGEF10	Rho guanine nucleotide exchange factor 10 OS=Homo sapiens OX=9606 GN=ARHGEF10 PE=1 SV=4	181.38	0	67.968	[6] Phospho (ST)	1	KSDLSSS*SGSLSL	1284	sp|O15013|ARHGA_HUMAN	2.35752e+06	2.19007e+06	2.11652e+06	2.28424e+06	1.52443e+06	5.09172e+06	2.19007e+06	2.28424e+06	0.0556015	0.633357	0.0607384	0	0.111111	0.654855	0.787796	0.654855	0.787796
SDLSSSSGSLSLSHGSSSLEHR	sp|O15013|ARHGA_HUMAN	O15013	ARHGEF10	Rho guanine nucleotide exchange factor 10 OS=Homo sapiens OX=9606 GN=ARHGEF10 PE=1 SV=4	31.68	0.000903936	71.3033	[7] Phospho (ST)|[9] Phospho (ST)	2	SDLSSSS*GSLSLS,LSSSSGS*LSLSHG	12851287	sp|O15013|ARHGA_HUMAN	144417	163320	130220	314629	81604	149010	144417	149010	0.113749	0.659774	0.0451645	0	0	0.8509	0.915961	0.8509	0.915961
SLIAQDHR	sp|O15013|ARHGA_HUMAN	O15013	ARHGEF10	Rho guanine nucleotide exchange factor 10 OS=Homo sapiens OX=9606 GN=ARHGEF10 PE=1 SV=4	43.87	0.000221877	34.0147	[1] Phospho (ST)	1	SFIRTKS*LIAQDH	379	sp|O15013|ARHGA_HUMAN	1212.32	64.3053	64.3053	3759.32	64.3053	196001	64.3053	3759.32	1.48287	1.68257	5.86939	0.666667	0.333333	0.205535	0.401697	0.205535	0.401697
TKSLIAQDHR	sp|O15013|ARHGA_HUMAN	O15013	ARHGEF10	Rho guanine nucleotide exchange factor 10 OS=Homo sapiens OX=9606 GN=ARHGEF10 PE=1 SV=4	105.15	0	28.2141	[3] Phospho (ST)	1	SFIRTKS*LIAQDH	379	sp|O15013|ARHGA_HUMAN	7909.65	20335.6	14762.2	110228	38842.2	72033.4	14762.2	72033.4	0.434152	0.48469	2.28675	0	0	0.00639339	0.0617523	0.00639339	0.0617523
YDTNNNEEEEGEQFDFDSGDEIPEADR	sp|O15013|ARHGA_HUMAN	O15013	ARHGEF10	Rho guanine nucleotide exchange factor 10 OS=Homo sapiens OX=9606 GN=ARHGEF10 PE=1 SV=4	126.05	0	89.4796	[18] Phospho (ST)	1	EQFDFDS*GDEIPE	59	sp|O15013|ARHGA_HUMAN	1.99455e+06	2.05582e+06	2.20423e+06	1.94767e+06	1.33828e+06	32639.5	2.05582e+06	1.33828e+06	0.0517121	0.884456	-0.619333	0	0	0.215864	0.414275	0.215864	0.414275
NSHELGPCPEDGSDAPLEDSTADAAASPGP	sp|O15085|ARHGB_HUMAN	O15085	ARHGEF11	Rho guanine nucleotide exchange factor 11 OS=Homo sapiens OX=9606 GN=ARHGEF11 PE=1 SV=1	61.04	0.00016909	82.3937	[27] Phospho (ST)	1	TADAAAS*PGP	1519	sp|O15085|ARHGB_HUMAN	151155	250415	250395	698782	107510	102855	250395	107510	0.263676	1.13092	-1.21974	0	0	0.909998	0.950388	0.909998	0.950388
NSVLSDPGLDSPRTSPVIMAR	sp|O15085|ARHGB_HUMAN	O15085	ARHGEF11	Rho guanine nucleotide exchange factor 11 OS=Homo sapiens OX=9606 GN=ARHGEF11 PE=1 SV=1	17.41	0.00152597	93.5316	[11] Phospho (ST)|[15] Phospho (ST)	2	SDPGLDS*PRTSPV,LDSPRTS*PVIMAR	251255	sp|O15085|ARHGB_HUMAN	416177	378020	363672	324164	247373	117022	378020	247373	0.0703119	0.456252	-0.611777	0	0	0.100299	0.262888	0.100299	0.262888
NSVLSDPGLDSPRTSPVIMAR	sp|O15085|ARHGB_HUMAN	O15085	ARHGEF11	Rho guanine nucleotide exchange factor 11 OS=Homo sapiens OX=9606 GN=ARHGEF11 PE=1 SV=1	33.96	0.000519751	88.9534	[11] Phospho (ST)|[15] Phospho (ST)|[19] Oxidation (M)	3	SDPGLDS*PRTSPV,LDSPRTS*PVIMAR,RTSPVIM*ARVAQH	251255259	sp|O15085|ARHGB_HUMAN	97988.1	96313.9	70793.3	104712	24046.3	31680.4	96313.9	31680.4	0.172473	0.832701	-1.60415	0	0	0.149554	0.332741	0.149554	0.332741
QPSDASETTGLVQR	sp|O15085|ARHGB_HUMAN	O15085	ARHGEF11	Rho guanine nucleotide exchange factor 11 OS=Homo sapiens OX=9606 GN=ARHGEF11 PE=1 SV=1	50.22	0.000129685	56.0876	[3] Phospho (ST)	1	SHHRQPS*DASETT	35	sp|O15085|ARHGB_HUMAN	33126.8	59750.3	68406.5	54533.6	24729.3	19358.5	59750.3	24729.3	0.342004	0.576422	-1.27272	0	0	0.184654	0.37703	0.184654	0.37703
RPSRSPPSLALR	sp|O15085|ARHGB_HUMAN	O15085	ARHGEF11	Rho guanine nucleotide exchange factor 11 OS=Homo sapiens OX=9606 GN=ARHGEF11 PE=1 SV=1	26.82	0.00110205	57.1758	[5] Phospho (ST)	1	PRRPSRS*PPSLAL	1413	sp|O15085|ARHGB_HUMAN	175031	201726	195703	208493	27472.4	2330.52	195703	27472.4	0.0733756	1.41599	-2.83261	0	0	0.113297	0.282417	0.113297	0.282417
SLENPTPPFTPK	sp|O15085|ARHGB_HUMAN	O15085	ARHGEF11	Rho guanine nucleotide exchange factor 11 OS=Homo sapiens OX=9606 GN=ARHGEF11 PE=1 SV=1	37.22	0.000470102	87.8422	[1] Phospho (ST)|[6] Phospho (ST)	2	SSLSTRS*LENPTP,RSLENPT*PPFTPK	663668	sp|O15085|ARHGB_HUMAN	226297	195441	217621	218367	91090.4	53765.4	217621	91090.4	0.0746673	0.712786	-1.25645	0	0	0.108265	0.275071	0.108265	0.275071
SLENPTPPFTPK	sp|O15085|ARHGB_HUMAN	O15085	ARHGEF11	Rho guanine nucleotide exchange factor 11 OS=Homo sapiens OX=9606 GN=ARHGEF11 PE=1 SV=1	33.83	0.000518448	86.682	[6] Phospho (ST)	1	RSLENPT*PPFTPK	668	sp|O15085|ARHGB_HUMAN	207714	233110	224912	365607	193846	604817	224912	365607	0.0584059	0.531851	0.700932	0	0	0.211169	0.409158	0.211169	0.409158
SLGGESSGGTTPVGSFHTEAAR	sp|O15085|ARHGB_HUMAN	O15085	ARHGEF11	Rho guanine nucleotide exchange factor 11 OS=Homo sapiens OX=9606 GN=ARHGEF11 PE=1 SV=1	36.71	0.000463779	73.0481	[10] Phospho (ST)|[11] Phospho (ST)	2	GESSGGT*TPVGSF,ESSGGTT*PVGSFH	14611462	sp|O15085|ARHGB_HUMAN	70632	135167	145571	162800	66110.1	73226.3	135167	73226.3	0.34662	0.535061	-0.884312	0	0	0.60928	0.754442	0.60928	0.754442
SLGGESSGGTTPVGSFHTEAAR	sp|O15085|ARHGB_HUMAN	O15085	ARHGEF11	Rho guanine nucleotide exchange factor 11 OS=Homo sapiens OX=9606 GN=ARHGEF11 PE=1 SV=1	160.12	0	73.6052	[7] Phospho (ST)	1	SLGGESS*GGTTPV	1458	sp|O15085|ARHGB_HUMAN	327367	338750	329530	433906	273153	425467	329530	425467	0.0182149	0.239658	0.368638	0	0	0.623944	0.765203	0.623944	0.765203
SLGGESSGGTTPVGSFHTEAAR	sp|O15085|ARHGB_HUMAN	O15085	ARHGEF11	Rho guanine nucleotide exchange factor 11 OS=Homo sapiens OX=9606 GN=ARHGEF11 PE=1 SV=1	67.41	0.000196734	73.0978	[7] Phospho (ST)|[10] Phospho (ST)	2	SLGGESS*GGTTPV,GESSGGT*TPVGSF	14581461	sp|O15085|ARHGB_HUMAN	83192.9	124744	96292.3	213320	171642	79977.7	96292.3	171642	0.209475	0.440154	0.833906	0	0	0.302591	0.499746	0.302591	0.499746
SPPSLALR	sp|O15085|ARHGB_HUMAN	O15085	ARHGEF11	Rho guanine nucleotide exchange factor 11 OS=Homo sapiens OX=9606 GN=ARHGEF11 PE=1 SV=1	35.29	0.000448189	76.3282	[1] Phospho (ST)	1	PRRPSRS*PPSLAL	1413	sp|O15085|ARHGB_HUMAN	59969.1	62602	54319.9	65688.8	8324.98	12133.4	59969.1	12133.4	0.0717658	1.11702	-2.30523	0	0	0.091827	0.250463	0.091827	0.250463
SRSDVDMDAAAEATR	sp|O15085|ARHGB_HUMAN	O15085	ARHGEF11	Rho guanine nucleotide exchange factor 11 OS=Homo sapiens OX=9606 GN=ARHGEF11 PE=1 SV=1	37.85	0.000477737	52.2086	[3] Phospho (ST)	1	NVPRSRS*DVDMDA	635	sp|O15085|ARHGB_HUMAN	58778.8	71412.2	83713.4	27674.5	3776.92	35396.1	71412.2	27674.5	0.174858	0.739809	-1.36761	0	0	0.0545575	0.188326	0.0545575	0.188326
SSSQSTFHIPLSPVEVKPGNVR	sp|O15085|ARHGB_HUMAN	O15085	ARHGEF11	Rho guanine nucleotide exchange factor 11 OS=Homo sapiens OX=9606 GN=ARHGEF11 PE=1 SV=1	43.66	0.000220824	94.922	[12] Phospho (ST)	1	TFHIPLS*PVEVKP	556	sp|O15085|ARHGB_HUMAN	1.43349e+06	1.26161e+06	1.0745e+06	556838	223995	438375	1.26161e+06	438375	0.142893	0.415128	-1.52503	0	0	0.00740454	0.0658177	0.00740454	0.0658177
TRNSGIWESPELDR	sp|O15085|ARHGB_HUMAN	O15085	ARHGEF11	Rho guanine nucleotide exchange factor 11 OS=Homo sapiens OX=9606 GN=ARHGEF11 PE=1 SV=1	44.88	0.000227531	82.7538	[4] Phospho (ST)	1	PPRTRNS*GIWESP	1295	sp|O15085|ARHGB_HUMAN	188669	270793	279749	374653	160217	254691	270793	254691	0.20373	0.408341	-0.0884413	0	0	0.939849	0.967883	0.939849	0.967883
TSPVIMAR	sp|O15085|ARHGB_HUMAN	O15085	ARHGEF11	Rho guanine nucleotide exchange factor 11 OS=Homo sapiens OX=9606 GN=ARHGEF11 PE=1 SV=1	21.25	0.00137606	58.6585	[2] Phospho (ST)	1	LDSPRTS*PVIMAR	255	sp|O15085|ARHGB_HUMAN	21451.7	21880.5	25312.4	31419.2	26202.3	31431.3	21880.5	31419.2	0.0924811	0.101585	0.522003	0	0	0.194721	0.389209	0.194721	0.389209
WTDGSLSPPAKEPLASDSR	sp|O15085|ARHGB_HUMAN	O15085	ARHGEF11	Rho guanine nucleotide exchange factor 11 OS=Homo sapiens OX=9606 GN=ARHGEF11 PE=1 SV=1	92.05	0	81.9389	[7] Phospho (ST)	1	WTDGSLS*PPAKEP	1480	sp|O15085|ARHGB_HUMAN	314944	386863	559580	682887	245699	244283	386863	245699	0.299031	0.646671	-0.654929	0	0	0.655852	0.788482	0.655852	0.788482
EAHSDENPSEGDGAVNKEEK	sp|Q9NZN5|ARHGC_HUMAN	Q9NZN5	ARHGEF12	Rho guanine nucleotide exchange factor 12 OS=Homo sapiens OX=9606 GN=ARHGEF12 PE=1 SV=1	44.27	0.00022424	23.7342	[4] Phospho (ST)	1	DAREAHS*DENPSE	1389	sp|Q9NZN5|ARHGC_HUMAN	18481.6	59378.4	12907.8	74812.9	32274.8	10122.6	18481.6	32274.8	0.838656	0.841465	0.804315	0	0	0.788657	0.877653	0.788657	0.877653
HLSTPSSVSPEPQDSAK	sp|Q9NZN5|ARHGC_HUMAN	Q9NZN5	ARHGEF12	Rho guanine nucleotide exchange factor 12 OS=Homo sapiens OX=9606 GN=ARHGEF12 PE=1 SV=1	67.59	0.000197472	49.2035	[9] Phospho (ST)	1	STPSSVS*PEPQDS	637	sp|Q9NZN5|ARHGC_HUMAN	737432	733274	507702	611756	462707	540043	733274	540043	0.199329	0.13851	-0.441278	0	0	0.380347	0.569045	0.380347	0.569045
ITSPVLMGEENNVVHNQK	sp|Q9NZN5|ARHGC_HUMAN	Q9NZN5	ARHGEF12	Rho guanine nucleotide exchange factor 12 OS=Homo sapiens OX=9606 GN=ARHGEF12 PE=1 SV=1	39.62	0.000498554	81.1065	[3] Phospho (ST)	1	NMERITS*PVLMGE	190	sp|Q9NZN5|ARHGC_HUMAN	28890.1	42600.1	33668.8	5742.83	3091.86	55708.4	33668.8	5742.83	0.198529	1.3778	-2.55158	0	0	0.158889	0.345195	0.158889	0.345195
IYLEENPEKSETIQDTDTQSLVGSPSTR	sp|Q9NZN5|ARHGC_HUMAN	Q9NZN5	ARHGEF12	Rho guanine nucleotide exchange factor 12 OS=Homo sapiens OX=9606 GN=ARHGEF12 PE=1 SV=1	52.89	0.00013816	87.8002	[24] Phospho (ST)	1	TQSLVGS*PSTRIA	341	sp|Q9NZN5|ARHGC_HUMAN	115811	186031	215998	133814	49177.8	4137.22	186031	49177.8	0.297911	1.0555	-1.91946	0	0	0.109721	0.276978	0.109721	0.276978
QVGETSAPGDTLDGTPR	sp|Q9NZN5|ARHGC_HUMAN	Q9NZN5	ARHGEF12	Rho guanine nucleotide exchange factor 12 OS=Homo sapiens OX=9606 GN=ARHGEF12 PE=1 SV=1	52.32	0.00013624	57.8055	[15] Phospho (ST)	1	GDTLDGT*PRTLNT	703	sp|Q9NZN5|ARHGC_HUMAN	129502	180313	148138	21749.2	10181.3	42857.3	148138	21749.2	0.168386	0.66462	-2.76791	0	0	0.00305477	0.0464029	0.00305477	0.0464029
RPSRHDNSAIGR	sp|Q9NZN5|ARHGC_HUMAN	Q9NZN5	ARHGEF12	Rho guanine nucleotide exchange factor 12 OS=Homo sapiens OX=9606 GN=ARHGEF12 PE=1 SV=1	34.02	0.000520562	15.7967	[3] Phospho (ST)	1	GPPRRPS*RHDNSA	608	sp|Q9NZN5|ARHGC_HUMAN	37487.6	54669.5	61197.9	1362.1	2333.17	129466	54669.5	2333.17	0.239593	1.65999	-4.55037	0	0.166667	0.176025	0.366482	0.176025	0.366482
SETIQDTDTQSLVGSPSTR	sp|Q9NZN5|ARHGC_HUMAN	Q9NZN5	ARHGEF12	Rho guanine nucleotide exchange factor 12 OS=Homo sapiens OX=9606 GN=ARHGEF12 PE=1 SV=1	46.02	0.000116509	72.8721	[15] Phospho (ST)	1	TQSLVGS*PSTRIA	341	sp|Q9NZN5|ARHGC_HUMAN	167436	129113	161248	76363.5	96132.6	76772.9	161248	76772.9	0.13482	0.135966	-1.07062	0	0	0.0196586	0.106547	0.0196586	0.106547
TASQGPQTDSVIQNSENIK	sp|Q9NZN5|ARHGC_HUMAN	Q9NZN5	ARHGEF12	Rho guanine nucleotide exchange factor 12 OS=Homo sapiens OX=9606 GN=ARHGEF12 PE=1 SV=1	93.21	0	72.7507	[3] Phospho (ST)	1	PRYRTAS*QGPQTD	1288	sp|Q9NZN5|ARHGC_HUMAN	781381	772480	637759	849998	437006	154607	772480	437006	0.110157	0.727797	-0.821844	0	0	0.21442	0.412601	0.21442	0.412601
TDCSSGDASRPSSDNADSPK	sp|Q9NZN5|ARHGC_HUMAN	Q9NZN5	ARHGEF12	Rho guanine nucleotide exchange factor 12 OS=Homo sapiens OX=9606 GN=ARHGEF12 PE=1 SV=1	63.1	0.00017838	19.1946	[18] Phospho (ST)	1	SSDNADS*PKSGPK	309	sp|Q9NZN5|ARHGC_HUMAN	265087	318361	344199	106852	78029.8	726473	318361	106852	0.130464	1.20593	-1.57505	0	0	0.430138	0.612251	0.430138	0.612251
VTEHGTPKPFR	sp|Q9NZN5|ARHGC_HUMAN	Q9NZN5	ARHGEF12	Rho guanine nucleotide exchange factor 12 OS=Homo sapiens OX=9606 GN=ARHGEF12 PE=1 SV=1	64.43	0.000184877	34.1868	[6] Phospho (ST)	1	RVTEHGT*PKPFRK	736	sp|Q9NZN5|ARHGC_HUMAN	526510	896182	722360	1.12281e+06	627156	692997	722360	692997	0.258659	0.330556	-0.0598699	0	0	0.660463	0.791809	0.660463	0.791809
AQRHSDSSLEEK	sp|Q5VV41|ARHGG_HUMAN	Q5VV41	ARHGEF16	Rho guanine nucleotide exchange factor 16 OS=Homo sapiens OX=9606 GN=ARHGEF16 PE=1 SV=1	62.15	0.000173611	24.8963	[N-term] Acetyl (Protein N-term)|[5] Phospho (ST)	2	MA*QRHSDS,MAQRHS*DSSLEE	2,6	sp|Q5VV41|ARHGG_HUMAN	2.39909e+06	2.44746e+06	2.61867e+06	1.10923e+06	3.3623e+06	3.52839e+06	2.44746e+06	3.3623e+06	0.046366	0.506747	0.458164	0.333333	0.166667	0.890178	0.939483	0.890178	0.939483
AQRHSDSSLEEK	sp|Q5VV41|ARHGG_HUMAN	Q5VV41	ARHGEF16	Rho guanine nucleotide exchange factor 16 OS=Homo sapiens OX=9606 GN=ARHGEF16 PE=1 SV=1	40.1	0.000403836	25.9029	[N-term] Acetyl (Protein N-term)|[5] Phospho (ST)|[8] Phospho (ST)	3	MA*QRHSDS,MAQRHS*DSSLEE,QRHSDSS*LEEKLL	2,6,9	sp|Q5VV41|ARHGG_HUMAN	627268	1.10362e+06	775990	528958	573567	1.43254e+06	775990	573567	0.291653	0.602701	-0.436076	0	0	0.844854	0.912458	0.844854	0.912458
GHKGSFKDDPQLYQEIQER	sp|Q5VV41|ARHGG_HUMAN	Q5VV41	ARHGEF16	Rho guanine nucleotide exchange factor 16 OS=Homo sapiens OX=9606 GN=ARHGEF16 PE=1 SV=1	109.09	0	72.2711	[5] Phospho (ST)	1	KRGHKGS*FKDDPQ	208	sp|Q5VV41|ARHGG_HUMAN	537485	402132	465258	855156	509405	776334	465258	776334	0.144627	0.253917	0.738647	0	0	0.12275	0.296149	0.12275	0.296149
GLGKPGGQGDAIQLSPK	sp|Q5VV41|ARHGG_HUMAN	Q5VV41	ARHGEF16	Rho guanine nucleotide exchange factor 16 OS=Homo sapiens OX=9606 GN=ARHGEF16 PE=1 SV=1	103.23	0	71.3884	[15] Phospho (ST)	1	GDAIQLS*PKLQAL	174	sp|Q5VV41|ARHGG_HUMAN	834324	734288	704428	1.24329e+06	558283	1.412e+06	734288	1.24329e+06	0.0897924	0.422082	0.759744	0	0	0.396085	0.583487	0.396085	0.583487
GLNTSQESDDDILDESSSPEGTQK	sp|Q5VV41|ARHGG_HUMAN	Q5VV41	ARHGEF16	Rho guanine nucleotide exchange factor 16 OS=Homo sapiens OX=9606 GN=ARHGEF16 PE=1 SV=1	110.57	0	78.77	[5] Phospho (ST)	1	ERGLNTS*QESDDD	227	sp|Q5VV41|ARHGG_HUMAN	290339	295116	280043	1.3218e+06	609139	674527	290339	674527	0.0267	0.453592	1.21614	0	0	0.00852728	0.0699284	0.00852728	0.0699284
GLNTSQESDDDILDESSSPEGTQK	sp|Q5VV41|ARHGG_HUMAN	Q5VV41	ARHGEF16	Rho guanine nucleotide exchange factor 16 OS=Homo sapiens OX=9606 GN=ARHGEF16 PE=1 SV=1	162.21	0	79.7373	[5] Phospho (ST)|[8] Phospho (ST)	2	ERGLNTS*QESDDD,LNTSQES*DDDILD	227230	sp|Q5VV41|ARHGG_HUMAN	969023	972117	913361	1.61644e+06	1.267e+06	130434	969023	1.267e+06	0.0347514	0.773394	0.386813	0	0	0.597465	0.744855	0.597465	0.744855
GLNTSQESDDDILDESSSPEGTQK	sp|Q5VV41|ARHGG_HUMAN	Q5VV41	ARHGEF16	Rho guanine nucleotide exchange factor 16 OS=Homo sapiens OX=9606 GN=ARHGEF16 PE=1 SV=1	211.46	0	77.7467	[8] Phospho (ST)	1	LNTSQES*DDDILD	230	sp|Q5VV41|ARHGG_HUMAN	955852	883340	918986	2.48415e+06	1.34056e+06	1.01705e+06	918986	1.34056e+06	0.0394369	0.477596	0.544725	0	0	0.129822	0.305353	0.129822	0.305353
GSFKDDPQLYQEIQER	sp|Q5VV41|ARHGG_HUMAN	Q5VV41	ARHGEF16	Rho guanine nucleotide exchange factor 16 OS=Homo sapiens OX=9606 GN=ARHGEF16 PE=1 SV=1	29.76	0.000943174	85.3667	[2] Phospho (ST)	1	KRGHKGS*FKDDPQ	208	sp|Q5VV41|ARHGG_HUMAN	89175.7	121963	135050	164146	67893.3	112007	121963	112007	0.204788	0.420136	-0.122857	0	0	0.858369	0.920456	0.858369	0.920456
HQSFGAAVLSR	sp|Q5VV41|ARHGG_HUMAN	Q5VV41	ARHGEF16	Rho guanine nucleotide exchange factor 16 OS=Homo sapiens OX=9606 GN=ARHGEF16 PE=1 SV=1	45.22	0.000114718	72.4965	[3] Phospho (ST)	1	TPARHQS*FGAAVL	107	sp|Q5VV41|ARHGG_HUMAN	30056.9	34944.6	28809.7	358530	148361	216603	30056.9	216603	0.103692	0.444575	2.84929	0	0	0.000492153	0.0205453	0.000492153	0.0205453
AKSFTCSEKPMAR	sp|Q96PE2|ARHGH_HUMAN	Q96PE2	ARHGEF17	Rho guanine nucleotide exchange factor 17 OS=Homo sapiens OX=9606 GN=ARHGEF17 PE=1 SV=1	24.15	0.00131697	34.8361	[3] Phospho (ST)	1	TLRRAKS*FTCSEK	546	sp|Q96PE2|ARHGH_HUMAN	64.3053	64.3053	1031.34	64.3053	64.3053	64.3053	64.3053	64.3053	1.44399	0	0	0.666667	1	0.293664	0.491953	0.293664	0.491953
AKSFTCSEKPMAR	sp|Q96PE2|ARHGH_HUMAN	Q96PE2	ARHGEF17	Rho guanine nucleotide exchange factor 17 OS=Homo sapiens OX=9606 GN=ARHGEF17 PE=1 SV=1	41.91	0.000316422	26.2737	[3] Phospho (ST)|[11] Oxidation (M)	2	TLRRAKS*FTCSEK,TCSEKPM*ARRLPR	546554	sp|Q96PE2|ARHGH_HUMAN	11545.1	8867.14	10960.2	4620.16	4782.91	1011.61	10960.2	4620.16	0.134638	0.614114	-1.24626	0.333333	0	0.0338692	0.14438	0.0338692	0.14438
LADILSPR	sp|Q96PE2|ARHGH_HUMAN	Q96PE2	ARHGEF17	Rho guanine nucleotide exchange factor 17 OS=Homo sapiens OX=9606 GN=ARHGEF17 PE=1 SV=1	50.46	0.000130497	85.5779	[6] Phospho (ST)	1	KLADILS*PRLIRR	914	sp|Q96PE2|ARHGH_HUMAN	64.3053	982.041	844.474	64.3053	64.3053	64.3053	844.474	64.3053	0.785287	0	-3.71504	0.333333	1	0.0633587	0.203495	0.0633587	0.203495
RPSADSESPGTPSPDGAAWEPPAR	sp|Q96PE2|ARHGH_HUMAN	Q96PE2	ARHGEF17	Rho guanine nucleotide exchange factor 17 OS=Homo sapiens OX=9606 GN=ARHGEF17 PE=1 SV=1	41.87	0.000315989	77.2883	[3] Phospho (ST)	1	PGSRRPS*ADSESP	142	sp|Q96PE2|ARHGH_HUMAN	90599.8	82221.8	87959.8	25458.9	3261.09	89167.5	87959.8	25458.9	0.0492757	1.13481	-1.78867	0	0	0.125899	0.299986	0.125899	0.299986
SFTCSEKPMAR	sp|Q96PE2|ARHGH_HUMAN	Q96PE2	ARHGEF17	Rho guanine nucleotide exchange factor 17 OS=Homo sapiens OX=9606 GN=ARHGEF17 PE=1 SV=1	20.7	0.00142663	43.283	[1] Phospho (ST)	1	TLRRAKS*FTCSEK	546	sp|Q96PE2|ARHGH_HUMAN	3559.56	5104.18	7082.13	13124.1	10028	1.38111e+06	5104.18	13124.1	0.336416	1.68922	1.36247	0	0	0.131835	0.308047	0.131835	0.308047
SLSDPIPQR	sp|Q96PE2|ARHGH_HUMAN	Q96PE2	ARHGEF17	Rho guanine nucleotide exchange factor 17 OS=Homo sapiens OX=9606 GN=ARHGEF17 PE=1 SV=1	31.52	0.000900606	70.0349	[3] Phospho (ST)	1	EAYRSLS*DPIPQR	735	sp|Q96PE2|ARHGH_HUMAN	195206	210187	204736	18133.8	10010.1	20338.9	204736	18133.8	0.0372851	0.336596	-3.49701	0	0	7.12e-05	0.00814044	7.12e-05	0.00814044
SLSDPSR	sp|Q96PE2|ARHGH_HUMAN	Q96PE2	ARHGEF17	Rho guanine nucleotide exchange factor 17 OS=Homo sapiens OX=9606 GN=ARHGEF17 PE=1 SV=1	24.25	0.00132018	25.6591	[3] Phospho (ST)	1	PKKKSLS*DPSRRG	829	sp|Q96PE2|ARHGH_HUMAN	17555.6	31261.4	22335.7	64.3053	64.3053	8589.54	22335.7	64.3053	0.29331	1.69372	-8.4402	0	0.666667	0.0246939	0.120348	0.0246939	0.120348
SPSFGAGEGLLR	sp|Q96PE2|ARHGH_HUMAN	Q96PE2	ARHGEF17	Rho guanine nucleotide exchange factor 17 OS=Homo sapiens OX=9606 GN=ARHGEF17 PE=1 SV=1	48.8	0.000125408	92.7107	[3] Phospho (ST)	1	GVYRSPS*FGAGEG	420	sp|Q96PE2|ARHGH_HUMAN	81979.3	90112	93968.1	31145.7	6812.01	25795.3	90112	25795.3	0.0690091	0.601736	-1.80461	0	0	0.0115047	0.0805242	0.0115047	0.0805242
SSHGSFTR	sp|Q96PE2|ARHGH_HUMAN	Q96PE2	ARHGEF17	Rho guanine nucleotide exchange factor 17 OS=Homo sapiens OX=9606 GN=ARHGEF17 PE=1 SV=1	28.02	0.00105828	19.3099	[2] Phospho (ST)	1	RALRRSS*HGSFTR	1717	sp|Q96PE2|ARHGH_HUMAN	18483.5	22047.4	19419.7	372.863	10043.1	4718.35	19419.7	4718.35	0.0924584	0.960078	-2.04117	0	0.333333	0.0584859	0.195883	0.0584859	0.195883
AETFAGYDCTNSPTK	sp|Q6ZSZ5|ARHGI_HUMAN	Q6ZSZ5	ARHGEF18	Rho guanine nucleotide exchange factor 18 OS=Homo sapiens OX=9606 GN=ARHGEF18 PE=1 SV=4	44.29	0.000224291	61.7944	[12] Phospho (ST)	1	GYDCTNS*PTKNGS	921	sp|Q6ZSZ5|ARHGI_HUMAN	44807.5	37657.6	40298.1	55366.7	35892.2	31089.1	40298.1	35892.2	0.0883501	0.315243	-0.167041	0	0	0.891148	0.939735	0.891148	0.939735
GPPNSPDLKLSDSDIPGSSEESPQVVEAPGTESDPR	sp|Q6ZSZ5|ARHGI_HUMAN	Q6ZSZ5	ARHGEF18	Rho guanine nucleotide exchange factor 18 OS=Homo sapiens OX=9606 GN=ARHGEF18 PE=1 SV=4	35.57	0.000451223	92.0533	[13] Phospho (ST)	1	DLKLSDS*DIPGSS	956	sp|Q6ZSZ5|ARHGI_HUMAN	311537	458964	322448	848043	438331	420207	322448	438331	0.225487	0.425323	0.442955	0	0	0.189798	0.383488	0.189798	0.383488
RAETFAGYDCTNSPTK	sp|Q6ZSZ5|ARHGI_HUMAN	Q6ZSZ5	ARHGEF18	Rho guanine nucleotide exchange factor 18 OS=Homo sapiens OX=9606 GN=ARHGEF18 PE=1 SV=4	31.44	0.00089906	53.943	[13] Phospho (ST)	1	GYDCTNS*PTKNGS	921	sp|Q6ZSZ5|ARHGI_HUMAN	199646	13018.3	84037.2	142067	545.573	290.617	84037.2	545.573	0.952446	1.71685	-7.26711	0	0	0.144305	0.325483	0.144305	0.325483
RSLSPILPGR	sp|Q6ZSZ5|ARHGI_HUMAN	Q6ZSZ5	ARHGEF18	Rho guanine nucleotide exchange factor 18 OS=Homo sapiens OX=9606 GN=ARHGEF18 PE=1 SV=4	19.2	0.00157729	78.4173	[4] Phospho (ST)	1	RNRRSLS*PILPGR	1291	sp|Q6ZSZ5|ARHGI_HUMAN	40322.6	47886	38770.9	23756.6	23301.5	37786	40322.6	23756.6	0.115218	0.29116	-0.763261	0	0.333333	0.101936	0.265528	0.101936	0.265528
SLSPILPGR	sp|Q6ZSZ5|ARHGI_HUMAN	Q6ZSZ5	ARHGEF18	Rho guanine nucleotide exchange factor 18 OS=Homo sapiens OX=9606 GN=ARHGEF18 PE=1 SV=4	33.53	0.000600962	89.7415	[3] Phospho (ST)	1	RNRRSLS*PILPGR	1291	sp|Q6ZSZ5|ARHGI_HUMAN	440522	414301	350784	371802	239757	350634	414301	350634	0.11482	0.22112	-0.240716	0	0	0.297374	0.495249	0.297374	0.495249
EPALPLEPDSGGNTSPGVTANGEAR	sp|Q92974|ARHG2_HUMAN	Q92974	ARHGEF2	Rho guanine nucleotide exchange factor 2 OS=Homo sapiens OX=9606 GN=ARHGEF2 PE=1 SV=4	43.51	0.000219853	89.9296	[15] Phospho (ST)	1	DSGGNTS*PGVTAN	696	sp|Q92974|ARHG2_HUMAN	891430	698999	605982	1.59791e+06	1.03664e+06	1.20948e+06	698999	1.20948e+06	0.198844	0.224338	0.791023	0	0	0.045281	0.169711	0.045281	0.169711
ERPSSAIYPSDSFR	sp|Q92974|ARHG2_HUMAN	Q92974	ARHGEF2	Rho guanine nucleotide exchange factor 2 OS=Homo sapiens OX=9606 GN=ARHGEF2 PE=1 SV=4	37.66	0.000475376	76.7664	[5] Phospho (ST)	1	IRERPSS*AIYPSD	122	sp|Q92974|ARHG2_HUMAN	93290.8	99235	74286.2	39048.3	28617.4	18164.1	93290.8	28617.4	0.146527	0.364981	-1.70484	0	0	0.00472921	0.0547669	0.00472921	0.0547669
ERQELGSPEER	sp|Q92974|ARHG2_HUMAN	Q92974	ARHGEF2	Rho guanine nucleotide exchange factor 2 OS=Homo sapiens OX=9606 GN=ARHGEF2 PE=1 SV=4	38.8	0.000488424	28.8123	[7] Phospho (ST)	1	ERQELGS*PEERLQ	932	sp|Q92974|ARHG2_HUMAN	1.00623e+06	1.20766e+06	1.19496e+06	1.37953e+06	1.23141e+06	1.8173e+06	1.19496e+06	1.37953e+06	0.0992784	0.20639	0.207217	0	0	0.250628	0.452286	0.250628	0.452286
ILSQSTDSLNMR	sp|Q92974|ARHG2_HUMAN	Q92974	ARHGEF2	Rho guanine nucleotide exchange factor 2 OS=Homo sapiens OX=9606 GN=ARHGEF2 PE=1 SV=4	77.35	0.000254712	76.9865	[5] Phospho (ST)	1	RRILSQS*TDSLNM	174	sp|Q92974|ARHG2_HUMAN	1.4015e+06	1.23634e+06	1.25058e+06	1.50036e+06	667266	1.22824e+06	1.25058e+06	1.22824e+06	0.0706126	0.375288	-0.026008	0	0	0.504056	0.672281	0.504056	0.672281
ILSQSTDSLNMR	sp|Q92974|ARHG2_HUMAN	Q92974	ARHGEF2	Rho guanine nucleotide exchange factor 2 OS=Homo sapiens OX=9606 GN=ARHGEF2 PE=1 SV=4	60.2	0.000165453	59.7379	[5] Phospho (ST)|[11] Oxidation (M)	2	RRILSQS*TDSLNM,STDSLNM*RNRTLS	174180	sp|Q92974|ARHG2_HUMAN	1.36253e+06	724523	770067	1.00319e+06	704409	694937	770067	704409	0.373735	0.218895	-0.128572	0	0	0.591855	0.740912	0.591855	0.740912
QELGSPEER	sp|Q92974|ARHG2_HUMAN	Q92974	ARHGEF2	Rho guanine nucleotide exchange factor 2 OS=Homo sapiens OX=9606 GN=ARHGEF2 PE=1 SV=4	56.88	0.000152602	31.5472	[5] Phospho (ST)	1	ERQELGS*PEERLQ	932	sp|Q92974|ARHG2_HUMAN	2.19368e+06	2.877e+06	1.73641e+06	1.94052e+06	1.7293e+06	1.29924e+06	2.19368e+06	1.7293e+06	0.252979	0.197304	-0.343162	0	0	0.229183	0.4288	0.229183	0.4288
SLPAGDALYLSFNPPQPSR	sp|Q92974|ARHG2_HUMAN	Q92974	ARHGEF2	Rho guanine nucleotide exchange factor 2 OS=Homo sapiens OX=9606 GN=ARHGEF2 PE=1 SV=4	188.8	0	99.3085	[1] Phospho (ST)	1	VDPRRRS*LPAGDA	886	sp|Q92974|ARHG2_HUMAN	1.11137e+06	1.24432e+06	1.17929e+06	438987	196711	90084.4	1.17929e+06	196711	0.0564188	0.739032	-2.58376	0	0	0.00634142	0.0617523	0.00634142	0.0617523
SVSTTNIAGHFNDESPLGLR	sp|Q92974|ARHG2_HUMAN	Q92974	ARHGEF2	Rho guanine nucleotide exchange factor 2 OS=Homo sapiens OX=9606 GN=ARHGEF2 PE=1 SV=4	97.76	0	91.4891	[15] Phospho (ST)	1	GHFNDES*PLGLRR	163	sp|Q92974|ARHG2_HUMAN	553633	388792	432806	299128	424495	270017	432806	299128	0.18619	0.247832	-0.53296	0	0	0.181405	0.373009	0.181405	0.373009
ALDIDSDEESEPK	sp|Q96DR7|ARHGQ_HUMAN	Q96DR7	ARHGEF26	Rho guanine nucleotide exchange factor 26 OS=Homo sapiens OX=9606 GN=ARHGEF26 PE=1 SV=4	41.69	0.000314597	60.4412	[6] Phospho (ST)	1	KALDIDS*DEESEP	392	sp|Q96DR7|ARHGQ_HUMAN	450734	346206	296225	630425	320494	23701.2	346206	320494	0.21637	0.933858	-0.111336	0	0	0.419126	0.603453	0.419126	0.603453
TVHRSPLLLGAQR	sp|Q96DR7|ARHGQ_HUMAN	Q96DR7	ARHGEF26	Rho guanine nucleotide exchange factor 26 OS=Homo sapiens OX=9606 GN=ARHGEF26 PE=1 SV=4	40.13	0.000404	60.9993	[5] Phospho (ST)	1	SRTVHRS*PLLLGA	80	sp|Q96DR7|ARHGQ_HUMAN	65576.5	95149	97949.2	43839.2	40847.5	278608	95149	43839.2	0.208023	1.12649	-1.11797	0	0	0.909066	0.950021	0.909066	0.950021
AESLPLSSNLQSK	sp|Q8N1W1|ARG28_HUMAN	Q8N1W1	ARHGEF28	Rho guanine nucleotide exchange factor 28 OS=Homo sapiens OX=9606 GN=ARHGEF28 PE=1 SV=3	34.77	0.000530598	82.6827	[3] Phospho (ST)	1	NISRAES*LPLSSN	535	sp|Q8N1W1|ARG28_HUMAN	68040.2	98308.7	111478	215210	111483	228711	98308.7	215210	0.240502	0.346454	1.13036	0	0	0.059838	0.198025	0.059838	0.198025
[truncated: 17,352 more rows]

## Sheet: Source Data_Phospho_SKOV3
peptide	proteinName	ac	geneName	proteinDescription	idScore	idQValue	retentionTime	ptm	nbPtmsPerPeptide	motifX	modifCoord	allAccessions	010_POset_D19	011_POset_D19	012_POset_D19	007_POset_D19	008_POset_D19	009_POset_D19	medianInt_Condition4	medianInt_Condition3	cv_Condition4	cv_Condition3	log2ratio_Condition3	fracNAFeatures.Condition4	fracNAFeatures.Condition3	pValue_Condition3	qValue_Condition3	FTestPValue	FTestQValue
[truncated: 18,514 more rows]

[truncated: 1 more sheets: Source Data_Phospho_OVCAR3]
