# Supplementary material for: Collagen-rich omentum is a premetastatic niche for integrin α2-mediated peritoneal metastasis
Source: eLife. 2020 Oct 7;9:e59442. doi: 10.7554/eLife.59442 (PMC7541088; doi:10.7554/eLife.59442)
Supplement: Supplementary file 1. — (a) Selected differentially expressed cellular adhesion and ECM-related proteins in omentum metastasis (T) vs normal omentum (O). (b) 69 significantly downregulated phosphoproteins shared among three ΔITGA2 EOC cell lines. (c) Selected significantly down and upregulated phosphopeptides in comparison between ΔITGA2 and WT IGROV1 cells. (d) Clinical and pathological information of patient samples used in this study (e) Clinical and pathological information of patient samples in tissue microarray (TMA). [file elife-59442-supp1.xlsx]

## Sheet: Supplementary file 1a
Supplementary file 1a. Selected differentially expressed cellular adhesion and ECM-related proteins in omentum metastasis (T) vs normal omentum (O) (FDR < 1%)
UniProtKB	Gene		Moleclar mass	Normalized total specturms (EOC OM; N=4)	Normalized total specturms (Normal OM, N=4)	T8	T11	T13	T15	O7	O8	O9	O17
sp|P62736	ACTA	Actin, aortic smooth muscle OS=Homo sapiens OX=9606 GN=ACTA2 PE=1 SV=1	42 kDa	148.75	110.5	151	137	200	107	128	95	54	165
sp|P60709	ACTB	Actin, cytoplasmic 1 OS=Homo sapiens OX=9606 GN=ACTB PE=1 SV=1	42 kDa	212.25	139.75	242	174	312	121	188	104	69	198
sp|Q03135	CAV1	Caveolin-1 OS=Homo sapiens OX=9606 GN=CAV1 PE=1 SV=4	20 kDa	13.75	19.25	8	16	9	22	23	23	10	21
sp|P12830	CDH1	Cadherin-1 OS=Homo sapiens OX=9606 GN=CDH1 PE=1 SV=3	97 kDa	1.75	0	2	0	5	0	0	0	0	0
sp|P55287	CDH11	Cadherin-11 OS=Homo sapiens OX=9606 GN=CDH11 PE=1 SV=2	88 kDa	3	0.25	3	0	9	0	1	0	0	0
sp|P55290	CDH13	Cadherin-13 OS=Homo sapiens OX=9606 GN=CDH13 PE=1 SV=1	78 kDa	1.25	2.75	1	2	0	2	6	2	1	2
sp|P22223	CDH3	Cadherin-3 OS=Homo sapiens OX=9606 GN=CDH3 PE=1 SV=2	91 kDa	0.5	0	0	0	2	0	0	0	0	0
sp|P33151	CDH5	Cadherin-5 OS=Homo sapiens OX=9606 GN=CDH5 PE=1 SV=5	88 kDa	1.75	3	1	4	1	1	6	1	3	2
sp|P55285	CDH6	Cadherin-6 OS=Homo sapiens OX=9606 GN=CDH6 PE=1 SV=1	88 kDa	1	0	3	0	1	0	0	0	0	0
sp|P12107	COL11A1	Collagen alpha-1(XI) chain OS=Homo sapiens OX=9606 GN=COL11A1 PE=1 SV=4	181 kDa	4	0.5	0	0	15	1	0	0	1	1
sp|Q99715	COL12A1	Collagen alpha-1(XII) chain OS=Homo sapiens OX=9606 GN=COL12A1 PE=1 SV=2	333 kDa	42.25	6.25	55	3	107	4	9	1	0	15
sp|Q05707	COL14A1	Collagen alpha-1(XIV) chain OS=Homo sapiens OX=9606 GN=COL14A1 PE=1 SV=3	194 kDa	44.5	44.75	56	65	25	32	61	35	9	74
sp|P39059	COL15A1	Collagen alpha-1(XV) chain OS=Homo sapiens OX=9606 GN=COL15A1 PE=1 SV=2	142 kDa	3.25	6.25	0	3	1	9	6	3	1	15
sp|P39060	COL18A1	Collagen alpha-1(XVIII) chain OS=Homo sapiens OX=9606 GN=COL18A1 PE=1 SV=5	178 kDa	11	10.25	10	7	13	14	10	9	6	16
sp|P02452	COL1A1	Collagen alpha-1(I) chain OS=Homo sapiens OX=9606 GN=COL1A1 PE=1 SV=5	139 kDa	19.5	6	21	4	40	13	5	2	4	13
sp|P08123	COL1A2	Collagen alpha-2(I) chain OS=Homo sapiens OX=9606 GN=COL1A2 PE=1 SV=7	129 kDa	13.25	5.75	13	3	24	13	5	2	7	9
sp|P02461	COL3A1	Collagen alpha-1(III) chain OS=Homo sapiens OX=9606 GN=COL3A1 PE=1 SV=4	139 kDa	5.5	0.25	4	0	13	5	0	1	0	0
sp|P02462	COL4A1	Collagen alpha-1(IV) chain OS=Homo sapiens OX=9606 GN=COL4A1 PE=1 SV=4	161 kDa	1.75	1.25	0	0	2	5	2	1	0	2
sp|P08572	COL4A2	Collagen alpha-2(IV) chain OS=Homo sapiens OX=9606 GN=COL4A2 PE=1 SV=4	168 kDa	4.75	2	0	0	6	13	3	0	0	5
sp|P20908	COL5A1	Collagen alpha-1(V) chain OS=Homo sapiens OX=9606 GN=COL5A1 PE=1 SV=3	184 kDa	6	0.5	4	0	14	6	0	0	0	2
sp|P05997	COL5A2	Collagen alpha-2(V) chain OS=Homo sapiens OX=9606 GN=COL5A2 PE=1 SV=3	145 kDa	3.5	0.25	4	0	9	1	0	0	0	1
sp|P12109	COL6A1	Collagen alpha-1(VI) chain OS=Homo sapiens OX=9606 GN=COL6A1 PE=1 SV=3	109 kDa	21.5	17	16	17	19	34	20	19	5	24
sp|P12110	COL6A2	Collagen alpha-2(VI) chain OS=Homo sapiens OX=9606 GN=COL6A2 PE=1 SV=4	109 kDa	12	10.25	8	5	12	23	13	6	2	20
sp|P12111	COL6A3	Collagen alpha-3(VI) chain OS=Homo sapiens OX=9606 GN=COL6A3 PE=1 SV=5	344 kDa	59	47	49	41	70	76	60	37	13	78
sp|P35222	CTNNB1	Catenin beta-1 OS=Homo sapiens OX=9606 GN=CTNNB1 PE=1 SV=1	85 kDa	13.25	5.5	22	3	28	0	14	2	0	6
sp|O60716	CTNND1	Catenin delta-1 OS=Homo sapiens OX=9606 GN=CTNND1 PE=1 SV=1	108 kDa	14.5	5.5	17	10	30	1	16	2	0	4
sp|P07585	DCN	Decorin OS=Homo sapiens OX=9606 GN=DCN PE=1 SV=1	40 kDa	14.75	20.5	14	16	14	15	22	15	14	31
sp|P16422	EPCAM	Epithelial cell adhesion molecule OS=Homo sapiens OX=9606 GN=EPCAM PE=1 SV=2	35 kDa	5	0	14	0	6	0	0	0	0	0
sp|P15090	FABP4	Fatty acid-binding protein, adipocyte OS=Homo sapiens OX=9606 GN=FABP4 PE=1 SV=3	15 kDa	117.25	218.25	11	243	13	202	365	192	112	204
sp|Q01469	FABP5	Fatty acid-binding protein 5 OS=Homo sapiens OX=9606 GN=FABP5 PE=1 SV=3	15 kDa	22.5	37.5	14	41	16	19	91	18	12	29
sp|Q12884	FAP	Prolyl endopeptidase FAP OS=Homo sapiens OX=9606 GN=FAP PE=1 SV=5	88 kDa	8.25	0.5	9	0	22	2	2	0	0	0
sp|P49327	FASN	Fatty acid synthase OS=Homo sapiens OX=9606 GN=FASN PE=1 SV=3	273 kDa	65	143.5	49	121	18	72	343	60	22	149
sp|P23142	FBLN1	Fibulin-1 OS=Homo sapiens OX=9606 GN=FBLN1 PE=1 SV=4	77 kDa	23	9.75	32	17	36	7	20	5	5	9
sp|P98095	FBLN2	Fibulin-2 OS=Homo sapiens OX=9606 GN=FBLN2 PE=1 SV=2	127 kDa	7.5	2.5	10	3	17	0	7	2	0	1
sp|Q9UBX5	FBLN5	Fibulin-5 OS=Homo sapiens OX=9606 GN=FBLN5 PE=1 SV=1	50 kDa	3	2.75	4	3	4	1	7	1	0	3
sp|P35555	FBN1	Fibrillin-1 OS=Homo sapiens OX=9606 GN=FBN1 PE=1 SV=3	312 kDa	33.25	9.25	19	12	55	47	20	7	1	9
sp|P02671	FGA	Fibrinogen alpha chain OS=Homo sapiens OX=9606 GN=FGA PE=1 SV=2	95 kDa	51.75	59.5	38	55	53	61	56	51	67	64
sp|P02675	FGB	Fibrinogen beta chain OS=Homo sapiens OX=9606 GN=FGB PE=1 SV=2	56 kDa	48.5	43.25	33	53	45	63	56	27	36	54
sp|P02679	FGG	Fibrinogen gamma chain OS=Homo sapiens OX=9606 GN=FGG PE=1 SV=3	52 kDa	34.5	32.5	26	40	33	39	41	22	27	40
sp|P02751	FN1	Fibronectin OS=Homo sapiens OX=9606 GN=FN1 PE=1 SV=4	263 kDa	55.75	16.5	57	29	92	45	12	7	5	42
sp|P56199	ITGA1	Integrin alpha-1 OS=Homo sapiens OX=9606 GN=ITGA1 PE=1 SV=2	131 kDa	5.25	8	3	8	5	5	17	10	2	3
sp|Q9UKX5	ITGA11	Integrin alpha-11 OS=Homo sapiens OX=9606 GN=ITGA11 PE=1 SV=2	133 kDa	1	0	2	0	2	0	0	0	0	0
sp|P17301	ITGA2	Integrin alpha-2 OS=Homo sapiens OX=9606 GN=ITGA2 PE=1 SV=1	129 kDa	4.75	0	3	5	11	0	0	0	0	0
sp|P08514	ITGA2B	Integrin alpha-IIb OS=Homo sapiens OX=9606 GN=ITGA2B PE=1 SV=3	113 kDa	3	0.5	1	8	2	1	0	1	1	0
sp|P26006	ITGA3	Integrin alpha-3 OS=Homo sapiens OX=9606 GN=ITGA3 PE=1 SV=5	117 kDa	3.5	1.25	6	3	5	0	4	0	0	1
sp|P13612	ITGA4	Integrin alpha-4 OS=Homo sapiens OX=9606 GN=ITGA4 PE=1 SV=3	115 kDa	0.5	0	0	0	2	0	0	0	0	0
sp|P08648	ITGA5	Integrin alpha-5 OS=Homo sapiens OX=9606 GN=ITGA5 PE=1 SV=2	115 kDa	3.25	1.75	2	2	9	0	3	1	1	2
sp|P23229	ITGA6	Integrin alpha-6 OS=Homo sapiens OX=9606 GN=ITGA6 PE=1 SV=5	127 kDa	5.75	6.25	7	9	1	6	15	4	1	5
sp|Q13683	ITGA7	Integrin alpha-7 OS=Homo sapiens OX=9606 GN=ITGA7 PE=1 SV=3	129 kDa	8	14	1	19	0	12	31	10	4	11
sp|P20701	ITGAL	Integrin alpha-L OS=Homo sapiens OX=9606 GN=ITGAL PE=1 SV=3	129 kDa	0.5	0	0	0	2	0	0	0	0	0
sp|P11215	ITGAM	Integrin alpha-M OS=Homo sapiens OX=9606 GN=ITGAM PE=1 SV=2	127 kDa	9	0.5	6	7	23	0	2	0	0	0
sp|P0675	ITGAV	Integrin alpha-V OS=Homo sapiens OX=9606 GN=ITGAV PE=1 SV=2	116 kDa	12.75	3	24	3	21	3	6	2	1	3
sp|P20702	ITGAX	Integrin alpha-X OS=Homo sapiens OX=9606 GN=ITGAX PE=1 SV=3	128 kDa	2.25	0.75	2	0	7	0	0	0	1	2
sp|P05556	ITGB1	Integrin beta-1 OS=Homo sapiens OX=9606 GN=ITGB1 PE=1 SV=2	88 kDa	24.75	21.75	24	30	28	17	40	21	10	16
sp|P05107	ITGB2	Integrin beta-2 OS=Homo sapiens OX=9606 GN=ITGB2 PE=1 SV=2	85 kDa	13.75	1.5	14	15	26	0	3	0	1	2
sp|P05106	ITGB3	Integrin beta-3 OS=Homo sapiens OX=9606 GN=ITGB3 PE=1 SV=2	87 kDa	3	0.5	2	7	2	1	0	1	1	0
sp|P16144	ITGB4	Integrin beta-4 OS=Homo sapiens OX=9606 GN=ITGB4 PE=1 SV=5	202 kDa	1.75	1.25	5	0	2	0	4	1	0	0
sp|P18084	ITGB5	Integrin beta-5 OS=Homo sapiens OX=9606 GN=ITGB5 PE=1 SV=1	88 kDa	5	0	9	0	11	0	0	0	0	0
sp|P18564	ITGB6	Integrin beta-6 OS=Homo sapiens OX=9606 GN=ITGB6 PE=1 SV=2	86 kDa	1	0	4	0	0	0	0	0	0	0
sp|Q16363	LAMA4	Laminin subunit alpha-4 OS=Homo sapiens OX=9606 GN=LAMA4 PE=1 SV=4	203 kDa	20	31.5	2	12	13	53	42	28	9	47
sp|O15230	LAMA5	Laminin subunit alpha-5 OS=Homo sapiens OX=9606 GN=LAMA5 PE=1 SV=8	400 kDa	7	1.25	4	0	18	6	1	0	0	4
sp|P07942	LAMB1	Laminin subunit beta-1 OS=Homo sapiens OX=9606 GN=LAMB1 PE=1 SV=2	198 kDa	15.5	31.75	4	8	23	27	61	21	3	42
sp|P55268	LAMB2	Laminin subunit beta-2 OS=Homo sapiens OX=9606 GN=LAMB2 PE=1 SV=2	196 kDa	17.75	22	4	4	17	46	33	17	4	34
sp|P11047	LAMC1	Laminin subunit gamma-1 OS=Homo sapiens OX=9606 GN=LAMC1 PE=1 SV=3	178 kDa	29	41	12	23	27	54	57	44	16	47
sp|O60568	LOD3	Multifunctional procollagen lysine hydroxylase and glycosyltransferase LH3 OS=Homo sapiens OX=9606 GN=PLOD3 PE=1 SV=1	85 kDa	3.75	0	6	2	7	0	0	0	0	0
sp|P51884	LUM	Lumican OS=Homo sapiens OX=9606 GN=LUM PE=1 SV=2	38 kDa	29.5	34.5	29	29	29	31	35	32	21	50
sp|P50281	MMP14	Matrix metalloproteinase-14 OS=Homo sapiens OX=9606 GN=MMP14 PE=1 SV=3	66 kDa	2	0.5	3	0	5	0	1	1	0	0
sp|P08253	MMP2	72 kDa type IV collagenase OS=Homo sapiens OX=9606 GN=MMP2 PE=1 SV=2	74 kDa	3.75	0	5	0	10	0	0	0	0	0
sp|P22894	MMP8	Neutrophil collagenase OS=Homo sapiens OX=9606 GN=MMP8 PE=1 SV=1	53 kDa	1	0	0	3	1	0	0	0	0	0
sp|P14780	MMP9	Matrix metalloproteinase-9 OS=Homo sapiens OX=9606 GN=MMP9 PE=1 SV=3	78 kDa	3.25	0	0	8	4	1	0	0	0	0
sp|Q13421	MSLN	Mesothelin OS=Homo sapiens OX=9606 GN=MSLN PE=1 SV=2	69 kDa	3.25	1	6	1	5	1	0	1	2	1
sp|P15941	MUC1	Mucin-1 OS=Homo sapiens OX=9606 GN=MUC1 PE=1 SV=3	122 kDa	1.25	0	5	0	0	0	0	0	0	0
sp|Q8WXI7	MUC16	Mucin-16 OS=Homo sapiens OX=9606 GN=MUC16 PE=1 SV=3	1519 kDa	4.25	0	3	0	14	0	0	0	0	0
sp|P13591	NCAM1	Neural cell adhesion molecule 1 OS=Homo sapiens OX=9606 GN=NCAM1 PE=1 SV=3	95 kDa	1.25	0.25	0	1	4	0	1	0	0	0
sp|Q08174	PCDH1	Protocadherin-1 OS=Homo sapiens OX=9606 GN=PCDH1 PE=1 SV=2	115 kDa	0	1	0	0	0	0	4	0	0	0
sp|Q15113	PCOC1	Procollagen C-endopeptidase enhancer 1 OS=Homo sapiens OX=9606 GN=PCOLCE PE=1 SV=2	48 kDa	6.5	1.75	11	1	14	0	3	0	0	4
sp|Q02809	PLOD1	Procollagen-lysine,2-oxoglutarate 5-dioxygenase 1 OS=Homo sapiens OX=9606 GN=PLOD1 PE=1 SV=2	84 kDa	8.75	0	10	1	24	0	0	0	0	0
sp|O00469	PLOD2	Procollagen-lysine,2-oxoglutarate 5-dioxygenase 2 OS=Homo sapiens OX=9606 GN=PLOD2 PE=1 SV=2	85 kDa	5.75	0.25	3	0	20	0	1	0	0	0
sp|Q05397	PTK2	Focal adhesion kinase 1 OS=Homo sapiens OX=9606 GN=PTK2 PE=1 SV=2	119 kDa	3.25	0.5	8	2	3	0	2	0	0	0
sp|P07996	THBS1	Thrombospondin-1 OS=Homo sapiens OX=9606 GN=THBS1 PE=1 SV=2	129 kDa	34	6.5	42	20	69	5	3	8	13	2
sp|P35442	THBS2	Thrombospondin-2 OS=Homo sapiens OX=9606 GN=THBS2 PE=1 SV=2	130 kDa	17.75	0.25	25	0	46	0	1	0	0	0
sp|Q9Y490	TLN	Talin-1 OS=Homo sapiens OX=9606 GN=TLN1 PE=1 SV=3	270 kDa	130	99.75	140	138	149	93	156	77	45	121
sp|Q9Y4G6	TLN2	Talin-2 OS=Homo sapiens OX=9606 GN=TLN2 PE=1 SV=4	272 kDa	37.5	48.25	16	47	26	61	98	36	11	48
sp|P24821	TNC	Tenascin OS=Homo sapiens OX=9606 GN=TNC PE=1 SV=3	241 kDa	3	0.25	3	0	9	0	0	0	0	1
sp|P22105	TNXB	Tenascin-X OS=Homo sapiens OX=9606 GN=TNXB PE=1 SV=5	458 kDa	12.75	18	0	15	0	36	16	5	1	50
sp|Q12888	TP53BP	TP53-binding protein 1 OS=Homo sapiens OX=9606 GN=TP53BP1 PE=1 SV=2	214 kDa	6.75	0.25	13	3	11	0	0	0	0	1
sp|Q71U36	TUB	Tubulin alpha-1A chain OS=Homo sapiens OX=9606 GN=TUBA1A PE=1 SV=1	50 kDa	49.25	32.5	59	46	63	29	48	31	20	31
sp|P13611	VCAN	Versican core protein OS=Homo sapiens OX=9606 GN=VCAN PE=1 SV=3	373 kDa	17.5	0.5	32	1	37	0	2	0	0	0
sp|P18206	VCL	Vinculin OS=Homo sapiens OX=9606 GN=VCL PE=1 SV=4	124 kDa	77.25	63	71	77	97	64	92	59	35	66
sp|P08670	VIM	Vimentin OS=Homo sapiens OX=9606 GN=VIM PE=1 SV=4	54 kDa	145.75	196.5	83	161	116	223	239	146	135	266
sp|P04004	VTN	Vitronectin OS=Homo sapiens OX=9606 GN=VTN PE=1 SV=1	54 kDa	14	9.25	9	12	25	10	11	9	10	7

## Sheet: Supplementary file 1b
	Supplementary file 1b. 69 significantly down-regulated phosphoproteins shared across all three ∆ITGA2 cell lines (SKOV3, OVCAR3, IGROV1)
	1	AHCTF1
	2	AHNAK
	3	AKAP11
	4	ANK2
	5	ARHGAP12
	6	ARHGAP17
	7	ARHGEF11
	8	CCDC88A
	9	CDK16
	10	CEP131
	11	CEP170
	12	CHAMP1
	13	COBLL1
	14	CRTC3
	15	DENND4C
	16	DLC1
	17	DOCK1
	18	DOCK7
	19	EEF2K
	20	ELF1
	21	ERCC5
	22	FAM193A
	23	FGD1
	24	FKBP15
	25	GATAD2B
	26	GBF1
	27	HERC1
	28	IRF2BP2
	29	KIAA1522
	30	KMT2A
	31	LARP1
	32	LMO7
	33	MAP1A
	34	MAP1S
	35	MAP4
	36	MAPK3
	37	MARK4
	38	METTL3
	39	MICALL1
	40	MYO18A
	41	NDRG2
	42	NHS
	43	NUP153
	44	PDHA1
	45	PDZD8
	46	PHLDB1
	47	POGZ
	48	PRKD1
	49	PRR12
	50	RAPGEF2
	51	RB1
	52	RBM33
	53	RPRD2
	54	SEC16A
	55	SRCAP
	56	SRGAP1
	57	STAU2
	58	STK10
	59	SUPT6H
	60	TBC1D9B
	61	TMPO
	62	TNS3
	63	TP53BP1
	64	WAC
	65	WDFY3
	66	WNK1
	67	ZEB1
	68	ZFYVE16
	69	ZNF318

## Sheet: Supplementary file 1c
Supplementary file 1c. Selected significantly down- and up-regulated phosphopeptides in comparison between ΔITGA2 and WT cells.
Identified down-regulated phosphopeptides in ΔITGA2 cells
peptide	geneName	proteinDescription	idScore	idQValue	ptm	log2ratio_KO / WT	pValue_Condition1	Phosphosites
AAATPESQEPQAK	MARCKSL1	MARCKS-related protein OS=Homo sapiens OX=9606 GN=MARCKSL1 PE=1 SV=2	0.000133976	25.0054	[4] Phospho (ST)	-14.0722	6.67254e-07	T148
VMSSSNPDLAGTHSAADEEVK	DOCK8	Dedicator of cytokinesis protein 8 OS=Homo sapiens OX=9606 GN=DOCK8 PE=1 SV=3	0.00045438	51.6639	[2] Oxidation (M)|[4] Phospho (ST)	-12.3354	2.03389e-07	S903
HQQVPHILQGLLSPR	SIK3	Serine/threonine-protein kinase SIK3 OS=Homo sapiens OX=9606 GN=SIK3 PE=1 SV=4	0.00183537	96.1219	[13] Phospho (ST)	-10.3077	1.67051e-06	S974
YGSIVDDER	IQGAP2	Ras GTPase-activating-like protein IQGAP2 OS=Homo sapiens OX=9606 GN=IQGAP2 PE=1 SV=4	0.000132661	54.2584	[3] Phospho (ST)	-9.8391	2.7031e-07	S16
YMEDSTYYK	PTK2	Focal adhesion kinase 1 OS=Homo sapiens OX=9606 GN=PTK2 PE=1 SV=2 FAK Y577	19.83	0.00147417	[8] Phospho (Y)	-9.70385	1.15561e-06	Y577
VPPPKPATPDFR	MYLK	Myosin light chain kinase, smooth muscle OS=Homo sapiens OX=9606 GN=MYLK PE=1 SV=4	0.00156838	63.5837	[8] Phospho (ST)	-9.17258	5.34472e-07	T978
LKTSLGK	MKI67	Proliferation marker protein Ki-67 OS=Homo sapiens OX=9606 GN=MKI67 PE=1 SV=2	0.00130935	31.2201	[4] Phospho (ST)	-8.63134	1.04532e-05	S1636
SLSDPSR	ARHGEF17	Rho guanine nucleotide exchange factor 17 OS=Homo sapiens OX=9606 GN=ARHGEF17 PE=1 SV=1	0.00132423	25.6591	[3] Phospho (ST)	-8.40613	3.95228e-06	S735
ALVSSESYLQR	ARHGEF5	Rho guanine nucleotide exchange factor 5 OS=Homo sapiens OX=9606 GN=ARHGEF5 PE=1 SV=3	0.00103981	81.445	[4] Phospho (ST)	-7.00944	2.02532e-05	S1136
GTPQDLAR	TLN1	Talin-1 OS=Homo sapiens OX=9606 GN=TLN1 PE=1 SV=3	34.58	0.000529054	[2] Phospho (ST)	-6.87809	0.00573564	T1263
EKRNSKHQEIFEK	DOCK1	Dedicator of cytokinesis protein 1 OS=Homo sapiens OX=9606 GN=DOCK1 PE=1 SV=2	12.14	0.0018505	[5] Phospho (ST)	-6.69533	0.0133108	S1704
TLSPGKNGVVK	ERBB2	Receptor tyrosine-protein kinase erbB-2 OS=Homo sapiens ERBB2 S1174	0.0011075	42.8764	[3] Phospho (ST)	-6.44099	4.4182e-05	S1174
SVIEPLPVTPTR	PAK1	Serine/threonine-protein kinase PAK 1 OS=Homo sapiens OX=9606 GN=PAK1 PE=1 SV=2	28.47	0.00107214	[9] Phospho (ST)	-6.33835	0.027503	T212
RSLSVEHLETK	PTPN3	Tyrosine-protein phosphatase non-receptor type 3 OS=Homo sapiens OX=9606 GN=PTPN3 PE=1 SV=2	0.00149545	53.6727	[2] Phospho (ST)	-6.32815	0.000111206	S357
IADPEHDHTGFLTEYVATR	MAPK3	Mitogen-activated protein kinase 3 OS=Homo sapiens OX=9606 GN=MAPK3 PE=1 SV=4			[15] Phospho (Y)	-5.73189	3.99596e-06	Y204
TPDVFSSSPLHLQPPPLGK	SOS1	Son of sevenless homolog 1 OS=Homo sapiens OX=9606 GN=SOS1 PE=1 SV=1	20.64	0.00149457	[6] Phospho (ST)	-5.48775	0.00929395	S1227
LIEDNEYTAR	SRC	Proto-oncogene tyrosine-protein kinase Src OS=Homo sapiens Src Y419	42.26	0.000320376	[7] Phospho (Y)	-5.11552	2.19651e-05	Y419
VADPDHDHTGFLTEYVATR	MAPK1	Mitogen-activated protein kinase 1 OS=Homo sapiens OX=9606 GN=MAPK1 PE=1 SV=3			[15] Phospho (Y)	-4.98459	1.87442e-05	Y187
VADPDHDHTGFLTEYVATR	MAPK1	Mitogen-activated protein kinase 1 OS=Homo sapiens OX=9606 GN=MAPK1 PE=1 SV=3			[13] Phospho (ST)|[15] Phospho (Y)	-4.41127	0.000710763	T185/Y187
FAGHSEAGGGSGDR	PAK4	Serine/threonine-protein kinase PAK 4 OS=Homo sapiens OX=9606 GN=PAK4 PE=1 SV=1	83.99	0.000301296	[11] Phospho (ST)	-4.42258	0.00114681	S148
IPESETESTASAPNSPR	SOS1	Son of sevenless homolog 1 OS=Homo sapiens OX=9606 GN=SOS1 PE=1 SV=1	40.59	0.000410004	[11] Phospho (ST)|[15] Phospho (ST)	-3.5645	0.038929	S1078, S1082
GQGSSPVAMQK	VCL	Vinculin OS=Homo sapiens OX=9606 GN=VCL PE=1 SV=4	24.15	0.00132119	[4] Phospho (ST)	-2.73268	0.00404925	S345
LSSSGLR	SHC3	SHC-transforming protein 3 OS=Homo sapiens OX=9606 GN=SHC3 PE=1 SV=1	30.96	0.000890328	[4] Phospho (ST)	-2.37876	0.0728005	S79
LSRGSIDR	PTK2	Focal adhesion kinase 1 OS=Homo sapiens OX=9606 GN=PTK2 PE=1 SV=2 FAK 843S	10.72	0.0018114	[5] Phospho (ST)	-2.10109	0.00134756	S843
Identified up-regulated phosphopeptides in ΔITGA2 cells
SRDATPPVSPINMEDQER	JUNB	Transcription factor jun-B OS=Homo sapiens OX=9606 GN=JUNB PE=1 SV=1	32.57	0.000757895	[1] Phospho (ST)	2.32396	0.0199661	S251
YLSFTPPEKDGFPSGTPALNAK	PAK2	Serine/threonine-protein kinase PAK 2 OS=Homo sapiens OX=9606 GN=PAK2 PE=1 SV=3	12.59	0.00186451	[3] Phospho (ST)	2.33546	0.0246042	S141
RTSMGGTQQQFVEGVR	CTNNB1	Catenin beta-1 OS=Homo sapiens OX=9606 GN=CTNNB1 PE=1 SV=1	92.19	0	[4] Oxidation (M)|[7] Phospho (ST)	2.39081	0.00306867	T556
YLSFTPPEK	PAK2	Serine/threonine-protein kinase PAK 2 OS=Homo sapiens OX=9606 GN=PAK2 PE=1 SV=3	41.03	0.000310142	[3] Phospho (ST)	2.55203	0.00889987	S141
RLSVELTSSLFR	CTNNB1	Catenin beta-1 OS=Homo sapiens OX=9606 GN=CTNNB1 PE=1 SV=1 (S675)	0	97.346	[3] Phospho (ST)	3.94903	5.02011e-05	S675
PFNTYPR	PAK4	Serine/threonine-protein kinase PAK 4 OS=Homo sapiens OX=9606 GN=PAK4 PE=1 SV=1	31	0.000891699	[4] Phospho (ST)	4.04368	0.0249153	T207
ADVQLFMDDDSYSHHSGLEYADPEK	CAV2	Caveolin-2 OS=Homo sapiens OX=9606 GN=CAV2 PE=1 SV=2	0	92.4125	[16] Phospho (ST)	4.31955	0.000156313	S23
SPQMVSAIVR	CTNNB1	Catenin beta-1 OS=Homo sapiens OX=9606 GN=CTNNB1 PE=1 SV=1 (S191)	73.32	0.000229568	[1] Phospho (ST)|[4] Oxidation (M)	4.92017	0.000282625	S191
TVSDSIKK	TLN1	Talin-1 OS=Homo sapiens OX=9606 GN=TLN1 PE=1 SV=3	15.54	0.00166143	[3] Phospho (ST)	5.90302	0.000120759	S1641
GSLASLDSLR	CTNND1	Catenin delta-1 OS=Homo sapiens OX=9606 GN=CTNND1 PE=1 SV=1	0.000226424	90.0853	[2] Phospho (ST)|[5] Phospho (ST)	7.6821	2.93981e-06	S346, S349
THKPDPGTPQHTSSRPPEPQK	TJP2	Tight junction protein ZO-2 OS=Homo sapiens OX=9606 GN=TJP2 PE=1 SV=2	0.00155168	23.7092	[8] Phospho (ST)	9.65127	2.06973e-07	T1131
AMADELSEK	CAV1	Caveolin-1 OS=Homo sapiens OX=9606 GN=CAV1 PE=1 SV=4	0.000310591	43.8693	[7] Phospho (ST)	9.99542	5.27091e-07	S37
EDSSVASSDRSSVER	BACH1	Transcription regulator protein BACH1 OS=Homo sapiens OX=9606 GN=BACH1 PE=1 SV=2	0.000458043	23.5676	[12] Phospho (ST)	12.062	1.75995e-06	S388

## Sheet: Supplementary file 1d
Supplementary file 1d. Clinical and pathological information of patient samples used in this study
Patient ID	Age in years	Tumor_TYPE	Histotype	Stage	Grade	Ascites	Pathology confirmed omentum	CA125 (U/ml)	WB	ATCs	Proteomic
O1	52	Ovarian	endometrioid	IA	3		tumor free	68.6	V
O2	50	Benign					tumor free		V
O3	59	Uterine	serous				tumor free		V
O4	41	Benign					tumor free	26.8	V
O5	79	Benign					tumor free		V
O6	69	Benign					tumor free	41.8	V
O7	62	Benign				N/A	tumor free	6.2	V		V
O8	50	Benign				N/A	tumor free		V		V
O9	39	Benign				N/A	tumor-free	5.5	V		V
O10	60	Benign				N/A	tumor-free	224	V
O11	30	Benign				N/A	tumor-free		V
O12	51	Benign				N/A	tumor free		V
O13	65	Benign				N/A	tumor free	412	V
O14	76	Uterine	endometriod	IA	1	N/A	tumor free		V
O15	66	Tubal	likely serous				tumor free		V
O16	32	Benign					tumor free	19.5	V
O17	42	Uterine	endometrioid	IB		No	tumor free				V
T1	67	Ovarian	serous	IIIC	3		metastasis	714.9	V
T2	65	Ovarian	serous	IIIC	3		metastasis	824.4	V
T3	56	Ovarian	serous	IIIB	3		metastasis	592.1	V
T4	52	Ovarian	serous	IIIC	2		metastasis	276	V
T5	50	Ovarian	serous	IIIC	3		metastasis	34	V
T6	52	Ovarian	serous	IIIC	3		metastasis	245.1	V
T7	80	Ovarian	serous	III	3	Yes	metastasis	178	V
T8, AS17	54	Ovarian	serous	IV	3	Yes	metastasis		V	V	V
T9, AS18	48	Tubal	serous	IIIC	3	Yes	metastasis		V	V
T10	78	Tubal	serous	IV	3		metastasis	42	V
T11	57	Tubal	serous	IIIC	3		metastasis	571	V		V
T12	79	Tubal	serous	IIIC	3		metastasis		V
T13, AS19	77	Ovarian	serous	IV	3	Yes	metastasis	816	V	V	V
T14, AS20	80	Ovarian	serous		3	Yes	metastasis	1259		V
T15, AS21	84	Tubal	serous	IIIB	3	Yes	metastasis			V	V
T16, AS22	58	Ovarian	serous	IIIC	3	Yes	metastasis	356	V	V
T17, AS23	74	Ovarian	serous/ MMMT			Yes	metastasis	155	V	V
T18, AS24	67	Ovarian	serous	IV	3	Yes	metastasis	1938		V
T19	70	Ovarian	serous	IIIC	3		metastasis		V
T20	81	Ovarian	serous	IIIC	3		metastasis	656.6	V
T21	59	Uterine	serous	IIIB	3		metastasis		V
T22, AS25	62	Tubal	serous	IIIB	3	Yes		4733		V
T23, AS26	77	Tubal	serous	IIIC	3	Yes	metastasis	150	V	V
T24	52	Ovarian	serous	IIB	3		metastasis		V
T25	59	Ovarian	serous	IIIC	2		metastasis	732	V
T26	42	Ovarian	serous	IIIc	3		metastasis	102	V
AS1	59	Ovarian*	serous	IIIC	3	Yes		1370		V
AS2	67	Ovarian	serous	IV	3	Yes		1617		V
AS3	75	Ovarian	serous	IIIc	3	Yes		939		V
AS4	45	Ovarian	serous	IIIa	3	Yes		372		V
AS5	67	Ovarian	serous	IIIC	3	Yes		680		V
AS7	54	Ovarian	mixed	IIIC	3	Yes		494		V
AS8	67	Ovarian	serous	IIIA		Yes		236		V
AS9	68	Ovarian	clear cell	IIIC	3	Yes		177.3		V
AS10	71	Ovarian	serous	IIIC	3	Yes		2231		V
AS11	78	Tubal	serous	IIIC	3	Yes		1182		V
AS12	44	Tubal	serous	IV	3	Yes	metastasis	3900	V	V
AS13	88	Ovarian	serous	III	3	Yes				V
AS14	70	Ovarian	serous	IV	3	Yes		1653		V
AS15	62	Ovarian	clear cell	II	3	Yes	uncertain	261		V
AS16	67	Tubal	serous	IIIC	3	Yes	metastasis	298		V

## Sheet: Supplementary file 1e
Supplementary file 1e. Clinical and pathological information of patient samples in tissue microarray (TMA)
TMA_ID	Diagnosis	Stage	Grade	CA125	BMI	ResidualDisease	Ethnicity
S423	Clear Cell Endometrial Cancer	IA		17	26.7	Nil	Caucasian
S14	Clear Cell Ovarian Cancer	IC		719	19.6	Nil	Caucasian
S100	Clear Cell Peritoneal Cancer	III	3	104	35.4	Individual deposits over 5cm	Caucasian
S123	Endometrioid Ovarian Cancer	I	1	835	19.6	Nil	Caucasian
S13	Endometrioid Ovarian Cancer	IA	1	9	36.8	Nil	Caucasian
S144	Endometrioid Ovarian Cancer	III	3	4660	27.0	N/A	Caucasian
S148	Endometrioid Ovarian Cancer	IIB	2	8		Nil	Asian
S156	Endometrioid Ovarian Cancer	IC	2	69	29.3	4cm right lower pelvic recurrence	Caucasian
S206	Endometrioid Ovarian Cancer	I	1	304	16.6	Nil	Caucasian
S214	Endometrioid Ovarian Cancer	I	2	59	27.0		Caucasian
S230	Endometrioid Ovarian Cancer	I	1	10	26.6		Caucasian
S242	Endometrioid Ovarian Cancer	IA	1	49	20.8	Nil	Asian
S253	Endometrioid Ovarian Cancer	IIC	2	10	20.8	Nil	Asian
S352	Endometrioid Ovarian Cancer	IA	1	49	37.5	Nil	Caucasian
S469	Endometrioid Ovarian Cancer	I	1	106	23.5	Nil	Caucasian
S497	Endometrioid Ovarian Cancer	III	3		32.4	Nil	Caucasian
S522	Endometrioid Ovarian Cancer	IC	2	12	41.3	Nil	Caucasian
S343	Endometrioid Ovarian Cancer	I	1
S363	Endometrioid Ovarian Cancer	IA	3	5	25.8		Caucasian
S199	Mixed Ovarian Cancer	III	3	77	25.0	Tumor on small curvature of stomach	Caucasian
S215	Mixed Ovarian Cancer			125	25.3	Deposis > 1 cm	Caucasian
S452	Mixed Ovarian Cancer		2		24.1	Nil	Caucasian
S481	Mixed Ovarian Cancer			416			Caucasian
S505	Mixed Ovarian Cancer			245		Extensive diseases over 1cm: liver surface, bilateral diaphragm, peritoneum, bowel mesentery	Caucasian
S107	Mixed Ovarian Cancer	IIIC	2	134	33.7	Nil	Caucasian
S142	Mixed Ovarian Cancer	III	1	11700	23.4	Nil	Caucasian
S22	Mixed Ovarian Cancer	IA	1	456	45.0	Nil	Caucasian
S302	Mixed Ovarian Cancer	I	3	19	25.8	Placque at vault >1cm	Caucasian
S44	Mixed Ovarian Cancer	IIIC	3	73		Yes	Caucasian
S479	Mixed Ovarian Cancer	III	1	7	31.3	0	Caucasian
S507	Mixed Ovarian Cancer	III		442	21.4	Nil	Caucasian
S56	Mixed Ovarian Cancer	IV	3	1500	22.2	Disease in POD, sigmoid, diaphragm (>1cm)	Caucasian
S97	Mixed Ovarian Cancer	IB	3	411		Nil	Caucasian
S232	Mixed Ovarian Cancer	III	3	39400	30.8	Sandgrain disease in plevis, gutters and diaphragm (1-2 mm)	Caucasian Jewish
S248	Mixed Ovarian Cancer		3	12	18.7	Nil	Caucasian
S160	MMMT Ovary	III	3	40	34.2	Nil	Caucasian
S18	MMMT Ovary	IIIC	3	157		Sandgrain disease on diaphragm (<0.5cm)	Caucasian
S224	MMMT Ovary	III		525	20.0	Multiple (palliative operation)	Indian
S249	MMMT Ovary	III	1		20.8	Fibrotic appearing little 0.5cm nodules within pelvis	Caucasian
S382	MMMT Ovary	III	3	761	41.2	Nil	Caucasian
S404	MMMT Ovary			2638	23.4	Carpet of disease >2cm in POD, on sigmoid colon, diaphragm and within transverse colon	Caucasian
S435	MMMT Ovary	IIIC		84	24.2	Nil	Caucasian
S477	MMMT Ovary	I	3	86	33.1	Nil	Asian
S132	Mucinous Ovarian Cancer	I	1	7	31.3	Nil	Caucasian Jewish
S15	Mucinous Ovarian Cancer	III	2	353	21.2		Caucasian
S180	Mucinous Ovarian Cancer	IA	1	10	25.1		Caucasian
S185	Mucinous Ovarian Cancer	I	3	26	17.1	Nil	Caucasian
S196	Mucinous Ovarian Cancer	I	1		22.3		Caucasian Jewish
S315	Mucinous Ovarian Cancer	IA	2	270	27.7	Nil	Caucasian
S364	Mucinous Ovarian Cancer	I	1	55	26.4	Nil	Caucasian
S40	Mucinous Ovarian Cancer	IA	1	203		Nil	Caucasian
S268	Serous Ovarian Cancer				27.5		Caucasian
S532	Serous Ovarian Cancer				27.9		Caucasian Jewish
S543	Serous Ovarian Cancer	IIIC		800	33.2	Nil	Caucasian
S158	Serous Cystadenoma			8	30.4		Caucasian
S181	Serous Cystadenoma			85	31.3	Nil	Caucasian
S243	Serous Cystadenoma			171	23.4	Nil	Caucasian
S295	Serous Cystadenoma			7		Nil	Caucasian
S377	Serous Cystadenoma			99	35.5	Nil	Caucasian
S472	Serous Cystadenoma				22.0	Nil	Caucasian
S489	Serous Cystadenoma			44	59.5		Caucasian
S76	Serous Cystadenoma			66	36.4	Nil	Caucasian
S77	Serous Cystadenoma			54	27.2	Nil	Caucasian Jewish
S80	Serous Cystadenoma			39	23.9	Nil	Caucasian
S93	Serous Cystadenoma			13	27.8		Caucasian Jewish
S209	Serous Ovarian Cancer	IIIC	3	20	25.0		Asian
S234	Serous Ovarian Cancer	IIIC	3		27.5	Nil	Caucasian
S52	Serous Ovarian Cancer	IV	3	127			Caucasian
S247	Serous Ovarian Cancer	III	3	818	26.2	Nil	Caucasian
S10	Serous Ovarian Cancer	IIIC	2	1153		Yes	Caucasian
S102	Serous Ovarian Cancer	IIIC	3	88	21.2	Nil	Caucasian
S103	Serous Ovarian Cancer	IIIB	3	35	24.5	Nil	Caucasian
S108	Serous Ovarian Cancer	IIIC	3	42	22.5	Nil	Caucasian
S115	Serous Ovarian Cancer	IV	3	451	24.2	Nil	Caucasian
S116	Serous Ovarian Cancer	IIIC	3	1315	30.1		Caucasian
S117	Serous Ovarian Cancer	III	3	5	24.6	Nil	Caucasian
S126	Serous Ovarian Cancer	IIIC	2	236	34.2	<1cm	Caucasian Jewish
S139	Serous Ovarian Cancer	III	3	200	23.5	Miliary disease (1cm) in paracolic gutters, POD, peritoneum, diaphragm	Caucasian
S140	Serous Ovarian Cancer	IV		625	42.3		Caucasian
S167	Serous Ovarian Cancer	III	3	47	22.4	Miliary disease within pelvis and small bowel mesentery (>1cm)	Caucasian Jewish
S172	Serous Ovarian Cancer	III	3	264	28.4	Diaphragmatic disease (over 1 cm)	Caucasian
S186	Serous Ovarian Cancer	III	3	17	25.8	Nil	African
S188	Serous Ovarian Cancer	III	3		16.9		Asian
S189	Serous Ovarian Cancer	IIIC	3	454	32.6	1cm nodules diaphragm and mesentery	Caucasian
S194	Serous Ovarian Cancer	IVB	2	28200	32.4	Lymph nodes pelvis and para-aortal	Caucasian
S195	Serous Ovarian Cancer	I	3	76	32.9	Nil	Caucasian
S231	Serous Ovarian Cancer	IV	1	4	26.8	Nil	Caucasian
S235	Serous Ovarian Cancer	IIIC	3	6830	25.4	Disease in POD, sigmoid, diaphragm (>1cm)	Asian
S251	Serous Ovarian Cancer	IVB	3	561	26.9	Diaphragm, paracolic gutters (<1cm), liver metastases (2cm)	Caucasian
S258	Serous Ovarian Cancer	III	2			Sandgrain disease (<0.5cm)	Asian
S267	Serous Ovarian Cancer	IIA	2	117	23.6	Nil	Caucasian
S274	Serous Ovarian Cancer	IIIC	3	6	22.0	Nil	Caucasian Jewish
S28	Serous Ovarian Cancer	III					Caucasian
S289	Serous Ovarian Cancer	IVB	3	1092	23.4	Confluent lesions on diaphragm. 1cm nodules on bowel mesentery.	Caucasian
S298	Serous Ovarian Cancer	III	3	284	22.9	Miliary disease in paracolic gutters and on diaphragm	Caucasian
S308	Serous Ovarian Cancer	III	3	1605	21.0	Broad based (>1cm) ~5cm diameter plaque at POD and pre-sacral area + Scattered 1cm nodules under both diaphragms	Caucasian
S318	Serous Ovarian Cancer	IV	3	1845			Caucasian
S326	Serous Ovarian Cancer	III	2	471	23.4	Minimal disease (<1cm) around remainder of bowel	Caucasian
S327	Serous Ovarian Cancer	III	3	723	22.2	Nil	Caucasian
S342	Serous Ovarian Cancer	III					Asian
S351	Serous Ovarian Cancer	III	3	1619		Multiple 0.5cm nodules on right diaphragm and pelvic peritoenum	Caucasian
S357	Serous Ovarian Cancer	III	3	188		Nil	Caucasian Jewish
S358	Serous Ovarian Cancer	III	3			Nil	Caucasian Jewish
S360	Serous Ovarian Cancer	III	3	193	22.9	<2cm	Caucasian
S365	Serous Ovarian Cancer	IIIC	2	1040	25.0	Miliary disease in paracolic gutters and on diaphragm, tumor nodules within mesentery of small bowel and sigmoid colon	Caucasian Jewish
S38	Serous Ovarian Cancer	IIIC	3	1065	27.0	Miliary disease in paracolic gutters and on diaphragm, tumor nodules within mesentery of small bowel and sigmoid colon	Caucasian
S415	Serous Ovarian Cancer	IIC	3		20.6		Caucasian
S416	Serous Ovarian Cancer	IV	1	11461	24.8		Caucasian
S422	Serous Ovarian Cancer	III	3	773	31.3	Lymph node near porta hepatis (1cm)	Caucasian
S450	Serous Ovarian Cancer	IVA	3	29	29.4	Nil	Caucasian
S459	Serous Ovarian Cancer	IV	3	88	24.7	Nil	Caucasian
S46	Serous Ovarian Cancer	IIIC	3	8	23.8	Nil	Caucasian
S463	Serous Ovarian Cancer	IIIC	3	830	29.4	Disease in POD, sigmoid, diaphragm (>1cm)	Caucasian
S485	Serous Ovarian Cancer	IVA	3	498	28.2	Mesenteric tumor nodules >1cm	Caucasian
S49	Serous Ovarian Cancer	IIIC	3	25	26.8	one single tumor nodule 0.5 cm on diaphragm	Caucasian
S5	Serous Ovarian Cancer	IIIC	1	114	31.9	Massive disease	Caucasian
S504	Serous Ovarian Cancer	I	3	27		Nil	Caucasian
S51	Serous Ovarian Cancer	IIIC	2	750		Diaphragmatic disease (1.5cm)	Caucasian
S519	Serous Ovarian Cancer	IIIC	3	501	35.7	Nil	Caucasian
S520	Serous Ovarian Cancer	IIIC		11	32.0	Nil	Caucasian
S525	Serous Ovarian Cancer	IIIC	3	560	26.0	Nil	Caucasian
S528	Serous Ovarian Cancer	III	3	415		Nil	Caucasian
S533	Serous Ovarian Cancer				25.5		Caucasian
S59	Serous Ovarian Cancer	IIIC	3	900	28.0	Disease in POD, sigmoid, diaphragm (>1cm)	Caucasian
S6	Serous Ovarian Cancer	IIIC	3	2645			Caucasian Jewish
S60	Serous Ovarian Cancer	IIIC	1	45	21.5	Nil	Asian
S62	Serous Ovarian Cancer	IIIC	3	57	27.3	Nil	Caucasian
S66	Serous Ovarian Cancer	IIIC	3	470	19.5		Caucasian
S69	Serous Ovarian Cancer	IIIC	3	3100	21.5	Sandgrain disease on diaphragm (<0.5cm)	Caucasian
S70	Serous Ovarian Cancer	IIIC	3	1188	19.5	Disease in POD, sigmoid, diaphragm (>1cm)	Caucasian
S74	Serous Ovarian Cancer	IV	2	36680	23.4		Caucasian
S83	Serous Ovarian Cancer	II	2		23.1	Nil	Caucasian Jewish
S85	Serous Ovarian Cancer	IIB	3	511	26.0	Nil	Caucasian Jewish
S86	Serous Ovarian Cancer	III	3	22000	22.6	N/A	Caucasian Jewish
S87	Serous Ovarian Cancer	IVA	3	44	20.8	Necrotic cancer on POD side wall	Caucasian Jewish
S9	Serous Ovarian Cancer	II	3	106	20.1	Nil	Caucasian
S92	Serous Ovarian Cancer	III	2	31		Nil	Caucasian
S11	Serous Tubal Cancer	IC	3	13		Nil	Caucasian
S175	Serous Tubal Cancer	IIIB	3	13	31.2	Nil	Caucasian
S191	Serous Tubal Cancer	III	3	1120	28.6	Peritoneal and Mesenteric seeding all < 1cm	Caucasian
S228	Serous Tubal Cancer	II	2	25	19.5	Nil	Caucasian
S233	Serous Tubal Cancer	IA	3	10	26.6	Nil	Caucasian
S448	Serous Tubal Cancer	IIIA	3	2121		Nil	Caucasian
S45	Serous Tubal Cancer	IIIC	3	803	25.4	Diaphragm, paracolic gutters (1cm)	Caucasian
S458	Serous Tubal Cancer	III	3	65	31.3	Nil	Caucasian Jewish
S467	Serous Tubal Cancer	IIIC	3	12	26.6	Nil	Caucasian
S65	Serous Tubal Cancer	IC	2	8	28.7	Nil	Caucasian Jewish
S75	Serous Tubal Cancer	IIIC	3	88	23.4	Diaphragmatic disease (over 1 cm)	Caucasian
